# Supplementary material for: Role of a ZF-HD Transcription Factor in miR157-Mediated Feed-Forward Regulatory Module That Determines Plant Architecture in Arabidopsis
Source: MDPI journal article supplement (doi:10.3390/ijms23158665), 2022-08-04
Supplement: s1 [file s1]

**Figure S1.** Phenotypes of *hb33 hb34* double loss-of-function mutants. (a) Phylogenetic analysis of the ZF-HD gene family in *Arabidopsis*. The phylogenetic tree was generated by gramene [69]. (b) Plant morphology in Col-0, *hb33*, *hb34*, and *hb33 hb34*. (c) Leaf morphology in Col-0 and *hb33/hb34*. (d) SEM picture showing leaf cell morphology in Col-0 and *hb33 hb34*. (e) Plant height of Col-0 and *hb33 hb34*. (f) Number of branches of Col-0 and *hb33 hb34*. (g) Number of leaves of Col-0 and *hb33/hb34*. (h) Expression of *HB33* and *HB34* was monitored by qRT-PCR in Col-0 and *hb33/hb34*. (i) Epidermal cell size in the leaf length and leaf width direction in Col-0 and *hb33/hb34*.

**Figure S2.** Phenotypic comparison between Col-0 and *zf-hd* mutants. (a-b) Floral morphology in Col-0 (a) *hbq* (b). (c) Leaf size in Col-0, amiR *zf-HD* 79-1, and *hbq*. (d) Silique length in Col-0, amiR *zf-HD* 79-1, and *hbq*. (e) Plant height in Col-0, amiR *zf-HD* 79-1, and *hbq*.

**Figure S3.** Expression analysis of ZF-HD TF genes in various tissues including root, leaf in seedling, stem, young flower, old flower, and young silique. (a-c) qRT-PCR analysis to confirm expression of *HB31*, *HB33*, and *HB34*. Three biological replicates were used for qRT-PCR. (d) RNA-seq data for ZF-HD TF family members in young flower and root tissue. Two biological replicates were used for RNA-seq. (e) Publicly available microarray database of ZF-HD TF from GENEVESTIGATOR (<https://genevestigator.com/>, accessed on 1 June 2020).

**Figure S4.** Expression of amiRNA and targets in amiR *zf-HD* mutants.

**Figure S5.** Expression changes based on the up-regulated DE genes in *zf-hd* mutants.

**Figure S6.** Expression of *HB34* in 35S:*HB34-GFP/hb34* transgenic lines and *HB34* localization in root tissue in the transgenic 35S:*HB34-GFP/hb34* transgenic line.

**Figure S7.** Relative proportion of activated/repressed genes associated with enriched GO terms among the directly bound targets of *HB34*.

**Figure S8.** Genome wide distribution of *HB34* motifs. (a) Sequence logo of novel *HB34* motif (b) position frequency distribution graph based on novel *HB34* motif and two other PWMs for *HB34* (ZFHD\_tnt.ATHB34\_col\_a\_m1; ZFHD\_tnt.ATHB34\_colamp\_a\_m1) obtained from the publicly available Plant Cistrome Database.

**Figure S9.** Genome-wide binding target analysis of *HB34* reveals that *HB34* directly regulates *BRC1*. (a) Genome browser view showing *HB34* ChIP-seq reads aligned near *BRC1*. (b) Heat map of TCP and HD-ZIP TF in amiR *zf-HD* and *hbq* in comparison with WT. (c) Heat map of bZIP and NAC TF in amiR *zf-HD* and *hbq* in comparison with WT.

**Table S1.** Sequences of primers used for mutant genotyping, expression analysis of qRT-PCR, and transient assay vector construction.

**Table S2.** Expression changes of individual down- or up-regulated TF DEGs.

**Table S3.** Expression changes of miRNAs and miRNA targets in Col-0, amiR *zf-HD*, and *hbq*.

**Table S4.** Network motif analysis based on the RNA-seq. data and miRNA target.

**Table S5.** Molecular perturbation grouped by TF family that is directly bound and modulated by ZF-HD TFs in Col-0, amiR *zf-HD*, and *hbq*.

**Table S6.** Direct target genes of *HB34* identified by ChIP-seq analysis.
