# Supplementary material for: Role of a ZF-HD Transcription Factor in miR157-Mediated Feed-Forward Regulatory Module That Determines Plant Architecture in Arabidopsis
Source: MDPI journal article supplement (doi:10.3390/ijms23158665), 2022-08-04
Supplement: s1 [file s1]

Figure S1

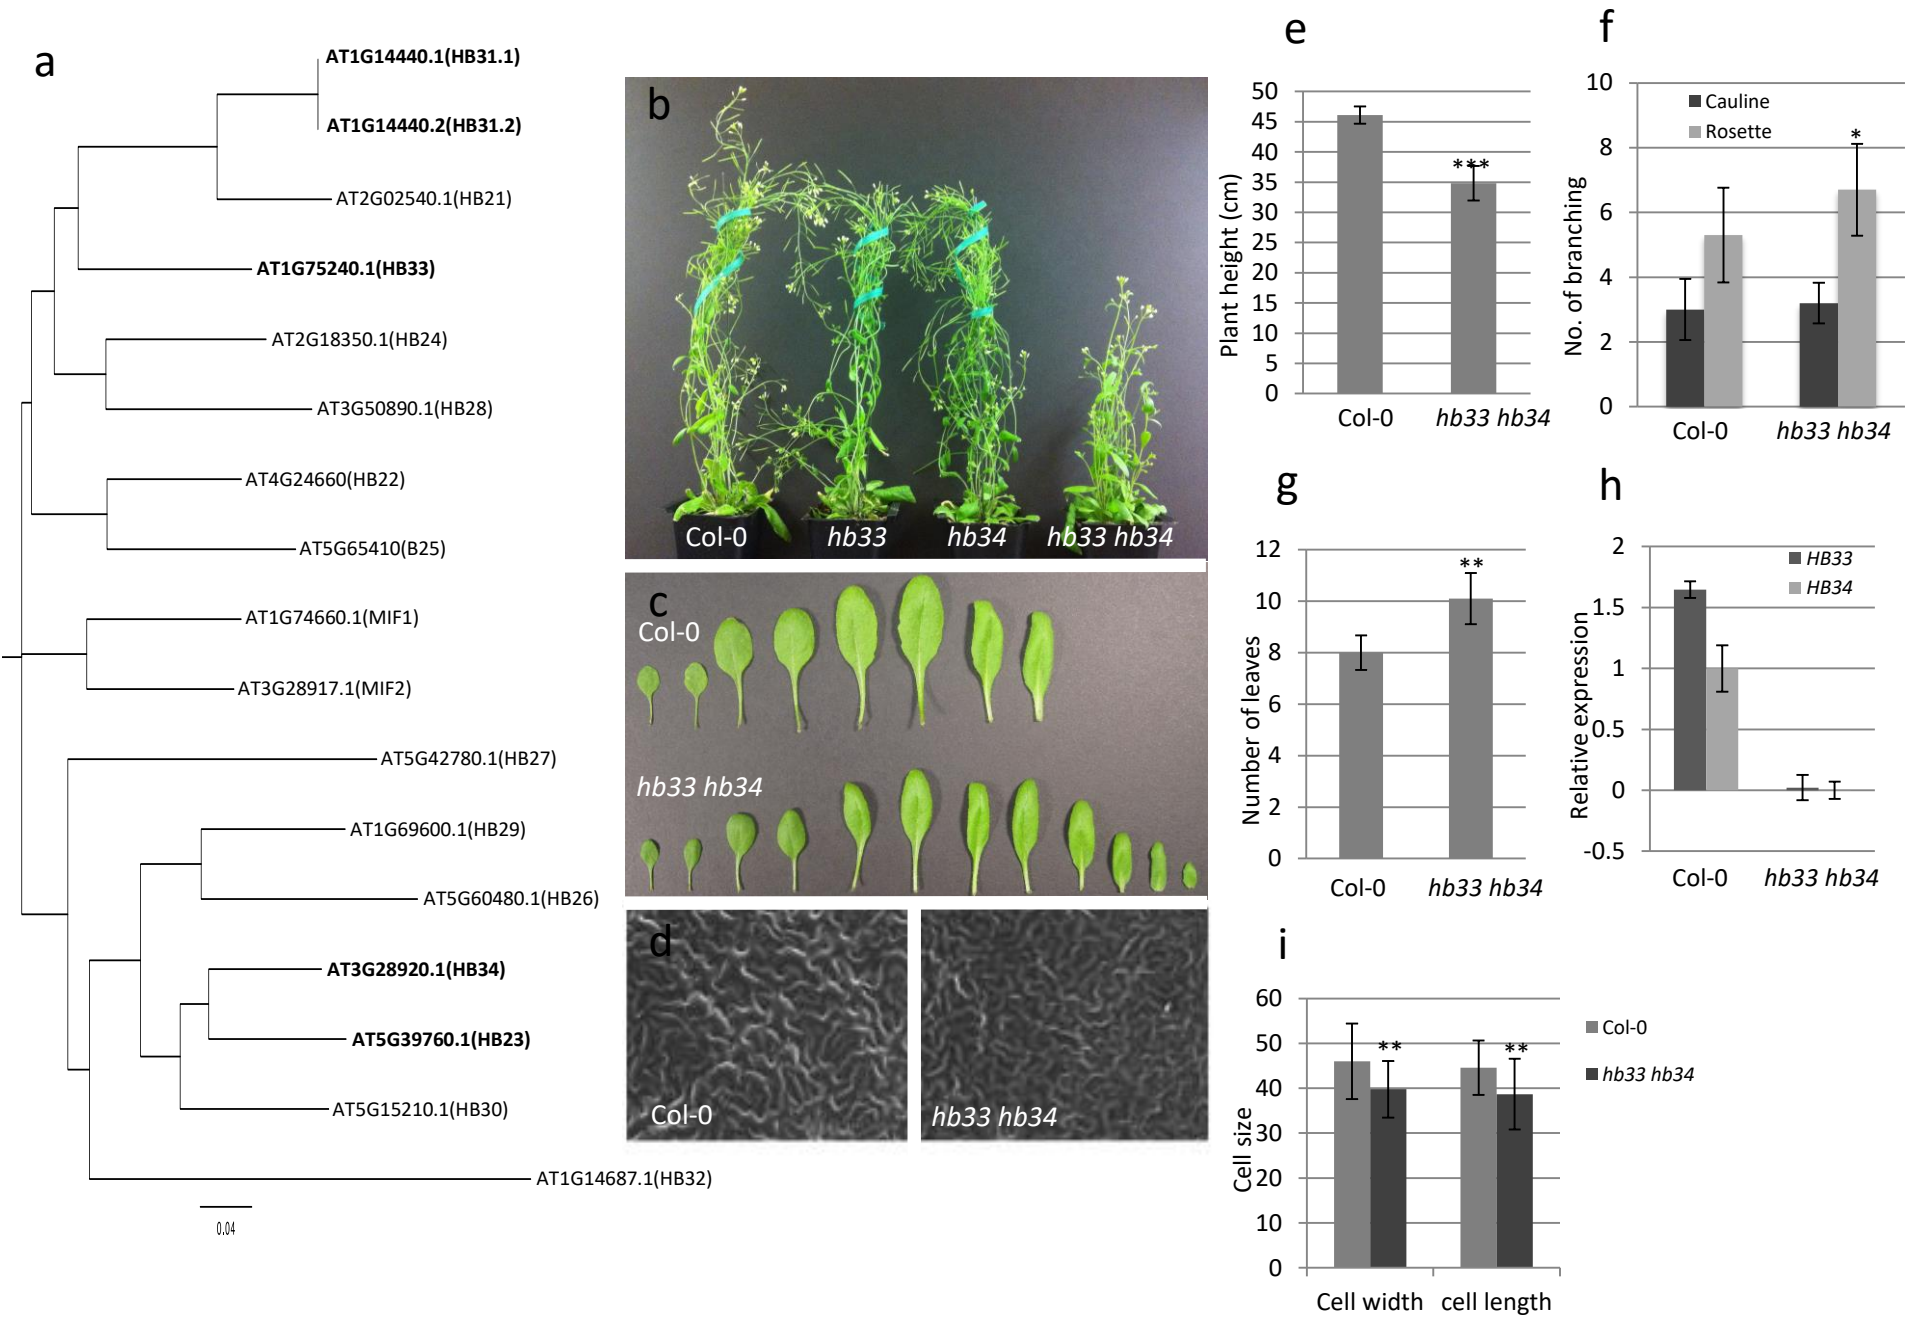

**Figure S2**

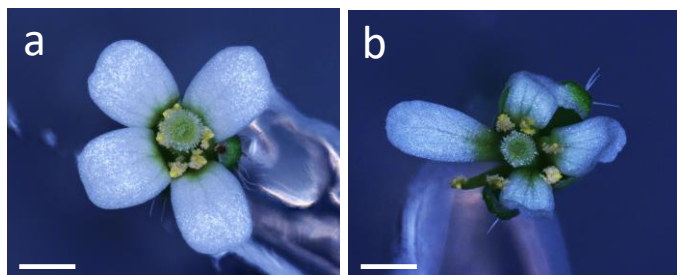

**c**

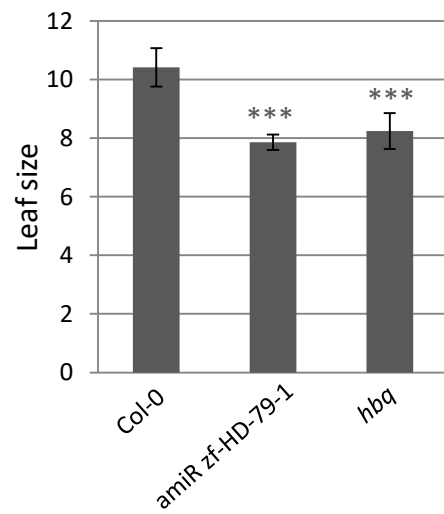

**d**

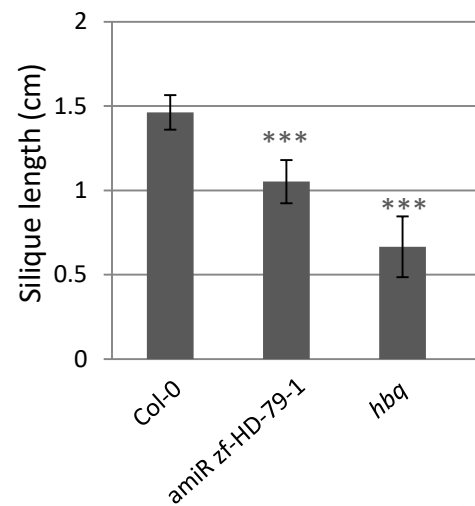

**e**

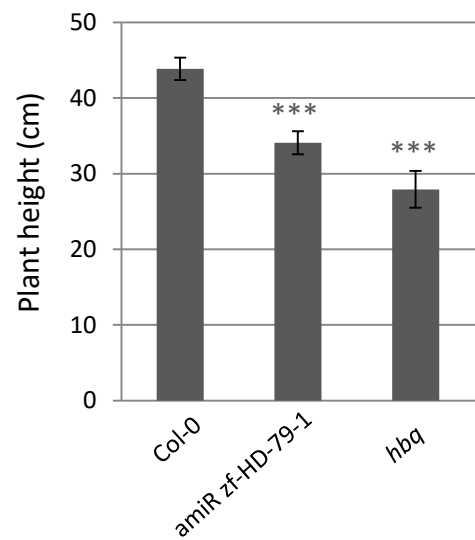

# Figure S3

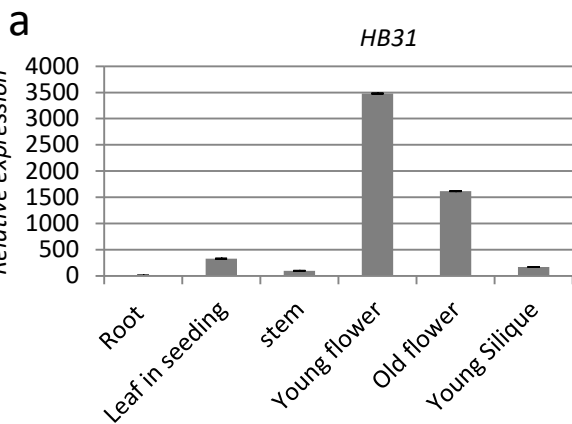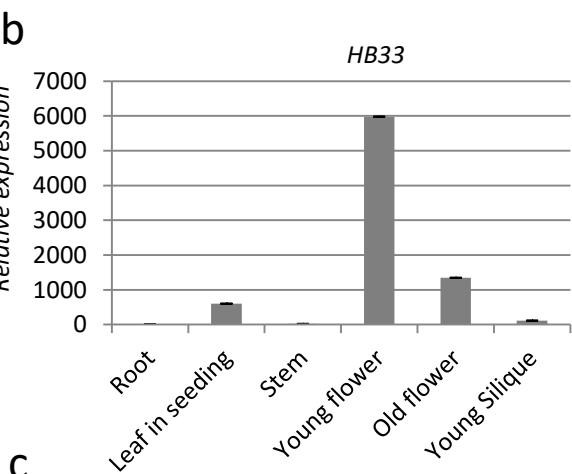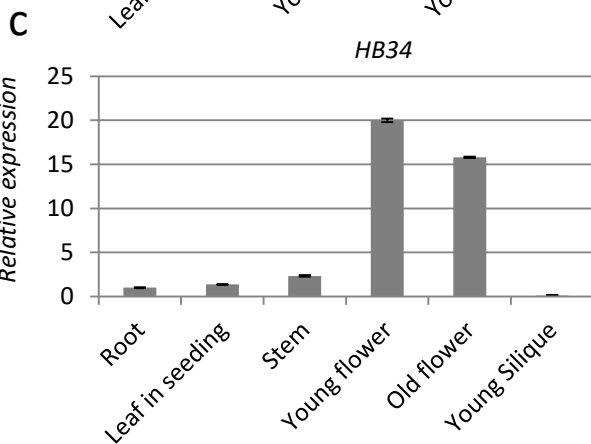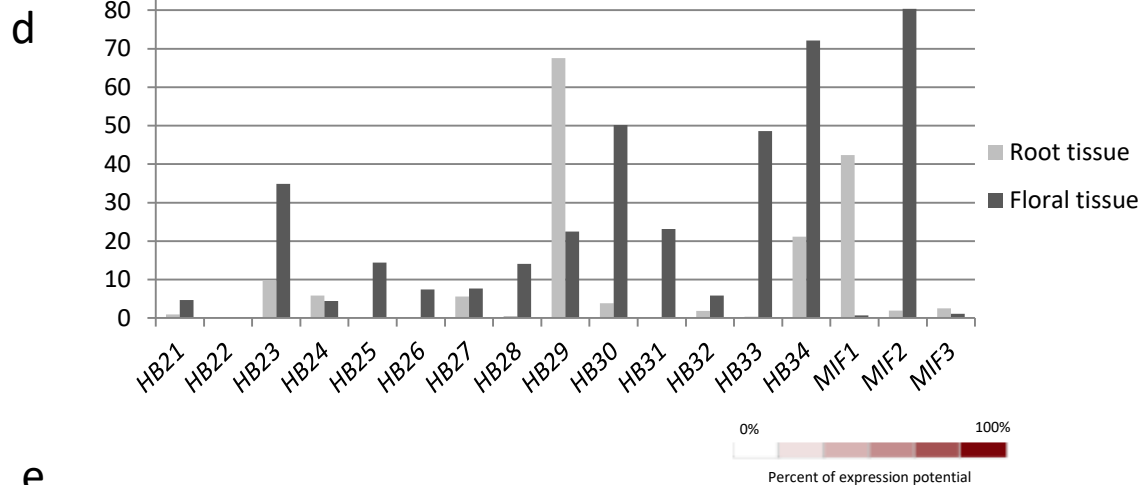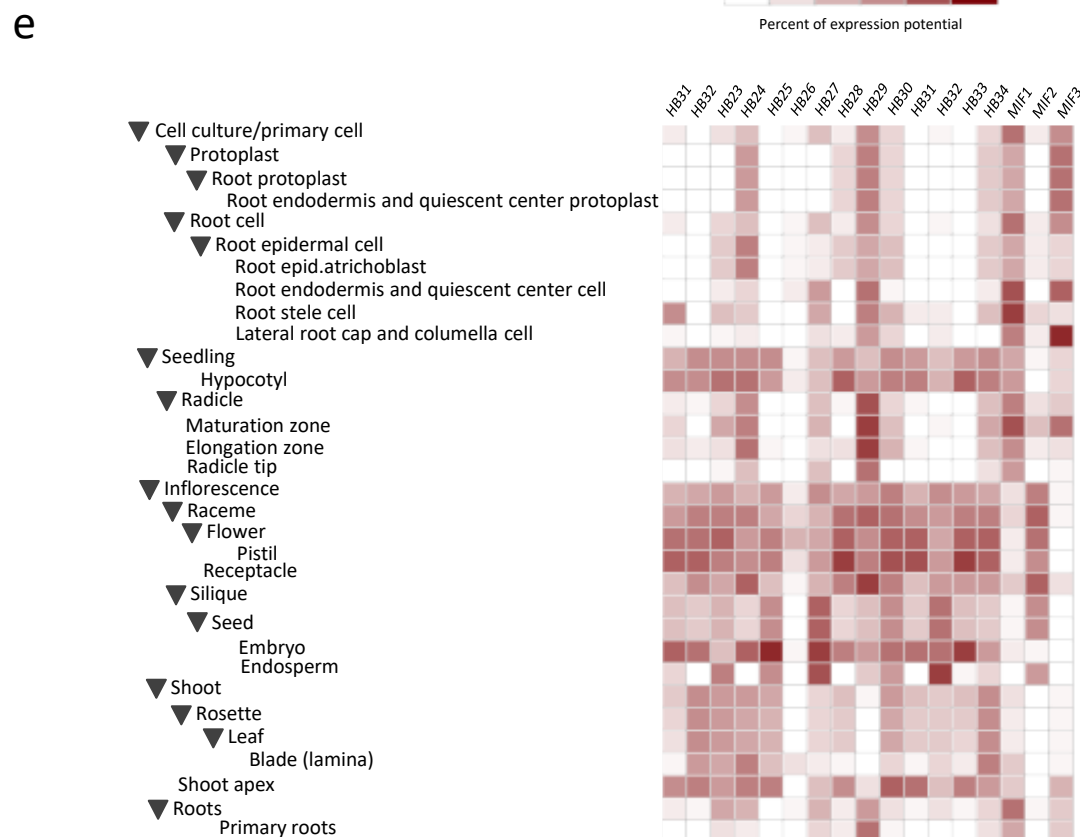

**Figure S4**

**a**

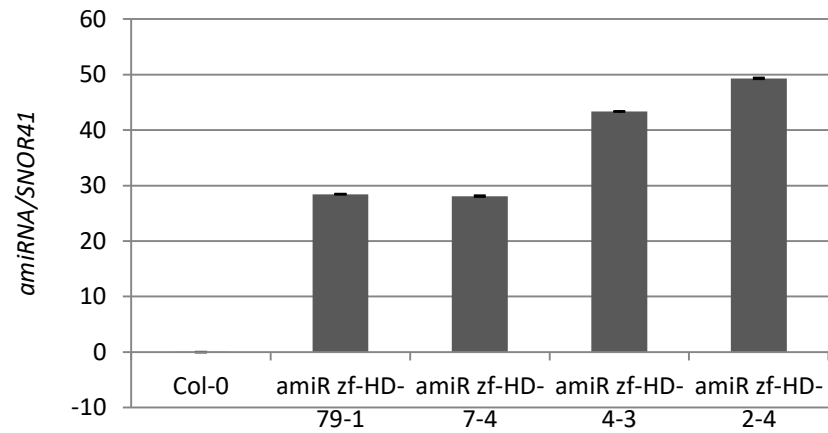

**b**

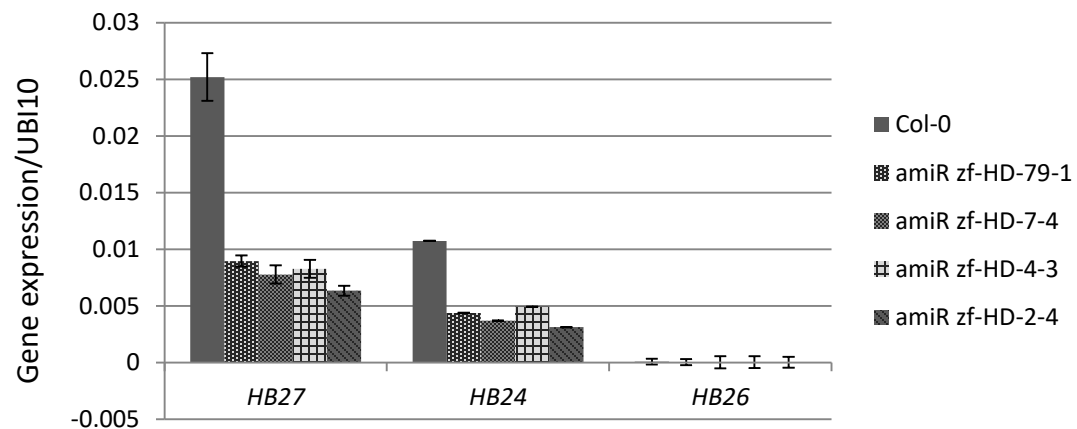

**c**

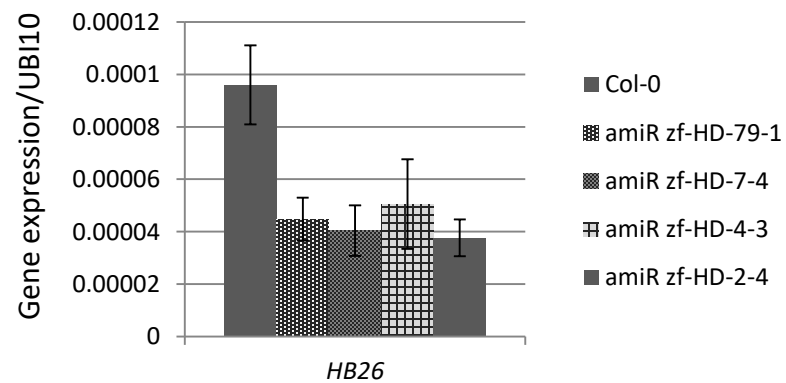

**Figure S5**

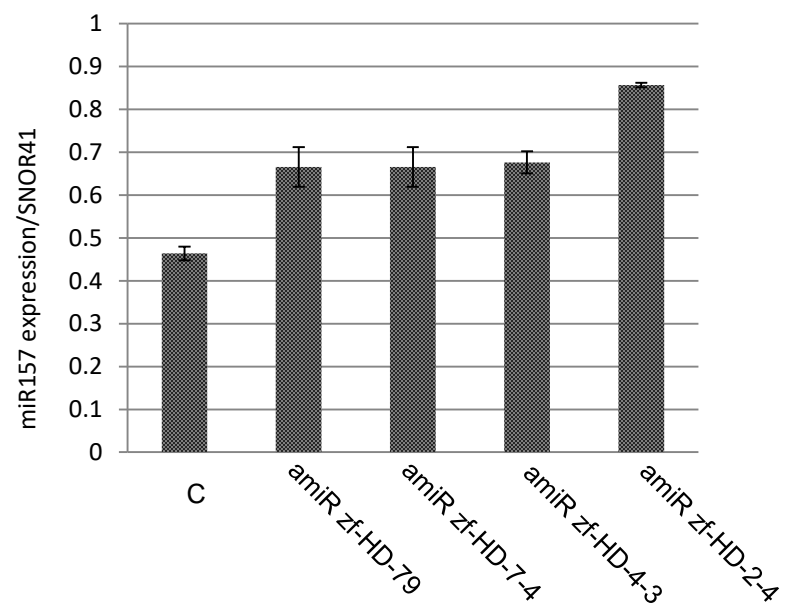

Figure S6

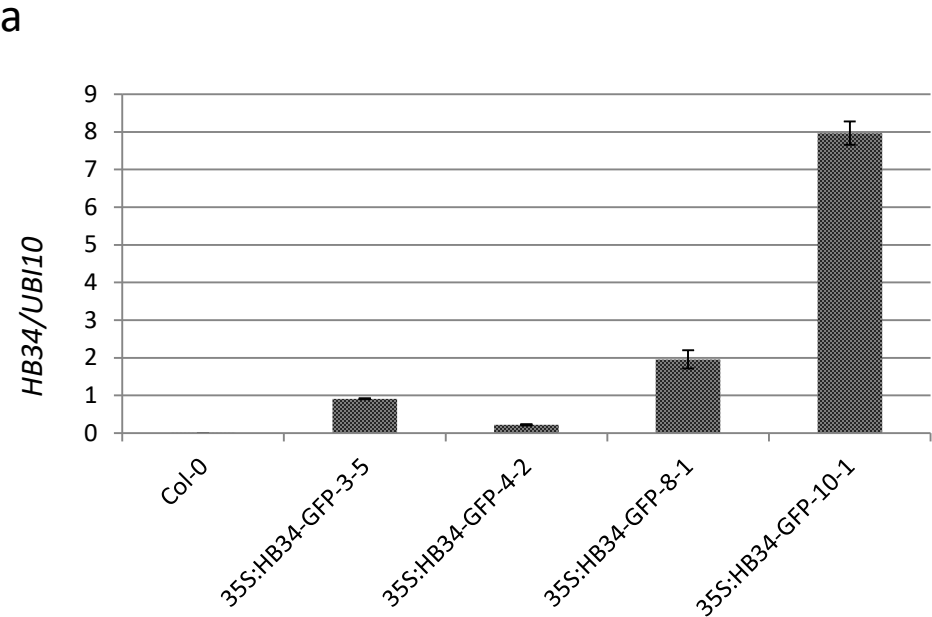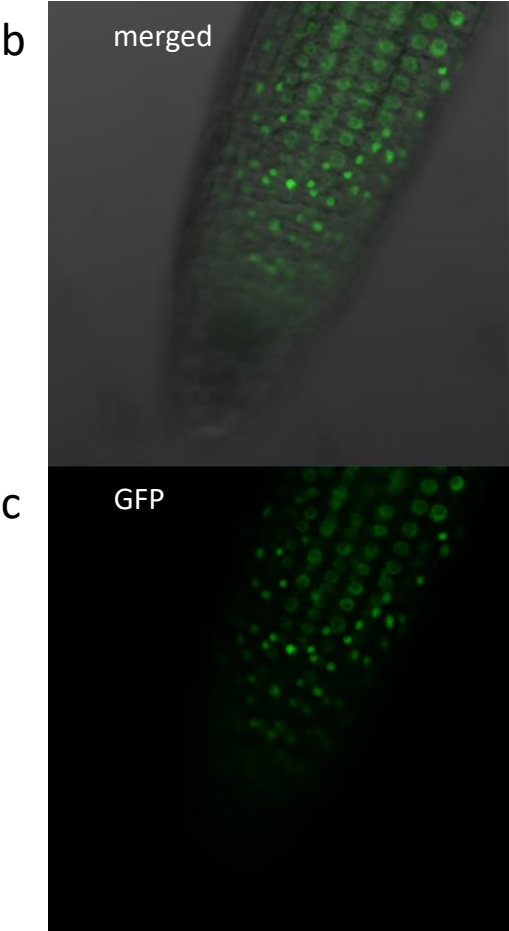

Figure S7

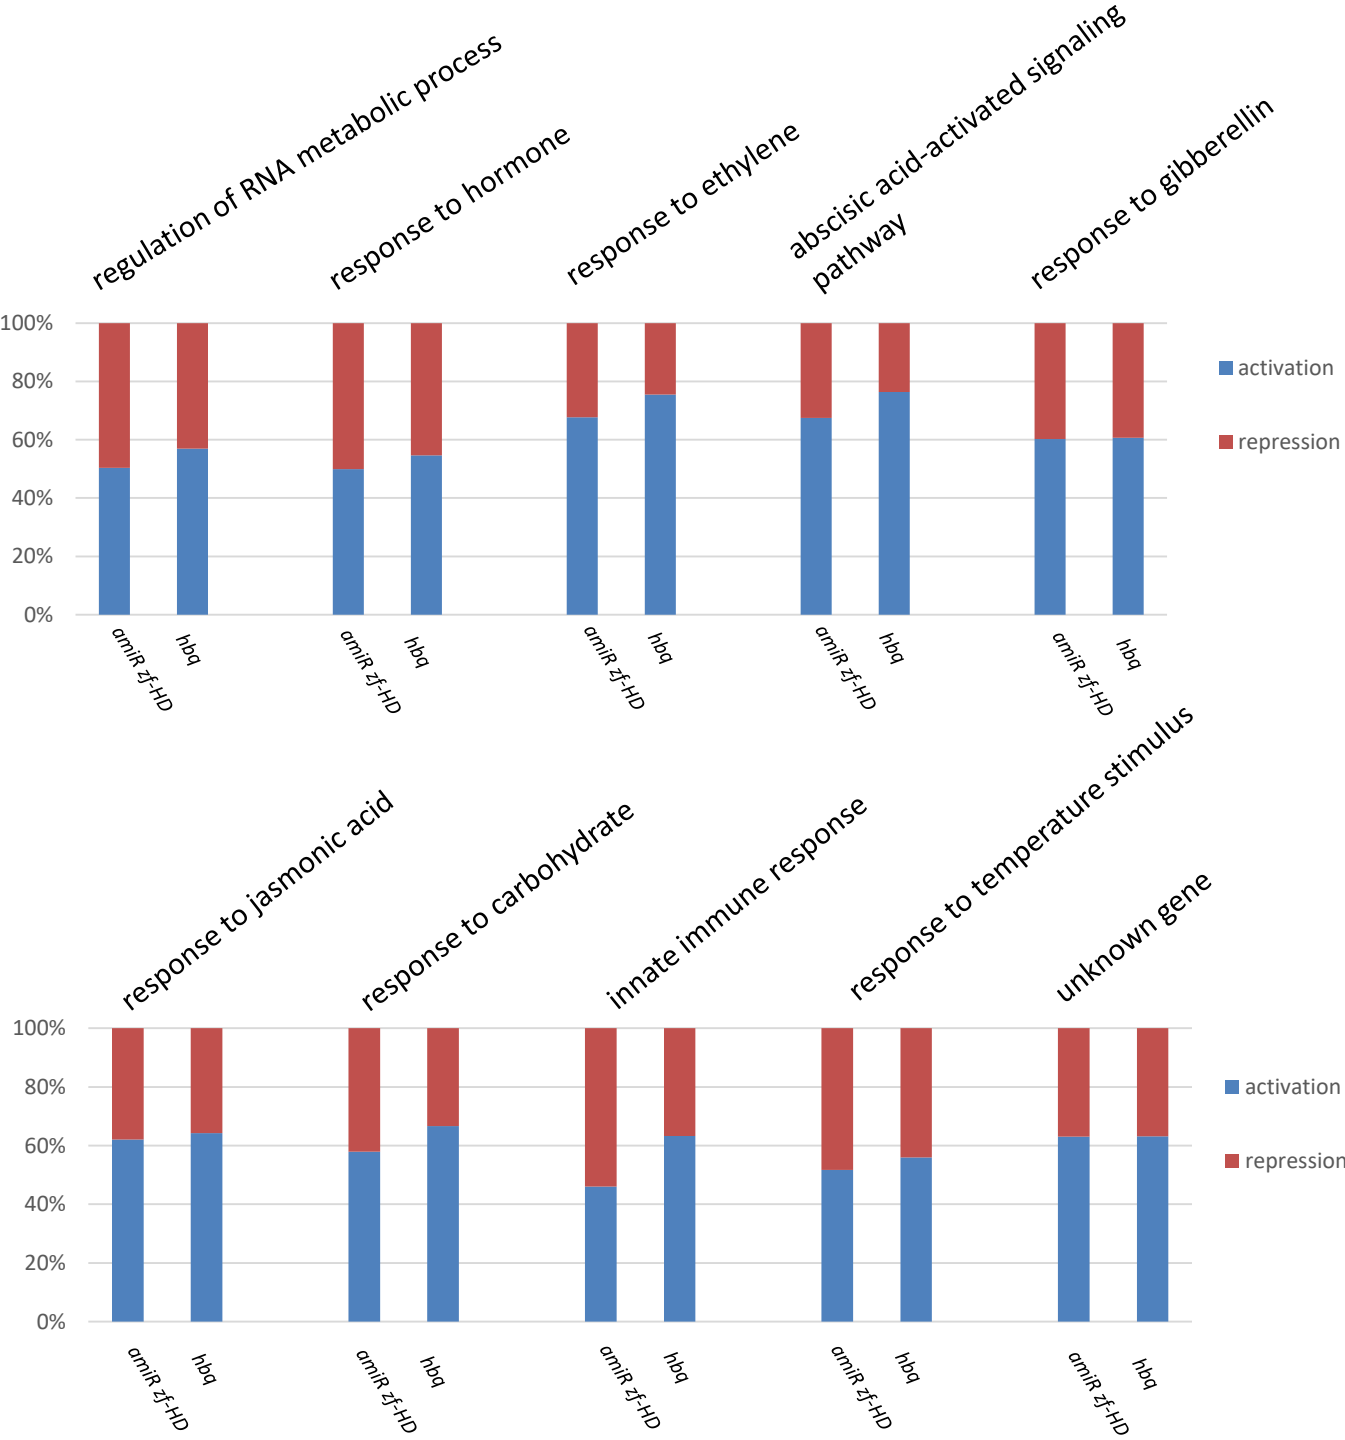

Figure S8

a

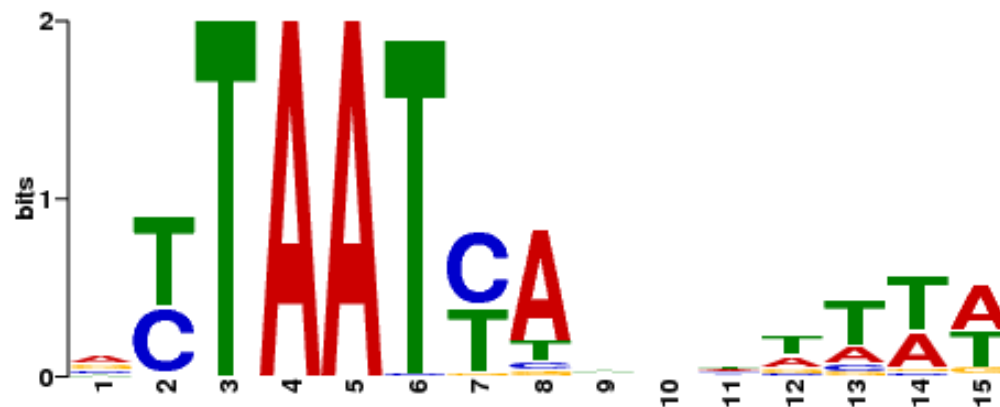

b

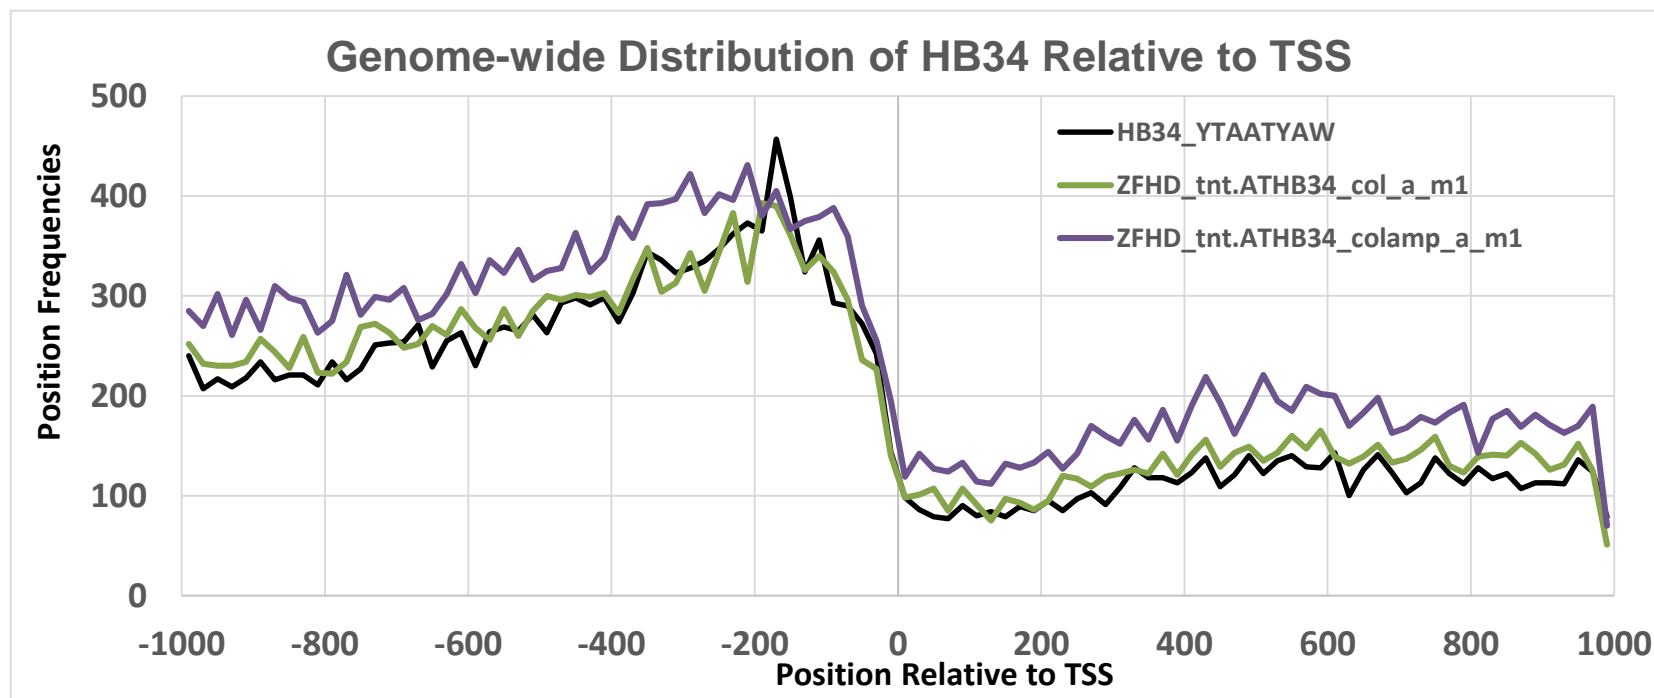



Figure S9

a

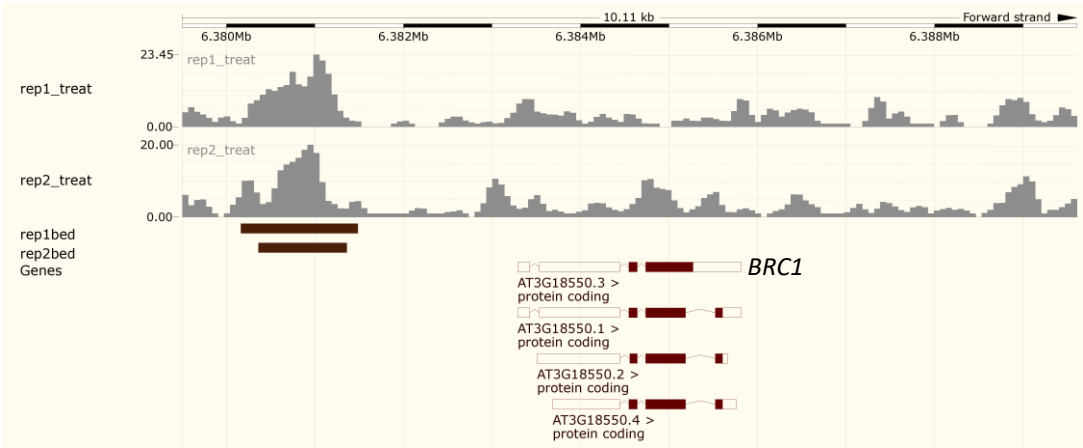

b

| TF family members | Gene id   | amiR zf-HD | hbq | Gene name  |
|-------------------|-----------|------------|-----|------------|
| TCP               | AT3G18550 |            |     | BRC1       |
| HD-ZIP            | AT1G17920 |            |     | HDG12      |
| HD-ZIP            | AT1G26960 |            |     | AtHB23     |
| HD-ZIP            | AT1G27045 |            |     | ATHB-54    |
| HD-ZIP            | AT1G30490 |            |     | PHV        |
| HD-ZIP            | AT1G52150 |            |     | ATHB-15    |
| HD-ZIP            | AT1G69780 |            |     | ATHB13     |
| HD-ZIP            | AT1G70920 |            |     | ATHB18     |
| HD-ZIP            | AT1G73360 |            |     | HDG11      |
| HD-ZIP            | AT2G01430 |            |     | ATHB17     |
| HD-ZIP            | AT2G18550 |            |     | HB-2(HB21) |
| HD-ZIP            | AT2G22430 |            |     | ATHB6      |
| HD-ZIP            | AT2G22800 |            |     | HAT9       |
| HD-ZIP            | AT2G32370 |            |     | HDG3       |
| HD-ZIP            | AT2G44910 |            |     | ATHB4      |
| HD-ZIP            | AT2G46680 |            |     | ATHB-7     |
| HD-ZIP            | AT3G01220 |            |     | ATHB20     |
| HD-ZIP            | AT3G01470 |            |     | ATHB-1     |
| HD-ZIP            | AT3G60390 |            |     | HAT3       |
| HD-ZIP            | AT3G61890 |            |     | ATHB-12    |
| HD-ZIP            | AT4G00730 |            |     | ANL2       |
| HD-ZIP            | AT4G04890 |            |     | PDF2       |
| HD-ZIP            | AT4G16780 |            |     | ATHB-2     |
| HD-ZIP            | AT4G17460 |            |     | HAT1       |
| HD-ZIP            | AT4G21750 |            |     | ATML1      |
| HD-ZIP            | AT4G25530 |            |     | FWA        |
| HD-ZIP            | AT4G32880 |            |     | ATHB-8     |
| HD-ZIP            | AT4G36740 |            |     | HB-5(HB40) |
| HD-ZIP            | AT4G37790 |            |     | HAT22      |
| HD-ZIP            | AT4G40060 |            |     | ATHB16     |
| HD-ZIP            | AT5G06710 |            |     | HAT14      |
| HD-ZIP            | AT5G15150 |            |     | ATHB-3     |
| HD-ZIP            | AT5G46880 |            |     | HB-7       |
| HD-ZIP            | AT5G47370 |            |     | HAT2       |
| HD-ZIP            | AT5G60690 |            |     | REV        |
| HD-ZIP            | AT5G65310 |            |     | ATHB5      |
| HD-ZIP            | AT5G66700 |            |     | HB53       |

c

| TF family members | Gene id   | amiR zf-HD | hbq | Gene name |
|-------------------|-----------|------------|-----|-----------|
| bZIP              | AT4G34000 |            |     | ABF3      |
| bZIP              | AT2G46270 |            |     | GBF3      |
| bZIP              | AT2G36270 |            |     | ABI5      |
| NAC               | AT1G69490 |            |     | NAP       |
