# Supplementary material for: Role of a ZF-HD Transcription Factor in miR157-Mediated Feed-Forward Regulatory Module That Determines Plant Architecture in Arabidopsis
Source: Int J Mol Sci. 2022 Aug 4;23(15):8665. doi: 10.3390/ijms23158665 (PMC9369202; doi:10.3390/ijms23158665)
Supplement: Supplementary file 1 [file ijms-23-08665-s001.zip › Supplementary Table- ijms(0).xlsx]

## Sheet: S1
	Table S1. Sequences of primers used for mutant genotyping, expression analysis of qRT-PCR, and transient assay vector construction
No	Purpose	Gene id	Gene name/Insertion Line	Forward Primer No.	LP	Reverse Primer No.	RP	Genotyping mutant information
1	Genoytping	AT3G28920	HB34 (S150)	AT3G28920LP-619F	CTTCTTCACGACGAAGACGAC	AT3G28920RP-620R	GCAACATTCATCAACCAGAGC	hb34(SALK_085482C)
2	Genoytping	AT1G75240	HB33 (S342)	AT1G75240LP-535F	TGGTGTTGGTGGTTTCTTAGC	AT1G75240RP-536R	GCAAAAACTGGGTTTTTCCTC	hb33(SALK_097388 )
3	Genoytping	AT5G39760	HB23 (S440)	AT5G39760LP-621F	AATCTTTTTGTTTCTTCATCCG	AT5G39760LP-622R	CTCTCAAATGTGCTGCTTGTG	hb23(SALK_059288)
4	Genoytping	AT1G14440	HB31	AT1G14440LP-867F	ATATGCCCATCCCATTAAACACTAC	AT1G14440RP-868R	GTTTAACGAGAGATAGCGAAATGAG	hb31(dspm insertion line)
5	Genoytping	T-DNA	LBb1.3	LBb1.3	ATTTTGCCGATTTCGGAAC
6	Genoytping	T-DNA	dSpm transposon insertion	dspm1	CTTATTTCAGTAAGAGTGTGGGGTTTTGG
7	RT PCR	AT5G39760	HB23	HB23-2249F	GGCGAGATTAATAACCATAACAATG	HB23-2250R	AATGCAAAAACAAACAAAGCTAAAG
8	RT PCR	AT3G28920	HB34	HB34 -RT-2268F	TGGATGCATAATAACAAAAACTCCT	HB34 -RT-2269R	TCCTCCACTATCACTCTCAAATCTC
9	RT PCR	AT1G14440	HB31	AT1G14440-869F	AACTACCGGTACATGCATAACAACT	AT1G14440-870R	TAAGCACTCTTCTCTTCACTCCAAT
10	RT PCR	AT1G75240	HB33	S342-1428RT	AACAAGAACAATGCTAAGAAACCAC	S342-1429RT-R	AAAAAGGCAAACCAAAATTAAAAAC
11	RT PCR	AT5G42780	HB27	HB27-2251F	GGAGGTTGAAGAGTTTTGTGTAGAG	HB27-2252R	AAACTATTGATTACGAAGGTTGTGG
12	RT PCR	AT2G18350	HB24	AT2G18350-1345F	GGAGTGGATCAGTTTCATCATTATC	AT2G18350-1346R	AAAGCAATGTTGAACAAAGAGAAGT
13	RT PCR	AT5G60480	HB26	AT5G60480-1361F	GTTAGGAAGACTGCGATGATTAAGA	AT5G60480-1362R	CCTCCCGTTGTTAAAGTACTTATTG
14	RT PCR	AT3G28917	MIF2	MIF2-2253F	GTTTCCATCGGAGAGAAATAGAAAC	MIF2-2254R	CCACCACCTTCAATCTATAAATCTC
15	RT PCR	AT3G28920	HB34	S150-1426RT-F	GAGAACAGTAACGATGATGGAGTTC	1143R	CATGGAACAGGTAGTTTTCCAGTAG
16	RT PCR	AT3G15270	SPL5	AT3G15270(SPL5)-2272F	AAGAAACAGGGTAGACAGGAAACTT	AT3G15270(SPL5)-2273R	TGACATTGTTAGATGCCATTATTTG
17	RT PCR	At5G50570	SPL13A	AT5G50570-RT-2260F	AACCAGATGCCGATTTGTCTTGTTG	AT5G50570-RT-2261R	GGCAGGACGACCGATATGTTCA
18	RT PCR	AT1G27370	SPL10	SPL10-RT-2262F	GATTCCCCTGAGGCGATTATGGT	SPL10-RT-2263R	ATGTTGCAGTCCATTCAAGATGTGG
19	Taqman assay	amiF	amiRNA	amiRNA Forward-2242F	ATCCAGTGGTGGAAGTTACGG	amiRNA-STEP loopR-2243R	GTTGGCTCTGGTGCAGGGTCCGAGGTATTCGCACCAGAGCCAACCTCCA
20	Taqman assay	AT1G66783	miR157a	amiR-157F	ATCCAGTTGACAGAAGATAGA	miR157aR	GTTGGCTCTGGTGCAGGGTCCGAGGTATTCGCACCAGAGCCAACGTGCTC

## Sheet: S2
Table S2. Expression changes of individual down- or up-regulated TF DEGs
family	id	amiR zf-HD	hbq	HB31SRDX	HB21SRDX	name	description
DBB	AT1G78600	0.147544	0.0225452	-0.0554543	0.474007	LZF1	light-regulated zinc finger protein 1 [Source:TAIR;Acc:AT1G78600]
DBB	AT5G15840	-0.184416	-0.490967	-0.0619351	0.0144916	CO	B-box type zinc finger protein with CCT domain [Source:TAIR;Acc:AT5G15840]
DBB	AT1G75540	0.353317	-0.0171181	0.43063	0.756332	STH2	salt tolerance homolog2 [Source:TAIR;Acc:AT1G75540]
DBB	AT4G38960	-0.989447	-0.817448	-0.997764	-1.20541	AT4G38960	B-box type zinc finger family protein [Source:TAIR;Acc:AT4G38960]
DBB	AT2G21320	-0.709457	-0.344926	-1.13921	-1.09222	AT2G21320	B-box zinc finger family protein [Source:TAIR;Acc:AT2G21320]
DBB	AT4G10240	-1.0276	-0.0681157	-1.2575	-1.2385	AT4G10240	B-box zinc finger family protein [Source:TAIR;Acc:AT4G10240]
DBB	AT2G24790	0.0287327	0.0430826	0.474699	0.582441	COL3	CONSTANS-like 3 [Source:TAIR;Acc:AT2G24790]
DBB	AT2G47890	0.262366	0.289799	0.0189541	0.29786	AT2G47890	B-box type zinc finger protein with CCT domain [Source:TAIR;Acc:AT2G47890]
DBB	AT2G31380	-0.75308	-0.641604	-1.05234	-1.15245	STH	salt tolerance homologue [Source:TAIR;Acc:AT2G31380]
DBB	AT4G39070	0.18115	-0.0355269	0.473769	0.929465	BBX20	B-box zinc finger family protein [Source:TAIR;Acc:AT4G39070]
DBB	AT1G06040	-0.218214	-0.174407	-0.178366	-0.0940781	STO	B-box zinc finger family protein [Source:TAIR;Acc:AT1G06040]
FAR1	AT2G43280	-0.214769	-0.181734	0.225199	0.21941	AT2G43280	Far-red impaired responsive (FAR1) family protein [Source:TAIR;Acc:AT2G43280]
FAR1	AT4G12850	-0.238489	0.13218	-0.0971754	0.0520549	AT4G12850	Far-red impaired responsive (FAR1) family protein [Source:TAIR;Acc:AT4G12850]
FAR1	AT2G27110	0.0750749	0.114301	0.307717	0.310866	FRS3	FAR1-related sequence 3 [Source:TAIR;Acc:AT2G27110]
FAR1	AT1G52520	-0.0424805	0.0904645	0.225011	0.219866	FRS6	FAR1-related sequence 6 [Source:TAIR;Acc:AT1G52520]
FAR1	AT3G59470	0.015292	-0.00330885	0.303246	0.303578	AT3G59470	Far-red impaired responsive (FAR1) family protein [Source:TAIR;Acc:AT3G59470]
FAR1	AT4G19990	-0.0334538	-0.0426033	0.277527	0.249246	FRS1	FAR1-related sequence 1 [Source:TAIR;Acc:AT4G19990]
FAR1	AT1G10240	0.0846841	-0.009356	0.394924	0.335841	FRS11	FAR1-related sequence 11 [Source:TAIR;Acc:AT1G10240]
FAR1	AT3G22170	0.0824747	-0.0161505	0.232822	0.261176	FHY3	far-red elongated hypocotyls 3 [Source:TAIR;Acc:AT3G22170]
FAR1	AT4G38180	0.126318	0.153317	0.24461	0.135776	FRS5	FAR1-related sequence 5 [Source:TAIR;Acc:AT4G38180]
FAR1	AT5G18960	0.171735	0.0370069	0.36874	0.390448	FRS12	FAR1-related sequence 12 [Source:TAIR;Acc:AT5G18960]
FAR1	AT5G28530	0.102215	-0.020826	0.0297777	0.0444081	FRS10	FAR1-related sequence 10 [Source:TAIR;Acc:AT5G28530]
FAR1	AT1G76320	0.206513	0.0893608	0.285862	0.300975	FRS4	FAR1-related sequence 4 [Source:TAIR;Acc:AT1G76320]
FAR1	AT2G32250	0.00421664	0.0128672	-0.287504	-0.223036	FRS2	FAR1-related sequence 2 [Source:TAIR;Acc:AT2G32250]
FAR1	AT3G06250	0.115747	0.0396753	-0.0296638	-0.0266493	FRS7	FAR1-related sequence 7 [Source:TAIR;Acc:AT3G06250]
FAR1	AT1G80010	-0.00903654	0.0963367	0.082175	-0.032582	FRS8	FAR1-related sequence 8 [Source:TAIR;Acc:AT1G80010]
FAR1	AT4G15090	0.161832	0.0273665	0.241897	0.161521	FAR1	FRS (FAR1 Related Sequences) transcription factor family [Source:TAIR;Acc:AT4G15090]
FAR1	AT3G07500	0.459898	0.402505	0.63489	0.642304	AT3G07500	Far-red impaired responsive (FAR1) family protein [Source:TAIR;Acc:AT3G07500]
NF-X1	AT1G10170	-0.0105431	-0.0945408	0.47934	0.344618	ATNFXL1	NF-X-like 1 [Source:TAIR;Acc:AT1G10170]
NF-X1	AT5G05660	-0.206338	-0.0924797	0.143291	-0.144025	ATNFXL2	sequence-specific DNA binding transcription factors;zinc ion binding;sequence-specific DNA binding transcription factors [Source:TAIR;Acc:AT5G05660]
YABBY	AT2G26580	-2.08511	-0.831645	-1.53595	-0.967604	YAB5	plant-specific transcription factor YABBY family protein [Source:TAIR;Acc:AT2G26580]
YABBY	AT1G08465	-0.0932027	0.110303	-0.245129	0.131234	YAB2	Plant-specific transcription factor YABBY family protein [Source:TAIR;Acc:AT1G08465]
YABBY	AT1G23420	-0.257119	-0.18467	0.369334	0.183901	INO	Plant-specific transcription factor YABBY family protein [Source:TAIR;Acc:AT1G23420]
YABBY	AT2G45190	0.496003	0.507717	0.00492239	0.0499216	AFO	Plant-specific transcription factor YABBY family protein [Source:TAIR;Acc:AT2G45190]
YABBY	AT4G00180	0.264614	0.309375	0.000287568	0.196272	YAB3	Plant-specific transcription factor YABBY family protein [Source:TAIR;Acc:AT4G00180]
YABBY	AT1G69180	-0.194784	-0.0422958	-0.335562	-0.239008	CRC	Plant-specific transcription factor YABBY family protein [Source:TAIR;Acc:AT1G69180]
M-type	AT5G58890	-0.361887	-0.310011	0.066711	-0.0579499	AGL82	AGAMOUS-like 82 [Source:TAIR;Acc:AT5G58890]
M-type	AT1G60880	-0.642386	-0.05455	-0.298984	-0.0842394	AGL56	AGAMOUS-like-56 [Source:TAIR;Acc:AT1G60880]
M-type	AT1G28460					AGL59	AGAMOUS-like 59 [Source:TAIR;Acc:AT1G28460]
M-type	AT2G03060	-0.801759	-0.592307	-0.283681	-0.645945	AGL30	AGAMOUS-like 30 [Source:TAIR;Acc:AT2G03060]
M-type	AT1G60920	-0.453594	-0.0537545	-0.304697	0.031052	AGL55	AGAMOUS-like 55 [Source:TAIR;Acc:AT1G60920]
M-type	AT2G34440	-0.806102	-0.738344	-0.364102	-0.551419	AGL29	AGAMOUS-like 29 [Source:TAIR;Acc:AT2G34440]
M-type	AT1G69540	-1.51873	-0.719221	-0.635986	-1.46251	AGL94	AGAMOUS-like 94 [Source:TAIR;Acc:AT1G69540]
M-type	AT1G59810	-0.642386	-0.133611	-0.193814	-0.34486	AGL50	AGAMOUS-like 50 [Source:TAIR;Acc:AT1G59810]
M-type	AT5G27580	0.0868069	0.0752369	-0.420701	-0.398331	AGL89	AGAMOUS-like 89 [Source:TAIR;Acc:AT5G27580]
M-type	AT5G26580					AGL34	AGAMOUS-like-34 [Source:TAIR;Acc:AT5G26580]
M-type	AT4G11250	-0.300713	-0.0550804	-0.109612	-0.279048	AGL52	AGAMOUS-like 52 [Source:TAIR;Acc:AT4G11250]
M-type	AT5G40220	0.00612404	0.161585	-0.10739	-0.26172	AGL43	AGAMOUS-like 43 [Source:TAIR;Acc:AT5G40220]
M-type	AT1G29962	-0.204426	-0.129467	0.066711	0.252305	AGL64	AGAMOUS-like 64 [Source:TAIR;Acc:AT1G29962]
M-type	AT5G04640	-0.429187	0.124619	-0.394533	-0.165331	AGL99	AGAMOUS-like 99 [Source:TAIR;Acc:AT5G04640]
M-type	AT1G48150	0.484571	0.260377	-0.0866508	0.077089	AT1G48150	MADS-box transcription factor family protein [Source:TAIR;Acc:AT1G48150]
M-type	AT3G05860	-0.127325	-0.0792178	-0.12392	-0.117819	AT3G05860	MADS-box transcription factor family protein [Source:TAIR;Acc:AT3G05860]
M-type	AT5G26630	0.341962	0.580193	0.413032	0.400802	AT5G26630	MADS-box transcription factor family protein [Source:TAIR;Acc:AT5G26630]
M-type	AT5G27944					AT5G27944	MADS-box transcription factor family protein [Source:TAIR;Acc:AT5G27944]
M-type	AT5G06500	-5.16556e-05	-0.0625276	-0.00876103	0.134516	AGL96	AGAMOUS-like 96 [Source:TAIR;Acc:AT5G06500]
M-type	AT2G28700	0.110199	0.06156	0.0925513	0.105418	AGL46	AGAMOUS-like 46 [Source:TAIR;Acc:AT2G28700]
M-type	AT1G31630				0.105418	AGL86	AGAMOUS-like 86 [Source:TAIR;Acc:AT1G31630]
M-type	AT5G37415	0.248541	0.378071	0.00208016	-0.0681426	AGL105	AGAMOUS-like 105 [Source:TAIR;Acc:AT5G37415]
M-type	AT5G27070	-0.0801962	-0.0981229	-0.146467	-0.153506	AGL53	AGAMOUS-like 53 [Source:TAIR;Acc:AT5G27070]
M-type	AT5G39750	-0.238275	-0.00970132	-0.262129	-0.358131	EMB3008	AGAMOUS-like 81 [Source:TAIR;Acc:AT5G39750]
M-type	AT5G27050	0.000508258	-0.0625276	-0.00238907	-0.0969405	AGL101	AGAMOUS-like 101 [Source:TAIR;Acc:AT5G27050]
M-type	AT1G65360			0.24527		AGL23	AGAMOUS-like 23 [Source:TAIR;Acc:AT1G65360]
M-type	AT5G55690	0.503872	0.0918793	3.29943	4.11569	AT5G55690	MADS-box transcription factor family protein [Source:TAIR;Acc:AT5G55690]
M-type	AT1G22590	-1.03509	-0.763207	-0.662626	-0.377221	AGL87	AGAMOUS-like 87 [Source:TAIR;Acc:AT1G22590]
M-type	AT3G66656	0.0766891	-0.175534	0.449648	-0.0986951	AGL91	AGAMOUS-like 91 [Source:TAIR;Acc:AT3G66656]
M-type	AT5G38620	0.642963	0.370595	0.257989	0.443923	AT5G38620	MADS-box transcription factor family protein [Source:TAIR;Acc:AT5G38620]
M-type	AT5G40120	0.248188	0.136336	-0.128808	0.0190395	AGL76	AGAMOUS-like 76 [Source:TAIR;Acc:AT5G40120]
M-type	AT5G27810	0.000859881	-0.0782393	-0.0148871	0.205686	AT5G27810	MADS-box transcription factor family protein [Source:TAIR;Acc:AT5G27810]
M-type	AT1G65300	0.00137985	-0.00133682	1.04068	0.383158	PHE2	AGAMOUS-like 38 [Source:TAIR;Acc:AT1G65300]
M-type	AT5G26650			0.5728	0.507728	AGL36	AGAMOUS-like 36 [Source:TAIR;Acc:AT5G26650]
M-type	AT1G54760	-0.400628	-0.145336	-0.229325	-0.20732	AGL85	AGAMOUS-like 85 [Source:TAIR;Acc:AT1G54760]
M-type	AT3G18650	0.10982	0.0606277	0.441175	0.105418	AGL103	AGAMOUS-like 103 [Source:TAIR;Acc:AT3G18650]
M-type	AT5G27090	0.0734378	0.135655	0.0546905	-0.0691342	AGL54	AGAMOUS-like 54 [Source:TAIR;Acc:AT5G27090]
M-type	AT1G72350	-0.22626	-0.00520741	0.0360322	0.0579715	AT1G72350	MADS-box transcription factor family protein [Source:TAIR;Acc:AT1G72350]
M-type	AT5G41200	0.453148	0.367151	0.259199	0.206029	AGL75	AGAMOUS-like 75 [Source:TAIR;Acc:AT5G41200]
M-type	AT1G33070					AT1G33070	MADS-box family protein [Source:TAIR;Acc:AT1G33070]
M-type	AT2G40210					AGL48	AGAMOUS-like 48 [Source:TAIR;Acc:AT2G40210]
M-type	AT1G60040	-5.16556e-05	-0.0625276	0.19942	0.00738977	AGL49	AGAMOUS-like 49 [Source:TAIR;Acc:AT1G60040]
M-type	AT2G26320				0.279341	AGL33	AGAMOUS-like 33 [Source:TAIR;Acc:AT2G26320]
M-type	AT1G47760	0.63675	0.418551	0.0991996	0.56261	AGL102	AGAMOUS-like 102 [Source:TAIR;Acc:AT1G47760]
M-type	AT1G17310	-0.455415	0.0574147	-0.107684	0.0360184	AT1G17310	MADS-box transcription factor family protein [Source:TAIR;Acc:AT1G17310]
M-type	AT1G46408	-0.424648	-0.431264	-0.720814	-0.0982437	AGL97	AGAMOUS-like 97 [Source:TAIR;Acc:AT1G46408]
M-type	AT3G04100	-0.164262	-0.0981229	-0.146467	-0.153506	AGL57	AGAMOUS-like 57 [Source:TAIR;Acc:AT3G04100]
M-type	AT5G27130	-0.0664182	0.149583	-0.176793	-0.288269	AGL39	AGAMOUS-like 39 [Source:TAIR;Acc:AT5G27130]
M-type	AT1G31640					AGL92	AGAMOUS-like 92 [Source:TAIR;Acc:AT1G31640]
M-type	AT2G24840	-0.754369	-0.302836	-0.185453	-0.0250715	AGL61	AGAMOUS-like 61 [Source:TAIR;Acc:AT2G24840]
M-type	AT1G18750	-0.892056	-0.901114	-0.311592	-0.400588	AGL65	AGAMOUS-like 65 [Source:TAIR;Acc:AT1G18750]
M-type	AT1G65330	0.327591	-0.0625276	0.300145	0.426442	PHE1	MADS-box transcription factor family protein [Source:TAIR;Acc:AT1G65330]
M-type	AT4G36590	0.580429	0.338753	-0.18673	0.528684	AT4G36590	MADS-box transcription factor family protein [Source:TAIR;Acc:AT4G36590]
M-type	AT5G48670	-0.350294	0.34281	-0.332137	-0.218632	FEM111	AGAMOUS-like 80 [Source:TAIR;Acc:AT5G48670]
M-type	AT5G26950	0.377105	0.198121	0.281497	-0.0334449	AGL93	AGAMOUS-like 93 [Source:TAIR;Acc:AT5G26950]
M-type	AT5G26880	0.300812	0.24579	0.762754	0.922821	AGL26	AGAMOUS-like 26 [Source:TAIR;Acc:AT5G26880]
M-type	AT5G49420	-0.308738	-0.250271	-0.0600626	-0.719475	AT5G49420	MADS-box transcription factor family protein [Source:TAIR;Acc:AT5G49420]
M-type	AT5G39810	0.245615	0.0950925	-0.141682	0.19754	AGL98	AGAMOUS-like 98 [Source:TAIR;Acc:AT5G39810]
M-type	AT5G65330	0.203709	0.102333	-0.0791068	-0.161437	AGL78	AGAMOUS-like 78 [Source:TAIR;Acc:AT5G65330]
M-type	AT5G38740	0.623422	0.531063	0.323282	0.213649	AGL77	AGAMOUS-like 77 [Source:TAIR;Acc:AT5G38740]
M-type	AT5G60440	-0.154145	-0.215915	0.113581	0.0792459	AGL62	AGAMOUS-like 62 [Source:TAIR;Acc:AT5G60440]
M-type	AT5G27960				0.105418	AGL90	AGAMOUS-like 90 [Source:TAIR;Acc:AT5G27960]
M-type	AT1G28450			0.0878283	0.105418	AGL58	AGAMOUS-like 58 [Source:TAIR;Acc:AT1G28450]
M-type	AT4G02235	-0.164037	-0.049648	-0.146475	-0.0679645	AGL51	AGAMOUS-like 51 [Source:TAIR;Acc:AT4G02235]
M-type	AT1G01530	-0.108956	-0.00133682	0.300119	0.223278	AGL28	AGAMOUS-like 28 [Source:TAIR;Acc:AT1G01530]
M-type	AT5G49490	0.110199			0.104928	AGL83	AGAMOUS-like 83 [Source:TAIR;Acc:AT5G49490]
NZZ/SPL	AT4G27330	0.132109	-0.00533523	0.335363	0.232049	SPL	sporocyteless (SPL) [Source:TAIR;Acc:AT4G27330]
TCP	AT1G69690	0.291492	0.284124	0.191423	0.248735	TCP15	TCP family transcription factor [Source:TAIR;Acc:AT1G69690]
TCP	AT5G51910	0.293459	0.00435863	0.704978	0.548714	TCP19	TCP family transcription factor [Source:TAIR;Acc:AT5G51910]
TCP	AT3G27010	-0.232745	-0.313101	-0.201287	-0.154666	AT-TCP20	TEOSINTE BRANCHED 1, cycloidea, PCF (TCP)-domain family protein 20 [Source:TAIR;Acc:AT3G27010]
TCP	AT5G41030	-0.0688914	0.0469734	0.16129	-0.345273	TCP6	TCP family transcription factor [Source:TAIR;Acc:AT5G41030]
TCP	AT3G18550	-1.00343	-1.37493	1.559	1.30306	BRC1	TCP family transcription factor [Source:TAIR;Acc:AT3G18550]
TCP	AT1G72010	0.290958	0.102782	0.098635	0.233289	TCP22	TCP family transcription factor [Source:TAIR;Acc:AT1G72010]
TCP	AT1G30210	0.17896	0.205819	0.0584996	0.146873	TCP24	TEOSINTE BRANCHED 1, cycloidea, and PCF family 24 [Source:TAIR;Acc:AT1G30210]
TCP	AT1G53230	0.345759	0.333678	-0.333665	-0.086696	TCP3	TEOSINTE BRANCHED 1, cycloidea and PCF transcription factor 3 [Source:TAIR;Acc:AT1G53230]
TCP	AT3G47620	0.617122	0.409586	0.732403	0.846652	AtTCP14	TEOSINTE BRANCHED, cycloidea and PCF (TCP) 14 [Source:TAIR;Acc:AT3G47620]
TCP	AT3G15030	-0.475744	-0.148989	-0.691693	-0.468241	TCP4	TCP family transcription factor 4 [Source:TAIR;Acc:AT3G15030]
TCP	AT1G35560	-0.226169	-0.196419	-0.101644	-0.496297	TCP23	TCP family transcription factor [Source:TAIR;Acc:AT1G35560]
TCP	AT3G02150	-0.107758	0.126047	0.0072368	-0.0300248	PTF1	plastid transcription factor 1 [Source:TAIR;Acc:AT3G02150]
TCP	AT2G45680	-0.0619251	-0.137342	0.0697552	0.0737935	TCP9	TCP family transcription factor [Source:TAIR;Acc:AT2G45680]
TCP	AT5G23280	0.772897	0.586964	0.222486	0.455331	TCP7	TCP family transcription factor [Source:TAIR;Acc:AT5G23280]
TCP	AT4G18390	-0.0978371	0.0573164	-0.245812	-0.135005	TCP2	TEOSINTE BRANCHED 1, cycloidea and PCF transcription factor 2 [Source:TAIR;Acc:AT4G18390]
TCP	AT5G08070	0.690329	0.2495	-0.214914	-0.33931	TCP17	TCP domain protein 17 [Source:TAIR;Acc:AT5G08070]
TCP	AT5G60970	0.968038	0.635927	0.471364	0.617296	TCP5	TEOSINTE BRANCHED 1, cycloidea and PCF transcription factor 5 [Source:TAIR;Acc:AT5G60970]
TCP	AT2G37000	0.419515	0.0910122	0.119217	0.0737662	TCP11	TCP family transcription factor [Source:TAIR;Acc:AT2G37000]
TCP	AT1G67260	1.0721	0.657048	0.440358	0.736377	TCP1	TCP family transcription factor [Source:TAIR;Acc:AT1G67260]
TCP	AT3G45150			0.24527		TCP16	TCP domain protein 16 [Source:TAIR;Acc:AT3G45150]
TCP	AT5G08330	0.468098	-0.077889	0.203367	0.658984	TCP21	TCP family transcription factor [Source:TAIR;Acc:AT5G08330]
TCP	AT1G68800	0.0491091	0.0842762	-0.669835	-0.416748	BRC2	TCP domain protein 12 [Source:TAIR;Acc:AT1G68800]
TCP	AT1G58100	0.491969	0.178456	0.177804	0.483382	TCP8	TCP family transcription factor [Source:TAIR;Acc:AT1G58100]
TCP	AT2G31070	0.709046	0.560659	0.0462624	0.253743	TCP10	TCP domain protein 10 [Source:TAIR;Acc:AT2G31070]
SRS	AT3G54430	0.258428	0.119746	0.0191322	0.0552891	SRS6	SHI-related sequence 6 [Source:TAIR;Acc:AT3G54430]
SRS	AT1G32730	-0.153303	-0.081952	-0.198708	-0.427869	AT1G32730	unknown protein; LOCATED IN: chloroplast;
SRS	AT1G75520	-0.400055	-0.377609	-0.190208	-0.170936	SRS5	SHI-related sequence 5 [Source:TAIR;Acc:AT1G75520]
SRS	AT3G51060	-0.0681816	-0.283045	-0.0214312	-0.318056	STY1	Lateral root primordium (LRP) protein-related [Source:TAIR;Acc:AT3G51060]
SRS	AT5G66350	-0.219973	-0.14116	0.0675169	-0.0793795	SHI	Lateral root primordium (LRP) protein-related [Source:TAIR;Acc:AT5G66350]
SRS	AT5G12330	0.195609	-0.0689394	0.266555	0.0917704	LRP1	Lateral root primordium (LRP) protein-related [Source:TAIR;Acc:AT5G12330]
SRS	AT2G21400	0.00133257	0.161763	0.0623905	0.177988	SRS3	SHI-related sequence3 [Source:TAIR;Acc:AT2G21400]
SRS	AT1G19790	0.232091	0.0289235	0.526431	0.481927	SRS7	SHI-related sequence 7 [Source:TAIR;Acc:AT1G19790]
SRS	AT4G36260	0.418887	0.102605	0.428269	0.413059	STY2	Lateral root primordium (LRP) protein-related [Source:TAIR;Acc:AT4G36260]
SRS	AT2G18120	0.763841	0.468622	-0.802649	-1.06068	SRS4	SHI-related sequence 4 [Source:TAIR;Acc:AT2G18120]
SRS	AT5G33210					SRS8	SHI-related sequence 8 [Source:TAIR;Acc:AT5G33210]
MYB	AT2G26950	0.18071	-0.0981229	0.145156	0.111536	AtMYB104	myb domain protein 104 [Source:TAIR;Acc:AT2G26950]
MYB	AT1G74430	0.413469	0.0744263	0.447237	0.21007	MYB95	myb domain protein 95 [Source:TAIR;Acc:AT1G74430]
MYB	AT1G26780	0.0955051	0.22373	0.0340814	0.0248562	MYB117	myb domain protein 117 [Source:TAIR;Acc:AT1G26780]
MYB	AT1G56650	-0.286085	0.141741	0.47782	0.632	PAP1	production of anthocyanin pigment 1 [Source:TAIR;Acc:AT1G56650]
MYB	AT3G08500	-0.179943	-0.252032	-1.24997	-0.694714	MYB83	myb domain protein 83 [Source:TAIR;Acc:AT3G08500]
MYB	AT3G29020	0.185496	0.176293	0.0654502	-0.169796	MYB110	myb domain protein 110 [Source:TAIR;Acc:AT3G29020]
MYB	AT2G26960	-0.406528	-0.175648	0.395271	-0.337341	AtMYB81	myb domain protein 81 [Source:TAIR;Acc:AT2G26960]
MYB	AT5G06100	-0.364462	-0.252275	0.27644	0.124493	MYB33	myb domain protein 33 [Source:TAIR;Acc:AT5G06100]
MYB	AT3G27810	-2.34178	-1.33354	-1.02365	-0.787333	ATMYB21	myb domain protein 21 [Source:TAIR;Acc:AT3G27810]
MYB	AT5G40350	-2.08366	-1.30308	-1.52384	-0.981268	MYB24	myb domain protein 24 [Source:TAIR;Acc:AT5G40350]
MYB	AT3G02940	0.164737	0.24779	0.443516	0.596953	MYB107	myb domain protein 107 [Source:TAIR;Acc:AT3G02940]
MYB	AT4G37260	0.183405	-0.212161	1.18011	1.20598	MYB73	myb domain protein 73 [Source:TAIR;Acc:AT4G37260]
MYB	AT1G69560	0.840603	0.590765	-0.0161829	-0.206904	MYB105	myb domain protein 105 [Source:TAIR;Acc:AT1G69560]
MYB	AT4G17785					MYB39	myb domain protein 39 [Source:TAIR;Acc:AT4G17785]
MYB	AT5G11050	-0.190732	-0.120332	0.180173	0.542691	MYB64	myb domain protein 64 [Source:TAIR;Acc:AT5G11050]
MYB	AT3G53200	-0.164037	-0.0977177	-0.0802944	-0.0686495	AtMYB27	myb domain protein 27 [Source:TAIR;Acc:AT3G53200]
MYB	AT3G55730	-0.25051	-0.159677	-0.665779	-0.419462	MYB109	myb domain protein 109 [Source:TAIR;Acc:AT3G55730]
MYB	AT1G17950	-0.255849	0.124879	-1.14665	-0.464683	ATMYB52	myb domain protein 52 [Source:TAIR;Acc:AT1G17950]
MYB	AT4G05100	-0.790063	-0.690264	-0.524873	-1.241	AtMYB74	myb domain protein 74 [Source:TAIR;Acc:AT4G05100]
MYB	AT2G47190	-0.720441	-0.293765	0.671455	0.773544	ATMYB2	myb domain protein 2 [Source:TAIR;Acc:AT2G47190]
MYB	AT5G08520	0.11008	0.147837	1.17392	1.28471	AT5G08520	Duplicated homeodomain-like superfamily protein [Source:TAIR;Acc:AT5G08520]
MYB	AT3G09230	-0.0724468	-0.0588803	-0.292333	-0.197481	AtMYB1	myb domain protein 1 [Source:TAIR;Acc:AT3G09230]
MYB	AT5G17800	-0.173783	0.0175125	0.36385	0.161998	AtMYB56	myb domain protein 56 [Source:TAIR;Acc:AT5G17800]
MYB	AT1G57560	-0.389318	-0.112722	-0.764556	-0.536007	AtMYB50	myb domain protein 50 [Source:TAIR;Acc:AT1G57560]
MYB	AT1G49010	-0.252187	-0.201252	0.224882	0.101743	AT1G49010	Duplicated homeodomain-like superfamily protein [Source:TAIR;Acc:AT1G49010]
MYB	AT2G31180	0.942389	0.229221	0.24527	0.499825	ATMYB14	myb domain protein 14 [Source:TAIR;Acc:AT2G31180]
MYB	AT1G22640	-0.808324	-0.37101	-0.188235	-0.0323211	ATMYB3	myb domain protein 3 [Source:TAIR;Acc:AT1G22640]
MYB	AT5G23000	1.20517	0.541558	0.6508	0.194972	RAX1	myb domain protein 37 [Source:TAIR;Acc:AT5G23000]
MYB	AT3G52250	0.156557	0.0840241	0.320499	0.339086	AT3G52250	Duplicated homeodomain-like superfamily protein [Source:TAIR;Acc:AT3G52250]
MYB	AT3G11450	-0.11815	-0.172244	0.791218	0.790257	AT3G11450	DnaJ domain ;Myb-like DNA-binding domain [Source:TAIR;Acc:AT3G11450]
MYB	AT4G28110	-0.130749	-0.169047	-0.261559	-0.258318	AtMYB41	myb domain protein 41 [Source:TAIR;Acc:AT4G28110]
MYB	AT4G13480	-0.108956	0.0751806	-0.0965249	-0.0965112	AtMYB79	myb domain protein 79 [Source:TAIR;Acc:AT4G13480]
MYB	AT1G18710	0.0943917	-0.385728	0.779159	0.0920189	AtMYB47	myb domain protein 47 [Source:TAIR;Acc:AT1G18710]
MYB	AT1G09770	-0.00884387	-0.176572	0.881772	0.8145	ATCDC5	cell division cycle 5 [Source:TAIR;Acc:AT1G09770]
MYB	AT3G11440	-0.313293	-0.410965	-0.285783	-0.23939	ATMYB65	myb domain protein 65 [Source:TAIR;Acc:AT3G11440]
MYB	AT3G12820	0.667057	0.416375	0.410132	0.551428	AtMYB10	myb domain protein 10 [Source:TAIR;Acc:AT3G12820]
MYB	AT5G52260	-0.400628	-0.233335	-0.357217	-0.20732	AtMYB19	myb domain protein 19 [Source:TAIR;Acc:AT5G52260]
MYB	AT1G73410	-0.82556	-0.168711	-1.09716	-0.66141	ATMYB54	myb domain protein 54 [Source:TAIR;Acc:AT1G73410]
MYB	AT3G50060	-0.454753	-0.0405734	0.282216	0.154513	MYB77	myb domain protein 77 [Source:TAIR;Acc:AT3G50060]
MYB	AT1G34670					AtMYB93	myb domain protein 93 [Source:TAIR;Acc:AT1G34670]
MYB	AT4G22680	-0.899219	0.682221	-0.0947114	0.222014	MYB85	myb domain protein 85 [Source:TAIR;Acc:AT4G22680]
MYB	AT5G57620	0.00200613	-0.0558338	0.177983	0.00970804	MYB36	myb domain protein 36 [Source:TAIR;Acc:AT5G57620]
MYB	AT3G12720			0.0925513		ATY53	myb domain protein 67 [Source:TAIR;Acc:AT3G12720]
MYB	AT1G35515	-0.828687	-0.257842	-0.478419	-0.73667	HOS10	high response to osmotic stress 10 [Source:TAIR;Acc:AT1G35515]
MYB	AT1G48000	-1.05786	-0.477424	0.124213	-0.478309	MYB112	myb domain protein 112 [Source:TAIR;Acc:AT1G48000]
MYB	AT5G11510	0.530052	0.352753	-0.233494	-0.232231	MYB3R-4	myb domain protein 3r-4 [Source:TAIR;Acc:AT5G11510]
MYB	AT2G37630	0.661326	0.417926	-0.144618	-0.288748	ATPHAN	myb-like HTH transcriptional regulator family protein [Source:TAIR;Acc:AT2G37630]
MYB	AT3G13540	0.0583898	0.265611	0.188027	1.07108	ATMYB5	myb domain protein 5 [Source:TAIR;Acc:AT3G13540]
MYB	AT4G32730	0.263094	0.242182	-0.0371906	-0.121212	PC-MYB1	Homeodomain-like protein [Source:TAIR;Acc:AT4G32730]
MYB	AT5G58850	-0.853133	-0.315817	-0.28578	-0.809768	ATMYB119	myb domain protein 119 [Source:TAIR;Acc:AT5G58850]
MYB	AT1G63910	-1.00131	-0.49739	-1.6655	-0.781066	AtMYB103	myb domain protein 103 [Source:TAIR;Acc:AT1G63910]
MYB	AT5G10280					MYB92	myb domain protein 92 [Source:TAIR;Acc:AT5G10280]
MYB	AT3G11280	-0.479851	-0.187517	0.17277	0.400983	AT3G11280	Duplicated homeodomain-like superfamily protein [Source:TAIR;Acc:AT3G11280]
MYB	AT3G60460	-1.15138	-0.716564	-0.787539	-0.81603	DUO1	myb-like HTH transcriptional regulator family protein [Source:TAIR;Acc:AT3G60460]
MYB	AT5G49330	-0.494994	-0.333076	-0.490076	-0.218989	MYB111	myb domain protein 111 [Source:TAIR;Acc:AT5G49330]
MYB	AT5G54230	-0.195992	-0.120711	0.385617	0.229025	MYB49	myb domain protein 49 [Source:TAIR;Acc:AT5G54230]
MYB	AT5G04760	-0.652985	-0.376418	0.240853	0.164753	AT5G04760	Duplicated homeodomain-like superfamily protein [Source:TAIR;Acc:AT5G04760]
MYB	AT3G24310	0.259026	0.245214	0.0801769	0.0361471	MYB305	myb domain protein 305 [Source:TAIR;Acc:AT3G24310]
MYB	AT1G66230	0.499041	0.807506	0.4271	0.376159	MYB20	myb domain protein 20 [Source:TAIR;Acc:AT1G66230]
MYB	AT3G06490	-1.95524	-1.25952	-0.537215	-0.112736	MYB108	myb domain protein 108 [Source:TAIR;Acc:AT3G06490]
MYB	AT4G26930	-0.972549	-0.712641	-0.495146	-0.0409764	MYB97	myb domain protein 97 [Source:TAIR;Acc:AT4G26930]
MYB	AT5G62470	-0.836655	-0.515531	-0.288082	-0.209116	MYB96	myb domain protein 96 [Source:TAIR;Acc:AT5G62470]
MYB	AT1G09540	1.08561	0.363939	0.430732	0.859799	MYB61	myb domain protein 61 [Source:TAIR;Acc:AT1G09540]
MYB	AT3G13890	-0.450583	-0.202317	-0.528829	-0.287784	MYB26	myb domain protein 26 [Source:TAIR;Acc:AT3G13890]
MYB	AT3G47600	0.202562	0.104097	0.13979	0.276088	MYB94	myb domain protein 94 [Source:TAIR;Acc:AT3G47600]
MYB	AT1G08810	-0.243919	-0.0237551	-0.132143	-0.0567788	MYB60	myb domain protein 60 [Source:TAIR;Acc:AT1G08810]
MYB	AT1G74080			0.0878283		ATMYB122	myb domain protein 122 [Source:TAIR;Acc:AT1G74080]
MYB	AT2G38090	-0.0247371	0.207361	-0.649197	-0.497711	AT2G38090	Duplicated homeodomain-like superfamily protein [Source:TAIR;Acc:AT2G38090]
MYB	AT2G39880	0.371307	0.167768	-0.0951767	0.0352163	MYB25	myb domain protein 25 [Source:TAIR;Acc:AT2G39880]
MYB	AT4G18770	-0.656244	-0.463941	0.108116	0.610324	MYB98	myb domain protein 98 [Source:TAIR;Acc:AT4G18770]
MYB	AT1G68320	-0.967461	-0.516993	-0.285504	-0.371342	MYB62	myb domain protein 62 [Source:TAIR;Acc:AT1G68320]
MYB	AT4G33450					ATMYB69	myb domain protein 69 [Source:TAIR;Acc:AT4G33450]
MYB	AT5G59780	0.987271	1.12397	0.858245	1.26818	MYB59	myb domain protein 59 [Source:TAIR;Acc:AT5G59780]
MYB	AT3G18100	0.0556398	-0.00633756	0.184023	0.278895	MYB4R1	myb domain protein 4r1 [Source:TAIR;Acc:AT3G18100]
MYB	AT1G79180	0.542939	0.545905	-0.681669	-0.222018	ATMYB63	myb domain protein 63 [Source:TAIR;Acc:AT1G79180]
MYB	AT1G74650	1.3626	0.833097	-1.57912	-1.23806	ATY13	myb domain protein 31 [Source:TAIR;Acc:AT1G74650]
MYB	AT3G30210	-0.130749	-0.169047	-0.261559	-0.258318	ATMYB121	myb domain protein 121 [Source:TAIR;Acc:AT3G30210]
MYB	AT5G07690	1.61668	0.510663	0.539325	0.240986	MYB29	myb domain protein 29 [Source:TAIR;Acc:AT5G07690]
MYB	AT5G14340	0.296375	0.0606277			AtMYB40	myb domain protein 40 [Source:TAIR;Acc:AT5G14340]
MYB	AT3G27785	0.00365039	-0.0606715	-0.050429	0.0195425	MYB118	myb domain protein 118 [Source:TAIR;Acc:AT3G27785]
MYB	AT3G23250	-1.26567	-1.30962	0.458269	0.494618	MYB15	myb domain protein 15 [Source:TAIR;Acc:AT3G23250]
MYB	AT4G00540	-0.781074	-0.497529	0.0304913	-0.806234	ATMYB3R2	myb domain protein 3r2 [Source:TAIR;Acc:AT4G00540]
MYB	AT5G40360	-0.83448	0.299237	-0.715123	-0.362468	MYB115	myb domain protein 115 [Source:TAIR;Acc:AT5G40360]
MYB	AT3G48920	-0.0869885	-0.0334702	0.470596	0.289463	AtMYB45	myb domain protein 45 [Source:TAIR;Acc:AT3G48920]
MYB	AT5G07700	0.110199	0.06156			MYB76	myb domain protein 76 [Source:TAIR;Acc:AT5G07700]
MYB	AT5G40430	0.0811365	-0.00133682	-0.0965249	0.00789338	MYB22	myb domain protein 22 [Source:TAIR;Acc:AT5G40430]
MYB	AT5G60890	1.86209	1.4123	-0.140795	-0.300678	ATMYB34	myb domain protein 34 [Source:TAIR;Acc:AT5G60890]
MYB	AT3G09370	0.112499	0.147655	0.297158	0.187589	MYB3R-3	myb domain protein 3r-3 [Source:TAIR;Acc:AT3G09370]
MYB	AT5G14750	-0.890592	-0.521651	-0.227486	-0.0193408	WER	myb domain protein 66 [Source:TAIR;Acc:AT5G14750]
MYB	AT1G66390	0.520848	0.459075	-2.36177	-2.46329	ATMYB90	myb domain protein 90 [Source:TAIR;Acc:AT1G66390]
MYB	AT2G25230					MYB100	myb domain protein 100 [Source:TAIR;Acc:AT2G25230]
MYB	AT3G28470	1.41391	0.215984	0.307997	-0.111515	ATMYB35	Duplicated homeodomain-like superfamily protein [Source:TAIR;Acc:AT3G28470]
MYB	AT2G36890	0.713934	0.24813	0.631146	0.692305	RAX2	Duplicated homeodomain-like superfamily protein [Source:TAIR;Acc:AT2G36890]
MYB	AT5G61420	0.873903	0.808593	0.174512	0.269082	MYB28	myb domain protein 28 [Source:TAIR;Acc:AT5G61420]
MYB	AT4G12350	-0.790192	-0.242925	-0.664574	-0.477655	MYB42	myb domain protein 42 [Source:TAIR;Acc:AT4G12350]
MYB	AT4G09460	-0.824958	-0.236372	-0.0165042	0.369911	AtMYB6	myb domain protein 6 [Source:TAIR;Acc:AT4G09460]
MYB	AT5G55020	-0.433734	-0.665297	0.588273	0.699294	ATMYB120	myb domain protein 120 [Source:TAIR;Acc:AT5G55020]
MYB	AT1G14350	0.45593	0.319756	-0.242256	-0.00204094	FLP	Duplicated homeodomain-like superfamily protein [Source:TAIR;Acc:AT1G14350]
MYB	AT5G01200	0.22043	0.483365	-0.0436591	-0.0974448	AT5G01200	Duplicated homeodomain-like superfamily protein [Source:TAIR;Acc:AT5G01200]
MYB	AT2G23290	1.13419	0.52113	0.605132	0.983413	AtMYB70	myb domain protein 70 [Source:TAIR;Acc:AT2G23290]
MYB	AT5G05790	-0.315944	0.0506345	-1.13214	-0.656351	AT5G05790	Duplicated homeodomain-like superfamily protein [Source:TAIR;Acc:AT5G05790]
MYB	AT3G28910	-0.722651	-0.459269	-0.395476	-0.268856	ATMYB30	myb domain protein 30 [Source:TAIR;Acc:AT3G28910]
MYB	AT1G16490	0.469948	0.165532	-0.142035	-0.0646128	ATMYB58	myb domain protein 58 [Source:TAIR;Acc:AT1G16490]
MYB	AT5G65790	1.11936	0.539007	-0.31512	-0.0902086	ATMYB68	myb domain protein 68 [Source:TAIR;Acc:AT5G65790]
MYB	AT5G65230	0.189148	-0.0681461	0.242661	-0.117429	AtMYB53	myb domain protein 53 [Source:TAIR;Acc:AT5G65230]
MYB	AT5G35550	1.24554	0.871036	0.0623527	0.756711	TT2	Duplicated homeodomain-like superfamily protein [Source:TAIR;Acc:AT5G35550]
MYB	AT4G25560				0.104928	AtMYB18	myb domain protein 18 [Source:TAIR;Acc:AT4G25560]
MYB	AT1G18570	0.234679	-0.332809	1.11078	1.77231	MYB51	myb domain protein 51 [Source:TAIR;Acc:AT1G18570]
MYB	AT4G34990	-0.460483	-0.0846012	-0.339602	-0.276472	AtMYB32	myb domain protein 32 [Source:TAIR;Acc:AT4G34990]
MYB	AT5G67300	0.373089	0.3042	0.260085	0.628995	ATMYBR1	myb domain protein r1 [Source:TAIR;Acc:AT5G67300]
MYB	AT1G66370	0.573033	0.161374	-0.399371	-0.501717	MYB113	myb domain protein 113 [Source:TAIR;Acc:AT1G66370]
MYB	AT5G23650					AT5G23650	Homeodomain-like transcriptional regulator [Source:TAIR;Acc:AT5G23650]
MYB	AT5G26660	0.666757	0.869376	-0.284989	-0.0361482	ATMYB86	myb domain protein 86 [Source:TAIR;Acc:AT5G26660]
MYB	AT2G16720	-1.3725	-0.992071	-0.341988	-0.422721	MYB7	myb domain protein 7 [Source:TAIR;Acc:AT2G16720]
MYB	AT5G49620	0.00586349	-0.166037	1.02494	0.585392	MYB78	myb domain protein 78 [Source:TAIR;Acc:AT5G49620]
MYB	AT5G16600	0.303302	0.495997	-0.221063	-0.123411	MYB43	myb domain protein 43 [Source:TAIR;Acc:AT5G16600]
MYB	AT3G62610	-0.547797	0.259791	-1.88077	-1.86135	ATMYB11	myb domain protein 11 [Source:TAIR;Acc:AT3G62610]
MYB	AT3G27920	-0.0565495	-0.10143	0.00984886	0.382879	GL1	myb domain protein 0 [Source:TAIR;Acc:AT3G27920]
MYB	AT3G01530	-0.705624	-0.0651634	-2.93942	-1.5665	ATMYB57	myb domain protein 57 [Source:TAIR;Acc:AT3G01530]
MYB	AT5G39700	0.10982				MYB89	myb domain protein 89 [Source:TAIR;Acc:AT5G39700]
MYB	AT2G02820	0.402439	0.232735	-0.392255	-0.374065	MYB88	myb domain protein 88 [Source:TAIR;Acc:AT2G02820]
MYB	AT3G49690	-0.0294026	0.534828	-0.279863	-0.0443309	RAX3	myb domain protein 84 [Source:TAIR;Acc:AT3G49690]
MYB	AT5G15310	-0.0454355	0.0493935	0.146363	0.565493	ATMYB16	myb domain protein 16 [Source:TAIR;Acc:AT5G15310]
MYB	AT5G56110	0.0177756	0.107322	-0.244554	-0.177955	AtMYB103	myb domain protein 103 [Source:TAIR;Acc:AT5G56110]
MYB	AT4G01680	0.520363	0.205077	-0.532007	-0.516276	MYB55	myb domain protein 55 [Source:TAIR;Acc:AT4G01680]
MYB	AT1G06180	0.393948	0.144285	0.5042	0.316627	ATMYB13	myb domain protein 13 [Source:TAIR;Acc:AT1G06180]
MYB	AT4G21440	-1.02554	-0.36527	-0.625234	-1.4905	ATMYB102	MYB-like 102 [Source:TAIR;Acc:AT4G21440]
MYB	AT4G37780	1.23872	0.669825	0.28102	0.221128	MYB87	myb domain protein 87 [Source:TAIR;Acc:AT4G37780]
MYB	AT5G52600	2.28069	0.989452	0.0671551	0.282769	AtMYB82	myb domain protein 82 [Source:TAIR;Acc:AT5G52600]
MYB	AT3G46130	-0.0244194	0.309276	0.00621994	1.33656	ATMYB48-1	myb domain protein 48 [Source:TAIR;Acc:AT3G46130]
MYB	AT5G40330	0.614891	0.496831	0.285974	0.100081	MYB23	myb domain protein 23 [Source:TAIR;Acc:AT5G40330]
MYB	AT5G16770	-0.0336608	0.161545	0.444325	-0.152982	AtMYB9	myb domain protein 9 [Source:TAIR;Acc:AT5G16770]
MYB	AT5G06110	0.0760341	-0.125962	0.590967	0.545739	AT5G06110	DnaJ domain ;Myb-like DNA-binding domain [Source:TAIR;Acc:AT5G06110]
MYB	AT1G25340	-0.712638	-0.198162	0.59095	-0.236481	MYB116	myb domain protein 116 [Source:TAIR;Acc:AT1G25340]
MYB	AT2G32460	-1.05756	-0.785673	-0.247592	-0.105784	MYB101	myb domain protein 101 [Source:TAIR;Acc:AT2G32460]
MYB	AT5G62320	0.59609	0.368521	0.45886	0.537041	MYB99	myb domain protein 99 [Source:TAIR;Acc:AT5G62320]
MYB	AT3G61250	0.431316	0.143111	0.848126	1.06005	AtMYB17	myb domain protein 17 [Source:TAIR;Acc:AT3G61250]
MYB	AT2G47460	-0.68956	-0.276085	-0.873069	-0.733796	MYB12	myb domain protein 12 [Source:TAIR;Acc:AT2G47460]
MYB	AT1G56160				0.104928	ATMYB72	myb domain protein 72 [Source:TAIR;Acc:AT1G56160]
MYB	AT3G01140	-0.726228	-0.38074	-0.751526	-0.684249	MYB106	myb domain protein 106 [Source:TAIR;Acc:AT3G01140]
MYB	AT5G12870	-0.689965	-0.125035	-1.02337	-0.631217	ATMYB46	myb domain protein 46 [Source:TAIR;Acc:AT5G12870]
MYB	AT5G02320	-0.153916	-0.161889	0.51436	0.401659	ATMYB3R5	myb domain protein 3r-5 [Source:TAIR;Acc:AT5G02320]
MYB	AT1G66380	0.0887014	0.268512	-0.423564	0.0268314	MYB114	myb domain protein 114 [Source:TAIR;Acc:AT1G66380]
MYB	AT4G38620	0.176672	0.158195	-0.408423	-0.269344	ATMYB4	myb domain protein 4 [Source:TAIR;Acc:AT4G38620]
ARF	AT1G77850	-0.325848	-0.334697	0.123303	-0.453054	ARF17	auxin response factor 17 [Source:TAIR;Acc:AT1G77850]
ARF	AT5G62000	-0.0876324	-0.184304	0.186767	0.0491394	ARF2	auxin response factor 2 [Source:TAIR;Acc:AT5G62000]
ARF	AT1G19850	0.33706	0.193826	0.189846	-0.0177787	MP	Transcriptional factor B3 family protein / auxin-responsive factor AUX/IAA-related [Source:TAIR;Acc:AT1G19850]
ARF	AT1G35240	0.24493	-0.0018811	-0.0965111	0.0861734	ARF20	auxin response factor 20 [Source:TAIR;Acc:AT1G35240]
ARF	AT5G37020	-0.282969	-0.181573	-0.695713	-0.563961	ARF8	auxin response factor 8 [Source:TAIR;Acc:AT5G37020]
ARF	AT1G59750	0.251939	0.107481	0.39577	0.363098	ARF1	auxin response factor 1 [Source:TAIR;Acc:AT1G59750]
ARF	AT2G33860	0.192715	0.0231423	0.139675	-0.0207233	ETT	Transcriptional factor B3 family protein / auxin-responsive factor AUX/IAA-related [Source:TAIR;Acc:AT2G33860]
ARF	AT2G28350	-0.572247	-0.421809	-0.374288	-0.601568	ARF10	auxin response factor 10 [Source:TAIR;Acc:AT2G28350]
ARF	AT1G19220	0.0587072	0.0184558	0.262274	0.37472	ARF19	auxin response factor 19 [Source:TAIR;Acc:AT1G19220]
ARF	AT4G23980	0.211941	0.214676	0.170786	0.194607	ARF9	auxin response factor 9 [Source:TAIR;Acc:AT4G23980]
ARF	AT1G34310	-0.108956	-0.0620626	-0.00240662	0.0868278	ARF12	auxin response factor 12 [Source:TAIR;Acc:AT1G34310]
ARF	AT5G20730	-0.105316	-0.0822326	0.0244371	0.0219413	NPH4	Transcriptional factor B3 family protein / auxin-responsive factor AUX/IAA-related [Source:TAIR;Acc:AT5G20730]
ARF	AT4G30080	-0.285938	-0.0724625	-0.543079	-0.453671	ARF16	auxin response factor 16 [Source:TAIR;Acc:AT4G30080]
ARF	AT1G34410		0.0606277		0.105418	ARF21	auxin response factor 21 [Source:TAIR;Acc:AT1G34410]
ARF	AT3G61830	0.551591	0.334016	0.284713	0.223887	ARF18	auxin response factor 18 [Source:TAIR;Acc:AT3G61830]
ARF	AT1G34390					ARF22	auxin response factor 22 [Source:TAIR;Acc:AT1G34390]
ARF	AT1G34170					ARF13	AUXIN RESPONSE FACTOR 13 [Source:TAIR;Acc:AT1G34170]
ARF	AT2G46530	0.287246	0.228874	0.439907	0.180684	ARF11	auxin response factor 11 [Source:TAIR;Acc:AT2G46530]
ARF	AT1G35540	-0.984474	-0.732707	-0.402461	-0.552719	ARF14	auxin response factor 14 [Source:TAIR;Acc:AT1G35540]
ARF	AT5G60450	0.473838	0.326575	-0.269235	-0.192438	ARF4	auxin response factor 4 [Source:TAIR;Acc:AT5G60450]
ARF	AT1G30330	0.376564	0.227224	0.304127	0.334178	ARF6	auxin response factor 6 [Source:TAIR;Acc:AT1G30330]
ARF	AT1G35520					ARF15	auxin response factor 15 [Source:TAIR;Acc:AT1G35520]
MYB_related	AT4G39160	-0.0705145	-0.0585027	0.00216385	0.00563913	AT4G39160	Homeodomain-like superfamily protein [Source:TAIR;Acc:AT4G39160]
MYB_related	AT3G46130	-0.0244194	0.309276	0.00621994	1.33656	ATMYB48-1	myb domain protein 48 [Source:TAIR;Acc:AT3G46130]
MYB_related	AT1G74840	-0.366965	-0.210868	0.399999	0.435957	AT1G74840	Homeodomain-like superfamily protein [Source:TAIR;Acc:AT1G74840]
MYB_related	AT5G45420	0.147566	0.101552	-0.388797	-0.311485	AT5G45420	Duplicated homeodomain-like superfamily protein [Source:TAIR;Acc:AT5G45420]
MYB_related	AT4G39250	-0.294472	0.137261	-0.261559	-0.258318	ATRL1	RAD-like 1 [Source:TAIR;Acc:AT4G39250]
MYB_related	AT3G53790	0.0765313	0.0931442	-0.18808	-0.266205	TRFL4	TRF-like 4 [Source:TAIR;Acc:AT3G53790]
MYB_related	AT1G01380	-1.25778	-0.521159	-0.956149	-1.08536	ETC1	Homeodomain-like superfamily protein [Source:TAIR;Acc:AT1G01380]
MYB_related	AT3G10590	-0.513588	-0.0136329	-0.182684	-0.219529	AT3G10590	Duplicated homeodomain-like superfamily protein [Source:TAIR;Acc:AT3G10590]
MYB_related	AT5G61620	-0.0662516	-0.275336	0.967467	0.111009	AT5G61620	myb-like transcription factor family protein [Source:TAIR;Acc:AT5G61620]
MYB_related	AT1G72650	0.0822654	0.112897	0.579646	0.635165	TRFL6	TRF-like 6 [Source:TAIR;Acc:AT1G72650]
MYB_related	AT2G30424	-0.0654876	-0.00511104	0.352876	0.0360184	TCL2	Homeodomain-like superfamily protein [Source:TAIR;Acc:AT2G30424]
MYB_related	AT1G72740	-0.398897	-0.260237	0.0496666	-0.0494785	AT1G72740	Homeodomain-like/winged-helix DNA-binding family protein [Source:TAIR;Acc:AT1G72740]
MYB_related	AT1G15720	-0.0220853	-0.20019	0.377077	0.313272	TRFL5	TRF-like 5 [Source:TAIR;Acc:AT1G15720]
MYB_related	AT1G09710	0.0469928	-0.118109	0.522545	0.258076	AT1G09710	Homeodomain-like superfamily protein [Source:TAIR;Acc:AT1G09710]
MYB_related	AT2G36960	0.0514161	-0.025651	0.248224	0.060903	TKI1	TSL-kinase interacting protein 1 [Source:TAIR;Acc:AT2G36960]
MYB_related	AT2G42150	-0.139994	0.014759	-0.0863709	-0.288776	AT2G42150	DNA-binding bromodomain-containing protein [Source:TAIR;Acc:AT2G42150]
MYB_related	AT1G08810	-0.243919	-0.0237551	-0.132143	-0.0567788	MYB60	myb domain protein 60 [Source:TAIR;Acc:AT1G08810]
MYB_related	AT2G46410	0.194473	0.456677	0.109104	-0.288652	CPC	Homeodomain-like superfamily protein [Source:TAIR;Acc:AT2G46410]
MYB_related	AT3G16350	-0.937108	-0.666368	-0.502924	-0.785891	AT3G16350	Homeodomain-like superfamily protein [Source:TAIR;Acc:AT3G16350]
MYB_related	AT1G71030	-0.0824391	-0.346384	1.92714	2.09667	ATMYBL2	MYB-like 2 [Source:TAIR;Acc:AT1G71030]
MYB_related	AT3G09600	-1.6339	-1.36085	-1.73266	-1.72415	AT3G09600	Homeodomain-like superfamily protein [Source:TAIR;Acc:AT3G09600]
MYB_related	AT5G58900	0.134342	0.10284	-0.0900023	0.184653	AT5G58900	Homeodomain-like transcriptional regulator [Source:TAIR;Acc:AT5G58900]
MYB_related	AT3G57980	0.342867	0.309298	0.210174	0.0782436	AT3G57980	DNA-binding bromodomain-containing protein [Source:TAIR;Acc:AT3G57980]
MYB_related	AT1G70000	0.165917	0.447518	-0.905824	-0.761186	AT1G70000	myb-like transcription factor family protein [Source:TAIR;Acc:AT1G70000]
MYB_related	AT2G18328	-0.207219	0.348321	-1.15625	-1.49501	ATRL4	RAD-like 4 [Source:TAIR;Acc:AT2G18328]
MYB_related	AT1G06910	0.225704	0.249271	-0.0112511	0.0251591	TRFL7	TRF-like 7 [Source:TAIR;Acc:AT1G06910]
MYB_related	AT1G58220	-0.0205377	-0.0289485	0.285691	0.196616	AT1G58220	Homeodomain-like superfamily protein [Source:TAIR;Acc:AT1G58220]
MYB_related	AT2G47210	-0.103423	-0.156253	-0.0870888	-0.120751	AT2G47210	myb-like transcription factor family protein [Source:TAIR;Acc:AT2G47210]
MYB_related	AT1G17460	0.176175	0.166155	0.200641	0.0921562	TRFL3	TRF-like 3 [Source:TAIR;Acc:AT1G17460]
MYB_related	AT5G41020	0.338859	0.250778	0.313246	0.27293	AT5G41020	myb family transcription factor [Source:TAIR;Acc:AT5G41020]
MYB_related	AT3G60110	-0.156648	0.0194839	-0.173143	-0.142807	AT3G60110	DNA-binding bromodomain-containing protein [Source:TAIR;Acc:AT3G60110]
MYB_related	AT2G46830	-1.31204	-1.10876	-1.68305	-1.88191	CCA1	circadian clock associated 1 [Source:TAIR;Acc:AT2G46830]
MYB_related	AT1G01060	-1.82568	-1.60658	-3.36707	-3.30346	LHY	Homeodomain-like superfamily protein [Source:TAIR;Acc:AT1G01060]
MYB_related	AT1G19510	-1.72724	-0.924184	0.463662	-0.53264	ATRL5	RAD-like 5 [Source:TAIR;Acc:AT1G19510]
MYB_related	AT1G18330	-0.143079	-0.0563561	0.954979	0.934474	EPR1	Homeodomain-like superfamily protein [Source:TAIR;Acc:AT1G18330]
MYB_related	AT5G67580	-0.127386	0.0732154	-0.0176851	0.0336415	TRB2	Homeodomain-like/winged-helix DNA-binding family protein [Source:TAIR;Acc:AT5G67580]
MYB_related	AT5G02840	-0.884344	-0.64453	0.488818	0.541965	LCL1	LHY/CCA1-like 1 [Source:TAIR;Acc:AT5G02840]
MYB_related	AT2G30420	0.362175	0.085421	0.505504	-0.153094	ETC2	Homeodomain-like superfamily protein [Source:TAIR;Acc:AT2G30420]
MYB_related	AT5G47390	-0.13979	-0.190151	0.408105	0.289518	AT5G47390	myb-like transcription factor family protein [Source:TAIR;Acc:AT5G47390]
MYB_related	AT3G49850	0.0140739	0.0299836	0.108441	0.0788042	TRB3	telomere repeat binding factor 3 [Source:TAIR;Acc:AT3G49850]
MYB_related	AT1G49950	-0.214266	-0.188138	0.00763469	-0.0691327	TRB1	telomere repeat binding factor 1 [Source:TAIR;Acc:AT1G49950]
MYB_related	AT4G36570	-1.44058	-0.196578	-0.857926	-1.05587	ATRL3	RAD-like 3 [Source:TAIR;Acc:AT4G36570]
MYB_related	AT4G01060	-1.14675	-0.421406	-1.09143	-1.1645	ETC3	CAPRICE-like MYB3 [Source:TAIR;Acc:AT4G01060]
MYB_related	AT4G09450	-0.164092	-0.222937	0.00410232	-0.596474	AT4G09450	Duplicated homeodomain-like superfamily protein [Source:TAIR;Acc:AT4G09450]
MYB_related	AT1G18960	0.60768	0.51006	-0.204366	-0.167169	AT1G18960	myb-like HTH transcriptional regulator family protein [Source:TAIR;Acc:AT1G18960]
MYB_related	AT5G17300	-1.47176	-1.50975	1.01565	0.876433	RVE1	Homeodomain-like superfamily protein [Source:TAIR;Acc:AT5G17300]
MYB_related	AT5G61420	0.873903	0.808593	0.174512	0.269082	MYB28	myb domain protein 28 [Source:TAIR;Acc:AT5G61420]
MYB_related	AT2G30432	-0.00763822	0.296657	-1.52518	-1.31501	TCL1	Homeodomain-like superfamily protein [Source:TAIR;Acc:AT2G30432]
MYB_related	AT3G10580	-0.0396774	0.114502	0.0938558	-0.467232	AT3G10580	Homeodomain-like superfamily protein [Source:TAIR;Acc:AT3G10580]
MYB_related	AT2G13960	-0.176603	-0.259944	0.440816	0.462587	AT2G13960	Homeodomain-like superfamily protein [Source:TAIR;Acc:AT2G13960]
MYB_related	AT1G75250	-1.2541	0.267066	-0.616012	-0.410054	ATRL6	RAD-like 6 [Source:TAIR;Acc:AT1G75250]
MYB_related	AT5G53200	-0.357272	0.134019	-0.166968	0.0369099	TRY	Homeodomain-like superfamily protein [Source:TAIR;Acc:AT5G53200]
MYB_related	AT3G23250	-1.26567	-1.30962	0.458269	0.494618	MYB15	myb domain protein 15 [Source:TAIR;Acc:AT3G23250]
MYB_related	AT2G44430	-0.200157	-0.181296	-0.167957	-0.213848	AT2G44430	DNA-binding bromodomain-containing protein [Source:TAIR;Acc:AT2G44430]
MYB_related	AT1G19000	0.197317	0.147996	0.752748	0.803101	AT1G19000	Homeodomain-like superfamily protein [Source:TAIR;Acc:AT1G19000]
MYB_related	AT5G59780	0.987271	1.12397	0.858245	1.26818	MYB59	myb domain protein 59 [Source:TAIR;Acc:AT5G59780]
MYB_related	AT1G17520	-0.000356858	-0.0630159	0.739891	0.621638	AT1G17520	Homeodomain-like/winged-helix DNA-binding family protein [Source:TAIR;Acc:AT1G17520]
MYB_related	AT4G01280	-0.487865	-0.327104	0.0502327	0.041009	AT4G01280	Homeodomain-like superfamily protein [Source:TAIR;Acc:AT4G01280]
MYB_related	AT3G10113	0.0021148	0.062988	0.257989	0.0843357	AT3G10113	Homeodomain-like superfamily protein [Source:TAIR;Acc:AT3G10113]
MYB_related	AT5G52660	-0.660597	-0.405371	-0.266827	-0.226946	AT5G52660	Homeodomain-like superfamily protein [Source:TAIR;Acc:AT5G52660]
MYB_related	AT3G21430	-0.0327337	-0.0732076	-0.0627086	-0.0180341	ATALY3	DNA binding [Source:TAIR;Acc:AT3G21430]
MYB_related	AT1G01520	-2.07621	-1.44375	-1.67359	-2.07195	ASG4	Homeodomain-like superfamily protein [Source:TAIR;Acc:AT1G01520]
MYB_related	AT1G07540	-1.69122	-0.69067	-0.408818	-1.33779	TRFL2	TRF-like 2 [Source:TAIR;Acc:AT1G07540]
MYB_related	AT5G37260	-2.76297	-2.40998	0.384379	-0.133059	RVE2	Homeodomain-like superfamily protein [Source:TAIR;Acc:AT5G37260]
MYB_related	AT5G56840	0.780478	0.58396	-1.27134	-1.32621	AT5G56840	myb-like transcription factor family protein [Source:TAIR;Acc:AT5G56840]
MYB_related	AT5G58340	-0.375111	-0.301686	0.539915	0.16057	AT5G58340	myb-like HTH transcriptional regulator family protein [Source:TAIR;Acc:AT5G58340]
HSF	AT1G67970	-0.126728	-0.144549	0.808337	0.856529	AT-HSFA8	heat shock transcription factor A8 [Source:TAIR;Acc:AT1G67970]
HSF	AT2G41690	-0.940678	0.00423314	-0.833969	-0.581391	AT-HSFB3	heat shock transcription factor B3 [Source:TAIR;Acc:AT2G41690]
HSF	AT4G17750	-0.0226991	-0.0193199	0.00215155	0.0136338	HSF1	heat shock factor 1 [Source:TAIR;Acc:AT4G17750]
HSF	AT1G77570	0.0850375	-0.0705764	-0.0409592	-0.146649	AT1G77570	Winged helix-turn-helix transcription repressor DNA-binding [Source:TAIR;Acc:AT1G77570]
HSF	AT3G02990	-0.768018	-0.536701	-0.0149258	0.0537189	ATHSFA1E	heat shock transcription factor A1E [Source:TAIR;Acc:AT3G02990]
HSF	AT5G62020	-0.983604	-0.258298	0.0563629	-0.0360578	AT-HSFB2A	heat shock transcription factor B2A [Source:TAIR;Acc:AT5G62020]
HSF	AT5G43840	-1.4514	-0.586903	0.460995	0.148667	AT-HSFA6A	heat shock transcription factor A6A [Source:TAIR;Acc:AT5G43840]
HSF	AT4G18870	0.110199			0.104928	AT4G18870	E2F/DP family winged-helix DNA-binding domain [Source:TAIR;Acc:AT4G18870]
HSF	AT3G24520	-3.38148	-2.23807	-0.332666	-0.751101	AT-HSFC1	heat shock transcription factor C1 [Source:TAIR;Acc:AT3G24520]
HSF	AT3G63350	-0.473295	-0.199047	0.613757	0.575747	AT-HSFA7B	winged-helix DNA-binding transcription factor family protein [Source:TAIR;Acc:AT3G63350]
HSF	AT2G26150	-1.12469	-0.578934	0.0556149	-0.0349826	ATHSFA2	heat shock transcription factor A2 [Source:TAIR;Acc:AT2G26150]
HSF	AT5G45710	-0.264333	-0.326674	0.0178447	-0.00675316	AT-HSFA4C	winged-helix DNA-binding transcription factor family protein [Source:TAIR;Acc:AT5G45710]
HSF	AT5G03720	-0.431271	0.0461415	0.318223	0.639383	AT-HSFA3	heat shock transcription factor A3 [Source:TAIR;Acc:AT5G03720]
HSF	AT1G32330	0.11753	-0.0158037	-0.137822	-0.176919	ATHSFA1D	heat shock transcription factor A1D [Source:TAIR;Acc:AT1G32330]
HSF	AT4G18880	-0.743792	-0.732356	0.643917	0.567777	AT-HSFA4A	heat shock transcription factor A4A [Source:TAIR;Acc:AT4G18880]
HSF	AT4G11660	0.0418366	0.234132	0.0493459	-0.0709706	AT-HSFB2B	winged-helix DNA-binding transcription factor family protein [Source:TAIR;Acc:AT4G11660]
HSF	AT3G51910	1.11543	0.442355	0.714492	1.36867	AT-HSFA7A	heat shock transcription factor A7A [Source:TAIR;Acc:AT3G51910]
HSF	AT5G54070	0.000819922	-0.0620626	0.270075	0.241482	AT-HSFA9	heat shock transcription factor A9 [Source:TAIR;Acc:AT5G54070]
HSF	AT4G13980	-0.398651	-0.355745	0.301858	0.296865	AT-HSFA5	winged-helix DNA-binding transcription factor family protein [Source:TAIR;Acc:AT4G13980]
HSF	AT1G46264	0.347522	0.403679	0.436337	0.421547	AT-HSFB4	heat shock transcription factor B4 [Source:TAIR;Acc:AT1G46264]
HSF	AT5G16820	-0.0147996	0.0463678	0.342125	0.336697	HSF3	heat shock factor 3 [Source:TAIR;Acc:AT5G16820]
HSF	AT4G36990					HSF4	heat shock factor 4 [Source:TAIR;Acc:AT4G36990]
HSF	AT3G22830	-1.98141	-1.43595	1.07111	0.483586	AT-HSFA6B	heat shock transcription factor A6B [Source:TAIR;Acc:AT3G22830]
HSF	AT4G19630	-0.636886	-0.453938	-0.0639567	-0.650303	AT4G19630	winged-helix DNA-binding transcription factor family protein [Source:TAIR;Acc:AT4G19630]
CO-like	AT3G07650	-0.521986	-0.541166	1.39454	1.60341	COL9	CONSTANS-like 9 [Source:TAIR;Acc:AT3G07650]
CO-like	AT5G15840	-0.184416	-0.490967	-0.0619351	0.0144916	CO	B-box type zinc finger protein with CCT domain [Source:TAIR;Acc:AT5G15840]
CO-like	AT3G02380	-0.124817	-0.383999	-0.520656	-0.612363	COL2	CONSTANS-like 2 [Source:TAIR;Acc:AT3G02380]
CO-like	AT1G25440	0.285674	0.159995	0.566005	0.32581	COL16	B-box type zinc finger protein with CCT domain [Source:TAIR;Acc:AT1G25440]
CO-like	AT2G24790	0.0287327	0.0430826	0.474699	0.582441	COL3	CONSTANS-like 3 [Source:TAIR;Acc:AT2G24790]
CO-like	AT3G21880	-1.60695	-0.961367	-0.596337	-1.14119	COL12	B-box type zinc finger protein with CCT domain [Source:TAIR;Acc:AT3G21880]
CO-like	AT5G48250	-0.0312215	-0.159675	0.777839	0.767132	COL10	B-box type zinc finger protein with CCT domain [Source:TAIR;Acc:AT5G48250]
CO-like	AT4G15250	-1.71602	-0.694738	-0.781523	-1.56593	COL11	B-box type zinc finger protein with CCT domain [Source:TAIR;Acc:AT4G15250]
CO-like	AT2G33500	0.0999603	0.0650773	0.71664	0.701171	COL14	B-box type zinc finger protein with CCT domain [Source:TAIR;Acc:AT2G33500]
CO-like	AT1G49130	0.949769	0.212348	1.73135	2.0571	COL8	B-box type zinc finger protein with CCT domain [Source:TAIR;Acc:AT1G49130]
CO-like	AT5G15850	-0.724253	-0.540058	-0.171516	-0.103226	COL1	CONSTANS-like 1 [Source:TAIR;Acc:AT5G15850]
CO-like	AT2G47890	0.262366	0.289799	0.0189541	0.29786	AT2G47890	B-box type zinc finger protein with CCT domain [Source:TAIR;Acc:AT2G47890]
CO-like	AT5G24930	0.0573813	-0.0412555	0.245186	0.233778	ATCOL4	CONSTANS-like 4 [Source:TAIR;Acc:AT5G24930]
CO-like	AT1G68520	0.380769	-0.112096	0.893832	0.813041	COL6	B-box type zinc finger protein with CCT domain [Source:TAIR;Acc:AT1G68520]
CO-like	AT1G28050	-0.274378	-0.222264	0.56779	0.908294	COL15	B-box type zinc finger protein with CCT domain [Source:TAIR;Acc:AT1G28050]
CO-like	AT1G73870	0.40359	-0.183653	1.42559	1.13062	COL7	B-box type zinc finger protein with CCT domain [Source:TAIR;Acc:AT1G73870]
CO-like	AT5G57660	-0.336476	-0.174536	0.764509	0.853449	ATCOL5	CONSTANS-like 5 [Source:TAIR;Acc:AT5G57660]
CAMTA	AT2G22300	0.192704	0.102371	0.423219	0.508698	CAMTA3	signal responsive 1 [Source:TAIR;Acc:AT2G22300]
CAMTA	AT5G09410	-0.0167478	-0.0502609	0.170964	0.191567	EICBP.B	ethylene induced calmodulin binding protein [Source:TAIR;Acc:AT5G09410]
CAMTA	AT4G16150	-0.026359	-0.0334933	0.586472	0.51198	CMTA5	calmodulin binding;transcription regulators [Source:TAIR;Acc:AT4G16150]
CAMTA	AT3G16940	-0.307429	-0.254149	-0.013193	-0.12682	CMTA6	calmodulin binding;transcription regulators [Source:TAIR;Acc:AT3G16940]
CAMTA	AT1G67310	-0.0868979	-0.109851	0.613326	0.510562	CMTA4	Calmodulin-binding transcription activator protein with CG-1 and Ankyrin domains [Source:TAIR;Acc:AT1G67310]
CAMTA	AT5G64220	-0.327506	-0.289798	-0.256605	-0.239742	CMTA2	Calmodulin-binding transcription activator protein with CG-1 and Ankyrin domains [Source:TAIR;Acc:AT5G64220]
MIKC	AT5G15800	0.100745	0.0859067	-0.127053	-0.100157	2016-09-01	K-box region and MADS-box transcription factor family protein [Source:TAIR;Acc:AT5G15800]
MIKC	AT3G54340	0.111646	0.256768	-0.984483	-0.704375	AP3	K-box region and MADS-box transcription factor family protein [Source:TAIR;Acc:AT3G54340]
MIKC	AT2G45660	-0.893216	-0.64767	-0.443736	-0.403759	AGL20	AGAMOUS-like 20 [Source:TAIR;Acc:AT2G45660]
MIKC	AT3G30260					AGL79	AGAMOUS-like 79 [Source:TAIR;Acc:AT3G30260]
MIKC	AT5G65080	-0.108324	-0.0848327	-0.837771	0.533473	MAF5	K-box region and MADS-box transcription factor family protein [Source:TAIR;Acc:AT5G65080]
MIKC	AT2G22630	-0.108956	-0.0620626	0.65989	0.138249	AGL17	AGAMOUS-like 17 [Source:TAIR;Acc:AT2G22630]
MIKC	AT1G26310	-0.32819	0.0180029	-0.212963	0.111622	CAL	K-box region and MADS-box transcription factor family protein [Source:TAIR;Acc:AT1G26310]
MIKC	AT1G31140	-0.0908189	-0.0419	-0.201469	-0.276817	GOA	GORDITA [Source:TAIR;Acc:AT1G31140]
MIKC	AT5G60910	-0.171202	0.0579024	0.0709584	0.207226	AGL8	AGAMOUS-like 8 [Source:TAIR;Acc:AT5G60910]
MIKC	AT1G69120	-0.516806	-0.0603908	-0.224301	0.0210693	AP1	K-box region and MADS-box transcription factor family protein [Source:TAIR;Acc:AT1G69120]
MIKC	AT3G58780	0.118798	0.0126392	0.376358	0.488329	SHP1	K-box region and MADS-box transcription factor family protein [Source:TAIR;Acc:AT3G58780]
MIKC	AT5G65070	0.438029	0.150615	0.598094	0.601143	MAF4	K-box region and MADS-box transcription factor family protein [Source:TAIR;Acc:AT5G65070]
MIKC	AT1G22130	-1.36533	-0.794886	-0.521287	-1.05498	AGL104	AGAMOUS-like 104 [Source:TAIR;Acc:AT1G22130]
MIKC	AT1G77080	0.0575853	0.0674349	-0.00545767	0.10009	MAF1	K-box region and MADS-box transcription factor family protein [Source:TAIR;Acc:AT1G77080]
MIKC	AT5G62165	-0.400058	0.147602	-0.279506	-0.134896	AGL42	AGAMOUS-like 42 [Source:TAIR;Acc:AT5G62165]
MIKC	AT4G22950	-0.092123	0.170567	0.499662	0.199082	AGL19	AGAMOUS-like 19 [Source:TAIR;Acc:AT4G22950]
MIKC	AT4G24540	-1.05929	-0.570917	-0.0845882	-0.0917452	AGL24	AGAMOUS-like 24 [Source:TAIR;Acc:AT4G24540]
MIKC	AT5G51860	0.400772	-0.0038653	-0.0649274	-0.369315	AT5G51860	K-box region and MADS-box transcription factor family protein [Source:TAIR;Acc:AT5G51860]
MIKC	AT3G57230	0.258052	0.109945	-0.123985	0.0196011	AGL16	AGAMOUS-like 16 [Source:TAIR;Acc:AT3G57230]
MIKC	AT2G14210	-0.0424799	0.0660922	0.496458	0.558797	ANR1	AGAMOUS-like 44 [Source:TAIR;Acc:AT2G14210]
MIKC	AT4G37940	-0.610213	-0.376474	-0.67267	-0.531427	AGL21	AGAMOUS-like 21 [Source:TAIR;Acc:AT4G37940]
MIKC	AT4G11880	0.101739	0.0570146	0.321535	0.0148005	AGL14	AGAMOUS-like 14 [Source:TAIR;Acc:AT4G11880]
MIKC	AT2G42830	0.0645243	-0.0175495	-0.128934	-0.109091	SHP2	K-box region and MADS-box transcription factor family protein [Source:TAIR;Acc:AT2G42830]
MIKC	AT5G65060	-0.370417	-0.265318	0.0545224	0.0725319	MAF3	K-box region and MADS-box transcription factor family protein [Source:TAIR;Acc:AT5G65060]
MIKC	AT5G65050	0.101637	0.0481939	0.441635	0.45646	AGL31	AGAMOUS-like 31 [Source:TAIR;Acc:AT5G65050]
MIKC	AT5G23260	-0.830252	-0.457605	0.231615	0.00968577	TT16	K-box region and MADS-box transcription factor family protein [Source:TAIR;Acc:AT5G23260]
MIKC	AT2G22540	0.154257	-0.183674	0.0255133	0.046562	SVP	K-box region and MADS-box transcription factor family protein [Source:TAIR;Acc:AT2G22540]
MIKC	AT3G57390	-0.9026	-0.587838	-0.232309	-0.175764	AGL18	AGAMOUS-like 18 [Source:TAIR;Acc:AT3G57390]
MIKC	AT5G51870	-0.649235	-0.213858	0.165751	-0.261132	AGL71	AGAMOUS-like 71 [Source:TAIR;Acc:AT5G51870]
MIKC	AT1G77950	-0.968961	-0.463873	0.883055	0.104237	AGL67	AGAMOUS-like 67 [Source:TAIR;Acc:AT1G77950]
MIKC	AT4G09960	-0.212674	-0.263285	-0.348627	-0.276583	STK	K-box region and MADS-box transcription factor family protein [Source:TAIR;Acc:AT4G09960]
MIKC	AT1G77980	-1.15701	-0.895875	-0.439158	-0.993673	AGL66	AGAMOUS-like 66 [Source:TAIR;Acc:AT1G77980]
MIKC	AT1G24260	-0.0594456	-0.0365977	-0.0956372	0.117497	2016-09-03	K-box region and MADS-box transcription factor family protein [Source:TAIR;Acc:AT1G24260]
MIKC	AT1G71692	-0.0526222	0.204202	0.272362	0.237047	AGL12	AGAMOUS-like 12 [Source:TAIR;Acc:AT1G71692]
MIKC	AT4G18960	-0.169125	-0.101259	-0.398451	-0.176532	AG	K-box region and MADS-box transcription factor family protein [Source:TAIR;Acc:AT4G18960]
MIKC	AT2G03710	-0.235912	-0.238425	0.186727	0.0906074	2016-09-04	K-box region and MADS-box transcription factor family protein [Source:TAIR;Acc:AT2G03710]
MIKC	AT3G61120	-0.637895	-0.50842	0.00603003	-0.172107	AGL13	AGAMOUS-like 13 [Source:TAIR;Acc:AT3G61120]
MIKC	AT5G20240	-0.179309	0.0541101	-0.378399	-0.162098	PI	K-box region and MADS-box transcription factor family protein [Source:TAIR;Acc:AT5G20240]
MIKC	AT3G02310	0.111208	0.110098	-0.182912	-0.149353	2016-09-02	K-box region and MADS-box transcription factor family protein [Source:TAIR;Acc:AT3G02310]
MIKC	AT5G10140	-0.393648	-0.0801355	0.188206	0.228615	FLC	K-box region and MADS-box transcription factor family protein [Source:TAIR;Acc:AT5G10140]
MIKC	AT2G45650	-0.835169	-0.34959	-0.865744	-0.606456	AGL6	AGAMOUS-like 6 [Source:TAIR;Acc:AT2G45650]
MIKC	AT5G13790	-0.0526263	-0.0505487	-0.238258	-0.223423	AGL15	AGAMOUS-like 15 [Source:TAIR;Acc:AT5G13790]
SBP	AT3G60030	-0.542582	-0.300049	0.0658506	0.170776	SPL12	squamosa promoter-binding protein-like 12 [Source:TAIR;Acc:AT3G60030]
SBP	AT5G18830	-0.209788	-0.162214	-0.116185	-0.266698	SPL7	squamosa promoter binding protein-like 7 [Source:TAIR;Acc:AT5G18830]
SBP	AT1G27360	-0.455174	-0.173964	-0.412225	-0.380638	SPL11	squamosa promoter-like 11 [Source:TAIR;Acc:AT1G27360]
SBP	AT3G15270	-0.213624	-0.348143	-0.45013	0.293647	SPL5	squamosa promoter binding protein-like 5 [Source:TAIR;Acc:AT3G15270]
SBP	AT1G76580	0.532583	0.150606	0.650515	0.779868	SPL16	Squamosa promoter-binding protein-like (SBP domain) transcription factor family protein [Source:TAIR;Acc:AT1G76580]
SBP	AT1G02065	1.17674	0.537358	0.694776	0.688654	SPL8	squamosa promoter binding protein-like 8 [Source:TAIR;Acc:AT1G02065]
SBP	AT3G57920	-0.721323	-0.498673	-0.664575	-0.623209	SPL15	squamosa promoter binding protein-like 15 [Source:TAIR;Acc:AT3G57920]
SBP	AT2G47070	-0.52538	-0.288671	-0.449325	-0.458804	SPL1	squamosa promoter binding protein-like 1 [Source:TAIR;Acc:AT2G47070]
SBP	AT5G43270	0.277027	0.205489	-0.620921	-0.235684	SPL2	squamosa promoter binding protein-like 2 [Source:TAIR;Acc:AT5G43270]
SBP	AT5G50670					SPL13B	Squamosa promoter-binding protein-like (SBP domain) transcription factor family protein [Source:TAIR;Acc:AT5G50670]
SBP	AT5G50570	-1.52516	-0.891344	-0.244063	-0.351224	SPL13A	Squamosa promoter-binding protein-like (SBP domain) transcription factor family protein [Source:TAIR;Acc:AT5G50570]
SBP	AT2G42200	-0.702407	-0.131236	-0.424978	-0.281284	SPL9	squamosa promoter binding protein-like 9 [Source:TAIR;Acc:AT2G42200]
SBP	AT1G20980	-0.140538	-0.0704939	-0.272616	-0.075309	SPL14	squamosa promoter binding protein-like 14 [Source:TAIR;Acc:AT1G20980]
SBP	AT1G69170	-0.253784	-0.242498	0.0628383	0.19648	SPL6	Squamosa promoter-binding protein-like (SBP domain) transcription factor family protein [Source:TAIR;Acc:AT1G69170]
SBP	AT1G27370	-0.602952	-0.425537	-0.765226	-0.545464	SPL10	squamosa promoter binding protein-like 10 [Source:TAIR;Acc:AT1G27370]
SBP	AT1G53160	0.601921	0.409655	0.404179	0.288495	SPL4	squamosa promoter binding protein-like 4 [Source:TAIR;Acc:AT1G53160]
SBP	AT2G33810	-0.0347446	-0.00754771	0.480061	0.641571	SPL3	squamosa promoter binding protein-like 3 [Source:TAIR;Acc:AT2G33810]
ARR-B	AT2G25180	-0.173314	-0.0469165	0.0608527	0.164339	ARR12	response regulator 12 [Source:TAIR;Acc:AT2G25180]
ARR-B	AT4G18020	0.17753	0.0368612	-0.245833	-0.279287	APRR2	CheY-like two-component responsive regulator family protein [Source:TAIR;Acc:AT4G18020]
ARR-B	AT1G68210	0.296375				APRR6	pseudo-response regulator 6 [Source:TAIR;Acc:AT1G68210]
ARR-B	AT4G16110	-0.534997	-0.62364	0.223989	0.00245959	ARR2	response regulator 2 [Source:TAIR;Acc:AT4G16110]
ARR-B	AT3G62670	0.00539071	0.27356	0.0119042	0.302353	ARR20	response regulator 20 [Source:TAIR;Acc:AT3G62670]
ARR-B	AT4G31920	-0.158277	-0.193345	-0.694515	-0.502926	ARR10	response regulator 10 [Source:TAIR;Acc:AT4G31920]
ARR-B	AT1G67710	0.50423	0.110427	0.3104	0.249357	ARR11	response regulator 11 [Source:TAIR;Acc:AT1G67710]
ARR-B	AT2G27070			0.0925513	0.105418	ARR13	response regulator 13 [Source:TAIR;Acc:AT2G27070]
ARR-B	AT5G07210			0.0878283		ARR21	response regulator 21 [Source:TAIR;Acc:AT5G07210]
ARR-B	AT5G58080	-0.241214	-0.261679	-0.239833	-0.257929	ARR18	response regulator 18 [Source:TAIR;Acc:AT5G58080]
ARR-B	AT5G49240	-0.06556	-0.277884	0.22831	-0.383405	APRR4	pseudo-response regulator 4 [Source:TAIR;Acc:AT5G49240]
ARR-B	AT3G16857	0.0879074	-0.202374	0.733166	0.701061	ARR1	response regulator 1 [Source:TAIR;Acc:AT3G16857]
ARR-B	AT1G49190	0.110199			0.104928	ARR19	response regulator 19 [Source:TAIR;Acc:AT1G49190]
ARR-B	AT2G01760	0.330563	0.0808848	0.352135	0.629591	ARR14	response regulator 14 [Source:TAIR;Acc:AT2G01760]
ZF-HD	AT5G39760	-0.655132	-3.13509	-1.00112	-0.921092	AtHB23	homeobox protein 23 [Source:TAIR;Acc:AT5G39760]
ZF-HD	AT5G65410	-0.142861	1.23581	0.881872	0.802846	ATHB25	homeobox protein 25 [Source:TAIR;Acc:AT5G65410]
ZF-HD	AT1G74660	1.45313	0.653982	-0.55444	0.118192	MIF1	mini zinc finger 1 [Source:TAIR;Acc:AT1G74660]
ZF-HD	AT5G15210	0.100669	0.597217	0.164868	0.315277	ATHB30	homeobox protein 30 [Source:TAIR;Acc:AT5G15210]
ZF-HD	AT1G69600	0.14132	0.697116	0.456773	0.331154	ZFHD1	zinc finger homeodomain 1 [Source:TAIR;Acc:AT1G69600]
ZF-HD	AT1G14440	0.895648	-1.7238	0.603125	0.300344	AtHB31	homeobox protein 31 [Source:TAIR;Acc:AT1G14440]
ZF-HD	AT2G02540	0.856082	0.58289	0.380075	1.83928	ATHB21	homeobox protein 21 [Source:TAIR;Acc:AT2G02540]
ZF-HD	AT1G75240	0.636989	-1.69438	0.62034	0.66997	AtHB33	homeobox protein 33 [Source:TAIR;Acc:AT1G75240]
ZF-HD	AT3G28917	-1.46032	-0.641244	-1.22765	-0.375566	MIF2	mini zinc finger 2 [Source:TAIR;Acc:AT3G28917]
ZF-HD	AT5G42780	-1.22889	0.112374	0.0515734	0.188062	AtHB27	homeobox protein 27 [Source:TAIR;Acc:AT5G42780]
ZF-HD	AT3G28920	-0.233661	-2.34884	-0.421516	-0.371997	AtHB34	homeobox protein 34 [Source:TAIR;Acc:AT3G28920]
ZF-HD	AT2G18350	-0.808847	-0.0414309	0.132845	0.445235	AtHB24	homeobox protein 24 [Source:TAIR;Acc:AT2G18350]
ZF-HD	AT1G18835	-0.665746	-0.437192	-0.262129	-0.817378	MIF3	mini zinc finger [Source:TAIR;Acc:AT1G18835]
ZF-HD	AT4G24660	0.578033	0.427302	0.666737	0.779312	ATHB22	homeobox protein 22 [Source:TAIR;Acc:AT4G24660]
ZF-HD	AT3G50890	0.409411	0.426034	-0.373205	-0.29102	AtHB28	homeobox protein 28 [Source:TAIR;Acc:AT3G50890]
ZF-HD	AT5G60480	-0.957289	-0.619759	-0.725957	-0.633345	AtHB26	homeobox protein 26 [Source:TAIR;Acc:AT5G60480]
ZF-HD	AT1G14687	1.06381	0.592728	-0.193687	-0.156113	AtHB32	homeobox protein 32 [Source:TAIR;Acc:AT1G14687]
S1Fa-like	AT3G53370	-0.132858	-0.126303	-0.0801302	-0.302326	S1FA1	S1FA-like DNA-binding protein [Source:TAIR;Acc:AT3G53370]
S1Fa-like	AT3G09735	0.0946729	0.0425359	0.105803	0.29852	S1FA3	S1FA-like DNA-binding protein [Source:TAIR;Acc:AT3G09735]
S1Fa-like	AT2G37120	0.249437	0.135468	0.196004	0.256606	S1FA2	S1FA-like DNA-binding protein [Source:TAIR;Acc:AT2G37120]
GRAS	AT3G54220	0.0282538	-0.139288	0.00913624	0.109016	SCR	GRAS family transcription factor [Source:TAIR;Acc:AT3G54220]
GRAS	AT5G17490	0.0400284	-0.149553	0.87397	0.68608	RGL3	RGA-like protein 3 [Source:TAIR;Acc:AT5G17490]
GRAS	AT1G50420	-0.247875	-0.350483	0.641321	0.520091	SCL3	scarecrow-like 3 [Source:TAIR;Acc:AT1G50420]
GRAS	AT3G13840	-0.246987	-0.579247	-1.07185	-1.0594	SCL29	GRAS family transcription factor [Source:TAIR;Acc:AT3G13840]
GRAS	AT1G07520	-0.45808	-0.343254	0.0959468	-0.0535652	SCL31	GRAS family transcription factor [Source:TAIR;Acc:AT1G07520]
GRAS	AT4G08250	-0.402313	-0.644005	0.0849933	-0.511784	SCL26	GRAS family transcription factor [Source:TAIR;Acc:AT4G08250]
GRAS	AT3G46600	-0.541397	-0.304338	0.946069	1.04112	AT3G46600	GRAS family transcription factor [Source:TAIR;Acc:AT3G46600]
GRAS	AT1G07530	-0.267343	-0.234116	0.653693	0.569827	SCL14	SCARECROW-like 14 [Source:TAIR;Acc:AT1G07530]
GRAS	AT1G55580	0.686394	-0.284025	0.536135	0.789308	LAS	GRAS family transcription factor [Source:TAIR;Acc:AT1G55580]
GRAS	AT2G29060	-0.324597	-0.0464118	0.367574	0.126067	SCL33	GRAS family transcription factor [Source:TAIR;Acc:AT2G29060]
GRAS	AT3G60630	0.0353799	-0.115051	-0.123746	-0.0554987	HAM2	GRAS family transcription factor [Source:TAIR;Acc:AT3G60630]
GRAS	AT4G37650	0.125078	0.101542	-0.103689	-0.208432	SHR	GRAS family transcription factor [Source:TAIR;Acc:AT4G37650]
GRAS	AT3G49950	0.880409	0.0964981	0.195208	-0.0528066	SCL32	GRAS family transcription factor [Source:TAIR;Acc:AT3G49950]
GRAS	AT5G48150	-0.229396	-0.153929	-0.242425	-0.163805	PAT1	GRAS family transcription factor [Source:TAIR;Acc:AT5G48150]
GRAS	AT5G66770	0.217599	0.0343933	-0.523585	-0.555196	SCL4	GRAS family transcription factor [Source:TAIR;Acc:AT5G66770]
GRAS	AT2G45160	-0.0576391	-0.212249	0.218322	0.330437	HAM1	GRAS family transcription factor [Source:TAIR;Acc:AT2G45160]
GRAS	AT1G14920	0.510382	0.237379	0.0509354	0.123703	GAI	GRAS family transcription factor family protein [Source:TAIR;Acc:AT1G14920]
GRAS	AT2G01570	0.221427	0.0105115	0.296377	0.282739	RGA1	GRAS family transcription factor family protein [Source:TAIR;Acc:AT2G01570]
GRAS	AT2G29065	-0.424862	-0.31049	-0.379838	-0.341171	SCL34	GRAS family transcription factor [Source:TAIR;Acc:AT2G29065]
GRAS	AT4G00150	-0.325	-0.196898	-0.0807319	-0.165355	HAM3	GRAS family transcription factor [Source:TAIR;Acc:AT4G00150]
GRAS	AT3G50650	0.226718	0.262507	0.531359	0.792836	SCL7	GRAS family transcription factor [Source:TAIR;Acc:AT3G50650]
GRAS	AT5G67411	0.128352	-0.0018811	0.0594509	0.0855085	SCL16	GRAS family transcription factor [Source:TAIR;Acc:AT5G67411]
GRAS	AT1G66350	0.494848	0.61523	-0.708046	-0.551884	RGL1	RGA-like 1 [Source:TAIR;Acc:AT1G66350]
GRAS	AT5G41920	0.473459	0.430817	0.387659	0.539612	SCL23	GRAS family transcription factor [Source:TAIR;Acc:AT5G41920]
GRAS	AT5G59450	-0.11778	0.0732074	9.48635e-05	-0.0134944	SCL11	GRAS family transcription factor [Source:TAIR;Acc:AT5G59450]
GRAS	AT1G63100	0.515525	0.241112	-0.205139	0.0654367	AT1G63100	GRAS family transcription factor [Source:TAIR;Acc:AT1G63100]
GRAS	AT1G50600	-0.351716	-0.211402	0.25971	0.311815	SCL5	scarecrow-like 5 [Source:TAIR;Acc:AT1G50600]
GRAS	AT4G36710	-0.424888	-0.093457	-0.503262	-0.512081	SCL15	GRAS family transcription factor [Source:TAIR;Acc:AT4G36710]
GRAS	AT5G52510	-0.364982	-0.18348	-0.204282	-0.245819	SCL8	SCARECROW-like 8 [Source:TAIR;Acc:AT5G52510]
GRAS	AT2G04890	0.114687	0.292479	0.888098	0.913245	SCL21	SCARECROW-like 21 [Source:TAIR;Acc:AT2G04890]
GRAS	AT2G37650	0.197804	0.101674	0.200293	0.278644	SCL9	GRAS family transcription factor [Source:TAIR;Acc:AT2G37650]
GRAS	AT4G17230	-1.13599	-0.825419	0.0210049	-0.505291	SCL13	SCARECROW-like 13 [Source:TAIR;Acc:AT4G17230]
GRAS	AT3G03450	-0.0232185	0.206044	-0.190152	-0.225508	RGL2	RGA-like 2 [Source:TAIR;Acc:AT3G03450]
GRAS	AT1G21450	-0.235601	-0.15031	0.792236	0.662908	SCL1	SCARECROW-like 1 [Source:TAIR;Acc:AT1G21450]
E2F/DP	AT2G36010	0.204033	-0.0611146	-0.318746	-0.393726	E2F3	E2F transcription factor 3 [Source:TAIR;Acc:AT2G36010]
E2F/DP	AT5G14960	-0.18309	0.0534799	0.675889	0.794062	DEL2	DP-E2F-like 2 [Source:TAIR;Acc:AT5G14960]
E2F/DP	AT1G47870	-0.10388	-0.303508	-0.485037	-0.445152	ATE2F2	winged-helix DNA-binding transcription factor family protein [Source:TAIR;Acc:AT1G47870]
E2F/DP	AT3G48160	0.143454	0.0434001	-0.422497	-0.416815	DEL1	DP-E2F-like 1 [Source:TAIR;Acc:AT3G48160]
E2F/DP	AT3G01330	-0.1629	-0.173455	-0.165563	-0.150929	DEL3	DP-E2F-like protein 3 [Source:TAIR;Acc:AT3G01330]
E2F/DP	AT5G22220	-0.127499	-0.279648	-0.124861	-0.257552	E2F1	E2F transcription factor 1 [Source:TAIR;Acc:AT5G22220]
E2F/DP	AT5G02470	-0.146306	-0.0422878	-0.17726	-0.243919	DPA	Transcription factor DP [Source:TAIR;Acc:AT5G02470]
E2F/DP	AT5G03415	-0.0353174	-0.17161	0.0948113	0.184937	DPB	Transcription factor DP [Source:TAIR;Acc:AT5G03415]
NF-YB	AT5G23090	-0.0400048	-0.00472889	0.0593378	0.0723596	NF-YB13	nuclear factor Y, subunit B13 [Source:TAIR;Acc:AT5G23090]
NF-YB	AT2G37060	0.180481	-0.084415	0.0535414	0.0410004	NF-YB8	nuclear factor Y, subunit B8 [Source:TAIR;Acc:AT2G37060]
NF-YB	AT1G21970	0.10982	0.06156	0.136079	0.38159	LEC1	Histone superfamily protein [Source:TAIR;Acc:AT1G21970]
NF-YB	AT4G14540	0.0284109	-0.131588	-0.0363761	0.0945719	NF-YB3	nuclear factor Y, subunit B3 [Source:TAIR;Acc:AT4G14540]
NF-YB	AT2G47810	-0.266547	-0.121197	-0.974319	-0.796294	NF-YB5	nuclear factor Y, subunit B5 [Source:TAIR;Acc:AT2G47810]
NF-YB	AT2G13570	-1.4657	-0.689082	-0.607956	-1.10792	NF-YB7	nuclear factor Y, subunit B7 [Source:TAIR;Acc:AT2G13570]
NF-YB	AT3G53340	0.0717325	-0.0215214	0.106859	0.0970437	NF-YB10	nuclear factor Y, subunit B10 [Source:TAIR;Acc:AT3G53340]
NF-YB	AT2G27470	0.145646	-0.098162	-0.149673	-0.173018	NF-YB11	nuclear factor Y, subunit B11 [Source:TAIR;Acc:AT2G27470]
NF-YB	AT2G38880	-0.0341562	-0.0670751	0.130739	0.145731	NF-YB1	nuclear factor Y, subunit B1 [Source:TAIR;Acc:AT2G38880]
NF-YB	AT5G47640	-0.526272	-0.234954	-0.634085	-0.831074	NF-YB2	nuclear factor Y, subunit B2 [Source:TAIR;Acc:AT5G47640]
NF-YB	AT5G08190	-0.0279422	-0.0157434	0.0485474	0.0329846	NF-YB12	nuclear factor Y, subunit B12 [Source:TAIR;Acc:AT5G08190]
NF-YB	AT5G47670	-0.448947	-0.409773	0.0113135	-0.703094	NF-YB6	nuclear factor Y, subunit B6 [Source:TAIR;Acc:AT5G47670]
NF-YB	AT1G09030					NF-YB4	nuclear factor Y, subunit B4 [Source:TAIR;Acc:AT1G09030]
HB-other	AT3G18380	-0.0179399	-0.0118911	-0.0112474	-0.0499121	AT3G18380	sequence-specific DNA binding transcription factors;sequence-specific DNA binding [Source:TAIR;Acc:AT3G18380]
HB-other	AT1G28420	0.0559559	0.0593559	0.0161627	0.00780071	HB-1	homeobox-1 [Source:TAIR;Acc:AT1G28420]
HB-other	AT4G03250	0.025022	0.131437	0.169876	0.293346	AT4G03250	Homeodomain-like superfamily protein [Source:TAIR;Acc:AT4G03250]
HB-other	AT5G44180	0.230164	0.0637792	0.269217	0.23512	AT5G44180	Homeodomain-like transcriptional regulator [Source:TAIR;Acc:AT5G44180]
HB-other	AT5G11270	0.305006	0.208779	0.286261	0.249312	OCP3	overexpressor of cationic peroxidase 3 [Source:TAIR;Acc:AT5G11270]
HB-other	AT4G02560	0.0330207	0.00924708	0.0333675	-0.0690515	LD	Homeodomain-like superfamily protein [Source:TAIR;Acc:AT4G02560]
HB-other	AT4G12750	0.467546	0.291842	0.790097	0.802273	AT4G12750	Homeodomain-like transcriptional regulator [Source:TAIR;Acc:AT4G12750]
NAC	AT1G52890	-2.55917	-1.15627	0.420364	0.545065	ANAC019	NAC domain containing protein 19 [Source:TAIR;Acc:AT1G52890]
NAC	AT1G77450	-1.02771	-0.361481	-1.05978	-1.71601	anac032	NAC domain containing protein 32 [Source:TAIR;Acc:AT1G77450]
NAC	AT3G56530	0.993089	0.234655	0.0899493	-0.018023	anac064	NAC domain containing protein 64 [Source:TAIR;Acc:AT3G56530]
NAC	AT5G04400	0.0737238	-0.231186	-0.114793	0.124487	anac077	NAC domain containing protein 77 [Source:TAIR;Acc:AT5G04400]
NAC	AT5G22380	0.00285884	-0.124162	-0.106255	0.0284422	anac090	NAC domain containing protein 90 [Source:TAIR;Acc:AT5G22380]
NAC	AT5G07680	-1.19357	-0.271756	-0.931315	-0.597645	ANAC080	NAC domain containing protein 80 [Source:TAIR;Acc:AT5G07680]
NAC	AT5G18037		0.0606277			AT5G18037	NAC (No Apical Meristem) domain transcriptional regulator superfamily protein [Source:TAIR;Acc:AT5G18037]
NAC	AT5G14000	0.202889	0.0768833	0.411107	0.320875	anac084	NAC domain containing protein 84 [Source:TAIR;Acc:AT5G14000]
NAC	AT5G64060	-0.969128	-0.795348	-0.45216	-0.995755	anac103	NAC domain containing protein 103 [Source:TAIR;Acc:AT5G64060]
NAC	AT5G18270	-0.569805	-0.0941103	0.321006	-0.0312831	ANAC087	Arabidopsis NAC domain containing protein 87 [Source:TAIR;Acc:AT5G18270]
NAC	AT4G35580	0.0216237	0.111256	0.0605371	0.107766	NTL9	NAC transcription factor-like 9 [Source:TAIR;Acc:AT4G35580]
NAC	AT4G01550	-0.246002	-0.093816	-0.0890633	0.0664593	anac069	NAC domain containing protein 69 [Source:TAIR;Acc:AT4G01550]
NAC	AT5G41090	-0.265566	-0.1532	0.451751	0.0873062	anac095	NAC domain containing protein 95 [Source:TAIR;Acc:AT5G41090]
NAC	AT5G39690	-0.177881	-0.111185	0.47128	-0.283728	ANAC093	NAC domain containing protein 93 [Source:TAIR;Acc:AT5G39690]
NAC	AT1G28470	-0.606675	0.0415315	-0.742472	-0.297632	ANAC010	NAC domain containing protein 10 [Source:TAIR;Acc:AT1G28470]
NAC	AT3G44350	-0.554524	-0.234224	-0.381627	-0.386556	anac061	NAC domain containing protein 61 [Source:TAIR;Acc:AT3G44350]
NAC	AT3G01600	0.663317	-0.0418011	0.0558845	0.0749798	anac044	NAC domain containing protein 44 [Source:TAIR;Acc:AT3G01600]
NAC	AT5G22290	-0.640455	-0.448954	0.061735	-0.17245	anac089	NAC domain containing protein 89 [Source:TAIR;Acc:AT5G22290]
NAC	AT1G26870	-0.108956	-0.0620626	0.199396	0.241265	FEZ	NAC (No Apical Meristem) domain transcriptional regulator superfamily protein [Source:TAIR;Acc:AT1G26870]
NAC	AT5G18300	-1.03123	-0.572903	-0.823281	-0.475038	anac088	NAC domain containing protein 88 [Source:TAIR;Acc:AT5G18300]
NAC	AT5G08790	-0.256436	-0.0665255	0.196922	0.307633	ATAF2	NAC (No Apical Meristem) domain transcriptional regulator superfamily protein [Source:TAIR;Acc:AT5G08790]
NAC	AT3G12977	0.110199	0.165971	0.441175	0.105418	AT3G12977	NAC (No Apical Meristem) domain transcriptional regulator superfamily protein [Source:TAIR;Acc:AT3G12977]
NAC	AT4G27410	-1.04225	-0.363741	-0.259273	-0.428139	RD26	NAC (No Apical Meristem) domain transcriptional regulator superfamily protein [Source:TAIR;Acc:AT4G27410]
NAC	AT1G64100	0.0654535	0.125531	-0.222253	-0.368834	AT1G64100	pentatricopeptide (PPR) repeat-containing protein [Source:TAIR;Acc:AT1G64100]
NAC	AT3G10500	-0.365323	-0.177402	0.225958	0.0453894	anac053	NAC domain containing protein 53 [Source:TAIR;Acc:AT3G10500]
NAC	AT3G15500	-2.05939	-0.58409	1.43868	1.90491	ATNAC3	NAC domain containing protein 3 [Source:TAIR;Acc:AT3G15500]
NAC	AT2G46770	-0.214824	-0.0622253	-1.19721	-0.907419	NST1	NAC (No Apical Meristem) domain transcriptional regulator superfamily protein [Source:TAIR;Acc:AT2G46770]
NAC	AT1G12260	-0.797987	0.065605	-0.756221	-0.450929	VND4	NAC 007 [Source:TAIR;Acc:AT1G12260]
NAC	AT3G56560	-0.51511	-0.288134	0.630045	-0.329287	anac065	NAC domain containing protein 65 [Source:TAIR;Acc:AT3G56560]
NAC	AT4G36160	-0.609851	-0.318578	-0.518167	-0.38884	ANAC076	NAC domain containing protein 76 [Source:TAIR;Acc:AT4G36160]
NAC	AT3G44290	-0.512435	-0.342026	0.500443	0.104855	anac060	NAC domain containing protein 60 [Source:TAIR;Acc:AT3G44290]
NAC	AT1G01720	-0.563522	-0.26508	-0.182136	-0.421455	ATAF1	NAC (No Apical Meristem) domain transcriptional regulator superfamily protein [Source:TAIR;Acc:AT1G01720]
NAC	AT3G03200	-0.580062	-0.292984	-0.453232	-0.483071	anac045	NAC domain containing protein 45 [Source:TAIR;Acc:AT3G03200]
NAC	AT4G29230	-0.131361	-0.18172	0.134573	0.161762	anac075	NAC domain containing protein 75 [Source:TAIR;Acc:AT4G29230]
NAC	AT1G34190	-0.250056	-0.137973	-0.0346968	-0.0417822	anac017	NAC domain containing protein 17 [Source:TAIR;Acc:AT1G34190]
NAC	AT2G33480	-0.611397	-0.350951	-0.141829	0.0693516	ANAC041	NAC domain containing protein 41 [Source:TAIR;Acc:AT2G33480]
NAC	AT5G53950	1.22669	0.370464	0.434992	0.120063	CUC2	NAC (No Apical Meristem) domain transcriptional regulator superfamily protein [Source:TAIR;Acc:AT5G53950]
NAC	AT1G60350	0.359913	0.29252	0.123812	0.659612	anac024	NAC domain containing protein 24 [Source:TAIR;Acc:AT1G60350]
NAC	AT2G27300	-0.334056	-0.108444	-0.495837	-0.627078	ANAC040	NTM1-like 8 [Source:TAIR;Acc:AT2G27300]
NAC	AT1G52880	-0.376374	0.0909071	-0.820414	-0.425059	NAM	NAC (No Apical Meristem) domain transcriptional regulator superfamily protein [Source:TAIR;Acc:AT1G52880]
NAC	AT1G65910	-0.156544	-0.136257	-0.313536	-0.365231	anac028	NAC domain containing protein 28 [Source:TAIR;Acc:AT1G65910]
NAC	AT1G54330	-0.552322	0.0677938	-0.551279	-0.184304	ANAC020	NAC domain containing protein 20 [Source:TAIR;Acc:AT1G54330]
NAC	AT1G33060	-0.292027	-0.526631	0.579056	0.441665	ANAC014	NAC 014 [Source:TAIR;Acc:AT1G33060]
NAC	AT1G60240	-0.864426	-0.563754	-0.667512	-0.555315	AT1G60240	NAC (No Apical Meristem) domain transcriptional regulator superfamily protein [Source:TAIR;Acc:AT1G60240]
NAC	AT5G56620	0.00557124	0.212997	-0.0501022	-0.388683	anac099	NAC domain containing protein 99 [Source:TAIR;Acc:AT5G56620]
NAC	AT1G19040	-0.949665	-0.687514	-0.555176	-0.566311	AT1G19040	NAC (No Apical Meristem) domain transcriptional regulator superfamily protein [Source:TAIR;Acc:AT1G19040]
NAC	AT3G04060	-1.53012	-0.537751	0.747998	0.656209	anac046	NAC domain containing protein 46 [Source:TAIR;Acc:AT3G04060]
NAC	AT1G60380	-0.0811028	-0.321216	0.039627	-0.518739	AT1G60380	NAC (No Apical Meristem) domain transcriptional regulator superfamily protein [Source:TAIR;Acc:AT1G60380]
NAC	AT3G49530	-1.38207	-0.913957	-0.106549	-0.520991	ANAC062	NAC domain containing protein 62 [Source:TAIR;Acc:AT3G49530]
NAC	AT3G04420	-0.530618	-0.47023	-0.446311	-0.507803	anac048	NAC domain containing protein 48 [Source:TAIR;Acc:AT3G04420]
NAC	AT4G10350					ANAC070	NAC domain containing protein 70 [Source:TAIR;Acc:AT4G10350]
NAC	AT3G04430		0.06156			anac049	NAC domain containing protein 49 [Source:TAIR;Acc:AT3G04430]
NAC	AT2G43000	-0.464074	-0.287027	0.206013	0.713528	anac042	NAC domain containing protein 42 [Source:TAIR;Acc:AT2G43000]
NAC	AT5G64530	-1.30727	-0.559482	-0.51303	-0.615281	ANAC104	xylem NAC domain 1 [Source:TAIR;Acc:AT5G64530]
NAC	AT5G24590	-1.12903	-0.771742	0.0884738	-0.242297	ANAC091	TCV-interacting protein [Source:TAIR;Acc:AT5G24590]
NAC	AT3G04410	-0.400628	-0.146927	-0.127908	-0.20732	AT3G04410	NAC (No Apical Meristem) domain transcriptional regulator superfamily protein [Source:TAIR;Acc:AT3G04410]
NAC	AT1G60280	0.165079	0.406355	0.5728	0.279341	ANAC023	NAC domain containing protein 23 [Source:TAIR;Acc:AT1G60280]
NAC	AT1G32870	-0.186132	-0.152668	-0.0595808	-0.160659	ANAC13	NAC domain protein 13 [Source:TAIR;Acc:AT1G32870]
NAC	AT3G17730	0.266337	0.426817	-0.11359	-0.247003	anac057	NAC domain containing protein 57 [Source:TAIR;Acc:AT3G17730]
NAC	AT3G18400	-0.610685	-0.081242	-0.376013	-0.550069	anac058	NAC domain containing protein 58 [Source:TAIR;Acc:AT3G18400]
NAC	AT1G01010	-0.429641	-0.0276981	-0.0279502	0.148352	ANAC001	NAC domain containing protein 1 [Source:TAIR;Acc:AT1G01010]
NAC	AT1G32510	0.807644	0.111239	-0.691445	-0.654502	ANAC011	NAC domain containing protein 11 [Source:TAIR;Acc:AT1G32510]
NAC	AT5G39820	-0.980801	-0.22266	-0.680149	-0.818008	anac094	NAC domain containing protein 94 [Source:TAIR;Acc:AT5G39820]
NAC	AT3G56520					AT3G56520	NAC (No Apical Meristem) domain transcriptional regulator superfamily protein [Source:TAIR;Acc:AT3G56520]
NAC	AT1G02230	-0.475959	0.0578343	0.816027	0.777598	ANAC004	NAC domain containing protein 4 [Source:TAIR;Acc:AT1G02230]
NAC	AT1G25580	0.225336	-0.0408838	0.19889	0.253019	SOG1	NAC (No Apical Meristem) domain transcriptional regulator superfamily protein [Source:TAIR;Acc:AT1G25580]
NAC	AT1G71930	-0.222011	-0.105865	-0.735564	-0.266384	VND7	vascular related NAC-domain protein 7 [Source:TAIR;Acc:AT1G71930]
NAC	AT4G17980	-0.405078	-0.133611	-0.596759	-0.12597	anac071	NAC domain containing protein 71 [Source:TAIR;Acc:AT4G17980]
NAC	AT1G34180	-0.431647	-0.47352	0.355999	-0.310466	anac016	NAC domain containing protein 16 [Source:TAIR;Acc:AT1G34180]
NAC	AT1G62700	-0.654761	-0.289352	-0.0718363	-0.0545015	VND5	Arabidopsis NAC domain containing protein 26 [Source:TAIR;Acc:AT1G62700]
NAC	AT5G04410	-0.232718	-0.0932645	-0.0121001	-0.0308222	NAC2	NAC domain containing protein 2 [Source:TAIR;Acc:AT5G04410]
NAC	AT1G02220	-0.659015	0.191427	0.608319	0.779669	ANAC003	NAC domain containing protein 3 [Source:TAIR;Acc:AT1G02220]
NAC	AT1G76420	0.661998	0.565366	0.112928	-0.115471	CUC3	NAC (No Apical Meristem) domain transcriptional regulator superfamily protein [Source:TAIR;Acc:AT1G76420]
NAC	AT4G28530	-0.835812	-0.306424	-0.447995	-0.278493	anac074	NAC domain containing protein 74 [Source:TAIR;Acc:AT4G28530]
NAC	AT1G02210					AT1G02210	NAC (No Apical Meristem) domain transcriptional regulator superfamily protein [Source:TAIR;Acc:AT1G02210]
NAC	AT1G02250	-0.429216	-0.396115	-0.175547	-0.119272	anac005	NAC domain containing protein 5 [Source:TAIR;Acc:AT1G02250]
NAC	AT5G46590	-0.592885	-0.647527	-0.290226	-0.582671	anac096	NAC domain containing protein 96 [Source:TAIR;Acc:AT5G46590]
NAC	AT2G18060	0.0504838	0.271265	-0.399544	0.212092	VND1	vascular related NAC-domain protein 1 [Source:TAIR;Acc:AT2G18060]
NAC	AT4G28500	-0.671191	-0.0802689	-1.21141	-0.51653	ANAC073	NAC domain containing protein 73 [Source:TAIR;Acc:AT4G28500]
NAC	AT3G10480	0.120825	0.123244	0.0432983	0.0330387	ANAC050	NAC domain containing protein 50 [Source:TAIR;Acc:AT3G10480]
NAC	AT1G60300	0.32299	0.162868	0.0563748	0.388889	AT1G60300	NAC (No Apical Meristem) domain transcriptional regulator superfamily protein [Source:TAIR;Acc:AT1G60300]
NAC	AT3G10490	0.101884	0.030796	0.23161	0.209226	ANAC052	NAC domain containing protein 52 [Source:TAIR;Acc:AT3G10490]
NAC	AT3G12910	0.00450585	-0.231042	0.20923	0.0444709	AT3G12910	NAC (No Apical Meristem) domain transcriptional regulator superfamily protein [Source:TAIR;Acc:AT3G12910]
NAC	AT5G09330	-0.214108	-0.260344	0.00325909	-0.0721085	VNI1	NAC domain containing protein 82 [Source:TAIR;Acc:AT5G09330]
NAC	AT4G01540	-0.329197	-0.396303	0.0800904	0.026487	ANAC068	NAC with transmembrane motif1 [Source:TAIR;Acc:AT4G01540]
NAC	AT4G01520	-0.294472	-0.0782393	-0.261559	-0.258318	anac067	NAC domain containing protein 67 [Source:TAIR;Acc:AT4G01520]
NAC	AT1G32770	0.528043	0.165971			ANAC012	NAC domain containing protein 12 [Source:TAIR;Acc:AT1G32770]
NAC	AT5G63790	-0.500748	-0.234681	-0.176775	-0.173561	ANAC102	NAC domain containing protein 102 [Source:TAIR;Acc:AT5G63790]
NAC	AT5G17260	-0.77863	-0.39659	-0.0941956	-0.434975	anac086	NAC domain containing protein 86 [Source:TAIR;Acc:AT5G17260]
NAC	AT5G13180	0.0915633	0.258522	-0.0126719	-0.00587289	ANAC083	NAC domain containing protein 83 [Source:TAIR;Acc:AT5G13180]
NAC	AT2G24430	-0.0885425	-0.121001	-0.123905	-0.0691342	ANAC039	NAC domain containing protein 38 [Source:TAIR;Acc:AT2G24430]
NAC	AT5G66300	-1.69609	-0.591176	-0.419541	-0.975198	ANAC105	NAC domain containing protein 105 [Source:TAIR;Acc:AT5G66300]
NAC	AT5G50820	-0.0573542	0.390117	-0.978546	-0.543139	anac097	NAC domain containing protein 97 [Source:TAIR;Acc:AT5G50820]
NAC	AT1G03490	-0.360278	-0.0108245	0.324111	-0.0771793	ANAC006	NAC domain containing protein 6 [Source:TAIR;Acc:AT1G03490]
NAC	AT1G33280	0.10982				ANAC015	NAC domain containing protein 15 [Source:TAIR;Acc:AT1G33280]
NAC	AT5G62380	-0.070321	0.306204	-0.211936	-0.168945	VND6	NAC-domain protein 101 [Source:TAIR;Acc:AT5G62380]
NAC	AT5G39610	-1.59788	-1.02001	0.499842	0.10915	ATNAC2	NAC domain containing protein 6 [Source:TAIR;Acc:AT5G39610]
NAC	AT1G61110	-0.218079	0.0895554	-0.453737	-0.326525	anac025	NAC domain containing protein 25 [Source:TAIR;Acc:AT1G61110]
NAC	AT3G55210	0.0968109	0.41961	0.394985	0.363769	anac063	NAC domain containing protein 63 [Source:TAIR;Acc:AT3G55210]
NAC	AT3G61910	-0.191098	0.0563357	-1.09437	-1.14467	NST2	NAC domain protein 66 [Source:TAIR;Acc:AT3G61910]
NAC	AT2G02450	-0.00539571	0.206688	0.281191	0.193797	ANAC034	NAC domain containing protein 35 [Source:TAIR;Acc:AT2G02450]
NAC	AT5G14490			0.0878283	0.105418	anac085	NAC domain containing protein 85 [Source:TAIR;Acc:AT5G14490]
NAC	AT3G15170	1.114	0.500587	0.424566	0.336961	CUC1	NAC (No Apical Meristem) domain transcriptional regulator superfamily protein [Source:TAIR;Acc:AT3G15170]
NAC	AT3G15510	-0.240513	0.11975	-0.690394	-0.3637	ATNAC2	NAC domain containing protein 2 [Source:TAIR;Acc:AT3G15510]
NAC	AT3G04070	-1.11035	-1.34407	1.32065	0.916127	anac047	NAC domain containing protein 47 [Source:TAIR;Acc:AT3G04070]
NAC	AT1G79580		0.0606277			SMB	NAC (No Apical Meristem) domain transcriptional regulator superfamily protein [Source:TAIR;Acc:AT1G79580]
NAC	AT1G69490	-1.577	-0.918014	0.474869	0.207847	NAP	NAC-like, activated by AP3/PI [Source:TAIR;Acc:AT1G69490]
NAC	AT5G61430	-0.782371	-0.032911	-0.953114	-0.411496	ANAC100	NAC domain containing protein 100 [Source:TAIR;Acc:AT5G61430]
NAC	AT2G17040	0.128447	-0.354397	-0.203351	0.155886	anac036	NAC domain containing protein 36 [Source:TAIR;Acc:AT2G17040]
NAC	AT1G60340	0.495651	0.332763	0.423316	0.474973	AT1G60340	NAC (No Apical Meristem) domain transcriptional regulator superfamily protein [Source:TAIR;Acc:AT1G60340]
NAC	AT3G29035	0.494657	0.176596	0.486277	1.00628	ATNAC3	NAC domain containing protein 3 [Source:TAIR;Acc:AT3G29035]
NAC	AT1G64105					ANAC027	NAC domain containing protein 27 [Source:TAIR;Acc:AT1G64105]
NAC	AT1G56010	-0.326469	0.148848	0.286653	0.138641	NAC1	NAC domain containing protein 1 [Source:TAIR;Acc:AT1G56010]
BES1	AT5G45300	0.184325	0.15395	0.0395069	-0.0227227	BMY2	beta-amylase 2 [Source:TAIR;Acc:AT5G45300]
BES1	AT3G50750	-0.193078	-0.280448	-0.216323	-0.332975	BEH1	BES1/BZR1 homolog 1 [Source:TAIR;Acc:AT3G50750]
BES1	AT1G19350	-0.196647	-0.184045	-0.0792722	0.115989	BES1	Brassinosteroid signalling positive regulator (BZR1) family protein [Source:TAIR;Acc:AT1G19350]
BES1	AT4G36780	-0.0575387	-0.1752	0.316804	0.333071	BEH2	BES1/BZR1 homolog 2 [Source:TAIR;Acc:AT4G36780]
BES1	AT4G18890	-0.0822934	-0.0879519	-0.314677	-0.426729	BEH3	BES1/BZR1 homolog 3 [Source:TAIR;Acc:AT4G18890]
BES1	AT1G78700	-0.189993	-0.091811	0.0488974	0.017955	BEH4	BES1/BZR1 homolog 4 [Source:TAIR;Acc:AT1G78700]
BES1	AT1G75080	0.151014	0.0203419	-0.0327732	0.0954288	BZR1	Brassinosteroid signalling positive regulator (BZR1) family protein [Source:TAIR;Acc:AT1G75080]
BES1	AT2G45880	0.0830015	-0.0125526	0.400094	0.261178	BMY4	beta-amylase 7 [Source:TAIR;Acc:AT2G45880]
STAT	AT1G78540	-0.0399681	-0.0375435	-0.0213643	-0.212722	SHB	SH2 domain protein B [Source:TAIR;Acc:AT1G78540]
STAT	AT1G17040	-0.0493254	0.0183252	0.0908504	-0.00579841	SHA	SH2 domain protein A [Source:TAIR;Acc:AT1G17040]
C3H	AT2G32930	-0.784883	-0.416578	-0.620009	-0.808469	ZFN2	zinc finger nuclease 2 [Source:TAIR;Acc:AT2G32930]
C3H	AT1G03790	-0.669639	-0.14708	0.315325	0.927306	SOM	Zinc finger C-x8-C-x5-C-x3-H type family protein [Source:TAIR;Acc:AT1G03790]
C3H	AT5G49200	-0.211839	-0.099027	-0.328343	-0.567644	ZFWD4	WD-40 repeat family protein / zfwd4 protein (ZFWD4) [Source:TAIR;Acc:AT5G49200]
C3H	AT2G20280	0.0556206	0.0575536	0.20301	0.160498	AT2G20280	Zinc finger C-x8-C-x5-C-x3-H type family protein [Source:TAIR;Acc:AT2G20280]
C3H	AT1G10320	0.0533113	-0.0353644	0.196912	0.137563	AT1G10320	Zinc finger C-x8-C-x5-C-x3-H type family protein [Source:TAIR;Acc:AT1G10320]
C3H	AT2G28450	0.0958183	0.0185763	0.962488	1.022	AT2G28450	zinc finger (CCCH-type) family protein [Source:TAIR;Acc:AT2G28450]
C3H	AT5G40880	-0.271806	-0.253646	-0.188312	-0.323919	AT5G40880	WD-40 repeat family protein / zfwd3 protein (ZFWD3) [Source:TAIR;Acc:AT5G40880]
C3H	AT5G51980	-0.180641	-0.15343	0.0099421	-0.0767851	ZFWD2	Transducin/WD40 repeat-like superfamily protein [Source:TAIR;Acc:AT5G51980]
C3H	AT1G68200	0.559756	0.505222	0.401722	0.161569	AT1G68200	Zinc finger C-x8-C-x5-C-x3-H type family protein [Source:TAIR;Acc:AT1G68200]
C3H	AT5G18550	-0.454815	-0.187744	-0.435647	-0.62249	AT5G18550	Zinc finger C-x8-C-x5-C-x3-H type family protein [Source:TAIR;Acc:AT5G18550]
C3H	AT3G02830	-0.570662	-0.41379	-0.499756	-0.70406	ZFN1	zinc finger protein 1 [Source:TAIR;Acc:AT3G02830]
C3H	AT3G51120	0.0489144	0.0232482	0.136437	0.0346209	AT3G51120	DNA binding;zinc ion binding;nucleic acid binding;nucleic acid binding [Source:TAIR;Acc:AT3G51120]
C3H	AT2G47850	0.014423	-0.0387435	0.313169	0.216553	AT2G47850	Zinc finger C-x8-C-x5-C-x3-H type family protein [Source:TAIR;Acc:AT2G47850]
C3H	AT2G19810	-0.357944	-0.494297	0.66416	0.372117	AT2G19810	CCCH-type zinc finger family protein [Source:TAIR;Acc:AT2G19810]
C3H	AT1G04990	-0.415431	-0.0356399	9.92415e-05	-0.063551	AT1G04990	Zinc finger C-x8-C-x5-C-x3-H type family protein [Source:TAIR;Acc:AT1G04990]
C3H	AT5G07500	0.188693	0.384952	0.723831	0.0608831	PEI1	Zinc finger C-x8-C-x5-C-x3-H type family protein [Source:TAIR;Acc:AT5G07500]
C3H	AT3G44785	0.10982				AT3G44785	Zinc finger C-x8-C-x5-C-x3-H type family protein [Source:TAIR;Acc:AT3G44785]
C3H	AT5G16540	-0.711793	-0.593989	-0.390492	-0.28742	ZFN3	zinc finger nuclease 3 [Source:TAIR;Acc:AT5G16540]
C3H	AT4G29190	-0.907624	-0.893602	0.923549	0.496465	AT4G29190	Zinc finger C-x8-C-x5-C-x3-H type family protein [Source:TAIR;Acc:AT4G29190]
C3H	AT1G29600	-0.559817	0.0274412	0.0953041	0.109523	AT1G29600	Zinc finger C-x8-C-x5-C-x3-H type family protein [Source:TAIR;Acc:AT1G29600]
C3H	AT5G58620	-0.437083	-0.406151	-0.28224	-0.459486	AT5G58620	zinc finger (CCCH-type) family protein [Source:TAIR;Acc:AT5G58620]
C3H	AT2G24830	-0.0907884	-0.00427198	0.302783	0.350019	AT2G24830	zinc finger (CCCH-type) family protein / D111/G-patch domain-containing protein [Source:TAIR;Acc:AT2G24830]
C3H	AT2G16485	0.16046	0.0832059	0.163737	0.0296011	NERD	nucleic acid binding;zinc ion binding;DNA binding [Source:TAIR;Acc:AT2G16485]
C3H	AT5G06770	0.0760904	-0.00720147	-0.165327	-0.134765	AT5G06770	KH domain-containing protein / zinc finger (CCCH type) family protein [Source:TAIR;Acc:AT5G06770]
C3H	AT1G66810	-0.295977	-0.100891	-0.866424	-0.591299	AT1G66810	Zinc finger C-x8-C-x5-C-x3-H type family protein [Source:TAIR;Acc:AT1G66810]
C3H	AT5G26749	-0.0507238	0.0201234	0.213948	0.208892	AT5G26749	C2H2 and C2HC zinc fingers superfamily protein [Source:TAIR;Acc:AT5G26749]
C3H	AT1G48195	-0.705625	-0.318347	-0.234479	-0.103972	AT1G48195	Zinc finger C-x8-C-x5-C-x3-H type family protein [Source:TAIR;Acc:AT1G48195]
C3H	AT1G75340	0.0956672	0.0418725	0.0847603	0.0116515	AT1G75340	Zinc finger C-x8-C-x5-C-x3-H type family protein [Source:TAIR;Acc:AT1G75340]
C3H	AT1G29560	0.132957	0.0152667	0.0851923	-0.216143	AT1G29560	Zinc finger C-x8-C-x5-C-x3-H type family protein [Source:TAIR;Acc:AT1G29560]
C3H	AT3G12680	0.0404433	-0.0919358	-0.111487	-0.233122	HUA1	floral homeotic protein (HUA1) [Source:TAIR;Acc:AT3G12680]
C3H	AT2G25900	-0.16099	-0.519554	1.27622	1.16796	ATCTH	Zinc finger C-x8-C-x5-C-x3-H type family protein [Source:TAIR;Acc:AT2G25900]
C3H	AT2G40140	-2.08056	-1.22729	0.638857	0.392505	CZF1	zinc finger (CCCH-type) family protein [Source:TAIR;Acc:AT2G40140]
C3H	AT3G06410	-0.298891	-0.134511	-0.150568	-0.262731	AT3G06410	Zinc finger C-x8-C-x5-C-x3-H type family protein [Source:TAIR;Acc:AT3G06410]
C3H	AT3G19360	-0.0645036	-0.0378004	-0.131304	-0.33892	AT3G19360	Zinc finger (CCCH-type) family protein [Source:TAIR;Acc:AT3G19360]
C3H	AT1G29570	0.4156	0.26801	0.163523	0.158464	AT1G29570	Zinc finger C-x8-C-x5-C-x3-H type family protein [Source:TAIR;Acc:AT1G29570]
C3H	AT2G35430	0.0461242	-0.270776	0.611425	0.559732	AT2G35430	Zinc finger C-x8-C-x5-C-x3-H type family protein [Source:TAIR;Acc:AT2G35430]
C3H	AT2G41900	-0.0965921	-0.082407	-0.0353648	-0.0570402	AT2G41900	CCCH-type zinc finger protein with ARM repeat domain [Source:TAIR;Acc:AT2G41900]
C3H	AT3G48440	-0.139419	-0.071078	-0.280043	-0.396764	AT3G48440	Zinc finger C-x8-C-x5-C-x3-H type family protein [Source:TAIR;Acc:AT3G48440]
C3H	AT5G44260	-1.02444	-0.611709	0.223678	0.505093	AT5G44260	Zinc finger C-x8-C-x5-C-x3-H type family protein [Source:TAIR;Acc:AT5G44260]
C3H	AT5G06420	0.37153	0.189988	0.60078	0.501058	AT5G06420	Zinc finger (CCCH-type/C3HC4-type RING finger) family protein [Source:TAIR;Acc:AT5G06420]
C3H	AT2G33835	0.259547	0.320146	0.386758	0.47753	FES1	Zinc finger C-x8-C-x5-C-x3-H type family protein [Source:TAIR;Acc:AT2G33835]
C3H	AT3G12130	0.0106264	-0.0577353	0.172788	0.207366	AT3G12130	KH domain-containing protein / zinc finger (CCCH type) family protein [Source:TAIR;Acc:AT3G12130]
C3H	AT3G21810	0.00695441	-0.00687613	0.0414765	0.0667585	AT3G21810	Zinc finger C-x8-C-x5-C-x3-H type family protein [Source:TAIR;Acc:AT3G21810]
C3H	AT5G63260	-0.100505	-0.107616	0.235801	0.105768	AT5G63260	Zinc finger C-x8-C-x5-C-x3-H type family protein [Source:TAIR;Acc:AT5G63260]
C3H	AT1G32360	-0.181707	-0.231312	0.365894	0.334993	AT1G32360	Zinc finger (CCCH-type) family protein [Source:TAIR;Acc:AT1G32360]
C3H	AT3G55980	-3.33722	-1.94132	0.587977	0.207258	SZF1	salt-inducible zinc finger 1 [Source:TAIR;Acc:AT3G55980]
C3H	AT3G08505	-0.782607	-0.525105	-0.209084	-0.541809	MKRN	zinc finger (CCCH-type/C3HC4-type RING finger) family protein [Source:TAIR;Acc:AT3G08505]
C3H	AT1G01350	-0.172696	-0.0877671	0.18383	0.183827	AT1G01350	Zinc finger (CCCH-type/C3HC4-type RING finger) family protein [Source:TAIR;Acc:AT1G01350]
C3H	AT4G25440	-0.0579126	0.09712	0.301142	0.198603	ZFWD1	zinc finger WD40 repeat protein 1 [Source:TAIR;Acc:AT4G25440]
C3H	AT5G12850	0.0692688	0.0760144	-0.0295625	-0.0212262	AT5G12850	CCCH-type zinc finger protein with ARM repeat domain [Source:TAIR;Acc:AT5G12850]
HD-ZIP	AT1G26960	0.23287	0.368356	-0.418305	-0.0814032	AtHB23	homeobox protein 23 [Source:TAIR;Acc:AT1G26960]
HD-ZIP	AT2G22430	-0.0349522	-0.0242755	0.242642	0.182618	ATHB6	homeobox protein 6 [Source:TAIR;Acc:AT2G22430]
HD-ZIP	AT1G05230	0.174635	0.130469	0.133352	0.195716	HDG2	homeodomain GLABROUS 2 [Source:TAIR;Acc:AT1G05230]
HD-ZIP	AT3G60390	0.573792	0.187385	0.612592	0.485337	HAT3	homeobox-leucine zipper protein 3 [Source:TAIR;Acc:AT3G60390]
HD-ZIP	AT4G17460	0.564497	0.315312	-0.0313574	0.30658	HAT1	Homeobox-leucine zipper protein 4 (HB-4) / HD-ZIP protein [Source:TAIR;Acc:AT4G17460]
HD-ZIP	AT4G32880	0.244263	0.205699	-0.440844	-0.325563	ATHB-8	homeobox gene 8 [Source:TAIR;Acc:AT4G32880]
HD-ZIP	AT4G25530	-1.08728	-0.450779	0.068654	0.327438	FWA	FLOWERING WAGENINGEN [Source:TAIR;Acc:AT4G25530]
HD-ZIP	AT1G73360	0.705541	0.160872	0.0604072	0.090552	HDG11	homeodomain GLABROUS 11 [Source:TAIR;Acc:AT1G73360]
HD-ZIP	AT3G01220	-1.23588	-0.67783	-0.471254	-0.39542	ATHB20	homeobox protein 20 [Source:TAIR;Acc:AT3G01220]
HD-ZIP	AT1G70920	-0.952911	-0.376694	-0.103875	0.0830512	ATHB18	homeobox-leucine zipper protein 18 [Source:TAIR;Acc:AT1G70920]
HD-ZIP	AT5G47370	-0.355328	-0.528387	0.543879	0.415124	HAT2	Homeobox-leucine zipper protein 4 (HB-4) / HD-ZIP protein [Source:TAIR;Acc:AT5G47370]
HD-ZIP	AT5G66700	-1.17416	-0.95301	0.768135	0.516163	HB53	homeobox 53 [Source:TAIR;Acc:AT5G66700]
HD-ZIP	AT2G22800	-1.10953	-0.52543	-0.583832	-0.496804	HAT9	Homeobox-leucine zipper protein family [Source:TAIR;Acc:AT2G22800]
HD-ZIP	AT4G21750	0.18313	0.0323667	0.271906	0.189715	ATML1	Homeobox-leucine zipper family protein / lipid-binding START domain-containing protein [Source:TAIR;Acc:AT4G21750]
HD-ZIP	AT2G46680	-1.18907	-0.516625	-0.143283	-0.511487	ATHB-7	homeobox 7 [Source:TAIR;Acc:AT2G46680]
HD-ZIP	AT5G65310	0.136507	0.181445	0.266905	0.397411	ATHB5	homeobox protein 5 [Source:TAIR;Acc:AT5G65310]
HD-ZIP	AT5G17320	-0.456281	-0.00344892	-0.330087	-0.0656156	HDG9	homeodomain GLABROUS 9 [Source:TAIR;Acc:AT5G17320]
HD-ZIP	AT4G36740	-1.14738	-1.01653	1.56365	0.914073	HB-5	homeobox protein 40 [Source:TAIR;Acc:AT4G36740]
HD-ZIP	AT3G01470	-1.25131	-0.578281	-0.819338	-0.276295	ATHB-1	homeobox 1 [Source:TAIR;Acc:AT3G01470]
HD-ZIP	AT5G60690	0.429436	0.295285	0.0442769	0.0293732	REV	Homeobox-leucine zipper family protein / lipid-binding START domain-containing protein [Source:TAIR;Acc:AT5G60690]
HD-ZIP	AT2G36610	-0.324444	-0.071703	-0.162157	-0.051809	ATHB22	homeobox protein 22 [Source:TAIR;Acc:AT2G36610]
HD-ZIP	AT3G03260	0.165218			0.38159	HDG8	homeodomain GLABROUS 8 [Source:TAIR;Acc:AT3G03260]
HD-ZIP	AT1G34650	0.0740605	0.0953855	-0.123905	0.0888466	HDG10	homeodomain GLABROUS 10 [Source:TAIR;Acc:AT1G34650]
HD-ZIP	AT3G61890	-1.35884	-0.813972	-0.209879	-0.600455	ATHB-12	homeobox 12 [Source:TAIR;Acc:AT3G61890]
HD-ZIP	AT4G04890	0.211359	0.148906	0.318434	0.303529	PDF2	protodermal factor 2 [Source:TAIR;Acc:AT4G04890]
HD-ZIP	AT5G06710	-0.37361	-0.0920429	-0.291573	-0.0188768	HAT14	homeobox from Arabidopsis thaliana [Source:TAIR;Acc:AT5G06710]
HD-ZIP	AT2G18550	-0.696653	-0.913719	1.49561	0.710957	HB-2	homeobox protein 21 [Source:TAIR;Acc:AT2G18550]
HD-ZIP	AT5G15150	-0.747351	-0.235526	-0.0509217	0.192924	ATHB-3	homeobox 3 [Source:TAIR;Acc:AT5G15150]
HD-ZIP	AT2G32370	0.00236147	-0.00393506	-0.022079	0.921058	HDG3	homeodomain GLABROUS 3 [Source:TAIR;Acc:AT2G32370]
HD-ZIP	AT1G17920	-0.523255	-0.4215	-0.0783535	-0.180689	HDG12	homeodomain GLABROUS 12 [Source:TAIR;Acc:AT1G17920]
HD-ZIP	AT5G46880	0.0977891	-0.217428	0.433698	0.288286	HB-7	homeobox-7 [Source:TAIR;Acc:AT5G46880]
HD-ZIP	AT3G61150	0.204211	0.100945	0.21218	0.148052	HDG1	homeodomain GLABROUS 1 [Source:TAIR;Acc:AT3G61150]
HD-ZIP	AT5G53980	0.577405	0.165971	0.24527	0.105418	ATHB52	homeobox protein 52 [Source:TAIR;Acc:AT5G53980]
HD-ZIP	AT2G34710	0.0879911	-0.14122	0.114831	-0.075203	PHB	Homeobox-leucine zipper family protein / lipid-binding START domain-containing protein [Source:TAIR;Acc:AT2G34710]
HD-ZIP	AT1G30490	0.522281	0.27521	-0.0790097	-0.231834	PHV	Homeobox-leucine zipper family protein / lipid-binding START domain-containing protein [Source:TAIR;Acc:AT1G30490]
HD-ZIP	AT1G69780	0.380554	0.235577	-0.199616	0.0361968	ATHB13	Homeobox-leucine zipper protein family [Source:TAIR;Acc:AT1G69780]
HD-ZIP	AT2G01430	-0.837001	-0.564438	0.657543	0.780838	ATHB17	homeobox-leucine zipper protein 17 [Source:TAIR;Acc:AT2G01430]
HD-ZIP	AT4G37790	-0.421233	-0.186682	-0.524774	-0.476846	HAT22	Homeobox-leucine zipper protein family [Source:TAIR;Acc:AT4G37790]
HD-ZIP	AT2G44910	0.577092	0.325752	0.903896	0.469894	ATHB4	homeobox-leucine zipper protein 4 [Source:TAIR;Acc:AT2G44910]
HD-ZIP	AT4G17710	0.00210283	-0.235235	0.580065	0.48257	HDG4	homeodomain GLABROUS 4 [Source:TAIR;Acc:AT4G17710]
HD-ZIP	AT4G40060	0.437358	0.462793	0.280636	0.288231	ATHB16	homeobox protein 16 [Source:TAIR;Acc:AT4G40060]
HD-ZIP	AT5G52170	-0.330091	-0.484332	0.0914446	-0.154182	HDG7	homeodomain GLABROUS 7 [Source:TAIR;Acc:AT5G52170]
HD-ZIP	AT5G03790	-0.000795259	-0.0303	-0.00678373	-0.10764	ATHB51	homeobox 51 [Source:TAIR;Acc:AT5G03790]
HD-ZIP	AT1G79840	0.0791767	-0.40776	0.00680181	0.124891	GL2	HD-ZIP IV family of homeobox-leucine zipper protein with lipid-binding START domain [Source:TAIR;Acc:AT1G79840]
HD-ZIP	AT1G27045	0.437089	0.206494	-1.30894	-1.01865	ATHB-54	Homeobox-leucine zipper protein family [Source:TAIR;Acc:AT1G27045]
HD-ZIP	AT1G52150	0.258383	0.121375	0.42247	0.380374	ATHB-15	Homeobox-leucine zipper family protein / lipid-binding START domain-containing protein [Source:TAIR;Acc:AT1G52150]
HD-ZIP	AT4G16780	-1.52975	-1.04676	-1.13019	-1.31478	ATHB-2	homeobox protein 2 [Source:TAIR;Acc:AT4G16780]
HD-ZIP	AT4G00730	-0.0739919	0.0125946	0.372684	0.22714	ANL2	Homeobox-leucine zipper family protein / lipid-binding START domain-containing protein [Source:TAIR;Acc:AT4G00730]
EIL	AT5G21120	-1.02717	-0.435075	-0.241332	0.11829	EIL2	ETHYLENE-INSENSITIVE3-like 2 [Source:TAIR;Acc:AT5G21120]
EIL	AT1G73730	-0.275462	-0.255424	-0.268203	-0.19749	EIL3	ETHYLENE-INSENSITIVE3-like 3 [Source:TAIR;Acc:AT1G73730]
EIL	AT5G65100	0.337429	0.30082	0.391895	0.245369	EIL5	Ethylene insensitive 3 family protein [Source:TAIR;Acc:AT5G65100]
EIL	AT3G20770	-0.337808	-0.185652	0.176563	0.261358	EIN3	Ethylene insensitive 3 family protein [Source:TAIR;Acc:AT3G20770]
EIL	AT2G27050	-0.555305	-0.502781	0.211914	0.520165	EIL1	ETHYLENE-INSENSITIVE3-like 1 [Source:TAIR;Acc:AT2G27050]
EIL	AT5G10120	0.583914	0.434778	-0.00238907	0.134516	EIL4	Ethylene insensitive 3 family protein [Source:TAIR;Acc:AT5G10120]
LFY	AT5G61850	0.458836	-0.177285	1.13186	0.543184	LFY	floral meristem identity control protein LEAFY (LFY) [Source:TAIR;Acc:AT5G61850]
bZIP	AT3G49760	-0.95995	-0.28283	-0.52623	-0.955632	AtbZIP5	basic leucine-zipper 5 [Source:TAIR;Acc:AT3G49760]
bZIP	AT3G12250	0.143811	0.140413	0.476373	0.542556	TGA6	TGACG motif-binding factor 6 [Source:TAIR;Acc:AT3G12250]
bZIP	AT3G10800	-0.163572	0.00245403	0.104384	0.0507418	BZIP28	Basic-leucine zipper (bZIP) transcription factor family protein [Source:TAIR;Acc:AT3G10800]
bZIP	AT1G59530	0.000819922	-0.0620626	-0.00240662	-0.0965112	ATBZIP4	basic leucine-zipper 4 [Source:TAIR;Acc:AT1G59530]
bZIP	AT1G58110	-0.160741	-0.160724	0.179747	0.240861	AT1G58110	Basic-leucine zipper (bZIP) transcription factor family protein [Source:TAIR;Acc:AT1G58110]
bZIP	AT1G32150	-0.203013	-0.132179	-0.0569275	-0.140366	bZIP68	basic region/leucine zipper transcription factor 68 [Source:TAIR;Acc:AT1G32150]
bZIP	AT3G54620	0.0378721	0.0184571	0.215082	0.296438	ATBZIP25	basic leucine zipper 25 [Source:TAIR;Acc:AT3G54620]
bZIP	AT2G42380	-0.825726	-0.789562	-0.57934	-0.800363	ATBZIP34	Basic-leucine zipper (bZIP) transcription factor family protein [Source:TAIR;Acc:AT2G42380]
bZIP	AT5G10030	-0.304074	-0.646005	0.891585	0.912232	TGA4	TGACG motif-binding factor 4 [Source:TAIR;Acc:AT5G10030]
bZIP	AT4G35040	-0.159202	-0.0789969	0.0142886	0.108003	bZIP19	Basic-leucine zipper (bZIP) transcription factor family protein [Source:TAIR;Acc:AT4G35040]
bZIP	AT4G35900	1.09064	-0.0534707	0.56769	0.745852	FD	Basic-leucine zipper (bZIP) transcription factor family protein [Source:TAIR;Acc:AT4G35900]
bZIP	AT4G34000	-1.45644	-0.862186	0.579189	-0.171855	ABF3	abscisic acid responsive elements-binding factor 3 [Source:TAIR;Acc:AT4G34000]
bZIP	AT3G56850	-0.251652	-0.20969	0.351283	0.329935	AREB3	ABA-responsive element binding protein 3 [Source:TAIR;Acc:AT3G56850]
bZIP	AT4G38900	0.0910188	-0.0529155	0.266067	0.212409	AT4G38900	Basic-leucine zipper (bZIP) transcription factor family protein [Source:TAIR;Acc:AT4G38900]
bZIP	AT5G15830	-0.183756	-0.135181	0.661129	0.678944	AtbZIP3	basic leucine-zipper 3 [Source:TAIR;Acc:AT5G15830]
bZIP	AT1G06070	0.281327	0.248525	0.158783	0.096781	AT1G06070	Basic-leucine zipper (bZIP) transcription factor family protein [Source:TAIR;Acc:AT1G06070]
bZIP	AT2G21230	-0.0920586	0.0164822	0.307574	0.261161	BZIP30	Basic-leucine zipper (bZIP) transcription factor family protein [Source:TAIR;Acc:AT2G21230]
bZIP	AT5G42910	-5.16556e-05	-0.0018811	-0.0965111	0.0855085	BZIP15	Basic-leucine zipper (bZIP) transcription factor family protein [Source:TAIR;Acc:AT5G42910]
bZIP	AT5G06950	0.133297	0.061872	0.258225	0.245332	AHBP-1B	bZIP transcription factor family protein [Source:TAIR;Acc:AT5G06950]
bZIP	AT3G30530	-0.743016	-0.223235	-0.993939	-1.19201	ATBZIP42	basic leucine-zipper 42 [Source:TAIR;Acc:AT3G30530]
bZIP	AT1G22070	0.172736	0.158334	0.433997	0.588592	TGA3	TGA1A-related gene 3 [Source:TAIR;Acc:AT1G22070]
bZIP	AT2G22850	0.525498	0.607539	-0.0374632	0.11442	AtbZIP6	basic leucine-zipper 6 [Source:TAIR;Acc:AT2G22850]
bZIP	AT3G58120	0.410113	0.313706	-0.548826	0.0592779	ATBZIP61	Basic-leucine zipper (bZIP) transcription factor family protein [Source:TAIR;Acc:AT3G58120]
bZIP	AT5G06839	0.719395	0.33023	0.327637	0.205328	TGA10	bZIP transcription factor family protein [Source:TAIR;Acc:AT5G06839]
bZIP	AT5G24800	-0.662519	-0.209906	0.745498	0.752628	ATBZIP9	basic leucine zipper 9 [Source:TAIR;Acc:AT5G24800]
bZIP	AT5G11260	-0.789481	-0.667481	-0.694523	-0.675376	HY5	Basic-leucine zipper (bZIP) transcription factor family protein [Source:TAIR;Acc:AT5G11260]
bZIP	AT5G28770	-0.0732325	-0.38505	1.07478	1.15364	BZO2H3	bZIP transcription factor family protein [Source:TAIR;Acc:AT5G28770]
bZIP	AT5G06960	-0.295611	-0.0860744	0.251954	0.181253	OBF5	OCS-element binding factor 5 [Source:TAIR;Acc:AT5G06960]
bZIP	AT1G08320	0.232166	0.0133894	0.501335	0.201364	TGA9	bZIP transcription factor family protein [Source:TAIR;Acc:AT1G08320]
bZIP	AT5G60830	-0.683419	-0.0687529	-0.0251429	0.0390626	AtbZIP70	basic leucine-zipper 70 [Source:TAIR;Acc:AT5G60830]
bZIP	AT1G75390					AtbZIP44	basic leucine-zipper 44 [Source:TAIR;Acc:AT1G75390]
bZIP	AT2G36270	-0.78063	-0.591816	0.58172	0.35333	ABI5	Basic-leucine zipper (bZIP) transcription factor family protein [Source:TAIR;Acc:AT2G36270]
bZIP	AT4G36730	-0.0236564	-0.161698	1.16352	1.18632	GBF1	G-box binding factor 1 [Source:TAIR;Acc:AT4G36730]
bZIP	AT5G65210	-0.32261	-0.300199	0.64858	0.607471	TGA1	bZIP transcription factor family protein [Source:TAIR;Acc:AT5G65210]
bZIP	AT2G40950	0.0741135	0.0432949	0.0183049	-0.0298683	BZIP17	Basic-leucine zipper (bZIP) transcription factor family protein [Source:TAIR;Acc:AT2G40950]
bZIP	AT2G18160	-0.114383	-0.109519	0.000691029	0.0709325	ATBZIP2	basic leucine-zipper 2 [Source:TAIR;Acc:AT2G18160]
bZIP	AT5G08141	-0.124016	-0.00405745	-0.229325	0.0248072	AtbZIP75	basic leucine-zipper 75 [Source:TAIR;Acc:AT5G08141]
bZIP	AT5G38800	-0.76738	-0.164745	-1.7319	-1.76677	AtbZIP43	basic leucine-zipper 43 [Source:TAIR;Acc:AT5G38800]
bZIP	AT5G44080	0.350537	0.095055	0.456835	0.490533	AT5G44080	Basic-leucine zipper (bZIP) transcription factor family protein [Source:TAIR;Acc:AT5G44080]
bZIP	AT2G13150					AT2G13150	Basic-leucine zipper (bZIP) transcription factor family protein [Source:TAIR;Acc:AT2G13150]
bZIP	AT1G49720	0.0433545	0.0703276	0.767724	0.990432	ABF1	abscisic acid responsive element-binding factor 1 [Source:TAIR;Acc:AT1G49720]
bZIP	AT2G35530	0.077582	0.00288133	-0.0853321	-0.131955	bZIP16	basic region/leucine zipper transcription factor 16 [Source:TAIR;Acc:AT2G35530]
bZIP	AT2G04038	0.000819922	0.506537	-0.00240662	-0.0965112	AtbZIP48	basic leucine-zipper 48 [Source:TAIR;Acc:AT2G04038]
bZIP	AT1G68880	0.454416	-0.0782393	0.184987	0.421361	AtbZIP	basic leucine-zipper 8 [Source:TAIR;Acc:AT1G68880]
bZIP	AT2G40620	-0.540642	-0.460889	0.0228704	-0.0328723	AT2G40620	Basic-leucine zipper (bZIP) transcription factor family protein [Source:TAIR;Acc:AT2G40620]
bZIP	AT1G06850	0.44235	0.488831	-0.517205	-0.454567	AtbZIP52	basic leucine-zipper 52 [Source:TAIR;Acc:AT1G06850]
bZIP	AT1G43700	-0.106722	-0.109331	0.860871	0.877977	VIP1	VIRE2-interacting protein 1 [Source:TAIR;Acc:AT1G43700]
bZIP	AT1G45249	-0.401121	-0.103887	-0.481204	-0.548437	ABF2	abscisic acid responsive elements-binding factor 2 [Source:TAIR;Acc:AT1G45249]
bZIP	AT1G13600	0.0723816	0.220986	-0.0560025	0.133738	AtbZIP58	basic leucine-zipper 58 [Source:TAIR;Acc:AT1G13600]
bZIP	AT1G77920	0.10919	0.0727647	-0.071144	-0.248421	TGA7	bZIP transcription factor family protein [Source:TAIR;Acc:AT1G77920]
bZIP	AT1G19490	-0.560054	-0.561445	-0.28412	-0.601554	AT1G19490	Basic-leucine zipper (bZIP) transcription factor family protein [Source:TAIR;Acc:AT1G19490]
bZIP	AT4G01120	-0.318	-0.37344	0.445561	0.447924	GBF2	G-box binding factor 2 [Source:TAIR;Acc:AT4G01120]
bZIP	AT2G16770	0.0776827	0.116835	0.140098	0.00731873	bZIP23	Basic-leucine zipper (bZIP) transcription factor family protein [Source:TAIR;Acc:AT2G16770]
bZIP	AT3G62420	-0.0614299	0.000975566	0.849885	0.851356	ATBZIP53	basic region/leucine zipper motif 53 [Source:TAIR;Acc:AT3G62420]
bZIP	AT2G17770	0.0391177	-0.417314	0.251005	0.0307593	BZIP27	basic region/leucine zipper motif 27 [Source:TAIR;Acc:AT2G17770]
bZIP	AT2G31370	0.153664	0.155218	-0.207862	-0.170062	AT2G31370	Basic-leucine zipper (bZIP) transcription factor family protein [Source:TAIR;Acc:AT2G31370]
bZIP	AT2G41070	-0.0466601	-0.0943395	0.0460923	-0.0162765	EEL	Basic-leucine zipper (bZIP) transcription factor family protein [Source:TAIR;Acc:AT2G41070]
bZIP	AT1G03970	0.443473	0.240196	0.292865	0.367336	GBF4	G-box binding factor 4 [Source:TAIR;Acc:AT1G03970]
bZIP	AT4G34590					ATB2	G-box binding factor 6 [Source:TAIR;Acc:AT4G34590]
bZIP	AT1G68640	1.34532	0.752947	0.585883	0.665019	PAN	bZIP transcription factor family protein [Source:TAIR;Acc:AT1G68640]
bZIP	AT3G17609	-1.45012	-1.35047	-2.19287	-2.20807	HYH	HY5-homolog [Source:TAIR;Acc:AT3G17609]
bZIP	AT5G49450					AtbZIP1	basic leucine-zipper 1 [Source:TAIR;Acc:AT5G49450]
bZIP	AT3G56660	-0.717393	-0.726863	-0.031554	-0.158916	BZIP49	basic region/leucine zipper motif protein 49 [Source:TAIR;Acc:AT3G56660]
bZIP	AT2G12940					UNE4	Basic-leucine zipper (bZIP) transcription factor family protein [Source:TAIR;Acc:AT2G12940]
bZIP	AT5G07160			0.0925513		AT5G07160	Basic-leucine zipper (bZIP) transcription factor family protein [Source:TAIR;Acc:AT5G07160]
bZIP	AT2G12900					AT2G12900	Basic-leucine zipper (bZIP) transcription factor family protein [Source:TAIR;Acc:AT2G12900]
bZIP	AT3G51960	0.396566	-0.179424	-0.709976	-0.557586	ATBZIP24	basic leucine zipper 24 [Source:TAIR;Acc:AT3G51960]
bZIP	AT4G37730	-1.00447	-0.624937	-0.431679	-0.633288	AtbZIP7	basic leucine-zipper 7 [Source:TAIR;Acc:AT4G37730]
bZIP	AT3G19290	-0.402616	-0.466726	0.354409	0.195443	ABF4	ABRE binding factor 4 [Source:TAIR;Acc:AT3G19290]
bZIP	AT2G46270	-0.618289	-0.415005	0.466578	0.189607	GBF3	G-box binding factor 3 [Source:TAIR;Acc:AT2G46270]
bZIP	AT4G02640	-0.0505421	0.0109922	-0.353796	-0.265111	BZO2H1	bZIP transcription factor family protein [Source:TAIR;Acc:AT4G02640]
bZIP	AT3G44460			0.0925513		DPBF2	Basic-leucine zipper (bZIP) transcription factor family protein [Source:TAIR;Acc:AT3G44460]
bZIP	AT4G06598	-0.0982705	-0.167585	0.12887	0.254718	AT4G06598	BEST Arabidopsis thaliana protein match is: Basic-leucine zipper (bZIP) transcription factor family protein (TAIR:AT1G58110.2);
bZIP	AT1G42990	-0.200256	-0.183709	-0.402421	-0.398524	ATBZIP60	basic region/leucine zipper motif 60 [Source:TAIR;Acc:AT1G42990]
BBR-BPC	AT1G14685	0.16757	-0.0611869	0.290294	0.42702	BPC2	basic pentacysteine 2 [Source:TAIR;Acc:AT1G14685]
BBR-BPC	AT1G68120	-0.0738721	-0.0818766	0.057298	-0.141577	BPC3	basic pentacysteine 3 [Source:TAIR;Acc:AT1G68120]
BBR-BPC	AT2G35550	-0.308857	-0.0395833	0.278503	-0.0792048	BPC7	basic pentacysteine 7 [Source:TAIR;Acc:AT2G35550]
BBR-BPC	AT4G38910	-0.0202898	0.0575753	0.622875	0.639799	BPC5	basic pentacysteine 5 [Source:TAIR;Acc:AT4G38910]
BBR-BPC	AT2G01930	-0.210715	-0.318812	0.65351	0.648684	BPC1	basic pentacysteine1 [Source:TAIR;Acc:AT2G01930]
BBR-BPC	AT2G21240	-0.0962593	-0.00961524	0.600592	0.663335	BPC4	basic pentacysteine 4 [Source:TAIR;Acc:AT2G21240]
BBR-BPC	AT5G42520	-0.0595289	-0.0604011	0.518346	0.649053	BPC6	basic pentacysteine 6 [Source:TAIR;Acc:AT5G42520]
Whirly	AT1G14410	0.379587	0.159256	0.077311	0.0841306	ATWHY1	ssDNA-binding transcriptional regulator [Source:TAIR;Acc:AT1G14410]
Whirly	AT1G71260	0.337461	0.200048	0.300042	0.351963	ATWHY2	WHIRLY 2 [Source:TAIR;Acc:AT1G71260]
Whirly	AT2G02740	0.525119	0.362835	-0.0814407	-0.0199916	ATWHY3	ssDNA-binding transcriptional regulator [Source:TAIR;Acc:AT2G02740]
GRF	AT2G22840	0.396286	0.121128	0.608217	0.606562	AtGRF1	growth-regulating factor 1 [Source:TAIR;Acc:AT2G22840]
GRF	AT4G37740	0.440169	0.0329767	0.168661	0.0338172	AtGRF2	growth-regulating factor 2 [Source:TAIR;Acc:AT4G37740]
GRF	AT3G52910	-0.269759	0.146606	0.128043	0.39342	AtGRF4	growth-regulating factor 4 [Source:TAIR;Acc:AT3G52910]
GRF	AT2G45480	0.517528	0.445492	0.377741	0.510793	AtGRF9	growth-regulating factor 9 [Source:TAIR;Acc:AT2G45480]
GRF	AT5G53660	1.44344	1.20414	0.876895	0.619159	AtGRF7	growth-regulating factor 7 [Source:TAIR;Acc:AT5G53660]
GRF	AT2G36400	0.963189	0.675902	1.09768	1.29983	AtGRF3	growth-regulating factor 3 [Source:TAIR;Acc:AT2G36400]
GRF	AT2G06200	-0.0132726	0.327724	-0.641949	-0.647093	AtGRF6	growth-regulating factor 6 [Source:TAIR;Acc:AT2G06200]
GRF	AT3G13960	0.88358	0.496165	0.763605	0.746156	AtGRF5	growth-regulating factor 5 [Source:TAIR;Acc:AT3G13960]
GRF	AT4G24150	-0.153553	-0.322677	0.707273	0.588293	AtGRF8	growth-regulating factor 8 [Source:TAIR;Acc:AT4G24150]
SAP	AT5G35770	1.23294	0.681596	0.709146	0.82839	SAP	Transducin/WD40 repeat-like superfamily protein [Source:TAIR;Acc:AT5G35770]
C2H2	AT1G66140	1.09678	0.368201	1.19926	1.7575	ZFP4	zinc finger protein 4 [Source:TAIR;Acc:AT1G66140]
C2H2	AT1G27730	-1.99484	-1.46496	0.38726	0.200947	STZ	salt tolerance zinc finger [Source:TAIR;Acc:AT1G27730]
C2H2	AT1G13290	0.417637	0.323642	0.462742	-0.0104603	DOT5	C2H2-like zinc finger protein [Source:TAIR;Acc:AT1G13290]
C2H2	AT2G26940	0.197276	-0.0367103	0.48538	-0.821187	AT2G26940	C2H2-type zinc finger family protein [Source:TAIR;Acc:AT2G26940]
C2H2	AT3G60580	0.174738	0.0252004	-0.268949	-0.0742896	ZAT9	C2H2-like zinc finger protein [Source:TAIR;Acc:AT3G60580]
C2H2	AT1G04445	-0.608803	-0.341501	-0.0410481	-0.415396	AT1G04445	C2H2-like zinc finger protein [Source:TAIR;Acc:AT1G04445]
C2H2	AT2G18490	-0.105059	-0.0508605	-0.423564	-0.189119	AT2G18490	C2H2-like zinc finger protein [Source:TAIR;Acc:AT2G18490]
C2H2	AT3G19580	-1.28209	-0.478781	-0.273967	-0.0827996	AZF2	zinc-finger protein 2 [Source:TAIR;Acc:AT3G19580]
C2H2	AT3G58070	-0.793154	-0.104896	-0.290428	-0.288209	GIS	C2H2 and C2HC zinc fingers superfamily protein [Source:TAIR;Acc:AT3G58070]
C2H2	AT4G06634	-0.0573584	-0.130113	0.0585045	-0.0090007	AT4G06634	zinc finger (C2H2 type) family protein [Source:TAIR;Acc:AT4G06634]
C2H2	AT1G10480	-0.108956	-0.0620626	-0.00877859	-0.0965112	ZFP5	zinc finger protein 5 [Source:TAIR;Acc:AT1G10480]
C2H2	AT5G67450	0.11282	0.141191	0.328289	0.108905	AZF1	zinc-finger protein 1 [Source:TAIR;Acc:AT5G67450]
C2H2	AT5G10970	0.120192	-0.0585714	0.624988	0.515812	AT5G10970	C2H2 and C2HC zinc fingers superfamily protein [Source:TAIR;Acc:AT5G10970]
C2H2	AT1G30970	0.0993984	0.0477857	0.513904	0.39176	SUF4	zinc finger (C2H2 type) family protein [Source:TAIR;Acc:AT1G30970]
C2H2	AT3G46080	-0.339614	-0.138079	0.39984	0.810365	ZAT8	C2H2-type zinc finger family protein [Source:TAIR;Acc:AT3G46080]
C2H2	AT3G20880	0.984485	0.10653	-0.146467	0.111197	WIP4	WIP domain protein 4 [Source:TAIR;Acc:AT3G20880]
C2H2	AT2G28200	-0.106397	0.224295	-0.221765	0.0709403	ZAT5	C2H2-type zinc finger family protein [Source:TAIR;Acc:AT2G28200]
C2H2	AT3G23130	-0.0148492	-0.00166091	0.578395	0.504507	SUP	C2H2 and C2HC zinc fingers superfamily protein [Source:TAIR;Acc:AT3G23130]
C2H2	AT2G37740	-0.215022	0.136096	-0.358726	0.0201083	ATZFP10	zinc-finger protein 10 [Source:TAIR;Acc:AT2G37740]
C2H2	AT5G52010	0.652537	0.386116	-0.112764	0.0653302	AT5G52010	C2H2-like zinc finger protein [Source:TAIR;Acc:AT5G52010]
C2H2	AT1G24625	0.578413	0.41038	1.27047	1.28301	ZFP7	zinc finger protein 7 [Source:TAIR;Acc:AT1G24625]
C2H2	AT2G37430	0.782458	0.176786	0.032127	0.189744	ZAT11	C2H2 and C2HC zinc fingers superfamily protein [Source:TAIR;Acc:AT2G37430]
C2H2	AT2G15740	-5.16556e-05	-0.0018811	-0.0965111	-0.0969405	AT2G15740	C2H2-like zinc finger protein [Source:TAIR;Acc:AT2G15740]
C2H2	AT4G35700	-1.02005	-0.696077	-0.549846	-0.487825	AT4G35700	zinc finger (C2H2 type) family protein [Source:TAIR;Acc:AT4G35700]
C2H2	AT1G25250	-0.514869	-0.268633	-0.65786	-0.526192	AtIDD16	indeterminate(ID)-domain 16 [Source:TAIR;Acc:AT1G25250]
C2H2	AT1G08290	-0.0165253	-0.051333	-0.84235	-0.899535	WIP3	WIP domain protein 3 [Source:TAIR;Acc:AT1G08290]
C2H2	AT3G57480	-0.755895	-0.492006	-0.300134	-0.128363	SAP13	zinc finger (C2H2 type, AN1-like) family protein [Source:TAIR;Acc:AT3G57480]
C2H2	AT1G68130	0.12659	0.167112	-0.0502633	0.0275557	AtIDD14	indeterminate(ID)-domain 14 [Source:TAIR;Acc:AT1G68130]
C2H2	AT5G56200	-0.448758	-0.110505	-0.205406	-0.557823	AT5G56200	C2H2 type zinc finger transcription factor family [Source:TAIR;Acc:AT5G56200]
C2H2	AT3G46070	0.239951	0.169117	0.207474	-0.0366343	AT3G46070	C2H2-type zinc finger family protein [Source:TAIR;Acc:AT3G46070]
C2H2	AT1G75710	0.232896	0.200863	0.154335	0.183664	AT1G75710	C2H2-like zinc finger protein [Source:TAIR;Acc:AT1G75710]
C2H2	AT2G01940	-1.06347	-0.599353	0.213192	0.17246	SGR5	C2H2-like zinc finger protein [Source:TAIR;Acc:AT2G01940]
C2H2	AT5G66730	-0.327298	-0.289862	0.240967	0.152215	AT5G66730	C2H2-like zinc finger protein [Source:TAIR;Acc:AT5G66730]
C2H2	AT2G02080	0.175267	0.158719	0.529955	0.560837	AtIDD4	indeterminate(ID)-domain 4 [Source:TAIR;Acc:AT2G02080]
C2H2	AT5G01860	-0.109566	0.077831	0.102298	-0.0969405	AT5G01860	C2H2 and C2HC zinc fingers superfamily protein [Source:TAIR;Acc:AT5G01860]
C2H2	AT4G17810	0.0893752	-0.0103043	0.703149	0.521134	AT4G17810	C2H2 and C2HC zinc fingers superfamily protein [Source:TAIR;Acc:AT4G17810]
C2H2	AT2G42410	0.203516	0.284229	-0.23142	-0.0447579	ZFP11	zinc finger protein 11 [Source:TAIR;Acc:AT2G42410]
C2H2	AT5G06070	-0.0160771	-0.118521	-0.0793136	-0.263676	RBE	C2H2 and C2HC zinc fingers superfamily protein [Source:TAIR;Acc:AT5G06070]
C2H2	AT5G14140	-0.0385208	-0.0769534	-0.0193866	-0.0736149	AT5G14140	zinc ion binding;nucleic acid binding;zinc ion binding [Source:TAIR;Acc:AT5G14140]
C2H2	AT5G27880	0.246139	-0.00133682	0.269538	-0.0965112	AT5G27880	C2H2 and C2HC zinc fingers superfamily protein [Source:TAIR;Acc:AT5G27880]
C2H2	AT5G60470	-0.476611	-0.41579	-0.697154	-0.971257	AT5G60470	C2H2 and C2HC zinc fingers superfamily protein [Source:TAIR;Acc:AT5G60470]
C2H2	AT1G80730	0.396625	0.22066	-0.00718603	0.241705	ZFP1	zinc-finger protein 1 [Source:TAIR;Acc:AT1G80730]
C2H2	AT5G25160	0.503052	0.863069	0.250619	0.253591	ZFP3	zinc finger protein 3 [Source:TAIR;Acc:AT5G25160]
C2H2	AT1G34790	-0.669861	-0.215748	0.191463	0.323798	TT1	C2H2 and C2HC zinc fingers superfamily protein [Source:TAIR;Acc:AT1G34790]
C2H2	AT3G53600	-1.05878	-0.780118	-1.11767	-0.904531	AT3G53600	C2H2-type zinc finger family protein [Source:TAIR;Acc:AT3G53600]
C2H2	AT5G43540	-0.109566	-0.0625276	-0.0965111	-0.0969405	AT5G43540	C2H2 and C2HC zinc fingers superfamily protein [Source:TAIR;Acc:AT5G43540]
C2H2	AT1G74250	0.254649	0.132307	-0.0341005	0.121239	AT1G74250	DNAJ heat shock N-terminal domain-containing protein [Source:TAIR;Acc:AT1G74250]
C2H2	AT5G57520	2.60491	1.45619	0.356798	0.297895	ZFP2	zinc finger protein 2 [Source:TAIR;Acc:AT5G57520]
C2H2	AT4G12240	0.189902	0.184459	0.0269915	-0.0913229	AT4G12240	zinc finger (C2H2 type) family protein [Source:TAIR;Acc:AT4G12240]
C2H2	AT1G03840	0.440657	0.345342	-0.709326	-0.755554	MGP	C2H2 and C2HC zinc fingers superfamily protein [Source:TAIR;Acc:AT1G03840]
C2H2	AT5G04390	-1.04255	-0.586132	-0.843191	-1.17259	AT5G04390	C2H2-type zinc finger family protein [Source:TAIR;Acc:AT5G04390]
C2H2	AT4G35610	-0.978363	-0.682284	-0.717505	-0.589649	AT4G35610	zinc finger (C2H2 type) family protein [Source:TAIR;Acc:AT4G35610]
C2H2	AT3G44750	0.388939	0.0906469	0.00288305	-0.0908392	HD2A	histone deacetylase 3 [Source:TAIR;Acc:AT3G44750]
C2H2	AT5G03150	0.041278	-0.026499	0.0379686	0.149244	JKD	C2H2-like zinc finger protein [Source:TAIR;Acc:AT5G03150]
C2H2	AT3G29340	0.0030644	0.213148	0.390712	0.942262	AT3G29340	zinc finger (C2H2 type) family protein [Source:TAIR;Acc:AT3G29340]
C2H2	AT1G72050	0.0607386	-0.0225887	0.0485641	0.0276191	TFIIIA	transcription factor IIIA [Source:TAIR;Acc:AT1G72050]
C2H2	AT3G45260	0.47142	0.372081	0.920573	1.51828	AT3G45260	C2H2-like zinc finger protein [Source:TAIR;Acc:AT3G45260]
C2H2	AT5G59820	-2.05463	-0.823811	0.251715	0.245278	RHL41	C2H2-type zinc finger family protein [Source:TAIR;Acc:AT5G59820]
C2H2	AT5G22890		0.0606277	0.396362	0.279341	AT5G22890	C2H2 and C2HC zinc fingers superfamily protein [Source:TAIR;Acc:AT5G22890]
C2H2	AT5G05120	-0.109566	-0.0018811	-0.00876103	-0.0969405	AT5G05120	C2H2 and C2HC zinc fingers superfamily protein [Source:TAIR;Acc:AT5G05120]
C2H2	AT4G25610	-0.118889	-0.221758	0.0117285	-0.138734	AT4G25610	C2H2-like zinc finger protein [Source:TAIR;Acc:AT4G25610]
C2H2	AT5G14010	1.48133	0.133323	0.547024	0.599842	KNU	C2H2 and C2HC zinc fingers superfamily protein [Source:TAIR;Acc:AT5G14010]
C2H2	AT4G02670	0.234279	0.0141901	0.185454	0.0146669	AtIDD12	indeterminate(ID)-domain 12 [Source:TAIR;Acc:AT4G02670]
C2H2	AT2G41835	-0.141903	-0.248032	-0.300607	-0.212206	SAP11	zinc finger (C2H2 type, AN1-like) family protein [Source:TAIR;Acc:AT2G41835]
C2H2	AT1G34370	-0.0845246	-0.113519	0.592846	0.651013	STOP1	C2H2 and C2HC zinc fingers superfamily protein [Source:TAIR;Acc:AT1G34370]
C2H2	AT5G61470					AT5G61470	C2H2-like zinc finger protein [Source:TAIR;Acc:AT5G61470]
C2H2	AT2G29660	0.24107	0.270783	-0.315147	-0.269507	AT2G29660	zinc finger (C2H2 type) family protein [Source:TAIR;Acc:AT2G29660]
C2H2	AT5G44160	-0.279836	-0.0885103	-0.0964819	-0.0545491	NUC	C2H2-like zinc finger protein [Source:TAIR;Acc:AT5G44160]
C2H2	AT3G50700	0.244001	0.467682	1.1978	1.24852	AtIDD2	indeterminate(ID)-domain 2 [Source:TAIR;Acc:AT3G50700]
C2H2	AT5G03510	-0.737239	-0.02016	-0.575367	-0.371757	AT5G03510	C2H2-type zinc finger family protein [Source:TAIR;Acc:AT5G03510]
C2H2	AT1G26590	-0.679623	-0.218467	-0.306297	-0.422881	AT1G26590	C2H2-like zinc finger protein [Source:TAIR;Acc:AT1G26590]
C2H2	AT4G16610	0.328718	0.407172	-0.237743	0.0976707	AT4G16610	C2H2-like zinc finger protein [Source:TAIR;Acc:AT4G16610]
C2H2	AT5G42640		0.0606277			AT5G42640	C2H2 and C2HC zinc fingers superfamily protein [Source:TAIR;Acc:AT5G42640]
C2H2	AT3G49930	-0.942878	-0.249413	-0.27482	-0.185117	AT3G49930	C2H2 and C2HC zinc fingers superfamily protein [Source:TAIR;Acc:AT3G49930]
C2H2	AT5G63280	0.0510722	-0.0380035	0.156468	0.188639	AT5G63280	C2H2-like zinc finger protein [Source:TAIR;Acc:AT5G63280]
C2H2	AT1G26610	-1.43721	-0.73629	-0.413028	-1.17805	AT1G26610	C2H2-like zinc finger protein [Source:TAIR;Acc:AT1G26610]
C2H2	AT5G22990		0.06156	0.24527	0.104928	AT5G22990	C2H2-like zinc finger protein [Source:TAIR;Acc:AT5G22990]
C2H2	AT3G48430	0.226322	0.111125	0.0902664	0.0307903	REF6	relative of early flowering 6 [Source:TAIR;Acc:AT3G48430]
C2H2	AT2G45120	0.160778	0.347119	0.0174706	-0.00878162	ZAT4	C2H2-like zinc finger protein [Source:TAIR;Acc:AT2G45120]
C2H2	AT3G57670	0.299947	0.244807	-0.16522	-0.168947	NTT	C2H2-type zinc finger family protein [Source:TAIR;Acc:AT3G57670]
C2H2	AT3G10470	-0.993101	-0.803979	-0.632024	-0.922411	AT3G10470	C2H2-type zinc finger family protein [Source:TAIR;Acc:AT3G10470]
C2H2	AT1G55110	-0.503554	-0.335354	0.192575	0.0395663	AtIDD7	indeterminate(ID)-domain 7 [Source:TAIR;Acc:AT1G55110]
C2H2	AT3G53820	-0.108956	-0.0620626	-0.0965249	-0.0965112	AT3G53820	C2H2 and C2HC zinc fingers superfamily protein [Source:TAIR;Acc:AT3G53820]
C2H2	AT5G43170	0.139214	0.175875	0.0471013	-0.0248822	AZF3	zinc-finger protein 3 [Source:TAIR;Acc:AT5G43170]
C2H2	AT3G13810	0.0692327	0.250853	-0.362202	-0.126121	AtIDD11	indeterminate(ID)-domain 11 [Source:TAIR;Acc:AT3G13810]
C2H2	AT2G41940	-0.272107	-0.247697	0.604384	0.468354	ZFP8	zinc finger protein 8 [Source:TAIR;Acc:AT2G41940]
C2H2	AT2G28710	0.432963	-0.195171	-0.0277575	0.0283942	AT2G28710	C2H2-type zinc finger family protein [Source:TAIR;Acc:AT2G28710]
C2H2	AT1G14580	0.810668	0.151674	0.266009	0.21694	AT1G14580	C2H2-like zinc finger protein [Source:TAIR;Acc:AT1G14580]
C2H2	AT2G02070	0.362562	0.107429	0.359314	0.459293	AtIDD5	indeterminate(ID)-domain 5 [Source:TAIR;Acc:AT2G02070]
C2H2	AT5G06650	-0.529642	0.0381496	-0.434279	-0.70325	GIS2	C2H2 and C2HC zinc fingers superfamily protein [Source:TAIR;Acc:AT5G06650]
C2H2	AT2G17180	-0.75809	-0.440075	-0.421494	-0.572797	ZAT2	C2H2-like zinc finger protein [Source:TAIR;Acc:AT2G17180]
C2H2	AT5G04240	-0.125668	-0.0874915	0.302262	0.243437	ELF6	Zinc finger (C2H2 type) family protein / transcription factor jumonji (jmj) family protein [Source:TAIR;Acc:AT5G04240]
C2H2	AT5G03740	0.30292	0.0681162	0.0312723	-0.0782856	HD2C	histone deacetylase 2C [Source:TAIR;Acc:AT5G03740]
C2H2	AT1G51220	-0.681845	-0.199321	-0.615089	-0.60934	WIP5	WIP domain protein 5 [Source:TAIR;Acc:AT1G51220]
C2H2	AT5G15480	0.526987	0.500436	0.579652	0.43544	AT5G15480	C2H2-type zinc finger family protein [Source:TAIR;Acc:AT5G15480]
C2H2	AT4G27240	0.272236	0.182314	0.186167	0.141949	AT4G27240	zinc finger (C2H2 type) family protein [Source:TAIR;Acc:AT4G27240]
C2H2	AT1G02030	-0.506823	-0.129301	-0.369787	-0.0262723	ZAT1	C2H2-like zinc finger protein [Source:TAIR;Acc:AT1G02030]
C2H2	AT5G04340	-1.92167	-0.99886	0.219129	0.340335	C2H2	zinc finger of Arabidopsis thaliana 6 [Source:TAIR;Acc:AT5G04340]
C2H2	AT4G35280	-1.07924	-0.49623	-0.472004	-1.08638	ZAT3	C2H2-like zinc finger protein [Source:TAIR;Acc:AT4G35280]
C2H2	AT3G46090	-0.674309	-0.34692	-0.0937124	0.220171	ZAT7	C2H2 and C2HC zinc fingers superfamily protein [Source:TAIR;Acc:AT3G46090]
WRKY	AT1G13960	-0.372562	-0.252886	0.60863	0.77687	WRKY4	WRKY DNA-binding protein 4 [Source:TAIR;Acc:AT1G13960]
WRKY	AT2G04880	-0.205776	-0.0770756	-0.23467	-0.242534	ZAP1	zinc-dependent activator protein-1 [Source:TAIR;Acc:AT2G04880]
WRKY	AT5G45050	-0.0826383	-0.0870014	-0.0712678	-0.0601972	TTR1	Disease resistance protein (TIR-NBS-LRR class) [Source:TAIR;Acc:AT5G45050]
WRKY	AT5G52830	-0.158768	-0.0358055	-0.496069	-0.507751	WRKY27	WRKY DNA-binding protein 27 [Source:TAIR;Acc:AT5G52830]
WRKY	AT1G68150	0.227164	0.0977733	0.738653	-0.118628	WRKY9	WRKY DNA-binding protein 9 [Source:TAIR;Acc:AT1G68150]
WRKY	AT5G07100	-0.569077	-0.048563	1.61052	2.1606	WRKY26	WRKY DNA-binding protein 26 [Source:TAIR;Acc:AT5G07100]
WRKY	AT5G45260	-0.0156284	-0.146947	-0.35606	-0.307561	RRS1	Disease resistance protein (TIR-NBS-LRR class) [Source:TAIR;Acc:AT5G45260]
WRKY	AT4G01250	-1.67946	-1.79483	0.743644	0.535025	WRKY22	WRKY family transcription factor [Source:TAIR;Acc:AT4G01250]
WRKY	AT5G22570	0.525759	0.361754			WRKY38	WRKY DNA-binding protein 38 [Source:TAIR;Acc:AT5G22570]
WRKY	AT2G46400	-2.5851	-0.867206	-0.753796	-0.854319	WRKY46	WRKY DNA-binding protein 46 [Source:TAIR;Acc:AT2G46400]
WRKY	AT3G01970	-0.975274	-0.701433	0.11218	0.521294	WRKY45	WRKY DNA-binding protein 45 [Source:TAIR;Acc:AT3G01970]
WRKY	AT2G40740	0.0825775	0.0995414	0.226976	-0.226388	WRKY55	WRKY DNA-binding protein 55 [Source:TAIR;Acc:AT2G40740]
WRKY	AT1G69310	0.0840822	-0.41572	-0.0286065	-0.230417	WRKY57	WRKY DNA-binding protein 57 [Source:TAIR;Acc:AT1G69310]
WRKY	AT5G13080	0.0891478	-0.191499	0.925199	0.712094	WRKY75	WRKY DNA-binding protein 75 [Source:TAIR;Acc:AT5G13080]
WRKY	AT2G46130	0.558247	0.581517	-0.148113	-0.56655	WRKY43	WRKY DNA-binding protein 43 [Source:TAIR;Acc:AT2G46130]
WRKY	AT2G23320	-0.892517	-0.722742	0.563051	0.549733	WRKY15	WRKY DNA-binding protein 15 [Source:TAIR;Acc:AT2G23320]
WRKY	AT4G26440	-1.21637	-0.568977	-0.117368	-1.11786	WRKY34	WRKY DNA-binding protein 34 [Source:TAIR;Acc:AT4G26440]
WRKY	AT2G40750	-0.767066	-0.238731	-1.5963	-1.33027	WRKY54	WRKY DNA-binding protein 54 [Source:TAIR;Acc:AT2G40750]
WRKY	AT4G22070	-1.82623	-0.62889	-0.467019	-1.40517	WRKY31	WRKY DNA-binding protein 31 [Source:TAIR;Acc:AT4G22070]
WRKY	AT4G23550	1.57458	1.19061	1.28212	1.08618	WRKY29	WRKY family transcription factor [Source:TAIR;Acc:AT4G23550]
WRKY	AT2G47260	-0.175742	-0.108695	-0.403292	-0.415923	WRKY23	WRKY DNA-binding protein 23 [Source:TAIR;Acc:AT2G47260]
WRKY	AT2G38470	-1.46308	-0.74871	0.37136	0.305727	WRKY33	WRKY DNA-binding protein 33 [Source:TAIR;Acc:AT2G38470]
WRKY	AT1G18860	-0.183467	-0.0774313	-0.0542174	-0.100206	WRKY61	WRKY DNA-binding protein 61 [Source:TAIR;Acc:AT1G18860]
WRKY	AT2G34830	-0.0437813	-0.215289	-0.275752	-0.625577	WRKY35	WRKY DNA-binding protein 35 [Source:TAIR;Acc:AT2G34830]
WRKY	AT5G26170	-0.0441457	-0.00569505	0.198068	-0.00157652	WRKY50	WRKY DNA-binding protein 50 [Source:TAIR;Acc:AT5G26170]
WRKY	AT4G11070	0.349813	0.247877	0.615653	0.464389	WRKY41	WRKY family transcription factor [Source:TAIR;Acc:AT4G11070]
WRKY	AT3G56400	-1.3926	-0.644342	0.641522	0.470832	WRKY70	WRKY DNA-binding protein 70 [Source:TAIR;Acc:AT3G56400]
WRKY	AT1G64000	-0.559298	-0.247368	-0.425179	-0.388717	WRKY56	WRKY DNA-binding protein 56 [Source:TAIR;Acc:AT1G64000]
WRKY	AT2G03340	0.478595	0.256279	0.457832	0.656796	WRKY3	WRKY DNA-binding protein 3 [Source:TAIR;Acc:AT2G03340]
WRKY	AT2G44745	0.22885	0.557852	0.412975	0.234683	WRKY12	WRKY family transcription factor [Source:TAIR;Acc:AT2G44745]
WRKY	AT4G23810	-0.440522	-0.333289	-0.459525	-0.227682	WRKY53	WRKY family transcription factor [Source:TAIR;Acc:AT4G23810]
WRKY	AT1G80840	-3.08671	-1.2758	0.687314	0.393361	WRKY40	WRKY DNA-binding protein 40 [Source:TAIR;Acc:AT1G80840]
WRKY	AT1G80590					WRKY66	WRKY DNA-binding protein 66 [Source:TAIR;Acc:AT1G80590]
WRKY	AT2G21900					WRKY59	WRKY DNA-binding protein 59 [Source:TAIR;Acc:AT2G21900]
WRKY	AT3G58710	0.614898	0.285973	0.484646	0.513335	WRKY69	WRKY DNA-binding protein 69 [Source:TAIR;Acc:AT3G58710]
WRKY	AT2G30590	0.110881	-0.115033	0.710842	0.88055	WRKY21	WRKY DNA-binding protein 21 [Source:TAIR;Acc:AT2G30590]
WRKY	AT1G62300	-0.841711	-0.116649	-1.13481	-0.84311	WRKY6	WRKY family transcription factor [Source:TAIR;Acc:AT1G62300]
WRKY	AT5G41570		0.0606277	0.0925513		WRKY24	WRKY DNA-binding protein 24 [Source:TAIR;Acc:AT5G41570]
WRKY	AT4G18170	0.0960673	0.184077	1.53981	1.76782	WRKY28	WRKY DNA-binding protein 28 [Source:TAIR;Acc:AT4G18170]
WRKY	AT1G30650	0.589158	0.575902	-0.216472	-0.1208	WRKY14	WRKY DNA-binding protein 14 [Source:TAIR;Acc:AT1G30650]
WRKY	AT4G31550	-0.0496268	-0.233811	0.027405	-0.107141	WRKY11	WRKY DNA-binding protein 11 [Source:TAIR;Acc:AT4G31550]
WRKY	AT1G66560					WRKY64	WRKY DNA-binding protein 64 [Source:TAIR;Acc:AT1G66560]
WRKY	AT4G12020	-0.151095	-0.0316544	0.119106	0.0767554	WRKY19	protein kinase family protein [Source:TAIR;Acc:AT4G12020]
WRKY	AT1G29860	0.476341		0.167485		WRKY71	WRKY DNA-binding protein 71 [Source:TAIR;Acc:AT1G29860]
WRKY	AT4G24240	-0.601142	-0.896697	0.39703	0.232084	WRKY7	WRKY DNA-binding protein 7 [Source:TAIR;Acc:AT4G24240]
WRKY	AT4G04450	-1.34113	-0.640409	-0.753909	-1.3232	WRKY42	WRKY family transcription factor [Source:TAIR;Acc:AT4G04450]
WRKY	AT3G62340	-0.754607	-0.170956	0.043139	-0.212028	WRKY68	WRKY family transcription factor [Source:TAIR;Acc:AT3G62340]
WRKY	AT2G30250	0.16105	-0.423201	0.888927	0.79266	WRKY25	WRKY DNA-binding protein 25 [Source:TAIR;Acc:AT2G30250]
WRKY	AT4G39410	0.445532	0.481127	-0.486555	-0.437063	WRKY13	WRKY DNA-binding protein 13 [Source:TAIR;Acc:AT4G39410]
WRKY	AT5G01900	1.05874	0.0751806	-0.00240662	0.00734323	WRKY62	WRKY DNA-binding protein 62 [Source:TAIR;Acc:AT5G01900]
WRKY	AT4G31800	-0.779243	-0.19431	-0.23908	-0.0676165	WRKY18	WRKY DNA-binding protein 18 [Source:TAIR;Acc:AT4G31800]
WRKY	AT2G37260	0.566479	0.126775	0.44275	0.792495	TTG2	WRKY family transcription factor family protein [Source:TAIR;Acc:AT2G37260]
WRKY	AT2G25000	-0.0303916	-0.547414	-0.603319	-0.22683	WRKY60	WRKY DNA-binding protein 60 [Source:TAIR;Acc:AT2G25000]
WRKY	AT3G01080	0.687668	0.25624	1.01808	1.28464	WRKY58	WRKY DNA-binding protein 58 [Source:TAIR;Acc:AT3G01080]
WRKY	AT1G55600	0.10982	0.06156	0.24527	0.279341	WRKY10	WRKY DNA-binding protein 10 [Source:TAIR;Acc:AT1G55600]
WRKY	AT1G29280	0.449588	0.0549421	-0.120997	-0.462964	WRKY65	WRKY DNA-binding protein 65 [Source:TAIR;Acc:AT1G29280]
WRKY	AT5G56270	-0.685399	-0.205172	-0.122651	-0.118723	WRKY2	WRKY DNA-binding protein 2 [Source:TAIR;Acc:AT5G56270]
WRKY	AT5G49520	-0.497384	-0.6016	0.384098	-0.118165	WRKY48	WRKY DNA-binding protein 48 [Source:TAIR;Acc:AT5G49520]
WRKY	AT1G69810	-0.129387	-0.417381	-0.257	0.229656	WRKY36	WRKY DNA-binding protein 36 [Source:TAIR;Acc:AT1G69810]
WRKY	AT4G01720	-0.252993	-0.465398	-0.407498	-0.0397811	WRKY47	WRKY family transcription factor [Source:TAIR;Acc:AT4G01720]
WRKY	AT5G43290	-1.36788	-0.752084	0.704416	0.613028	WRKY49	WRKY DNA-binding protein 49 [Source:TAIR;Acc:AT5G43290]
WRKY	AT5G28650	0.59252	0.516909	0.164296	0.232285	WRKY74	WRKY DNA-binding protein 74 [Source:TAIR;Acc:AT5G28650]
WRKY	AT2G24570	-0.179464	-0.271148	-0.468153	-0.501969	WRKY17	WRKY DNA-binding protein 17 [Source:TAIR;Acc:AT2G24570]
WRKY	AT5G46350	0.261899	-0.197121	0.340511	0.521208	WRKY8	WRKY DNA-binding protein 8 [Source:TAIR;Acc:AT5G46350]
WRKY	AT5G64810	-0.383706	-0.0831287	-0.546502	-0.573283	WRKY51	WRKY DNA-binding protein 51 [Source:TAIR;Acc:AT5G64810]
WRKY	AT5G15130	-5.16556e-05	0.077831	0.19942	0.00738977	WRKY72	WRKY DNA-binding protein 72 [Source:TAIR;Acc:AT5G15130]
WRKY	AT4G30935	-0.0426734	0.0602969	0.260342	0.249061	WRKY32	WRKY DNA-binding protein 32 [Source:TAIR;Acc:AT4G30935]
WRKY	AT5G24110	-0.436531	-0.56889	-0.936528	0.00274202	WRKY30	WRKY DNA-binding protein 30 [Source:TAIR;Acc:AT5G24110]
WRKY	AT4G26640	-0.120681	-0.147876	0.040366	0.0428122	WRKY20	WRKY family transcription factor family protein [Source:TAIR;Acc:AT4G26640]
WRKY	AT1G66550			0.139279		WRKY67	WRKY DNA-binding protein 67 [Source:TAIR;Acc:AT1G66550]
WRKY	AT1G66600	-0.124016	-0.145336	-0.10986	0.0248072	WRKY63	ABA overly sensitive mutant 3 [Source:TAIR;Acc:AT1G66600]
WRKY	AT3G04670	0.060234	-0.0667467	0.282985	0.345992	WRKY39	WRKY DNA-binding protein 39 [Source:TAIR;Acc:AT3G04670]
bHLH	AT4G02590	0.189503	0.11611	0.109588	0.18751	UNE12	basic helix-loop-helix (bHLH) DNA-binding superfamily protein [Source:TAIR;Acc:AT4G02590]
bHLH	AT2G24260	-0.919559	-0.436392	0.00122754	-0.15405	LRL1	LJRHL1-like 1 [Source:TAIR;Acc:AT2G24260]
bHLH	AT1G03040	0.0188994	0.10364	0.0631132	0.0647361	BHLH7	basic helix-loop-helix (bHLH) DNA-binding superfamily protein [Source:TAIR;Acc:AT1G03040]
bHLH	AT3G56980	-0.079222	-0.0977177	-0.146475	-0.15309	BHLH039	basic helix-loop-helix (bHLH) DNA-binding superfamily protein [Source:TAIR;Acc:AT3G56980]
bHLH	AT4G17880	1.21138	0.861555	-0.439172	0.130552	BHLH4	Basic helix-loop-helix (bHLH) DNA-binding family protein [Source:TAIR;Acc:AT4G17880]
bHLH	AT1G25330	-0.320839	-0.00195302	-0.422242	-0.115795	BHLH75	basic helix-loop-helix (bHLH) DNA-binding superfamily protein [Source:TAIR;Acc:AT1G25330]
bHLH	AT2G16910	0.716545	0.490665	-0.257208	-0.25983	AMS	basic helix-loop-helix (bHLH) DNA-binding superfamily protein [Source:TAIR;Acc:AT2G16910]
bHLH	AT4G14410	-0.268034	-0.130405	0.320837	0.300615	bHLH104	basic helix-loop-helix (bHLH) DNA-binding superfamily protein [Source:TAIR;Acc:AT4G14410]
bHLH	AT2G41240	0.765925	0.671265	-0.0471661	0.0575213	BHLH100	basic helix-loop-helix protein 100 [Source:TAIR;Acc:AT2G41240]
bHLH	AT3G62090	-0.0670944	-0.230931	0.592053	0.551085	PIL2	phytochrome interacting factor 3-like 2 [Source:TAIR;Acc:AT3G62090]
bHLH	AT5G09750	0.365293	0.0559306	0.258825	-0.0527018	HEC3	basic helix-loop-helix (bHLH) DNA-binding superfamily protein [Source:TAIR;Acc:AT5G09750]
bHLH	AT3G22100	0.308721	0.282651	1.03247	0.630135	BHLH117	basic helix-loop-helix (bHLH) DNA-binding superfamily protein [Source:TAIR;Acc:AT3G22100]
bHLH	AT2G40200	0.719217	0.533274	-0.131692	-0.00342803	BHLH51	basic helix-loop-helix (bHLH) DNA-binding superfamily protein [Source:TAIR;Acc:AT2G40200]
bHLH	AT4G09180	0.0110803	0.0573246	-0.336809	-0.325224	BHLH81	basic helix-loop-helix (bHLH) DNA-binding superfamily protein [Source:TAIR;Acc:AT4G09180]
bHLH	AT2G18300	0.749298	0.243157	1.98896	2.46585	BHLH64	basic helix-loop-helix (bHLH) DNA-binding superfamily protein [Source:TAIR;Acc:AT2G18300]
bHLH	AT3G28857	-0.988253	-0.253447	-1.73301	-1.51374	AT3G28857	basic helix-loop-helix (bHLH) DNA-binding family protein [Source:TAIR;Acc:AT3G28857]
bHLH	AT2G22750	0.218677	-0.123227	-0.231248	-0.259833	BHLH18	basic helix-loop-helix (bHLH) DNA-binding superfamily protein [Source:TAIR;Acc:AT2G22750]
bHLH	AT3G61950	-0.204468	0.0247146	-0.347989	-0.248961	BHLH67	basic helix-loop-helix (bHLH) DNA-binding superfamily protein [Source:TAIR;Acc:AT3G61950]
bHLH	AT5G01310	0.364954	0.149039	0.148054	0.159097	APTX	APRATAXIN-like [Source:TAIR;Acc:AT5G01310]
bHLH	AT5G10570	0.637621	0.276902	0.912214	0.773648	BHLH61	basic helix-loop-helix (bHLH) DNA-binding superfamily protein [Source:TAIR;Acc:AT5G10570]
bHLH	AT1G10610	0.419105	0.107676	1.0684	1.0517	BHLH90	basic helix-loop-helix (bHLH) DNA-binding superfamily protein [Source:TAIR;Acc:AT1G10610]
bHLH	AT1G68240	-0.448758	-0.284355	-0.419252	-0.489184	BHLH109	basic helix-loop-helix (bHLH) DNA-binding superfamily protein [Source:TAIR;Acc:AT1G68240]
bHLH	AT3G19500	-0.981827	-0.589621	0.26327	-0.0474739	BHLH113	basic helix-loop-helix (bHLH) DNA-binding superfamily protein [Source:TAIR;Acc:AT3G19500]
bHLH	AT1G05710	0.00581792	-0.0256195	-0.424068	-0.372025	AT1G05710	basic helix-loop-helix (bHLH) DNA-binding superfamily protein [Source:TAIR;Acc:AT1G05710]
bHLH	AT1G15790	-0.000829866	0.0872502	-0.040908	-0.218456	AT1G15790	unknown protein; BEST Arabidopsis thaliana protein match is: unknown protein (TAIR:AT1G15780.1); Has 170 Blast hits to 94 proteins in 14 species: Archae - 0; Bacteria - 0; Metazoa - 0; Fungi - 0; Plants - 170; Viruses - 0; Other Eukaryotes - 0 (sour /.../BI BLink). [Source:TAIR;Acc:AT1G15790]
bHLH	AT4G28811	-0.276204	-0.118926	0.77929	0.521443	BHLH119	basic helix-loop-helix (bHLH) DNA-binding superfamily protein [Source:TAIR;Acc:AT4G28811]
bHLH	AT1G74500	0.296375	0.165971			ATBS1	activation-tagged BRI1(brassinosteroid-insensitive 1)-suppressor 1 [Source:TAIR;Acc:AT1G74500]
bHLH	AT4G20970	-0.409707	-0.228082	-1.26558	-0.793535	AT4G20970	basic helix-loop-helix (bHLH) DNA-binding superfamily protein [Source:TAIR;Acc:AT4G20970]
bHLH	AT5G65320	-0.0999342	-0.064593	-0.220237	-0.353214	BHLH99	basic helix-loop-helix (bHLH) DNA-binding superfamily protein [Source:TAIR;Acc:AT5G65320]
bHLH	AT1G12540	0.403168	0.0606277	0.0925513	0.104928	BHLH55	basic helix-loop-helix (bHLH) DNA-binding superfamily protein [Source:TAIR;Acc:AT1G12540]
bHLH	AT2G41130	0.61078	0.219266	0.150022	0.156955	BHLH106	basic helix-loop-helix (bHLH) DNA-binding superfamily protein [Source:TAIR;Acc:AT2G41130]
bHLH	AT1G31050	-1.24797	-0.249375	-0.306357	-0.249205	BHLH111	basic helix-loop-helix (bHLH) DNA-binding superfamily protein [Source:TAIR;Acc:AT1G31050]
bHLH	AT2G14760					BHLH84	basic helix-loop-helix (bHLH) DNA-binding superfamily protein [Source:TAIR;Acc:AT2G14760]
bHLH	AT5G56960	0.250645	-0.0658022	-0.50587	-0.241463	BHLH41	basic helix-loop-helix (bHLH) DNA-binding family protein [Source:TAIR;Acc:AT5G56960]
bHLH	AT1G02340	-0.651213	-0.31082	-0.371848	-0.251117	HFR1	basic helix-loop-helix (bHLH) DNA-binding superfamily protein [Source:TAIR;Acc:AT1G02340]
bHLH	AT1G63650	0.711371	0.543401	-0.129598	0.00541521	EGL3	basic helix-loop-helix (bHLH) DNA-binding superfamily protein [Source:TAIR;Acc:AT1G63650]
bHLH	AT3G56970	-0.109566	-0.0625276	-0.0965111	0.00683947	BHLH038	basic helix-loop-helix (bHLH) DNA-binding superfamily protein [Source:TAIR;Acc:AT3G56970]
bHLH	AT1G27660	-0.316138	-0.161252	-0.257374	-0.234213	BHLH110	basic helix-loop-helix (bHLH) DNA-binding superfamily protein [Source:TAIR;Acc:AT1G27660]
bHLH	AT1G22490	0.454156	0.178476	0.5498	0.794066	BHLH94	basic helix-loop-helix (bHLH) DNA-binding superfamily protein [Source:TAIR;Acc:AT1G22490]
bHLH	AT1G10586	0.110199	0.06156		0.105418	AT1G10586	basic helix-loop-helix (bHLH) DNA-binding superfamily protein [Source:TAIR;Acc:AT1G10586]
bHLH	AT1G30670	-1.13949	-0.0770771	-0.748705	-1.08683	BHLH52	basic helix-loop-helix (bHLH) DNA-binding superfamily protein [Source:TAIR;Acc:AT1G30670]
bHLH	AT3G20640	-0.383845	0.0920794	-0.645046	-0.423791	BHLH123	basic helix-loop-helix (bHLH) DNA-binding superfamily protein [Source:TAIR;Acc:AT3G20640]
bHLH	AT1G69010	-0.182889	-0.0791192	-0.172438	-0.28683	BIM2	BES1-interacting Myc-like protein 2 [Source:TAIR;Acc:AT1G69010]
bHLH	AT2G22760	0.81528	0.190584	1.9989	1.72303	BHLH19	basic helix-loop-helix (bHLH) DNA-binding superfamily protein [Source:TAIR;Acc:AT2G22760]
bHLH	AT1G73830	0.422842	0.333284	-0.328498	0.371407	BEE3	BR enhanced expression 3 [Source:TAIR;Acc:AT1G73830]
bHLH	AT1G32640	-0.352423	0.0098485	0.515013	0.32535	ATMYC2	Basic helix-loop-helix (bHLH) DNA-binding family protein [Source:TAIR;Acc:AT1G32640]
bHLH	AT3G06120	-0.111415	-0.337458	-0.338975	-0.596656	MUTE	basic helix-loop-helix (bHLH) DNA-binding superfamily protein [Source:TAIR;Acc:AT3G06120]
bHLH	AT1G05805	0.496357	0.166313	0.453257	0.678076	BHLH128	basic helix-loop-helix (bHLH) DNA-binding superfamily protein [Source:TAIR;Acc:AT1G05805]
bHLH	AT4G01460	-0.494185	-0.468891	0.662898	0.458557	BHLH57	basic helix-loop-helix (bHLH) DNA-binding superfamily protein [Source:TAIR;Acc:AT4G01460]
bHLH	AT4G00120	1.761	0.715497	-0.242727	-0.0881981	IND1	basic helix-loop-helix (bHLH) DNA-binding superfamily protein [Source:TAIR;Acc:AT4G00120]
bHLH	AT4G21330	0.454018	0.521992	0.213909	0.828945	DYT1	basic helix-loop-helix (bHLH) DNA-binding superfamily protein [Source:TAIR;Acc:AT4G21330]
bHLH	AT5G62610	-0.272143	-0.147411	-0.067004	0.014038	BHLH79	basic helix-loop-helix (bHLH) DNA-binding superfamily protein [Source:TAIR;Acc:AT5G62610]
bHLH	AT2G31215	0.0050451	-0.110413	0.0282603	0.270087	AT2G31215	basic helix-loop-helix (bHLH) DNA-binding superfamily protein [Source:TAIR;Acc:AT2G31215]
bHLH	AT5G54680	0.0117383	-0.0356078	0.0448844	0.0334022	ILR3	basic helix-loop-helix (bHLH) DNA-binding superfamily protein [Source:TAIR;Acc:AT5G54680]
bHLH	AT5G67060	0.629605	0.566076	-0.257662	-0.257186	HEC1	basic helix-loop-helix (bHLH) DNA-binding superfamily protein [Source:TAIR;Acc:AT5G67060]
bHLH	AT1G29950	-0.0866317	0.0173179	-0.183565	-0.122617	BHLH144	basic helix-loop-helix (bHLH) DNA-binding superfamily protein [Source:TAIR;Acc:AT1G29950]
bHLH	AT3G06590	0.129592	0.255432	-0.073354	0.00419746	BHLH148	basic helix-loop-helix (bHLH) DNA-binding superfamily protein [Source:TAIR;Acc:AT3G06590]
bHLH	AT4G36060	0.3168	0.518824	0.840658	0.767074	bHLH11	basic helix-loop-helix (bHLH) DNA-binding superfamily protein [Source:TAIR;Acc:AT4G36060]
bHLH	AT1G72210	0.254741	0.33019	-0.460823	-0.45041	BHLH96	basic helix-loop-helix (bHLH) DNA-binding superfamily protein [Source:TAIR;Acc:AT1G72210]
bHLH	AT5G51790	0.860338	-0.236629	1.36147	1.79263	BHLH120	basic helix-loop-helix (bHLH) DNA-binding superfamily protein [Source:TAIR;Acc:AT5G51790]
bHLH	AT5G67110	0.371842	0.238592	0.512158	0.226263	ALC	basic helix-loop-helix (bHLH) DNA-binding superfamily protein [Source:TAIR;Acc:AT5G67110]
bHLH	AT2G20180	0.0514948	-0.0875105	0.677598	0.651469	PIL5	phytochrome interacting factor 3-like 5 [Source:TAIR;Acc:AT2G20180]
bHLH	AT5G43175	0.110199				BHLH139	basic helix-loop-helix (bHLH) DNA-binding superfamily protein [Source:TAIR;Acc:AT5G43175]
bHLH	AT1G68810	0.380424	0.274185	-0.0261028	0.117948	BHLH30	basic helix-loop-helix (bHLH) DNA-binding superfamily protein [Source:TAIR;Acc:AT1G68810]
bHLH	AT1G10120	0.23708	0.0913526	0.0387787	0.209084	BHLH74	basic helix-loop-helix (bHLH) DNA-binding superfamily protein [Source:TAIR;Acc:AT1G10120]
bHLH	AT5G46760	0.920271	0.408455	0.742085	0.878593	ATR2	Basic helix-loop-helix (bHLH) DNA-binding family protein [Source:TAIR;Acc:AT5G46760]
bHLH	AT4G29930	0.419038	0.268667	-0.319173	-0.654438	BHLH27	basic helix-loop-helix (bHLH) DNA-binding superfamily protein [Source:TAIR;Acc:AT4G29930]
bHLH	AT4G21340					B70	basic helix-loop-helix (bHLH) DNA-binding superfamily protein [Source:TAIR;Acc:AT4G21340]
bHLH	AT4G36540	-0.244229	-0.0206205	0.16902	0.527016	BEE2	BR enhanced expression 2 [Source:TAIR;Acc:AT4G36540]
bHLH	AT3G24140	-0.204483	0.0364935	-0.386352	-0.268043	FMA	basic helix-loop-helix (bHLH) DNA-binding superfamily protein [Source:TAIR;Acc:AT3G24140]
bHLH	AT3G56770	0.18552	0.263224	0.242695	0.224022	BHLH107	basic helix-loop-helix (bHLH) DNA-binding superfamily protein [Source:TAIR;Acc:AT3G56770]
bHLH	AT5G46830	0.96301	0.31091	-0.632683	-0.761738	ATNIG1	NACL-inducible gene 1 [Source:TAIR;Acc:AT5G46830]
bHLH	AT1G59640	-1.24555	-0.298926	-1.13164	-0.831588	ZCW32	BIG PETAL P [Source:TAIR;Acc:AT1G59640]
bHLH	AT1G68920	0.395607	0.233476	0.468752	0.504256	BHLH49	basic helix-loop-helix (bHLH) DNA-binding superfamily protein [Source:TAIR;Acc:AT1G68920]
bHLH	AT5G46690	-0.0286933	0.199391	0.225677	0.223977	bHLH071	beta HLH protein 71 [Source:TAIR;Acc:AT5G46690]
bHLH	AT1G09530	0.227635	0.0975667	0.550368	0.650367	PIF3	phytochrome interacting factor 3 [Source:TAIR;Acc:AT1G09530]
bHLH	AT2G28160	-0.304276	-0.145234	0.530406	0.328152	FIT1	FER-like regulator of iron uptake [Source:TAIR;Acc:AT2G28160]
bHLH	AT3G25710	-0.561039	-0.331703	-0.715732	-0.471396	BHLH32	basic helix-loop-helix 32 [Source:TAIR;Acc:AT3G25710]
bHLH	AT2G22770	1.28836	0.980861	1.26894	1.57455	NAI1	basic helix-loop-helix (bHLH) DNA-binding superfamily protein [Source:TAIR;Acc:AT2G22770]
bHLH	AT1G12860	-0.0142036	-0.0169395	0.141485	0.313361	SCRM2	basic helix-loop-helix (bHLH) DNA-binding superfamily protein [Source:TAIR;Acc:AT1G12860]
bHLH	AT1G18400	0.142856	0.00394172	-0.545879	0.0917208	BEE1	BR enhanced expression 1 [Source:TAIR;Acc:AT1G18400]
bHLH	AT3G19860	-0.182258	-0.195005	0.994661	1.01205	bHLH121	basic helix-loop-helix (bHLH) DNA-binding superfamily protein [Source:TAIR;Acc:AT3G19860]
bHLH	AT1G49770	-0.109566	-0.0018811	0.541759	0.13747	RGE1	basic helix-loop-helix (bHLH) DNA-binding superfamily protein [Source:TAIR;Acc:AT1G49770]
bHLH	AT1G66470	-0.108956	-0.0620626	0.103604	-0.0965112	RHD6	ROOT HAIR DEFECTIVE6 [Source:TAIR;Acc:AT1G66470]
bHLH	AT1G25310		0.06156	0.0878283	0.105418	MEE8	basic helix-loop-helix (bHLH) DNA-binding family protein [Source:TAIR;Acc:AT1G25310]
bHLH	AT4G00050	-0.747376	-0.60251	-1.24602	-1.17916	UNE10	basic helix-loop-helix (bHLH) DNA-binding superfamily protein [Source:TAIR;Acc:AT4G00050]
bHLH	AT1G06170	0.580684	0.484273	-0.461086	-0.41486	BHLH89	basic helix-loop-helix (bHLH) DNA-binding superfamily protein [Source:TAIR;Acc:AT1G06170]
bHLH	AT1G26260	-0.119448	-0.129402	0.122635	0.157471	CIB5	cryptochrome-interacting basic-helix-loop-helix 5 [Source:TAIR;Acc:AT1G26260]
bHLH	AT5G15160	-0.0607895	0.521408	-0.795352	-0.787615	BNQ2	BANQUO 2 [Source:TAIR;Acc:AT5G15160]
bHLH	AT2G34820	-1.1148	-0.565246	-0.553672	-1.32404	BHLH53	basic helix-loop-helix (bHLH) DNA-binding superfamily protein [Source:TAIR;Acc:AT2G34820]
bHLH	AT4G33880					RSL2	ROOT HAIR DEFECTIVE 6-LIKE 2 [Source:TAIR;Acc:AT4G33880]
bHLH	AT1G61660	-1.07673	-0.493969	-0.417136	-0.267357	BHLH112	basic helix-loop-helix (bHLH) DNA-binding superfamily protein [Source:TAIR;Acc:AT1G61660]
bHLH	AT4G37850	-0.4375	-0.158539	-0.505939	-0.777105	BHLH25	basic helix-loop-helix (bHLH) DNA-binding superfamily protein [Source:TAIR;Acc:AT4G37850]
bHLH	AT5G43650	-0.152967	-0.00464116	-0.101019	-0.0448722	BHLH92	basic helix-loop-helix (bHLH) DNA-binding superfamily protein [Source:TAIR;Acc:AT5G43650]
bHLH	AT3G57800	-0.0196117	0.0437908	-0.0302066	0.456445	BHLH60	basic helix-loop-helix (bHLH) DNA-binding superfamily protein [Source:TAIR;Acc:AT3G57800]
bHLH	AT1G01260	-0.0739566	0.0184445	-0.182287	-0.280163	BHLH13	basic helix-loop-helix (bHLH) DNA-binding superfamily protein [Source:TAIR;Acc:AT1G01260]
bHLH	AT5G58010	-0.428232	-0.286999	0.0180096	-0.342826	LRL3	LJRHL1-like 3 [Source:TAIR;Acc:AT5G58010]
bHLH	AT4G09820	-1.26536	-0.480031	0.0994426	0.109301	TT8	basic helix-loop-helix (bHLH) DNA-binding superfamily protein [Source:TAIR;Acc:AT4G09820]
bHLH	AT4G00480	0.290623	0.125808	0.580842	0.96786	ATMYC1	basic helix-loop-helix (bHLH) DNA-binding superfamily protein [Source:TAIR;Acc:AT4G00480]
bHLH	AT4G36930	0.786481	0.375447	0.90094	0.915508	SPT	basic helix-loop-helix (bHLH) DNA-binding superfamily protein [Source:TAIR;Acc:AT4G36930]
bHLH	AT5G57150	0.788779	0.646637	0.0656687	0.17062	BHLH35	basic helix-loop-helix (bHLH) DNA-binding superfamily protein [Source:TAIR;Acc:AT5G57150]
bHLH	AT1G51140	-0.954854	-0.45099	0.162296	-0.142265	BHLH122	basic helix-loop-helix (bHLH) DNA-binding superfamily protein [Source:TAIR;Acc:AT1G51140]
bHLH	AT2G31280	-0.177431	0.119104	0.171615	0.216465	CPUORF7	conserved peptide upstream open reading frame 7 [Source:TAIR;Acc:AT2G31280]
bHLH	AT5G65640	0.38753	0.386173	-0.290191	-0.00395112	bHLH093	beta HLH protein 93 [Source:TAIR;Acc:AT5G65640]
bHLH	AT2G46970	-0.132457	0.0321289	-1.38049	-1.72085	PIL1	phytochrome interacting factor 3-like 1 [Source:TAIR;Acc:AT2G46970]
bHLH	AT3G47710					BNQ3	BANQUO 3 [Source:TAIR;Acc:AT3G47710]
bHLH	AT2G31220	0.859567	0.530455	0.236946	0.317782	BHLH10	basic helix-loop-helix (bHLH) DNA-binding superfamily protein [Source:TAIR;Acc:AT2G31220]
bHLH	AT3G59060	0.022519	0.0384225	0.354043	0.465551	PIL6	phytochrome interacting factor 3-like 6 [Source:TAIR;Acc:AT3G59060]
bHLH	AT2G31730	0.0296343	-0.201696	-0.368992	-0.177813	AT2G31730	basic helix-loop-helix (bHLH) DNA-binding superfamily protein [Source:TAIR;Acc:AT2G31730]
bHLH	AT5G37800	-1.53499	-0.648079	-0.931299	-1.02162	RSL1	RHD SIX-LIKE 1 [Source:TAIR;Acc:AT5G37800]
bHLH	AT4G29100	-0.0524155	-0.0338832	-0.0113689	0.00239801	BHLH68	basic helix-loop-helix (bHLH) DNA-binding superfamily protein [Source:TAIR;Acc:AT4G29100]
bHLH	AT4G38070	0.40388	0.27109	0.0530089	-0.0266424	BHLH131	basic helix-loop-helix (bHLH) DNA-binding superfamily protein [Source:TAIR;Acc:AT4G38070]
bHLH	AT1G10585	-0.0985527	-0.064593	-0.127908	0.0174765	AT1G10585	basic helix-loop-helix (bHLH) DNA-binding superfamily protein [Source:TAIR;Acc:AT1G10585]
bHLH	AT2G42300	-0.415333	-0.284232	-0.28929	-0.111933	BHLH48	basic helix-loop-helix (bHLH) DNA-binding superfamily protein [Source:TAIR;Acc:AT2G42300]
bHLH	AT1G26945	-1.30058	-0.472244	-1.39017	-1.42197	KDR	basic helix-loop-helix (bHLH) DNA-binding superfamily protein [Source:TAIR;Acc:AT1G26945]
bHLH	AT5G51780	0.956776	0.137617	0.159132	-0.622643	BHLH36	basic helix-loop-helix (bHLH) DNA-binding superfamily protein [Source:TAIR;Acc:AT5G51780]
bHLH	AT5G04150	0.403133		0.583375		BHLH101	basic helix-loop-helix (bHLH) DNA-binding superfamily protein [Source:TAIR;Acc:AT5G04150]
bHLH	AT2G43010	0.376818	0.334844	1.72432	1.64309	PIF4	phytochrome interacting factor 4 [Source:TAIR;Acc:AT2G43010]
bHLH	AT1G27740					RSL4	root hair defective 6-like 4 [Source:TAIR;Acc:AT1G27740]
bHLH	AT4G16430	0.171082	0.184904	-0.230943	-0.136047	BHLH3	basic helix-loop-helix (bHLH) DNA-binding superfamily protein [Source:TAIR;Acc:AT4G16430]
bHLH	AT1G71200	-0.688375	-0.263439	-0.106135	-0.782353	AT1G71200	basic helix-loop-helix (bHLH) DNA-binding superfamily protein [Source:TAIR;Acc:AT1G71200]
bHLH	AT4G25400	0.244782	0.272297	-0.00238907	0.00683947	AT4G25400	basic helix-loop-helix (bHLH) DNA-binding superfamily protein [Source:TAIR;Acc:AT4G25400]
bHLH	AT3G47640	-0.717045	-0.38146	0.0713235	-0.253281	PYE	basic helix-loop-helix (bHLH) DNA-binding superfamily protein [Source:TAIR;Acc:AT3G47640]
bHLH	AT2G31210	0.506814	0.534237	-0.225407	-0.0331248	BHLH91	basic helix-loop-helix (bHLH) DNA-binding superfamily protein [Source:TAIR;Acc:AT2G31210]
bHLH	AT1G35460	0.140284	0.256421	0.388888	0.509778	BHLH80	basic helix-loop-helix (bHLH) DNA-binding superfamily protein [Source:TAIR;Acc:AT1G35460]
bHLH	AT4G28800	-0.571106	-0.107119	0.769337	0.914022	BHLH56	basic helix-loop-helix (bHLH) DNA-binding superfamily protein [Source:TAIR;Acc:AT4G28800]
bHLH	AT4G05170	0.133081	-0.0018811	0.197385	0.240777	BHLH114	basic helix-loop-helix (bHLH) DNA-binding superfamily protein [Source:TAIR;Acc:AT4G05170]
bHLH	AT5G38860	-0.250776	-0.119943	0.788693	0.786867	BIM3	BES1-interacting Myc-like protein 3 [Source:TAIR;Acc:AT5G38860]
bHLH	AT5G50915	0.38128	0.173593	-0.68766	-0.965298	BHLH137	basic helix-loop-helix (bHLH) DNA-binding superfamily protein [Source:TAIR;Acc:AT5G50915]
bHLH	AT3G21330	-1.16026	-0.668407	-0.334698	-0.595397	BHLH87	basic helix-loop-helix (bHLH) DNA-binding superfamily protein [Source:TAIR;Acc:AT3G21330]
bHLH	AT4G30980	0.140879	0.00457595	-0.517819	-0.993498	LRL2	LJRHL1-like 2 [Source:TAIR;Acc:AT4G30980]
bHLH	AT3G26744	0.184562	0.047923	0.177302	0.0812932	ICE1	basic helix-loop-helix (bHLH) DNA-binding superfamily protein [Source:TAIR;Acc:AT3G26744]
bHLH	AT5G61270	0.373404	0.21299	1.05351	1.58747	PIF7	phytochrome-interacting factor7 [Source:TAIR;Acc:AT5G61270]
bHLH	AT3G23210	-0.527621	-0.409946	-0.50762	-0.742038	bHLH34	basic helix-loop-helix (bHLH) DNA-binding superfamily protein [Source:TAIR;Acc:AT3G23210]
bHLH	AT5G41315	1.51903	0.94628	0.660608	0.584661	GL3	basic helix-loop-helix (bHLH) DNA-binding superfamily protein [Source:TAIR;Acc:AT5G41315]
bHLH	AT5G08130	0.0194609	0.0344418	-0.134806	-0.200816	BIM1	basic helix-loop-helix (bHLH) DNA-binding superfamily protein [Source:TAIR;Acc:AT5G08130]
bHLH	AT2G42280	-0.473887	-0.245936	-0.160224	0.149319	BHLH130	basic helix-loop-helix (bHLH) DNA-binding superfamily protein [Source:TAIR;Acc:AT2G42280]
bHLH	AT2G46510	-0.062013	0.0741244	0.114517	-0.0472832	ATAIB	ABA-inducible BHLH-type transcription factor [Source:TAIR;Acc:AT2G46510]
bHLH	AT5G53210	-0.388335	-0.0149869	-0.21297	0.0907926	SPCH	basic helix-loop-helix (bHLH) DNA-binding superfamily protein [Source:TAIR;Acc:AT5G53210]
bHLH	AT4G00870	-0.0562385	0.543413	-0.43775	-0.483881	BHLH14	basic helix-loop-helix (bHLH) DNA-binding superfamily protein [Source:TAIR;Acc:AT4G00870]
bHLH	AT3G07340	0.824229	0.734264	-0.277464	0.413156	BHLH62	basic helix-loop-helix (bHLH) DNA-binding superfamily protein [Source:TAIR;Acc:AT3G07340]
bHLH	AT4G34530	-0.00777679	-0.0962083	0.401078	0.428911	CIB1	cryptochrome-interacting basic-helix-loop-helix 1 [Source:TAIR;Acc:AT4G34530]
bHLH	AT4G28815	0.13473	0.0821935	0.222959	0.56446	BHLH127	basic helix-loop-helix (bHLH) DNA-binding superfamily protein [Source:TAIR;Acc:AT4G28815]
bHLH	AT1G51070	0.0556505	0.00152028	-0.268157	-0.295659	bHLH115	basic helix-loop-helix (bHLH) DNA-binding superfamily protein [Source:TAIR;Acc:AT1G51070]
bHLH	AT3G50330	1.96434	1.08966	0.199644	0.0361164	HEC2	basic helix-loop-helix (bHLH) DNA-binding superfamily protein [Source:TAIR;Acc:AT3G50330]
bHLH	AT1G62975	1.11209	0.557719	-0.201585	-0.0756731	AT1G62975	basic helix-loop-helix (bHLH) DNA-binding superfamily protein [Source:TAIR;Acc:AT1G62975]
bHLH	AT2G46810	-0.0966833	-0.0502522	0.399789	0.254931	BHLH70	basic helix-loop-helix (bHLH) DNA-binding superfamily protein [Source:TAIR;Acc:AT2G46810]
bHLH	AT5G48560	2.40596	1.42592	-0.564803	-0.125016	BHLH78	basic helix-loop-helix (bHLH) DNA-binding superfamily protein [Source:TAIR;Acc:AT5G48560]
bHLH	AT4G28790	-0.571059	0.0165259	0.075332	0.177311	AT4G28790	basic helix-loop-helix (bHLH) DNA-binding superfamily protein [Source:TAIR;Acc:AT4G28790]
bHLH	AT2G43140	0.976469	-0.00407993	-0.0159173	0.209868	BHLH129	basic helix-loop-helix (bHLH) DNA-binding superfamily protein [Source:TAIR;Acc:AT2G43140]
bHLH	AT3G23690	0.559963	0.387674	-0.0983294	0.162106	BHLH77	basic helix-loop-helix (bHLH) DNA-binding superfamily protein [Source:TAIR;Acc:AT3G23690]
bHLH	AT4G25410	-0.614413	-0.355582	0.247417	0.201817	BHLH126	basic helix-loop-helix (bHLH) DNA-binding superfamily protein [Source:TAIR;Acc:AT4G25410]
bHLH	AT5G39860	-0.41346	0.112478	-1.16568	-1.28105	PRE1	basic helix-loop-helix (bHLH) DNA-binding family protein [Source:TAIR;Acc:AT5G39860]
HB-PHD	AT3G19510	0.106616	0.108758	-0.124713	-0.162644	HAT3.1	Homeodomain-like protein with RING/FYVE/PHD-type zinc finger domain [Source:TAIR;Acc:AT3G19510]
HB-PHD	AT4G29940	0.109183	0.179463	0.318076	0.402481	PRHA	pathogenesis related homeodomain protein A [Source:TAIR;Acc:AT4G29940]
LBD	AT4G00220	-0.551553	-0.137042	-0.740915	-0.549034	LBD30	Lateral organ boundaries (LOB) domain family protein [Source:TAIR;Acc:AT4G00220]
LBD	AT2G30130		0.118571	0.505824	0.952236	ASL5	Lateral organ boundaries (LOB) domain family protein [Source:TAIR;Acc:AT2G30130]
LBD	AT3G03760	0.680847	0.538646	-0.014427	-0.30309	LBD20	LOB domain-containing protein 20 [Source:TAIR;Acc:AT3G03760]
LBD	AT1G07900	-0.0929212	0.11049	0.050418	0.487884	LBD1	LOB domain-containing protein 1 [Source:TAIR;Acc:AT1G07900]
LBD	AT2G28500	-1.90075	-1.27802	-0.84143	-1.50009	LBD11	LOB domain-containing protein 11 [Source:TAIR;Acc:AT2G28500]
LBD	AT1G31320	0.466722	0.271344	-0.308654	-0.237795	LBD4	LOB domain-containing protein 4 [Source:TAIR;Acc:AT1G31320]
LBD	AT4G37540	0.192053	-0.338446	1.78674	1.5016	LBD39	LOB domain-containing protein 39 [Source:TAIR;Acc:AT4G37540]
LBD	AT3G02550	0.712074	0.390318	-0.0330584	0.182157	LBD41	LOB domain-containing protein 41 [Source:TAIR;Acc:AT3G02550]
LBD	AT3G27650	0.222824	0.181931	-0.644671	0.0957972	LBD25	LOB domain-containing protein 25 [Source:TAIR;Acc:AT3G27650]
LBD	AT3G49940	-0.304258	-0.346923	0.308394	0.567298	LBD38	LOB domain-containing protein 38 [Source:TAIR;Acc:AT3G49940]
LBD	AT5G63090	-0.808344	-0.441814	-0.64907	-0.711129	LOB	Lateral organ boundaries (LOB) domain family protein [Source:TAIR;Acc:AT5G63090]
LBD	AT1G68510	-0.243368	-0.210974	0.267267	-0.489184	LBD42	LOB domain-containing protein 42 [Source:TAIR;Acc:AT1G68510]
LBD	AT1G16530	0.23888	0.192348	0.297995	0.244836	LBD3	ASYMMETRIC LEAVES 2-like 9 [Source:TAIR;Acc:AT1G16530]
LBD	AT2G19820				0.104928	LBD9	LOB domain-containing protein 9 [Source:TAIR;Acc:AT2G19820]
LBD	AT3G11090	-0.417839	-0.0426635	-0.602989	-0.708933	LBD21	LOB domain-containing protein 21 [Source:TAIR;Acc:AT3G11090]
LBD	AT1G72980	-0.932752	-0.493314	-0.153527	-0.8955	LBD7	LOB domain-containing protein 7 [Source:TAIR;Acc:AT1G72980]
LBD	AT5G66870	-0.436184	-0.2506	-0.134507	-0.273148	ASL1	ASYMMETRIC LEAVES 2-like 1 [Source:TAIR;Acc:AT5G66870]
LBD	AT2G31310				0.105418	LBD14	LOB domain-containing protein 14 [Source:TAIR;Acc:AT2G31310]
LBD	AT2G23660	-1.45367	-0.786712	-0.456098	-0.815782	LBD10	LOB domain-containing protein 10 [Source:TAIR;Acc:AT2G23660]
LBD	AT2G45420	-0.889144	0.174741	-0.0641616	-0.179428	LBD18	LOB domain-containing protein 18 [Source:TAIR;Acc:AT2G45420]
LBD	AT2G45410	0.728141	0.391558	0.299926	0.148509	LBD19	LOB domain-containing protein 19 [Source:TAIR;Acc:AT2G45410]
LBD	AT1G65620	0.313968	0.181746	-0.198318	-0.190095	AS2	Lateral organ boundaries (LOB) domain family protein [Source:TAIR;Acc:AT1G65620]
LBD	AT1G67100	-0.252278	-0.277775	0.526694	0.420605	LBD40	LOB domain-containing protein 40 [Source:TAIR;Acc:AT1G67100]
LBD	AT1G36000				0.104928	LBD5	LOB domain-containing protein 5 [Source:TAIR;Acc:AT1G36000]
LBD	AT3G47870	-1.41911	-0.644099	-0.561571	-1.35416	SCP	LOB domain-containing protein 27 [Source:TAIR;Acc:AT3G47870]
LBD	AT2G42430	0.296375		0.24527		LBD16	lateral organ boundaries-domain 16 [Source:TAIR;Acc:AT2G42430]
LBD	AT2G40470	-0.92665	-0.323428	-0.529696	-0.231096	LBD15	LOB domain-containing protein 15 [Source:TAIR;Acc:AT2G40470]
LBD	AT5G35900	-0.164262	-0.0502906	-0.146467	-0.153506	LBD35	LOB domain-containing protein 35 [Source:TAIR;Acc:AT5G35900]
LBD	AT3G13850	-1.30199	-0.622036	-0.628744	-1.31728	LBD22	LOB domain-containing protein 22 [Source:TAIR;Acc:AT3G13850]
LBD	AT3G27940	0.389414	-0.0127587	2.08502	1.15843	LBD26	LOB domain-containing protein 26 [Source:TAIR;Acc:AT3G27940]
LBD	AT3G58190				0.105418	LBD29	lateral organ boundaries-domain 29 [Source:TAIR;Acc:AT3G58190]
LBD	AT5G15060	0.407131	0.190761	0.195624	-0.0201079	LBD34	Lateral organ boundaries (LOB) domain family protein [Source:TAIR;Acc:AT5G15060]
LBD	AT3G26620	-0.303597	-0.326529	-0.0356738	-0.373523	LBD23	LOB domain-containing protein 23 [Source:TAIR;Acc:AT3G26620]
LBD	AT3G50510	0.256841	0.174097	0.514501	-0.285943	LBD28	LOB domain-containing protein 28 [Source:TAIR;Acc:AT3G50510]
LBD	AT2G42440	0.403133	0.06156	0.0925513	0.499825	LBD17	Lateral organ boundaries (LOB) domain family protein [Source:TAIR;Acc:AT2G42440]
LBD	AT3G26660	0.165079	0.06156	0.0878283		LBD24	LOB domain-containing protein 24 [Source:TAIR;Acc:AT3G26660]
LBD	AT5G06080					LBD33	LOB domain-containing protein 33 [Source:TAIR;Acc:AT5G06080]
LBD	AT5G67420	0.404298	0.21998	0.835646	1.27099	LBD37	LOB domain-containing protein 37 [Source:TAIR;Acc:AT5G67420]
LBD	AT4G22700					LBD32	LOB domain-containing protein 32 [Source:TAIR;Acc:AT4G22700]
LBD	AT1G06280	0.832663	0.560526	-0.300408	-0.225972	LBD2	LOB domain-containing protein 2 [Source:TAIR;Acc:AT1G06280]
LBD	AT4G00210	-0.038907	-0.0429092	-0.135337	-0.0996118	LBD31	LOB domain-containing protein 31 [Source:TAIR;Acc:AT4G00210]
LBD	AT2G30340	0.06663	0.198019	0.248654	0.101682	LBD13	LOB domain-containing protein 13 [Source:TAIR;Acc:AT2G30340]
LBD	AT2G19510			0.0878283	0.38159	LBD8	LOB domain-containing protein 8 [Source:TAIR;Acc:AT2G19510]
AP2	AT4G36920	0.203515	0.324505	-0.466291	-0.0828557	AP2	Integrase-type DNA-binding superfamily protein [Source:TAIR;Acc:AT4G36920]
AP2	AT5G17430		0.229221	0.441175	0.204987	BBM	Integrase-type DNA-binding superfamily protein [Source:TAIR;Acc:AT5G17430]
AP2	AT3G54320	-0.460956	-0.372094	-0.119478	-0.0859934	WRI1	Integrase-type DNA-binding superfamily protein [Source:TAIR;Acc:AT3G54320]
AP2	AT3G54990	-0.169215	-0.202414	0.501912	0.271696	SMZ	Integrase-type DNA-binding superfamily protein [Source:TAIR;Acc:AT3G54990]
AP2	AT1G51190	0.585147	0.392603	0.49765	-0.0969405	PLT2	Integrase-type DNA-binding superfamily protein [Source:TAIR;Acc:AT1G51190]
AP2	AT2G41710	-0.0402728	-0.11279	0.766002	0.830091	AT2G41710	Integrase-type DNA-binding superfamily protein [Source:TAIR;Acc:AT2G41710]
AP2	AT5G65510	0.961014	0.363623	0.712487	0.395945	AIL7	AINTEGUMENTA-like 7 [Source:TAIR;Acc:AT5G65510]
AP2	AT2G28550	0.189868	-0.34754	0.170368	0.1567	RAP2.7	related to AP2.7 [Source:TAIR;Acc:AT2G28550]
AP2	AT3G20840	-0.124512	-0.14554	-0.22932	-0.207536	PLT1	Integrase-type DNA-binding superfamily protein [Source:TAIR;Acc:AT3G20840]
AP2	AT1G16060	-0.315105	-0.157143	-0.861975	-0.617837	ADAP	ARIA-interacting double AP2 domain protein [Source:TAIR;Acc:AT1G16060]
AP2	AT1G79700	-0.636027	-0.794877	1.48642	1.49531	AT1G79700	Integrase-type DNA-binding superfamily protein [Source:TAIR;Acc:AT1G79700]
AP2	AT5G10510	-0.0203115	0.114583	0.382356	0.226236	AIL6	AINTEGUMENTA-like 6 [Source:TAIR;Acc:AT5G10510]
AP2	AT2G39250	-1.2106	-0.400669	-1.04324	-1.03881	SNZ	Integrase-type DNA-binding superfamily protein [Source:TAIR;Acc:AT2G39250]
AP2	AT1G72570	0.636064	0.426438	0.145595	0.640485	AIL1	Integrase-type DNA-binding superfamily protein [Source:TAIR;Acc:AT1G72570]
AP2	AT5G57390	0.0571586	-0.144455	0.281697	0.288116	AIL5	AINTEGUMENTA-like 5 [Source:TAIR;Acc:AT5G57390]
AP2	AT5G67180	-0.171887	-0.144894	-0.892487	-0.581795	TOE3	target of early activation tagged (EAT) 3 [Source:TAIR;Acc:AT5G67180]
AP2	AT5G60120	0.343015	0.32011	0.213367	0.191928	TOE2	target of early activation tagged (EAT) 2 [Source:TAIR;Acc:AT5G60120]
AP2	AT4G37750	0.383426	-0.00893172	0.100565	0.12803	ANT	Integrase-type DNA-binding superfamily protein [Source:TAIR;Acc:AT4G37750]
Nin-like	AT4G24020	-0.0115096	-0.123857	0.673529	0.723308	NLP7	NIN like protein 7 [Source:TAIR;Acc:AT4G24020]
Nin-like	AT1G76350	0.032296	-0.113492	-0.252898	-0.285636	NLP5	Plant regulator RWP-RK family protein [Source:TAIR;Acc:AT1G76350]
Nin-like	AT2G43500	-0.197589	-0.0833281	-0.0743804	-0.261547	NLP8	Plant regulator RWP-RK family protein [Source:TAIR;Acc:AT2G43500]
Nin-like	AT1G64530	0.00157428	-0.133246	-0.0859308	-0.0907694	NLP6	Plant regulator RWP-RK family protein [Source:TAIR;Acc:AT1G64530]
Nin-like	AT1G74480	-0.384963	-0.060353	0.327212	0.351678	RKD2	RWP-RK domain-containing protein [Source:TAIR;Acc:AT1G74480]
Nin-like	AT1G20640	0.0790726	0.139275	-0.0590289	0.00387072	NLP4	Plant regulator RWP-RK family protein [Source:TAIR;Acc:AT1G20640]
Nin-like	AT1G18790		0.0606277		0.279341	RKD1	RWP-RK domain-containing protein [Source:TAIR;Acc:AT1G18790]
Nin-like	AT5G53040	-0.294472	-0.169047	-0.0148871	-0.107596	RKD4	RWP-RK domain-containing protein [Source:TAIR;Acc:AT5G53040]
Nin-like	AT2G17150	0.297913	0.000685859	-0.0141792	0.106477	NLP1	Plant regulator RWP-RK family protein [Source:TAIR;Acc:AT2G17150]
Nin-like	AT5G66990				0.589161	RKD3	RWP-RK domain-containing protein [Source:TAIR;Acc:AT5G66990]
Nin-like	AT4G35270	0.0502393	0.210294	-0.134613	-0.16621	NLP2	Plant regulator RWP-RK family protein [Source:TAIR;Acc:AT4G35270]
Nin-like	AT4G38340	1.33218	0.947973	0.125989	0.708685	NLP3	Plant regulator RWP-RK family protein [Source:TAIR;Acc:AT4G38340]
Nin-like	AT3G59580	-0.125646	0.0277458	-0.292957	-0.798075	NLP9	Plant regulator RWP-RK family protein [Source:TAIR;Acc:AT3G59580]
Nin-like	AT4G35590	-0.38769	-0.168059	-0.0196093	-0.252913	RKD5	RWP-RK domain-containing protein [Source:TAIR;Acc:AT4G35590]
NF-YA	AT2G34720	-0.4835	-0.273426	-0.482191	-0.588604	NF-YA4	nuclear factor Y, subunit A4 [Source:TAIR;Acc:AT2G34720]
NF-YA	AT1G30500	-0.156851	-0.0372596	0.584269	0.398327	NF-YA7	nuclear factor Y, subunit A7 [Source:TAIR;Acc:AT1G30500]
NF-YA	AT3G05690	0.472596	0.14196	-1.1169	-1.20559	UNE8	nuclear factor Y, subunit A2 [Source:TAIR;Acc:AT3G05690]
NF-YA	AT1G54160	0.684133	0.58845	-0.208542	-0.323814	NFYA5	nuclear factor Y, subunit A5 [Source:TAIR;Acc:AT1G54160]
NF-YA	AT3G20910	-0.181158	-0.17119	-0.0321198	-0.0200619	NF-YA9	nuclear factor Y, subunit A9 [Source:TAIR;Acc:AT3G20910]
NF-YA	AT5G12840	-0.130711	-0.15868	0.255582	0.152872	HAP2A	nuclear factor Y, subunit A1 [Source:TAIR;Acc:AT5G12840]
NF-YA	AT1G17590	0.567343	0.0845508	-0.283291	-0.247435	NF-YA8	nuclear factor Y, subunit A8 [Source:TAIR;Acc:AT1G17590]
NF-YA	AT3G14020	1.22581	0.569859	-0.197255	0.334877	NF-YA6	nuclear factor Y, subunit A6 [Source:TAIR;Acc:AT3G14020]
NF-YA	AT5G06510	0.559918	0.272743	-2.11688	-1.72743	NF-YA10	nuclear factor Y, subunit A10 [Source:TAIR;Acc:AT5G06510]
NF-YA	AT1G72830	0.785254	0.567871	-0.30893	-0.0815651	HAP2C	nuclear factor Y, subunit A3 [Source:TAIR;Acc:AT1G72830]
Trihelix	AT2G38250	-0.925047	-0.547906	-0.264014	0.00968304	GT-3B	Homeodomain-like superfamily protein [Source:TAIR;Acc:AT2G38250]
Trihelix	AT3G14180	0.0800054	0.0543318	0.809692	0.70804	AT3G14180	sequence-specific DNA binding transcription factors [Source:TAIR;Acc:AT3G14180]
Trihelix	AT3G11100	0.0182635	-0.0748127	0.790562	0.79556	AT3G11100	sequence-specific DNA binding transcription factors [Source:TAIR;Acc:AT3G11100]
Trihelix	AT3G10000	-0.136201	-0.260446	-1.02485	-1.07904	EDA31	Homeodomain-like superfamily protein [Source:TAIR;Acc:AT3G10000]
Trihelix	AT3G24490	0.363176	0.255088	0.319126	0.356483	AT3G24490	Alcohol dehydrogenase transcription factor Myb/SANT-like family protein [Source:TAIR;Acc:AT3G24490]
Trihelix	AT5G28300	0.2704	0.302641	-0.361372	-0.0900457	AT5G28300	Duplicated homeodomain-like superfamily protein [Source:TAIR;Acc:AT5G28300]
Trihelix	AT4G31270	0.132501	-0.0705572	0.71891	0.767741	AT4G31270	sequence-specific DNA binding transcription factors [Source:TAIR;Acc:AT4G31270]
Trihelix	AT2G44730	0.140069	0.0146483	0.282608	0.347439	AT2G44730	Alcohol dehydrogenase transcription factor Myb/SANT-like family protein [Source:TAIR;Acc:AT2G44730]
Trihelix	AT5G01380	-0.589473	-0.418495	1.10605	1.08894	GT-3A	Homeodomain-like superfamily protein [Source:TAIR;Acc:AT5G01380]
Trihelix	AT2G33550	0.291018	0.200071	0.345214	0.0211617	AT2G33550	Homeodomain-like superfamily protein [Source:TAIR;Acc:AT2G33550]
Trihelix	AT1G76870	0.122482	0.132267	0.154308	0.319911	AT1G76870	BEST Arabidopsis thaliana protein match is: sequence-specific DNA binding transcription factors (TAIR:AT1G21200.1); Has 406 Blast hits to 351 proteins in 76 species: Archae - 0; Bacteria - 2; Metazoa - 137; Fungi - 14; Plants - 127; Viruses - 0; Oth /.../aryotes - 126 (source: NCBI BLink). [Source:TAIR;Acc:AT1G76870]
Trihelix	AT5G47660	0.405874	0.112873	0.686095	0.481146	AT5G47660	Homeodomain-like superfamily protein [Source:TAIR;Acc:AT5G47660]
Trihelix	AT3G58630	0.179929	-0.0509821	-0.120677	-0.229518	AT3G58630	sequence-specific DNA binding transcription factors [Source:TAIR;Acc:AT3G58630]
Trihelix	AT1G76880	-0.0172215	0.158242	-0.302585	-0.0285834	AT1G76880	Duplicated homeodomain-like superfamily protein [Source:TAIR;Acc:AT1G76880]
Trihelix	AT1G76890	-0.548867	-0.165098	-0.789371	-0.249697	GT2	Duplicated homeodomain-like superfamily protein [Source:TAIR;Acc:AT1G76890]
Trihelix	AT3G24860	0.546666	0.295063	0.283902	0.220987	AT3G24860	Homeodomain-like superfamily protein [Source:TAIR;Acc:AT3G24860]
Trihelix	AT5G63420	0.856879	0.492465	0.826859	0.90166	emb2746	RNA-metabolising metallo-beta-lactamase family protein [Source:TAIR;Acc:AT5G63420]
Trihelix	AT1G13450	0.0485306	0.131934	0.719114	0.891972	GT-1	Homeodomain-like superfamily protein [Source:TAIR;Acc:AT1G13450]
Trihelix	AT3G10040	1.42529	0.906901	-0.254242	0.180852	AT3G10040	sequence-specific DNA binding transcription factors [Source:TAIR;Acc:AT3G10040]
Trihelix	AT1G33240	-0.121736	0.0504497	-0.458421	-0.0886065	AT-GTL1	GT-2-like 1 [Source:TAIR;Acc:AT1G33240]
Trihelix	AT1G54060	0.347457	0.176385	0.444746	0.448002	ASIL1	6B-interacting protein 1-like 1 [Source:TAIR;Acc:AT1G54060]
Trihelix	AT5G05550	0.45215	0.125421	1.23966	1.22641	AT5G05550	sequence-specific DNA binding transcription factors [Source:TAIR;Acc:AT5G05550]
Trihelix	AT3G25990	-0.2188	-0.1635	0.238243	0.0823851	GT-4	Homeodomain-like superfamily protein [Source:TAIR;Acc:AT3G25990]
Trihelix	AT1G31310	-0.366569	-0.64356	1.1224	1.07158	AT1G31310	hydroxyproline-rich glycoprotein family protein [Source:TAIR;Acc:AT1G31310]
Trihelix	AT3G54390	-0.995808	-0.575805	-0.541689	-0.677845	AT3G54390	sequence-specific DNA binding transcription factors [Source:TAIR;Acc:AT3G54390]
Trihelix	AT2G35640	-1.04521	-0.879658	0.0599025	0.00169207	AT2G35640	Homeodomain-like superfamily protein [Source:TAIR;Acc:AT2G35640]
Trihelix	AT5G03680	0.135989	0.0996429	0.27136	0.0997873	PTL	Duplicated homeodomain-like superfamily protein [Source:TAIR;Acc:AT5G03680]
Trihelix	AT1G21200	0.294471	0.122066	-0.0893405	0.030058	AT1G21200	sequence-specific DNA binding transcription factors [Source:TAIR;Acc:AT1G21200]
Trihelix	AT3G10030	0.127303	0.0852356	0.959391	1.00602	AT3G10030	aspartate/glutamate/uridylate kinase family protein [Source:TAIR;Acc:AT3G10030]
G2-like	AT2G42660	-0.438071	-0.0374102	-0.0967487	-0.0964536	AT2G42660	Homeodomain-like superfamily protein [Source:TAIR;Acc:AT2G42660]
G2-like	AT2G40970	-0.23002	0.105675	0.67757	0.711252	MYBC1	Homeodomain-like superfamily protein [Source:TAIR;Acc:AT2G40970]
G2-like	AT2G03500	-0.47434	-0.0163025	-0.463595	-0.312095	AT2G03500	Homeodomain-like superfamily protein [Source:TAIR;Acc:AT2G03500]
G2-like	AT1G32240	0.335921	0.364404	-0.349496	-0.15753	KAN2	Homeodomain-like superfamily protein [Source:TAIR;Acc:AT1G32240]
G2-like	AT3G19070	0.294979	0.158364	0.374994	-0.149858	AT3G19070	Homeodomain-like superfamily protein [Source:TAIR;Acc:AT3G19070]
G2-like	AT4G28610	-0.299197	-0.203706	0.173515	0.169565	PHR1	phosphate starvation response 1 [Source:TAIR;Acc:AT4G28610]
G2-like	AT5G16560	0.471982	0.504512	0.303067	0.619836	KAN	Homeodomain-like superfamily protein [Source:TAIR;Acc:AT5G16560]
G2-like	AT3G10760	-0.0476884	0.0606556	-0.341745	-0.299743	AT3G10760	Homeodomain-like superfamily protein [Source:TAIR;Acc:AT3G10760]
G2-like	AT3G13040	-0.233988	-0.175149	-0.00830573	-0.030352	AT3G13040	myb-like HTH transcriptional regulator family protein [Source:TAIR;Acc:AT3G13040]
G2-like	AT3G25790	-0.108956	-0.0620626	-0.00240662	-0.0965112	AT3G25790	myb-like transcription factor family protein [Source:TAIR;Acc:AT3G25790]
G2-like	AT2G01060	0.0727884	0.0342007	0.304343	0.259214	AT2G01060	myb-like HTH transcriptional regulator family protein [Source:TAIR;Acc:AT2G01060]
G2-like	AT4G17695	0.163061	0.306379	-0.338666	-0.495009	KAN3	Homeodomain-like superfamily protein [Source:TAIR;Acc:AT4G17695]
G2-like	AT5G05090	0.250989	0.260322	0.530412	0.675417	AT5G05090	Homeodomain-like superfamily protein [Source:TAIR;Acc:AT5G05090]
G2-like	AT3G12730	0.149289	0.493196	0.0235098	-0.24867	AT3G12730	Homeodomain-like superfamily protein [Source:TAIR;Acc:AT3G12730]
G2-like	AT4G13640	0.0532561	-0.0253169	0.594877	0.621156	UNE16	Homeodomain-like superfamily protein [Source:TAIR;Acc:AT4G13640]
G2-like	AT5G45580	0.14057	0.135967	-0.207129	-0.531723	AT5G45580	Homeodomain-like superfamily protein [Source:TAIR;Acc:AT5G45580]
G2-like	AT2G02060	0.36391	0.252155	1.11019	1.07318	AT2G02060	Homeodomain-like superfamily protein [Source:TAIR;Acc:AT2G02060]
G2-like	AT1G79430	-0.117569	0.056154	-0.00992714	0.0100644	APL	Homeodomain-like superfamily protein [Source:TAIR;Acc:AT1G79430]
G2-like	AT5G06800	-0.269287	0.14568	0.25472	0.263372	AT5G06800	myb-like HTH transcriptional regulator family protein [Source:TAIR;Acc:AT5G06800]
G2-like	AT1G69580	0.103165	0.266487	-0.21217	-0.140024	AT1G69580	Homeodomain-like superfamily protein [Source:TAIR;Acc:AT1G69580]
G2-like	AT1G13300	0.10982	0.361754		0.204987	HRS1	myb-like transcription factor family protein [Source:TAIR;Acc:AT1G13300]
G2-like	AT5G42630	-0.501776	-0.186636	0.593604	0.402578	KAN4	Homeodomain-like superfamily protein [Source:TAIR;Acc:AT5G42630]
G2-like	AT3G24120	-0.340177	-0.470021	0.410679	0.416348	AT3G24120	Homeodomain-like superfamily protein [Source:TAIR;Acc:AT3G24120]
G2-like	AT1G14600	0.998695	0.632887	0.517426	0.694315	AT1G14600	Homeodomain-like superfamily protein [Source:TAIR;Acc:AT1G14600]
G2-like	AT5G62110				0.204987	AT5G62110	Homeodomain-like superfamily protein [Source:TAIR;Acc:AT5G62110]
G2-like	AT1G68670	-0.530877	-0.727946	1.19838	1.22536	AT1G68670	myb-like transcription factor family protein [Source:TAIR;Acc:AT1G68670]
G2-like	AT4G04580	-5.16556e-05	0.0745268	-0.0965111	0.00738977	AT4G04580	Homeodomain-like superfamily protein [Source:TAIR;Acc:AT4G04580]
G2-like	AT5G59570	-1.3396	-0.539183	0.164579	-0.424552	PCLL	Homeodomain-like superfamily protein [Source:TAIR;Acc:AT5G59570]
G2-like	AT2G20400	-0.259436	-0.0991519	0.244446	0.130028	AT2G20400	myb-like HTH transcriptional regulator family protein [Source:TAIR;Acc:AT2G20400]
G2-like	AT2G06020					AT2G06020	Homeodomain-like superfamily protein [Source:TAIR;Acc:AT2G06020]
G2-like	AT5G44190	1.09849	0.928898	0.773132	0.749767	GLK2	GOLDEN2-like 2 [Source:TAIR;Acc:AT5G44190]
G2-like	AT5G18240	-0.844051	-0.637526	-0.0355978	-0.120125	MYR1	myb-related protein 1 [Source:TAIR;Acc:AT5G18240]
G2-like	AT1G25550	-0.274228	-0.361667	1.63809	1.7875	AT1G25550	myb-like transcription factor family protein [Source:TAIR;Acc:AT1G25550]
G2-like	AT3G04450					AT3G04450	Homeodomain-like superfamily protein [Source:TAIR;Acc:AT3G04450]
G2-like	AT2G38300	-0.110533	0.029581	-0.304112	-0.408755	AT2G38300	myb-like HTH transcriptional regulator family protein [Source:TAIR;Acc:AT2G38300]
G2-like	AT3G46640	-0.212171	-0.0566668	0.842195	1.01504	PCL1	Homeodomain-like superfamily protein [Source:TAIR;Acc:AT3G46640]
G2-like	AT2G40260	0.147522	-0.0571662	-0.418262	-0.117075	AT2G40260	Homeodomain-like superfamily protein [Source:TAIR;Acc:AT2G40260]
G2-like	AT2G20570	1.081	0.780924	0.170493	-0.43196	GPRI1	GBF's pro-rich region-interacting factor 1 [Source:TAIR;Acc:AT2G20570]
G2-like	AT4G37180	-0.298212	-0.358373	1.19717	0.727728	AT4G37180	Homeodomain-like superfamily protein [Source:TAIR;Acc:AT4G37180]
G2-like	AT3G04030	-0.736391	-0.625522	-0.880262	-1.03579	AT3G04030	Homeodomain-like superfamily protein [Source:TAIR;Acc:AT3G04030]
G2-like	AT5G29000	0.221471	0.22503	0.509808	0.478241	PHL1	Homeodomain-like superfamily protein [Source:TAIR;Acc:AT5G29000]
G2-like	AT1G49560	-0.0249731	0.257125	-0.218395	-0.0991077	AT1G49560	Homeodomain-like superfamily protein [Source:TAIR;Acc:AT1G49560]
RAV	AT1G25560	-0.323302	-0.741497	1.6446	2.18628	TEM1	AP2/B3 transcription factor family protein [Source:TAIR;Acc:AT1G25560]
RAV	AT1G68840	0.745154	-0.438229	2.64156	3.40779	RAV2	related to ABI3/VP1 2 [Source:TAIR;Acc:AT1G68840]
RAV	AT1G50680	0.654778	0.34128	0.330356	0.366034	AT1G50680	AP2/B3 transcription factor family protein [Source:TAIR;Acc:AT1G50680]
RAV	AT3G25730	0.862114	0.31736	0.153249	0.233905	EDF3	ethylene response DNA binding factor 3 [Source:TAIR;Acc:AT3G25730]
RAV	AT1G13260	-1.27283	-1.2381	0.436709	0.721817	RAV1	related to ABI3/VP1 1 [Source:TAIR;Acc:AT1G13260]
RAV	AT1G51120	0.329067	-0.000232885	0.270075	0.0868278	AT1G51120	AP2/B3 transcription factor family protein [Source:TAIR;Acc:AT1G51120]
LSD	AT4G20380	-0.667696	-0.473202	0.0853717	0.162998	LSD1	LSD1 zinc finger family protein [Source:TAIR;Acc:AT4G20380]
LSD	AT1G32540	-0.332962	-0.175469	0.285504	0.397572	LOL1	lsd one like 1 [Source:TAIR;Acc:AT1G32540]
LSD	AT4G21610	0.346681	0.17623	0.76648	0.584133	LOL2	lsd one like 2 [Source:TAIR;Acc:AT4G21610]
VOZ	AT1G28520	-0.386187	-0.255472	0.0709351	0.0770004	VOZ1	vascular plant one zinc finger protein [Source:TAIR;Acc:AT1G28520]
VOZ	AT2G42400	-0.230844	-0.249013	0.656113	0.574384	VOZ2	vascular plant one zinc finger protein 2 [Source:TAIR;Acc:AT2G42400]
ERF	AT1G53170	-0.22458	-0.332246	-0.178821	-0.441478	ATERF-8	ethylene response factor 8 [Source:TAIR;Acc:AT1G53170]
ERF	AT1G53910	0.419707	0.195345	0.247762	0.32867	RAP2.12	related to AP2 12 [Source:TAIR;Acc:AT1G53910]
ERF	AT3G20310	-0.843385	-0.537585	0.0899213	-0.0458998	ATERF-7	ethylene response factor 7 [Source:TAIR;Acc:AT3G20310]
ERF	AT4G36900	-0.253662	0.147504	0.187462	0.357385	RAP2.10	related to AP2 10 [Source:TAIR;Acc:AT4G36900]
ERF	AT5G51990	-5.52528	-3.75353	-0.0572907	-0.956317	CBF4	C-repeat-binding factor 4 [Source:TAIR;Acc:AT5G51990]
ERF	AT5G50080	-1.80993	-0.825421	-1.13998	-0.617138	ERF110	ethylene response factor 110 [Source:TAIR;Acc:AT5G50080]
ERF	AT1G80580	0.165079	0.06156	0.0878283		ERF084	Integrase-type DNA-binding superfamily protein [Source:TAIR;Acc:AT1G80580]
ERF	AT1G49120	-0.60662	-0.783557	-0.191931	-1.13908	ERF117	Integrase-type DNA-binding superfamily protein [Source:TAIR;Acc:AT1G49120]
ERF	AT1G78080	-0.184524	0.0303156	0.189353	0.111686	RAP2.4	related to AP2 4 [Source:TAIR;Acc:AT1G78080]
ERF	AT1G77640	-0.697147	-0.303854	-0.11886	0.699146	ERF013	Integrase-type DNA-binding superfamily protein [Source:TAIR;Acc:AT1G77640]
ERF	AT4G32800	-0.705531	-0.66061	-0.723031	-1.1052	ERF043	Integrase-type DNA-binding superfamily protein [Source:TAIR;Acc:AT4G32800]
ERF	AT1G64380	0.246549	0.206847	-0.335433	-0.423077	ERF061	Integrase-type DNA-binding superfamily protein [Source:TAIR;Acc:AT1G64380]
ERF	AT4G39780	0.344044	0.0520846	0.309169	0.743503	ERF060	Integrase-type DNA-binding superfamily protein [Source:TAIR;Acc:AT4G39780]
ERF	AT2G38340	-1.24895	-0.670915	-0.0667968	0.0602618	DREB19	Integrase-type DNA-binding superfamily protein [Source:TAIR;Acc:AT2G38340]
ERF	AT1G68550	0.25849	0.0166766	0.249567	0.324339	ERF118	Integrase-type DNA-binding superfamily protein [Source:TAIR;Acc:AT1G68550]
ERF	AT1G36060	-0.464293	1.41739	1.37228	1.15816	ERF055	Integrase-type DNA-binding superfamily protein [Source:TAIR;Acc:AT1G36060]
ERF	AT5G65130	-0.153029	-0.5468	-0.103352	-0.139506	ERF057	Integrase-type DNA-binding superfamily protein [Source:TAIR;Acc:AT5G65130]
ERF	AT5G25190	0.69318	0.37775	-0.00529967	0.296359	ERF003	Integrase-type DNA-binding superfamily protein [Source:TAIR;Acc:AT5G25190]
ERF	AT1G75490	-0.70373	-0.943799	1.72807	2.02306	DREB2D	Integrase-type DNA-binding superfamily protein [Source:TAIR;Acc:AT1G75490]
ERF	AT5G21960	-1.72449	-0.348487	0.791488	0.798992	ERF016	Integrase-type DNA-binding superfamily protein [Source:TAIR;Acc:AT5G21960]
ERF	AT5G52020	-2.41728	-0.686107	-1.57535	-2.68625	ERF025	Integrase-type DNA-binding superfamily protein [Source:TAIR;Acc:AT5G52020]
ERF	AT4G13620	-0.766005	-0.114868	-0.0458859	0.187964	ERF062	Integrase-type DNA-binding superfamily protein [Source:TAIR;Acc:AT4G13620]
ERF	AT2G20880	-0.221377	0.748009	-0.448149	-0.126081	ERF053	Integrase-type DNA-binding superfamily protein [Source:TAIR;Acc:AT2G20880]
ERF	AT1G01250	-0.50561	0.230814	-2.95595	-2.72181	ERF023	Integrase-type DNA-binding superfamily protein [Source:TAIR;Acc:AT1G01250]
ERF	AT3G25890	0.220711	-0.051317	0.367146	0.630852	ERF119	Integrase-type DNA-binding superfamily protein [Source:TAIR;Acc:AT3G25890]
ERF	AT3G16280	-0.0968435	0.162981	-0.92043	-0.870787	ERF036	Integrase-type DNA-binding superfamily protein [Source:TAIR;Acc:AT3G16280]
ERF	AT4G11140	0.225419	0.143768	-0.479756	-0.464137	CRF1	cytokinin response factor 1 [Source:TAIR;Acc:AT4G11140]
ERF	AT1G28370	-1.41201	-0.622395	-0.502702	-0.198336	ERF11	ERF domain protein 11 [Source:TAIR;Acc:AT1G28370]
ERF	AT2G35700	1.16741	0.641996	-0.503011	-0.163853	ATERF38	ERF family protein 38 [Source:TAIR;Acc:AT2G35700]
ERF	AT4G25490	-5.97391	-3.40443	0.466595	0.114621	CBF1	C-repeat/DRE binding factor 1 [Source:TAIR;Acc:AT4G25490]
ERF	AT1G71520	0.177139	0.0432632	-0.113652	0.0188406	ERF020	Integrase-type DNA-binding superfamily protein [Source:TAIR;Acc:AT1G71520]
ERF	AT1G33760	-1.92483	-0.566648	0.972137	1.08195	ERF022	Integrase-type DNA-binding superfamily protein [Source:TAIR;Acc:AT1G33760]
ERF	AT3G15210	-0.868596	-0.580255	0.0731092	-0.101121	ATERF-4	ethylene responsive element binding factor 4 [Source:TAIR;Acc:AT3G15210]
ERF	AT5G53290	-1.07309	-0.930278	-0.174133	-0.254382	CRF3	cytokinin response factor 3 [Source:TAIR;Acc:AT5G53290]
ERF	AT2G46310	0.887057	0.580539	0.314484	0.425574	CRF5	cytokinin response factor 5 [Source:TAIR;Acc:AT2G46310]
ERF	AT1G19210	-1.96038	-0.66643	0.42496	0.127581	ERF017	Integrase-type DNA-binding superfamily protein [Source:TAIR;Acc:AT1G19210]
ERF	AT4G13040	-0.353975	-0.335923	-0.237166	-0.0337015	AT4G13040	Integrase-type DNA-binding superfamily protein [Source:TAIR;Acc:AT4G13040]
ERF	AT4G16750	1.09594	0.81862	-0.613676	-0.504489	ERF039	Integrase-type DNA-binding superfamily protein [Source:TAIR;Acc:AT4G16750]
ERF	AT5G18450	-5.16556e-05	-0.0625276	-0.00238907	0.00683947	DREB2G	Integrase-type DNA-binding superfamily protein [Source:TAIR;Acc:AT5G18450]
ERF	AT5G13330	-0.536883	-0.780496	1.19361	1.05375	Rap2.6L	related to AP2 6l [Source:TAIR;Acc:AT5G13330]
ERF	AT1G22985	-0.00336822	0.0158032	0.500319	0.456642	ERF069	Integrase-type DNA-binding superfamily protein [Source:TAIR;Acc:AT1G22985]
ERF	AT5G61590	0.636846	-0.0821244	2.10052	2.67822	ERF107	Integrase-type DNA-binding superfamily protein [Source:TAIR;Acc:AT5G61590]
ERF	AT3G16770	-0.138124	-0.0977436	0.330038	0.426048	RAP2.3	ethylene-responsive element binding protein [Source:TAIR;Acc:AT3G16770]
ERF	AT1G22810	-2.04403	-0.847967	-1.74212	-1.40859	ERF019	Integrase-type DNA-binding superfamily protein [Source:TAIR;Acc:AT1G22810]
ERF	AT5G67000					ERF122	Integrase-type DNA-binding superfamily protein [Source:TAIR;Acc:AT5G67000]
ERF	AT2G31230	0.884139	0.114354	-0.148216	0.0209059	ATERF15	ethylene-responsive element binding factor 15 [Source:TAIR;Acc:AT2G31230]
ERF	AT1G77200	-0.431442	0.157059	-0.519841	-0.769715	ERF037	Integrase-type DNA-binding superfamily protein [Source:TAIR;Acc:AT1G77200]
ERF	AT5G67010	-0.100433	0.061549	0.257989	0.331076	ERF121	Integrase-type DNA-binding superfamily protein [Source:TAIR;Acc:AT5G67010]
ERF	AT5G64750	-0.946357	-0.347418	-0.92307	-0.442161	ABR1	Integrase-type DNA-binding superfamily protein [Source:TAIR;Acc:AT5G64750]
ERF	AT1G12890	0.213626	0.0638201	-0.171618	-0.0207301	ERF088	Integrase-type DNA-binding superfamily protein [Source:TAIR;Acc:AT1G12890]
ERF	AT3G14230	0.486813	0.276184	0.295964	0.483487	RAP2.2	related to AP2 2 [Source:TAIR;Acc:AT3G14230]
ERF	AT5G47220	-0.909153	-0.965538	0.73606	0.682808	ATERF2	ethylene responsive element binding factor 2 [Source:TAIR;Acc:AT5G47220]
ERF	AT1G22190	-1.41611	-0.806328	0.198448	0.351353	RAP2-13	Integrase-type DNA-binding superfamily protein [Source:TAIR;Acc:AT1G22190]
ERF	AT3G61630	-0.634	-0.530229	0.591916	0.474509	CRF6	cytokinin response factor 6 [Source:TAIR;Acc:AT3G61630]
ERF	AT5G05410	-3.04954	-1.58189	1.73945	1.37184	DREB2A	DRE-binding protein 2A [Source:TAIR;Acc:AT5G05410]
ERF	AT3G23240	0.216899	-0.287552	0.303213	0.505338	ERF1	ethylene response factor 1 [Source:TAIR;Acc:AT3G23240]
ERF	AT4G34410	-3.86339	-1.58866	0.883472	0.399953	RRTF1	redox responsive transcription factor 1 [Source:TAIR;Acc:AT4G34410]
ERF	AT1G25470	-0.593735	-0.308099	0.0950588	-0.0438941	ERF116	AP2 domain-containing transcription factor family protein [Source:TAIR;Acc:AT1G25470]
ERF	AT1G15360	-1.37213	-0.927035	-0.85187	-0.625865	SHN1	Integrase-type DNA-binding superfamily protein [Source:TAIR;Acc:AT1G15360]
ERF	AT5G18560	0.110199		0.0878283	0.204987	PUCHI	Integrase-type DNA-binding superfamily protein [Source:TAIR;Acc:AT5G18560]
ERF	AT4G06746	0.205989	-0.119298	0.299235	0.164597	RAP2.9	related to AP2 9 [Source:TAIR;Acc:AT4G06746]
ERF	AT5G61890	0.965596	0.330999	0.382909	0.4596	ERF114	Integrase-type DNA-binding superfamily protein [Source:TAIR;Acc:AT5G61890]
ERF	AT4G17490	-1.63542	-0.93939	1.09378	0.922113	ATERF6	ethylene responsive element binding factor 6 [Source:TAIR;Acc:AT4G17490]
ERF	AT2G44840	-0.52035	0.533304	0.534708	0.674181	ATERF13	ethylene-responsive element binding factor 13 [Source:TAIR;Acc:AT2G44840]
ERF	AT1G06160	1.62217	-0.197121	0.906454	2.01104	ORA59	octadecanoid-responsive Arabidopsis AP2/ERF 59 [Source:TAIR;Acc:AT1G06160]
ERF	AT1G28360	0.115122	-0.209374	0.983452	0.483689	ERF12	ERF domain protein 12 [Source:TAIR;Acc:AT1G28360]
ERF	AT2G20350					ERF120	Integrase-type DNA-binding superfamily protein [Source:TAIR;Acc:AT2G20350]
ERF	AT1G71130	-0.245454	-0.167849	0.220719	0.144757	ERF070	Integrase-type DNA-binding superfamily protein [Source:TAIR;Acc:AT1G71130]
ERF	AT3G50260	0.038406	0.341827	0.387804	0.617731	CEJ1	cooperatively regulated by ethylene and jasmonate 1 [Source:TAIR;Acc:AT3G50260]
ERF	AT5G61600	-0.641521	-0.00853753	1.97563	1.91266	ERF104	ethylene response factor 104 [Source:TAIR;Acc:AT5G61600]
ERF	AT5G47230	-1.81722	-1.05319	0.341735	0.383701	ERF5	ethylene responsive element binding factor 5 [Source:TAIR;Acc:AT5G47230]
ERF	AT4G31060	0.270632	0.0308703	0.736461	0.573828	ERF015	Integrase-type DNA-binding superfamily protein [Source:TAIR;Acc:AT4G31060]
ERF	AT4G17500	0.606398	0.371066	1.50977	1.63424	ATERF-1	ethylene responsive element binding factor 1 [Source:TAIR;Acc:AT4G17500]
ERF	AT3G54320	-0.460956	-0.372094	-0.119478	-0.0859934	WRI1	Integrase-type DNA-binding superfamily protein [Source:TAIR;Acc:AT3G54320]
ERF	AT2G33710	0.00189518	-0.0795728	0.184987	0.451367	ERF112	Integrase-type DNA-binding superfamily protein [Source:TAIR;Acc:AT2G33710]
ERF	AT5G11590	0.0360612	-0.00886539	-0.700271	-1.03987	TINY2	Integrase-type DNA-binding superfamily protein [Source:TAIR;Acc:AT5G11590]
ERF	AT4G25480	-5.57556	-3.32577	-0.118311	-0.609047	DREB1A	dehydration response element B1A [Source:TAIR;Acc:AT4G25480]
ERF	AT2G25820	0.308608	0.133062	-0.22932	-0.353309	ERF042	Integrase-type DNA-binding superfamily protein [Source:TAIR;Acc:AT2G25820]
ERF	AT5G51190	-1.00008	-0.178976	0.635902	0.777566	ERF105	Integrase-type DNA-binding superfamily protein [Source:TAIR;Acc:AT5G51190]
ERF	AT2G40220			0.335115		ABI4	Integrase-type DNA-binding superfamily protein [Source:TAIR;Acc:AT2G40220]
ERF	AT3G11020	-1.53564	-1.13448	1.60474	1.02011	DREB2B	DRE/CRT-binding protein 2B [Source:TAIR;Acc:AT3G11020]
ERF	AT5G13910	-0.0915827	-0.276795	-0.490688	-0.609858	LEP	Integrase-type DNA-binding superfamily protein [Source:TAIR;Acc:AT5G13910]
ERF	AT5G25810	0.31455	0.128513	0.0661961	0.318694	tny	Integrase-type DNA-binding superfamily protein [Source:TAIR;Acc:AT5G25810]
ERF	AT1G12610	-4.36373	-2.10953	-0.252578	-0.790914	DDF1	Integrase-type DNA-binding superfamily protein [Source:TAIR;Acc:AT1G12610]
ERF	AT1G12630	-0.522915	-0.00490695	-0.358682	-0.109047	ERF027	Integrase-type DNA-binding superfamily protein [Source:TAIR;Acc:AT1G12630]
ERF	AT2G44940	0.191019	0.118583	-1.13669	-1.23104	ERF034	Integrase-type DNA-binding superfamily protein [Source:TAIR;Acc:AT2G44940]
ERF	AT5G25390	0.686701	0.688576	-0.815495	-0.607842	SHN2	Integrase-type DNA-binding superfamily protein [Source:TAIR;Acc:AT5G25390]
ERF	AT4G27950	-0.267056	-0.216512	1.04325	1.10774	CRF4	cytokinin response factor 4 [Source:TAIR;Acc:AT4G27950]
ERF	AT4G28140	-0.264985	0.273274	0.0445549	-0.0982648	ERF054	Integrase-type DNA-binding superfamily protein [Source:TAIR;Acc:AT4G28140]
ERF	AT2G22200	0.333856	0.358083	0.864452	0.938559	ERF056	Integrase-type DNA-binding superfamily protein [Source:TAIR;Acc:AT2G22200]
ERF	AT5G11190	-0.0309606	-0.274496	-0.0294892	-0.261546	SHN3	Integrase-type DNA-binding superfamily protein [Source:TAIR;Acc:AT5G11190]
ERF	AT4G25470	-5.28459	-2.83537	0.316152	0.0124077	CBF2	C-repeat/DRE binding factor 2 [Source:TAIR;Acc:AT4G25470]
ERF	AT4G18450			0.136079		ERF091	Integrase-type DNA-binding superfamily protein [Source:TAIR;Acc:AT4G18450]
ERF	AT3G57600	0.0687154	0.0529835	-0.131614	-0.351022	DREB2F	Integrase-type DNA-binding superfamily protein [Source:TAIR;Acc:AT3G57600]
ERF	AT1G74930	-2.01852	-0.577822	0.379482	0.250329	ORA47	Integrase-type DNA-binding superfamily protein [Source:TAIR;Acc:AT1G74930]
ERF	AT5G07580	1.629	0.952428	0.640079	1.5283	ERF106	Integrase-type DNA-binding superfamily protein [Source:TAIR;Acc:AT5G07580]
ERF	AT2G23340	-0.119947	0.218024	-0.374145	-0.480268	DEAR3	DREB and EAR motif protein 3 [Source:TAIR;Acc:AT2G23340]
ERF	AT4G23750	0.0752647	0.0421315	0.184118	0.0859038	CRF2	cytokinin response factor 2 [Source:TAIR;Acc:AT4G23750]
ERF	AT5G43410	-0.758857	-0.575792	-0.691799	-0.656557	ERF096	Integrase-type DNA-binding superfamily protein [Source:TAIR;Acc:AT5G43410]
ERF	AT1G46768	-1.169	-0.817365	-0.489598	-0.174754	RAP2.1	related to AP2 1 [Source:TAIR;Acc:AT1G46768]
ERF	AT3G23230	0.459717	0.0809241	-0.0105497	-0.0681162	ERF098	Integrase-type DNA-binding superfamily protein [Source:TAIR;Acc:AT3G23230]
ERF	AT1G24590	0.648866	-0.144383	-0.118624	-0.051809	DRNL	DORNROSCHEN-like [Source:TAIR;Acc:AT1G24590]
ERF	AT1G71450	-0.297224	-0.213138	-0.389798	-0.131637	ERF021	Integrase-type DNA-binding superfamily protein [Source:TAIR;Acc:AT1G71450]
ERF	AT1G44830	0.644327	0.354213	-0.35568	1.2322	ERF014	Integrase-type DNA-binding superfamily protein [Source:TAIR;Acc:AT1G44830]
ERF	AT1G04370	0.10982				ATERF14	Ethylene-responsive element binding factor 14 [Source:TAIR;Acc:AT1G04370]
ERF	AT1G50640	-0.403526	-0.171832	0.176309	0.128884	ERF3	ethylene responsive element binding factor 3 [Source:TAIR;Acc:AT1G50640]
ERF	AT1G12980	1.15731	0.160667	0.453875	0.234486	ESR1	Integrase-type DNA-binding superfamily protein [Source:TAIR;Acc:AT1G12980]
ERF	AT1G21910	0.407133	-0.186333	0.978072	0.616945	DREB26	Integrase-type DNA-binding superfamily protein [Source:TAIR;Acc:AT1G21910]
ERF	AT5G67190	-0.180874	-0.352739	0.448403	0.64165	DEAR2	DREB and EAR motif protein 2 [Source:TAIR;Acc:AT5G67190]
ERF	AT1G43160	0.94339	0.490473	2.09384	2.31897	RAP2.6	related to AP2 6 [Source:TAIR;Acc:AT1G43160]
ERF	AT5G44210	0.25973	0.510739	0.237954	0.262227	ERF9	erf domain protein 9 [Source:TAIR;Acc:AT5G44210]
ERF	AT2G40340	-0.0622309	-0.041173	1.2586	1.30847	DREB2C	Integrase-type DNA-binding superfamily protein [Source:TAIR;Acc:AT2G40340]
ERF	AT5G19790	-0.66606	-0.277493	0.459285	0.192193	RAP2.11	related to AP2 11 [Source:TAIR;Acc:AT5G19790]
ERF	AT1G03800	-0.517398	-0.374395	0.525233	0.376135	ERF10	ERF domain protein 10 [Source:TAIR;Acc:AT1G03800]
ERF	AT1G63030	-3.75968	-1.85307	-0.633503	-1.29195	ddf2	Integrase-type DNA-binding superfamily protein [Source:TAIR;Acc:AT1G63030]
ERF	AT2G40350	-0.650736	-0.198066	-0.111094	-0.0897267	DREB2H	Integrase-type DNA-binding superfamily protein [Source:TAIR;Acc:AT2G40350]
ERF	AT3G60490	0.202273	0.61695	0.36193	0.215168	ERF035	Integrase-type DNA-binding superfamily protein [Source:TAIR;Acc:AT3G60490]
ERF	AT3G23220					ERF095	Integrase-type DNA-binding superfamily protein [Source:TAIR;Acc:AT3G23220]
ERF	AT2G47520	0.667573	-0.0568749	0.125084	0.0170219	HRE2	Integrase-type DNA-binding superfamily protein [Source:TAIR;Acc:AT2G47520]
ERF	AT5G07310		0.06156	0.396362	0.105418	AT5G07310	Integrase-type DNA-binding superfamily protein [Source:TAIR;Acc:AT5G07310]
ERF	AT1G72360	0.226298	-0.221646	0.361794	0.591152	HRE1	Integrase-type DNA-binding superfamily protein [Source:TAIR;Acc:AT1G72360]
ERF	AT1G28160					ERF087	Integrase-type DNA-binding superfamily protein [Source:TAIR;Acc:AT1G28160]
ERF	AT2G36450	-0.109566	0.0745268	-0.00876103	0.00738977	HRD	Integrase-type DNA-binding superfamily protein [Source:TAIR;Acc:AT2G36450]
GeBP	AT1G11510	-0.394318	-0.295036	-0.601729	-0.222737	AT1G11510	DNA-binding storekeeper protein-related transcriptional regulator [Source:TAIR;Acc:AT1G11510]
GeBP	AT4G00232	-1.33078	-0.26908	-0.193676	-0.281728	AT4G00232	DNA-binding storekeeper protein-related transcriptional regulator [Source:TAIR;Acc:AT4G00232]
GeBP	AT1G61730	0.171374	0.094109	-0.0435494	0.0472885	AT1G61730	DNA-binding storekeeper protein-related transcriptional regulator [Source:TAIR;Acc:AT1G61730]
GeBP	AT4G00390	-0.0812673	0.00430009	-0.181821	-0.709945	AT4G00390	DNA-binding storekeeper protein-related transcriptional regulator [Source:TAIR;Acc:AT4G00390]
GeBP	AT2G36340	0.125558	0.0177316	0.54882	0.751725	AT2G36340	DNA-binding storekeeper protein-related transcriptional regulator [Source:TAIR;Acc:AT2G36340]
GeBP	AT4G00238	0.361067	0.136408	0.562553	0.478507	AT4G00238	DNA-binding storekeeper protein-related transcriptional regulator [Source:TAIR;Acc:AT4G00238]
GeBP	AT2G01370	-0.295564	-0.258333	-0.247224	-0.342279	AT2G01370	DNA-binding storekeeper protein-related transcriptional regulator [Source:TAIR;Acc:AT2G01370]
GeBP	AT1G66420					AT1G66420	DNA-binding storekeeper protein-related transcriptional regulator [Source:TAIR;Acc:AT1G66420]
GeBP	AT5G14280	0.558645	0.448147	0.0687487	-0.00150364	AT5G14280	DNA-binding storekeeper protein-related [Source:TAIR;Acc:AT5G14280]
GeBP	AT4G00130	-1.20265	-0.775242	-1.10531	-1.09353	AT4G00130	DNA-binding storekeeper protein-related transcriptional regulator [Source:TAIR;Acc:AT4G00130]
GeBP	AT4G25210	-0.074233	-0.158729	-0.082806	-0.111807	AT4G25210	DNA-binding storekeeper protein-related transcriptional regulator [Source:TAIR;Acc:AT4G25210]
GeBP	AT4G01260	0.110199	0.165971		0.279341	AT4G01260	DNA-binding storekeeper protein-related transcriptional regulator [Source:TAIR;Acc:AT4G01260]
GeBP	AT2G25650	0.174372	0.121101	0.138185	-0.0786007	AT2G25650	DNA-binding storekeeper protein-related transcriptional regulator [Source:TAIR;Acc:AT2G25650]
GeBP	AT5G41765	-0.424593	-0.114483	-0.0936566	-0.386556	AT5G41765	DNA-binding storekeeper protein-related transcriptional regulator [Source:TAIR;Acc:AT5G41765]
GeBP	AT5G28040	-0.0912042	-0.0615875	-0.0229332	-0.0168698	AT5G28040	DNA-binding storekeeper protein-related transcriptional regulator [Source:TAIR;Acc:AT5G28040]
GeBP	AT1G44810	0.227353	0.103421	0.285011	0.375724	AT1G44810	DNA-binding storekeeper protein-related transcriptional regulator [Source:TAIR;Acc:AT1G44810]
GeBP	AT2G20613					AT2G20613	DNA-binding storekeeper protein-related transcriptional regulator [Source:TAIR;Acc:AT2G20613]
GeBP	AT4G00270	0.0142423	0.089323	0.192173	0.124178	AT4G00270	DNA-binding storekeeper protein-related transcriptional regulator [Source:TAIR;Acc:AT4G00270]
GeBP	AT3G04930	-0.232601	-0.216782	0.37337	0.367396	AT3G04930	DNA-binding storekeeper protein-related transcriptional regulator [Source:TAIR;Acc:AT3G04930]
GeBP	AT4G00610	0.0328488	-0.343432	-0.287868	-0.781822	AT4G00610	DNA-binding storekeeper protein-related transcriptional regulator [Source:TAIR;Acc:AT4G00610]
GeBP	AT4G00250	-0.122031	-0.0840813	0.436839	-0.522339	AT4G00250	DNA-binding storekeeper protein-related transcriptional regulator [Source:TAIR;Acc:AT4G00250]
GeBP	AT1G55950	-0.400578	-0.233393	-0.0167171	0.0243744	AT1G55950	DNA-binding storekeeper protein-related transcriptional regulator [Source:TAIR;Acc:AT1G55950]
CPP	AT5G25790	0.315295	-0.0737967	-0.143709	-0.328075	TCX7	Tesmin/TSO1-like CXC domain-containing protein [Source:TAIR;Acc:AT5G25790]
CPP	AT3G16160	0.494321	0.357279	0.345442	-0.145842	TCX8	Tesmin/TSO1-like CXC domain-containing protein [Source:TAIR;Acc:AT3G16160]
CPP	AT3G22760	-0.766561	-0.550123	0.11816	0.145521	SOL1	Tesmin/TSO1-like CXC domain-containing protein [Source:TAIR;Acc:AT3G22760]
CPP	AT3G22780	0.103867	0.0533381	-0.11772	-0.141877	TSO1	Tesmin/TSO1-like CXC domain-containing protein [Source:TAIR;Acc:AT3G22780]
CPP	AT3G04850	0.250449	0.0569686	-0.132233	-0.150681	TCX4	Tesmin/TSO1-like CXC domain-containing protein [Source:TAIR;Acc:AT3G04850]
CPP	AT2G20110	0.34371	0.295405	0.0654182	-0.295148	TCX6	Tesmin/TSO1-like CXC domain-containing protein [Source:TAIR;Acc:AT2G20110]
CPP	AT4G29000	-0.00209079	-0.0591915	0.200219	0.226274	TCX5	Tesmin/TSO1-like CXC domain-containing protein [Source:TAIR;Acc:AT4G29000]
CPP	AT4G14770	0.0834329	-0.0902731	-0.243809	-0.325587	TCX2	TESMIN/TSO1-like CXC 2 [Source:TAIR;Acc:AT4G14770]
TALE	AT4G36870	0.0946966	0.207791	-0.044092	0.153066	BLH2	BEL1-like homeodomain 2 [Source:TAIR;Acc:AT4G36870]
TALE	AT2G23760	-0.951625	-0.586428	-0.263369	-0.0343814	BLH4	BEL1-like homeodomain 4 [Source:TAIR;Acc:AT2G23760]
TALE	AT1G23380	-0.368961	-0.173197	0.233605	0.0983991	KNAT6	KNOTTED1-like homeobox gene 6 [Source:TAIR;Acc:AT1G23380]
TALE	AT4G32980	-0.172894	-0.0791295	-0.231803	-0.400279	ATH1	homeobox gene 1 [Source:TAIR;Acc:AT4G32980]
TALE	AT5G25220	0.014658	0.0417443	0.0937984	0.120832	KNAT3	KNOTTED1-like homeobox gene 3 [Source:TAIR;Acc:AT5G25220]
TALE	AT2G27220	1.41177	0.880909	-0.0309748	0.343061	BLH5	BEL1-like homeodomain 5 [Source:TAIR;Acc:AT2G27220]
TALE	AT1G62990	-0.491977	0.00869133	-1.14633	-0.679403	KNAT7	KNOTTED-like homeobox of Arabidopsis thaliana 7 [Source:TAIR;Acc:AT1G62990]
TALE	AT5G02030	0.0445492	-0.00183951	-0.00951209	-0.0872238	LSN	POX (plant homeobox) family protein [Source:TAIR;Acc:AT5G02030]
TALE	AT4G08150	-0.636368	-0.161793	-0.522568	-0.712408	KNAT1	KNOTTED-like from Arabidopsis thaliana [Source:TAIR;Acc:AT4G08150]
TALE	AT2G35940	-0.682167	-0.28108	-0.268031	-0.417713	BLH1	BEL1-like homeodomain 1 [Source:TAIR;Acc:AT2G35940]
TALE	AT2G16400	0.182637	0.0123651	0.256738	0.343585	BLH7	BEL1-like homeodomain 7 [Source:TAIR;Acc:AT2G16400]
TALE	AT2G27990	0.488351	0.264299	-0.476316	-0.313657	BLH8	BEL1-like homeodomain 8 [Source:TAIR;Acc:AT2G27990]
TALE	AT4G34610	0.228398	0.0191005	-1.13251	-1.17185	BLH6	BEL1-like homeodomain 6 [Source:TAIR;Acc:AT4G34610]
TALE	AT5G11060	0.295449	0.200322	0.464151	0.392836	KNAT4	KNOTTED1-like homeobox gene 4 [Source:TAIR;Acc:AT5G11060]
TALE	AT5G41410	-0.396198	-0.224245	-0.0994865	0.000856044	BEL1	POX (plant homeobox) family protein [Source:TAIR;Acc:AT5G41410]
TALE	AT1G75410	-0.438004	-0.212015	-0.114048	-0.114124	BLH3	BEL1-like homeodomain 3 [Source:TAIR;Acc:AT1G75410]
TALE	AT1G62360	-0.593357	-0.377281	-0.327783	-0.461073	STM	KNOX/ELK homeobox transcription factor [Source:TAIR;Acc:AT1G62360]
TALE	AT1G75430	-0.103084	0.0279916	-0.0567484	-0.24276	BLH11	BEL1-like homeodomain 11 [Source:TAIR;Acc:AT1G75430]
TALE	AT1G19700	-0.245212	-0.202876	-0.305018	-0.28398	BEL10	BEL1-like homeodomain 10 [Source:TAIR;Acc:AT1G19700]
TALE	AT4G32040	0.111437	0.0723629	0.602523	0.593091	KNAT5	KNOTTED1-like homeobox gene 5 [Source:TAIR;Acc:AT4G32040]
TALE	AT1G70510	0.662029	0.684714	0.60303	0.511747	KNAT2	KNOTTED-like from Arabidopsis thaliana 2 [Source:TAIR;Acc:AT1G70510]
B3	AT1G26680	0.261171	-0.0364369	0.80004	0.341766	REM17	transcriptional factor B3 family protein [Source:TAIR;Acc:AT1G26680]
B3	AT4G01580	0.36185	0.148255	1.01227	1.09334	AT4G01580	AP2/B3-like transcriptional factor family protein [Source:TAIR;Acc:AT4G01580]
B3	AT4G31630	-0.168441	-0.168986	0.334618	0.432374	REM4	Transcriptional factor B3 family protein [Source:TAIR;Acc:AT4G31630]
B3	AT5G57720	1.7493	0.866166	0.833359	0.708812	AT5G57720	AP2/B3-like transcriptional factor family protein [Source:TAIR;Acc:AT5G57720]
B3	AT5G18090	0.219067	0.228498	-0.171581	-0.293017	AT5G18090	AP2/B3-like transcriptional factor family protein [Source:TAIR;Acc:AT5G18090]
B3	AT3G11580	-0.0871417	-0.141189	0.621645	0.440976	ARF32	AP2/B3-like transcriptional factor family protein [Source:TAIR;Acc:AT3G11580]
B3	AT1G43950					ARF23	auxin response factor 23 [Source:TAIR;Acc:AT1G43950]
B3	AT4G31680	1.36061	0.641871	-0.0321812	0.629457	REM8	Transcriptional factor B3 family protein [Source:TAIR;Acc:AT4G31680]
B3	AT1G08985	-0.681845	-0.412371	1.11623	-0.0478423	AT1G08985	AP2/B3-like transcriptional factor family protein [Source:TAIR;Acc:AT1G08985]
B3	AT5G25475	0.152488	0.0952404	0.994645	1.02124	AT5G25475	AP2/B3-like transcriptional factor family protein [Source:TAIR;Acc:AT5G25475]
B3	AT4G01500	-0.630153	-0.0502815	0.357645	0.195068	NGA4	AP2/B3-like transcriptional factor family protein [Source:TAIR;Acc:AT4G01500]
B3	AT1G49480	0.160351	0.0005807	0.314743	0.398033	RTV1	related to vernalization1 1 [Source:TAIR;Acc:AT1G49480]
B3	AT5G06250	1.05858	0.637788	-0.328814	-0.411272	AT5G06250	AP2/B3-like transcriptional factor family protein [Source:TAIR;Acc:AT5G06250]
B3	AT2G24700	0.753619	0.665677	0.650245	0.810557	REM10	Transcriptional factor B3 family protein [Source:TAIR;Acc:AT2G24700]
B3	AT4G31650	0.496616	0.459036	0.137643	0.134106	REM6	Transcriptional factor B3 family protein [Source:TAIR;Acc:AT4G31650]
B3	AT4G32010	0.0979142	0.0953849	0.176838	0.137032	HSL1	HSI2-like 1 [Source:TAIR;Acc:AT4G32010]
B3	AT5G60140	-0.015824	-0.12206	0.163444	0.0480267	AT5G60140	AP2/B3-like transcriptional factor family protein [Source:TAIR;Acc:AT5G60140]
B3	AT2G35310	0.617627	0.324062	0.297154	0.295226	AT2G35310	Transcriptional factor B3 family protein [Source:TAIR;Acc:AT2G35310]
B3	AT5G25470	-0.313886	-0.150703	0.379049	0.0222012	AT5G25470	AP2/B3-like transcriptional factor family protein [Source:TAIR;Acc:AT5G25470]
B3	AT4G34400	1.14676	0.394409	1.01209	1.0368	AT4G34400	AP2/B3-like transcriptional factor family protein [Source:TAIR;Acc:AT4G34400]
B3	AT4G31640	1.33827	0.0164952	0.0106793	0.274051	REM5	transcriptional factor B3 family protein [Source:TAIR;Acc:AT4G31640]
B3	AT4G31690	1.10849	0.74787	0.630945	0.673305	REM9	Transcriptional factor B3 family protein [Source:TAIR;Acc:AT4G31690]
B3	AT3G17010	1.51208	0.490591	1.17767	1.04154	AT3G17010	AP2/B3-like transcriptional factor family protein [Source:TAIR;Acc:AT3G17010]
B3	AT4G00260		0.06156	0.0925513	0.204648	MEE45	Transcriptional factor B3 family protein [Source:TAIR;Acc:AT4G00260]
B3	AT5G66980	-0.792674	-0.318347	-0.0044606	-0.649158	AT5G66980	AP2/B3-like transcriptional factor family protein [Source:TAIR;Acc:AT5G66980]
B3	AT3G46770	-0.0895271	-0.332489	0.252229	0.127496	REM22	AP2/B3-like transcriptional factor family protein [Source:TAIR;Acc:AT3G46770]
B3	AT4G31615	0.487852	0.164735	0.394097	0.374145	REM2	Transcriptional factor B3 family protein [Source:TAIR;Acc:AT4G31615]
B3	AT4G21550	0.036828	0.0256845	0.376553	0.303019	VAL3	VP1/ABI3-like 3 [Source:TAIR;Acc:AT4G21550]
B3	AT3G61970	0.560049	0.265783	0.346366	0.5877	NGA2	AP2/B3-like transcriptional factor family protein [Source:TAIR;Acc:AT3G61970]
B3	AT2G24681	-0.257902	0.0999683	0.0348106	-0.116456	REM11	AP2/B3-like transcriptional factor family protein [Source:TAIR;Acc:AT2G24681]
B3	AT3G06220	0.210825	0.0485529	0.271211	0.285042	AT3G06220	AP2/B3-like transcriptional factor family protein [Source:TAIR;Acc:AT3G06220]
B3	AT1G28300	0.00202184	0.114144	-0.162157	0.110049	LEC2	AP2/B3-like transcriptional factor family protein [Source:TAIR;Acc:AT1G28300]
B3	AT2G24650	0.0887836	0.0873253	0.251315	0.173826	REM13	DNA binding;DNA binding;sequence-specific DNA binding transcription factors [Source:TAIR;Acc:AT2G24650]
B3	AT2G36080	-0.445789	-0.438704	1.18397	1.10221	ARF31	AP2/B3-like transcriptional factor family protein [Source:TAIR;Acc:AT2G36080]
B3	AT2G24690	-0.00174397	-0.0704817	0.0543606	0.163472	AT2G24690	Transcriptional factor B3 family protein [Source:TAIR;Acc:AT2G24690]
B3	AT3G18960	0.145546	-0.139425	1.3588	1.27533	AT3G18960	AP2/B3-like transcriptional factor family protein [Source:TAIR;Acc:AT3G18960]
B3	AT4G31610	0.912391	0.460727	0.164319	0.166694	REM1	Transcriptional factor B3 family protein [Source:TAIR;Acc:AT4G31610]
B3	AT4G31660	0.00172499	-0.0011817	0.451896	0.664577	REM7	AP2/B3-like transcriptional factor family protein [Source:TAIR;Acc:AT4G31660]
B3	AT3G53310	0.767565	0.225576	0.487925	0.505072	REM20	AP2/B3-like transcriptional factor family protein [Source:TAIR;Acc:AT3G53310]
B3	AT2G16210	0.870633	0.216322	0.215731	0.0836855	AT2G16210	Transcriptional factor B3 family protein [Source:TAIR;Acc:AT2G16210]
B3	AT2G30470	0.219882	-0.00554006	0.604407	0.515318	HSI2	high-level expression of sugar-inducible gene 2 [Source:TAIR;Acc:AT2G30470]
B3	AT2G46870	-0.0815188	0.104988	-0.619896	-0.278212	NGA1	AP2/B3-like transcriptional factor family protein [Source:TAIR;Acc:AT2G46870]
B3	AT1G20600	0.00172499	0.0527259	0.184987	0.139074	AT1G20600	AP2/B3-like transcriptional factor family protein [Source:TAIR;Acc:AT1G20600]
B3	AT1G01030	0.408073	0.317986	0.0833855	0.26683	NGA3	AP2/B3-like transcriptional factor family protein [Source:TAIR;Acc:AT1G01030]
B3	AT5G32460	0.0070095	-0.160694	0.122903	0.311779	AT5G32460	Transcriptional factor B3 family protein [Source:TAIR;Acc:AT5G32460]
B3	AT2G24696	-0.526587	-0.328146	0.118032	0.125236	AT2G24696	transcriptional factor B3 family protein [Source:TAIR;Acc:AT2G24696]
B3	AT3G18990	0.129099	0.0402633	-0.0153837	0.054698	VRN1	AP2/B3-like transcriptional factor family protein [Source:TAIR;Acc:AT3G18990]
B3	AT4G33280	0.263002	0.0829545	0.658055	0.483438	REM16	AP2/B3-like transcriptional factor family protein [Source:TAIR;Acc:AT4G33280]
B3	AT2G24680	0.0168432	-0.197065	-0.231081	-0.369173	REM12	transcriptional factor B3 family protein [Source:TAIR;Acc:AT2G24680]
B3	AT4G31620	1.00823	0.7247	1.88879	1.85806	REM3	Transcriptional factor B3 family protein [Source:TAIR;Acc:AT4G31620]
B3	AT1G16640	1.63485	0.689763	0.403019	0.8738	AT1G16640	AP2/B3-like transcriptional factor family protein [Source:TAIR;Acc:AT1G16640]
B3	AT5G60142	0.209453	-0.249694	-0.209352	-0.326556	AT5G60142	AP2/B3-like transcriptional factor family protein [Source:TAIR;Acc:AT5G60142]
B3	AT2G33720	0.495166	-0.319191	-0.173855	-0.159274	AT2G33720	AP2/B3-like transcriptional factor family protein [Source:TAIR;Acc:AT2G33720]
B3	AT3G24650	0.000529203	-0.00265143	-0.146467	0.0148005	ABI3	AP2/B3-like transcriptional factor family protein [Source:TAIR;Acc:AT3G24650]
B3	AT4G03170	-0.204107	0.0171857	-0.208237	0.0701859	AT4G03170	AP2/B3-like transcriptional factor family protein [Source:TAIR;Acc:AT4G03170]
B3	AT1G49475	0.884866	0.392949	0.2503	0.272328	AT1G49475	AP2/B3-like transcriptional factor family protein [Source:TAIR;Acc:AT1G49475]
B3	AT1G05930	0.879416	0.380394	1.06533	0.629673	AT1G05930	Domain of unknown function (DUF313) [Source:TAIR;Acc:AT1G05930]
B3	AT3G19184	1.56188	0.391201	0.567212	0.398443	AT3G19184	AP2/B3-like transcriptional factor family protein [Source:TAIR;Acc:AT3G19184]
B3	AT5G09780	1.38363	0.403162	0.935867	0.708044	REM23	Transcriptional factor B3 family protein [Source:TAIR;Acc:AT5G09780]
B3	AT5G42700	0.16426	-0.0264304	-0.0385577	-0.166465	AT5G42700	AP2/B3-like transcriptional factor family protein [Source:TAIR;Acc:AT5G42700]
B3	AT5G60130	-0.66402	-0.188686	0.173543	-0.497769	AT5G60130	AP2/B3-like transcriptional factor family protein [Source:TAIR;Acc:AT5G60130]
B3	AT3G26790	-1.21081	-0.302398	-0.504153	-0.290733	FUS3	AP2/B3-like transcriptional factor family protein [Source:TAIR;Acc:AT3G26790]
B3	AT2G24645	0.0796917	-0.0491094	0.264732	0.41035	REM14	Transcriptional factor B3 family protein [Source:TAIR;Acc:AT2G24645]
B3	AT3G06160	0.382329	0.13787	0.614792	0.722713	REM21	AP2/B3-like transcriptional factor family protein [Source:TAIR;Acc:AT3G06160]
B3	AT5G58280	0.518878	0.391032	0.147154	0.399975	AT5G58280	AP2/B3-like transcriptional factor family protein [Source:TAIR;Acc:AT5G58280]
B3	AT5G18000	0.338457	0.251078	-0.253129	0.101113	VDD	VERDANDI [Source:TAIR;Acc:AT5G18000]
HRT-like	AT4G26170	0.0667451	0.00649305	0.125722	-0.233425	AT4G26170	FUNCTIONS IN: molecular_function unknown; INVOLVED IN: biological_process unknown; LOCATED IN: chloroplast; EXPRESSED IN: 7 plant structures; EXPRESSED DURING: F mature embryo stage, petal differentiation and expansion stage, E expanded cotyledon st /.../ bilateral stage; BEST Arabidopsis thaliana protein match is: effector of transcription2 (TAIR:AT5G56780.1); Has 75 Blast hits to 42 proteins in…
HRT-like	AT5G56780	-0.456885	-0.355136	0.241658	0.133445	ATET2	effector of transcription2 [Source:TAIR;Acc:AT5G56780]
GATA	AT4G16141	0.687539	0.344975	0.543404	0.78567	AT4G16141	GATA type zinc finger transcription factor family protein [Source:TAIR;Acc:AT4G16141]
GATA	AT1G51600	-0.110965	-0.045577	0.226755	0.218036	ZML2	ZIM-LIKE 2 [Source:TAIR;Acc:AT1G51600]
GATA	AT2G45050	-1.22715	-0.725074	0.0843839	0.224354	GATA2	GATA transcription factor 2 [Source:TAIR;Acc:AT2G45050]
GATA	AT3G45170	0.00133257	-0.071703	0.290342	-0.189119	GATA14	GATA transcription factor 14 [Source:TAIR;Acc:AT3G45170]
GATA	AT3G21175	0.0735761	0.0733271	0.436644	0.334998	ZML1	ZIM-like 1 [Source:TAIR;Acc:AT3G21175]
GATA	AT4G34680	0.1077	-0.0535868	-0.00335273	0.185693	GATA3	GATA transcription factor 3 [Source:TAIR;Acc:AT4G34680]
GATA	AT2G18380	0.073758	0.249803	-0.0140337	0.272491	GATA20	GATA transcription factor 20 [Source:TAIR;Acc:AT2G18380]
GATA	AT4G26150	0.572344	-0.293286	0.421046	0.635066	CGA1	cytokinin-responsive gata factor 1 [Source:TAIR;Acc:AT4G26150]
GATA	AT3G16870	0.862131	0.614787	-0.226692	0.122413	GATA17	GATA transcription factor 17 [Source:TAIR;Acc:AT3G16870]
GATA	AT5G26930	-0.497651	-0.445891	-0.267382	-0.518324	GATA23	GATA transcription factor 23 [Source:TAIR;Acc:AT5G26930]
GATA	AT5G56860	0.473586	0.300062	0.551318	0.696051	GNC	GATA type zinc finger transcription factor family protein [Source:TAIR;Acc:AT5G56860]
GATA	AT5G66320	0.0893538	0.0742424	0.140447	0.00121055	GATA5	GATA transcription factor 5 [Source:TAIR;Acc:AT5G66320]
GATA	AT3G24050	0.127388	0.0213526	-0.0587665	-0.041669	GATA1	GATA transcription factor 1 [Source:TAIR;Acc:AT3G24050]
GATA	AT2G28340	-0.647814	0.0210116	-0.643574	-0.202088	GATA13	GATA transcription factor 13 [Source:TAIR;Acc:AT2G28340]
GATA	AT5G49300	1.01886	0.525351	-0.126844	-0.0324794	GATA16	GATA transcription factor 16 [Source:TAIR;Acc:AT5G49300]
GATA	AT4G36620	0.277195	0.0350626	-0.29217	-0.46391	GATA19	GATA transcription factor 19 [Source:TAIR;Acc:AT4G36620]
GATA	AT1G08000	-0.231621	-0.274637	-0.303304	-0.246724	GATA10	GATA transcription factor 10 [Source:TAIR;Acc:AT1G08000]
GATA	AT3G50870	-0.279611	-0.446889	0.426577	0.1663	MNP	GATA type zinc finger transcription factor family protein [Source:TAIR;Acc:AT3G50870]
GATA	AT3G51080	-0.248288	-0.119566	-0.220225	-0.333058	GATA6	GATA transcription factor 6 [Source:TAIR;Acc:AT3G51080]
GATA	AT4G36240	-0.324311	0.0133277	-0.967391	-1.06463	GATA7	GATA transcription factor 7 [Source:TAIR;Acc:AT4G36240]
GATA	AT4G32890	-0.701707	-0.406278	-0.324431	-0.312111	GATA9	GATA transcription factor 9 [Source:TAIR;Acc:AT4G32890]
GATA	AT3G06740	0.955597	0.586846	-0.369751	-0.110102	GATA15	GATA transcription factor 15 [Source:TAIR;Acc:AT3G06740]
GATA	AT4G24470	-0.0165652	-0.0892438	0.238317	0.0404822	TIFY1	GATA-type zinc finger protein with TIFY domain [Source:TAIR;Acc:AT4G24470]
GATA	AT4G17570	0.0975968	0.188293	-0.173593	0.0190298	GATA26	GATA transcription factor 26 [Source:TAIR;Acc:AT4G17570]
GATA	AT3G60530	0.517418	0.245943	1.085	1.37285	GATA4	GATA transcription factor 4 [Source:TAIR;Acc:AT3G60530]
GATA	AT3G54810	0.590824	0.513404	-0.33143	-0.287095	BME3-ZF	Plant-specific GATA-type zinc finger transcription factor family protein [Source:TAIR;Acc:AT3G54810]
GATA	AT5G47140	0.123526	0.00176291	-0.432483	-0.143142	GATA27	GATA transcription factor 27 [Source:TAIR;Acc:AT5G47140]
GATA	AT5G25830	-0.218447	0.117774	-0.0789265	-0.570475	GATA12	GATA transcription factor 12 [Source:TAIR;Acc:AT5G25830]
GATA	AT3G20750	1.22392	0.338885	0.764266	0.240777	GATA29	GATA transcription factor 29 [Source:TAIR;Acc:AT3G20750]
GATA	AT1G08010	0.134953	0.113735	-0.291765	-0.255721	GATA11	GATA transcription factor 11 [Source:TAIR;Acc:AT1G08010]
WOX	AT3G03660	0.00279705	-0.00307784	-0.220237	-0.0945661	WOX11	WUSCHEL related homeobox 11 [Source:TAIR;Acc:AT3G03660]
WOX	AT5G17810	1.84714	0.805171	0.692036	0.545483	WOX12	WUSCHEL related homeobox 12 [Source:TAIR;Acc:AT5G17810]
WOX	AT2G01500	-0.318744	-0.291946	0.207026	0.261702	PFS2	Homeodomain-like superfamily protein [Source:TAIR;Acc:AT2G01500]
WOX	AT2G17950	-0.288718	0.182967	-0.656571	-0.565938	WUS	Homeodomain-like superfamily protein [Source:TAIR;Acc:AT2G17950]
WOX	AT5G46010					AT5G46010	Homeodomain-like superfamily protein [Source:TAIR;Acc:AT5G46010]
WOX	AT1G20700	0.469048	0.0611381	-0.419603	0.0690391	WOX14	WUSCHEL related homeobox 14 [Source:TAIR;Acc:AT1G20700]
WOX	AT2G28610	0.48639	0.19683	0.0571873	-0.206349	PRS	Homeodomain-like superfamily protein [Source:TAIR;Acc:AT2G28610]
WOX	AT5G45980		0.229221	1.04159	0.771137	WOX8	WUSCHEL related homeobox 8 [Source:TAIR;Acc:AT5G45980]
WOX	AT1G46480	0.100376	0.122439	-1.01598	-0.696407	WOX4	WUSCHEL related homeobox 4 [Source:TAIR;Acc:AT1G46480]
WOX	AT5G05770			0.0925513	0.104928	WOX7	WUSCHEL related homeobox 7 [Source:TAIR;Acc:AT5G05770]
WOX	AT3G18010	-0.0111376	0.234158	-0.362375	-0.207776	WOX1	WUSCHEL related homeobox 1 [Source:TAIR;Acc:AT3G18010]
WOX	AT4G35550	0.181402	0.200176	-0.213529	-0.230156	HB-4	WUSCHEL related homeobox 13 [Source:TAIR;Acc:AT4G35550]
WOX	AT1G20710	0.13409	0.21415	0.440991	0.135116	WOX10	WUSCHEL related homeobox 10 [Source:TAIR;Acc:AT1G20710]
WOX	AT3G11260	0.364682	0.0745268	0.0666956	0.240777	WOX5	WUSCHEL related homeobox 5 [Source:TAIR;Acc:AT3G11260]
WOX	AT2G33880	0.393988	0.103259	-0.211909	-0.127256	WOX9	homeobox-3 [Source:TAIR;Acc:AT2G33880]
WOX	AT5G59340	-0.108956	-0.00133682	0.300119	0.545906	WOX2	WUSCHEL related homeobox 2 [Source:TAIR;Acc:AT5G59340]
NF-YC	AT3G12480	-0.0566638	-0.0810416	0.108947	0.0874803	NF-YC11	nuclear factor Y, subunit C11 [Source:TAIR;Acc:AT3G12480]
NF-YC	AT5G43250	0.289602	0.0743435	-0.854107	-0.469783	NF-YC13	nuclear factor Y, subunit C13 [Source:TAIR;Acc:AT5G43250]
NF-YC	AT1G54830	0.0394006	0.0966551	-0.267109	-0.181539	NF-YC3	nuclear factor Y, subunit C3 [Source:TAIR;Acc:AT1G54830]
NF-YC	AT5G19490	-0.017933	0.182616	0.222442	0.136388	AT5G19490	Histone superfamily protein [Source:TAIR;Acc:AT5G19490]
NF-YC	AT5G50480	-0.698582	-0.592866	-0.113744	-0.75545	NF-YC6	nuclear factor Y, subunit C6 [Source:TAIR;Acc:AT5G50480]
NF-YC	AT3G48590	0.169919	0.107222	0.458953	0.387545	HAP5A	nuclear factor Y, subunit C1 [Source:TAIR;Acc:AT3G48590]
NF-YC	AT1G07980	0.135815	0.0411537	-0.110557	-0.171708	NF-YC10	nuclear factor Y, subunit C10 [Source:TAIR;Acc:AT1G07980]
NF-YC	AT5G63470	0.44812	0.19473	0.701292	0.764985	NF-YC4	nuclear factor Y, subunit C4 [Source:TAIR;Acc:AT5G63470]
NF-YC	AT1G08970	0.206343	0.12846	-0.166505	-0.195493	HAP5C	nuclear factor Y, subunit C9 [Source:TAIR;Acc:AT1G08970]
NF-YC	AT5G50490	-0.241054	-0.210394	-0.50967	0.13	NF-YC5	nuclear factor Y, subunit C5 [Source:TAIR;Acc:AT5G50490]
NF-YC	AT5G50470	-0.417068	-0.188229	-0.206344	-0.998015	NF-YC7	nuclear factor Y, subunit C7 [Source:TAIR;Acc:AT5G50470]
NF-YC	AT5G38140	-0.139696	-0.0243829	0.267663	0.179023	NF-YC12	nuclear factor Y, subunit C12 [Source:TAIR;Acc:AT5G38140]
NF-YC	AT5G27910	0.00340309	0.048091	0.0347696	-0.0761631	NF-YC8	nuclear factor Y, subunit C8 [Source:TAIR;Acc:AT5G27910]
NF-YC	AT1G56170	-0.484069	-0.292111	-0.502046	-0.765374	HAP5B	nuclear factor Y, subunit C2 [Source:TAIR;Acc:AT1G56170]
Dof	AT5G60200	0.510782	0.285082	0.373825	0.493192	TMO6	TARGET OF MONOPTEROS 6 [Source:TAIR;Acc:AT5G60200]
Dof	AT1G29160	0.543921	0.59978	-0.0779891	-0.112234	DOF1.5	Dof-type zinc finger DNA-binding family protein [Source:TAIR;Acc:AT1G29160]
Dof	AT1G21340	-0.87246	-0.360817	0.230522	-0.418861	AT1G21340	Dof-type zinc finger DNA-binding family protein [Source:TAIR;Acc:AT1G21340]
Dof	AT4G21040					DOF4.3	Dof-type zinc finger domain-containing protein [Source:TAIR;Acc:AT4G21040]
Dof	AT4G21080	0.000819922	-0.0620626	-0.0965249	-0.0965112	DOF4.5	Dof-type zinc finger domain-containing protein [Source:TAIR;Acc:AT4G21080]
Dof	AT5G62430	-0.427946	-0.189448	-0.157588	-0.328552	CDF1	cycling DOF factor 1 [Source:TAIR;Acc:AT5G62430]
Dof	AT2G28510	0.311632	0.339358	0.00228987	0.17508	DOF2.1	Dof-type zinc finger DNA-binding family protein [Source:TAIR;Acc:AT2G28510]
Dof	AT5G60850	-0.475038	-0.208827	0.185427	0.0587326	OBP4	OBF binding protein 4 [Source:TAIR;Acc:AT5G60850]
Dof	AT5G66940	1.11659	0.737387	0.443506	-0.0864457	AT5G66940	Dof-type zinc finger DNA-binding family protein [Source:TAIR;Acc:AT5G66940]
Dof	AT1G64620	-0.602089	-0.304954	-0.253703	-0.158772	DOF1.8	Dof-type zinc finger DNA-binding family protein [Source:TAIR;Acc:AT1G64620]
Dof	AT3G61850	0.277057	0.305379	0.455727	0.629979	DAG1	Dof-type zinc finger DNA-binding family protein [Source:TAIR;Acc:AT3G61850]
Dof	AT4G00940	0.17448	0.288284	0.512622	0.390147	DOF4.1	Dof-type zinc finger DNA-binding family protein [Source:TAIR;Acc:AT4G00940]
Dof	AT4G21030			0.0878283		ATDOF4.2	Dof-type zinc finger domain-containing protein [Source:TAIR;Acc:AT4G21030]
Dof	AT1G28310	0.459063	0.473701	0.19173	0.561106	DOF1.4	Dof-type zinc finger DNA-binding family protein [Source:TAIR;Acc:AT1G28310]
Dof	AT2G37590	0.472054	0.20427	0.237394	0.250489	ATDOF2.4	DNA binding with one finger 2.4 [Source:TAIR;Acc:AT2G37590]
Dof	AT2G46590	-0.407703	-0.214279	-0.35801	-0.195541	DAG2	Dof-type zinc finger DNA-binding family protein [Source:TAIR;Acc:AT2G46590]
Dof	AT3G55370	0.131775	0.31593	0.00247024	0.177726	OBP3	OBF-binding protein 3 [Source:TAIR;Acc:AT3G55370]
Dof	AT5G65590	0.318485	0.203897	0.299902	0.220724	AT5G65590	Dof-type zinc finger DNA-binding family protein [Source:TAIR;Acc:AT5G65590]
Dof	AT1G07640	-0.143928	0.230527	-0.310895	-0.215185	OBP2	Dof-type zinc finger DNA-binding family protein [Source:TAIR;Acc:AT1G07640]
Dof	AT4G38000	0.305536	-0.132785	0.700226	0.763057	DOF4.7	DNA binding with one finger 4.7 [Source:TAIR;Acc:AT4G38000]
Dof	AT2G34140	0.259267	0.242435	-0.348165	0.1116	CDF4	Dof-type zinc finger DNA-binding family protein [Source:TAIR;Acc:AT2G34140]
Dof	AT5G62940	0.00129686	0.0393169	-0.149282	-0.202609	HCA2	Dof-type zinc finger DNA-binding family protein [Source:TAIR;Acc:AT5G62940]
Dof	AT3G50410	0.592321	0.608053	0.427472	0.362449	OBP1	OBF binding protein 1 [Source:TAIR;Acc:AT3G50410]
Dof	AT5G39660	-0.901878	-0.874205	0.0594967	-0.198199	CDF2	cycling DOF factor 2 [Source:TAIR;Acc:AT5G39660]
Dof	AT2G28810	-0.122393	0.329158	0.117053	0.258614	DOF2.2	Dof-type zinc finger DNA-binding family protein [Source:TAIR;Acc:AT2G28810]
Dof	AT4G24060	0.357439	0.3291	-0.00579621	0.237287	AT4G24060	Dof-type zinc finger DNA-binding family protein [Source:TAIR;Acc:AT4G24060]
Dof	AT1G47655	0.511991	0.168381	1.15708	0.88383	DOF1.6	Dof-type zinc finger DNA-binding family protein [Source:TAIR;Acc:AT1G47655]
Dof	AT1G69570	-0.839241	-0.621271	-0.148007	-0.214254	CDF5	Dof-type zinc finger DNA-binding family protein [Source:TAIR;Acc:AT1G69570]
Dof	AT3G45610	0.0388088	0.227638	0.371689	0.4534	DOF3.2	Dof-type zinc finger DNA-binding family protein [Source:TAIR;Acc:AT3G45610]
Dof	AT1G51700	-0.906721	-0.568084	-0.791421	-0.773648	ADOF1	DOF zinc finger protein 1 [Source:TAIR;Acc:AT1G51700]
Dof	AT3G52440	-0.987739	-0.252773	-0.912461	-0.803709	DOF3.5	Dof-type zinc finger DNA-binding family protein [Source:TAIR;Acc:AT3G52440]
Dof	AT3G47500	-0.42841	-0.00388772	-0.211255	-0.242057	CDF3	cycling DOF factor 3 [Source:TAIR;Acc:AT3G47500]
Dof	AT5G02460	-0.159235	0.0739329	-0.156974	-0.322965	DOF5.1	Dof-type zinc finger DNA-binding family protein [Source:TAIR;Acc:AT5G02460]
Dof	AT4G21050					DOF4.4	Dof-type zinc finger domain-containing protein [Source:TAIR;Acc:AT4G21050]
Dof	AT1G26790	-1.37929	-1.18115	-1.4972	-1.63393	DOF1.3	Dof-type zinc finger DNA-binding family protein [Source:TAIR;Acc:AT1G26790]
Dof	AT3G21270	0.105138	0.346701	-0.261629	-0.042694	ADOF2	DOF zinc finger protein 2 [Source:TAIR;Acc:AT3G21270]

## Sheet: S3
Table S3. Expression changes of miRNAs and miRNA targets in Col-0, amiR zf-HD, and hbq.
miRNA	amiR zf-HD	hbq	HB31SRDX	HB21SRDX	Target	amiR zf-HD	hbq	HB31SRDX	HB21SRDX	target name	target description
ath-miR779.2	0.439348	0.498449	-0.83326	-0.329509	AT5G38096	0.927146	0.661161	-0.150878	0.00741967	AT5G38096	Pseudogene of AT5G38100; methyltransferase-related protein [Source:TAIR;Acc:AT5G38096]	ath-miR163,ath-miR779.2
ath-miR779.2	0.439348	0.498449	-0.83326	-0.329509	AT1G18370	0.590579	0.301864	-0.2382	-0.172778	HIK	ATP binding microtubule motor family protein [Source:TAIR;Acc:AT1G18370]	ath-miR779.2
ath-miR319c	0.759399	0.564809	-0.438062	-0.249543	AT2G31070	0.709046	0.560659	0.0462624	0.253743	TCP10	TCP domain protein 10 [Source:TAIR;Acc:AT2G31070]	ath-miR319a,ath-miR319b,ath-miR319c
ath-miR319c	0.759399	0.564809	-0.438062	-0.249543	AT3G15030	-0.475744	-0.148989	-0.691693	-0.468241	TCP4	TCP family transcription factor 4 [Source:TAIR;Acc:AT3G15030]	ath-miR319a,ath-miR319b,ath-miR319c
ath-miR319c	0.759399	0.564809	-0.438062	-0.249543	AT2G29570	0.32909	0.0414481	-0.155264	-0.151981	PCNA2	proliferating cell nuclear antigen 2 [Source:TAIR;Acc:AT2G29570]	ath-miR159c,ath-miR319a,ath-miR319b,ath-miR319c
ath-miR319c	0.759399	0.564809	-0.438062	-0.249543	AT1G53230	0.345759	0.333678	-0.333665	-0.086696	TCP3	TEOSINTE BRANCHED 1, cycloidea and PCF transcription factor 3 [Source:TAIR;Acc:AT1G53230]	ath-miR319a,ath-miR319b,ath-miR319c
ath-miR319a	0.759434	0.564842	-0.437738	-0.249742	AT3G21140	0.306589	0.106709	0.0191608	0.0876185	AT3G21140	Pyridoxamine 5'-phosphate oxidase family protein [Source:TAIR;Acc:AT3G21140]	ath-miR319a,ath-miR319b
ath-miR319a	0.759434	0.564842	-0.437738	-0.249742	AT2G31070	0.709046	0.560659	0.0462624	0.253743	TCP10	TCP domain protein 10 [Source:TAIR;Acc:AT2G31070]	ath-miR319a,ath-miR319b,ath-miR319c
ath-miR319a	0.759434	0.564842	-0.437738	-0.249742	AT5G60200	0.510782	0.285082	0.373825	0.493192	TMO6	TARGET OF MONOPTEROS 6 [Source:TAIR;Acc:AT5G60200]	ath-miR319a,ath-miR319b
ath-miR319a	0.759434	0.564842	-0.437738	-0.249742	AT3G15030	-0.475744	-0.148989	-0.691693	-0.468241	TCP4	TCP family transcription factor 4 [Source:TAIR;Acc:AT3G15030]	ath-miR319a,ath-miR319b,ath-miR319c
ath-miR319a	0.759434	0.564842	-0.437738	-0.249742	AT2G29570	0.32909	0.0414481	-0.155264	-0.151981	PCNA2	proliferating cell nuclear antigen 2 [Source:TAIR;Acc:AT2G29570]	ath-miR159c,ath-miR319a,ath-miR319b,ath-miR319c
ath-miR319a	0.759434	0.564842	-0.437738	-0.249742	AT1G53230	0.345759	0.333678	-0.333665	-0.086696	TCP3	TEOSINTE BRANCHED 1, cycloidea and PCF transcription factor 3 [Source:TAIR;Acc:AT1G53230]	ath-miR319a,ath-miR319b,ath-miR319c
ath-miR319a	0.759434	0.564842	-0.437738	-0.249742	AT5G67090	0.986529	0.716857	-0.147215	-0.216272	AT5G67090	Subtilisin-like serine endopeptidase family protein [Source:TAIR;Acc:AT5G67090]	ath-miR159a,ath-miR159b,ath-miR319a,ath-miR319b
ath-miR319b	0.759434	0.564842	-0.437738	-0.249742	AT3G21140	0.306589	0.106709	0.0191608	0.0876185	AT3G21140	Pyridoxamine 5'-phosphate oxidase family protein [Source:TAIR;Acc:AT3G21140]	ath-miR319a,ath-miR319b
ath-miR319b	0.759434	0.564842	-0.437738	-0.249742	AT2G31070	0.709046	0.560659	0.0462624	0.253743	TCP10	TCP domain protein 10 [Source:TAIR;Acc:AT2G31070]	ath-miR319a,ath-miR319b,ath-miR319c
ath-miR319b	0.759434	0.564842	-0.437738	-0.249742	AT5G60200	0.510782	0.285082	0.373825	0.493192	TMO6	TARGET OF MONOPTEROS 6 [Source:TAIR;Acc:AT5G60200]	ath-miR319a,ath-miR319b
ath-miR319b	0.759434	0.564842	-0.437738	-0.249742	AT3G15030	-0.475744	-0.148989	-0.691693	-0.468241	TCP4	TCP family transcription factor 4 [Source:TAIR;Acc:AT3G15030]	ath-miR319a,ath-miR319b,ath-miR319c
ath-miR319b	0.759434	0.564842	-0.437738	-0.249742	AT2G29570	0.32909	0.0414481	-0.155264	-0.151981	PCNA2	proliferating cell nuclear antigen 2 [Source:TAIR;Acc:AT2G29570]	ath-miR159c,ath-miR319a,ath-miR319b,ath-miR319c
ath-miR319b	0.759434	0.564842	-0.437738	-0.249742	AT1G53230	0.345759	0.333678	-0.333665	-0.086696	TCP3	TEOSINTE BRANCHED 1, cycloidea and PCF transcription factor 3 [Source:TAIR;Acc:AT1G53230]	ath-miR319a,ath-miR319b,ath-miR319c
ath-miR319b	0.759434	0.564842	-0.437738	-0.249742	AT5G67090	0.986529	0.716857	-0.147215	-0.216272	AT5G67090	Subtilisin-like serine endopeptidase family protein [Source:TAIR;Acc:AT5G67090]	ath-miR159a,ath-miR159b,ath-miR319a,ath-miR319b
ath-miR839	0.759088	-0.267643	-0.223038	-0.639543	AT2G27350	-0.0462201	0.0290988	0.187085	0.198733	AT2G27350	OTU-like cysteine protease family protein [Source:TAIR;Acc:AT2G27350]	ath-miR839
ath-miR839	0.759088	-0.267643	-0.223038	-0.639543	AT5G35490	-1.59121	-0.35962	-0.196619	-0.0490056	ATMRU1	mto 1 responding up 1 [Source:TAIR;Acc:AT5G35490]	ath-miR839
ath-miR856	0.814252	0.0829219	-0.535154	-1.15506	AT2G46800	-0.280091	-0.37487	0.3795	0.377217	ZAT	zinc transporter of Arabidopsis thaliana [Source:TAIR;Acc:AT2G46800]	ath-miR856
ath-miR856	0.814252	0.0829219	-0.535154	-1.15506	AT1G64960	0.10011	0.113896	0.223624	0.283148	AT1G64960	ARM repeat superfamily protein [Source:TAIR;Acc:AT1G64960]	ath-miR856
ath-miR856	0.814252	0.0829219	-0.535154	-1.15506	AT3G10180	0.247801	-0.0289351	0.0466743	-0.0749346	AT3G10180	P-loop containing nucleoside triphosphate hydrolases superfamily protein [Source:TAIR;Acc:AT3G10180]	ath-miR856
ath-miR856	0.814252	0.0829219	-0.535154	-1.15506	AT1G64065	-1.37331	-0.432269	-0.345561	-0.220306	AT1G64065	Late embryogenesis abundant (LEA) hydroxyproline-rich glycoprotein family [Source:TAIR;Acc:AT1G64065]	ath-miR856
ath-miR856	0.814252	0.0829219	-0.535154	-1.15506	AT3G02050	-0.289446	-0.265441	-0.515088	-0.600404	KUP3	K+ uptake transporter 3 [Source:TAIR;Acc:AT3G02050]	ath-miR856
ath-miR856	0.814252	0.0829219	-0.535154	-1.15506	AT3G16560	0.0677543	0.0179794	-0.112945	-0.31791	AT3G16560	Protein phosphatase 2C family protein [Source:TAIR;Acc:AT3G16560]	ath-miR856
ath-miR780.1	0.383752	-0.009248	-0.772984	-1.03336	AT4G32910	0.096393	0.0227041	0.862828	0.862441	NUP85	CONTAINS InterPro DOMAIN/s: Nuclear pore complex protein, Nucleoporin Nup85-like (InterPro:IPR011502); Has 30201 Blast hits to 17322 proteins in 780 species: Archae - 12; Bacteria - 1396; Metazoa - 17338; Fungi - 3422; Plants - 5037; Viruses - 0; Ot /.../karyotes - 2996 (source: NCBI BLink). [Source:TAIR;Acc:AT4G32910]	ath-miR780.1
ath-miR780.1	0.383752	-0.009248	-0.772984	-1.03336	AT4G15080	0.0865692	-0.0138193	0.301387	0.383354	AT4G15080	DHHC-type zinc finger family protein [Source:TAIR;Acc:AT4G15080]	ath-miR780.1
ath-miR780.1	0.383752	-0.009248	-0.772984	-1.03336	AT3G18520	0.000666909	-0.0764364	0.470766	0.30612	HDA15	histone deacetylase 15 [Source:TAIR;Acc:AT3G18520]	ath-miR780.1
ath-miR780.1	0.383752	-0.009248	-0.772984	-1.03336	AT2G23760	-0.951625	-0.586428	-0.263369	-0.0343814	BLH4	BEL1-like homeodomain 4 [Source:TAIR;Acc:AT2G23760]	ath-miR447a.2_3p,ath-miR780.1
ath-miR780.1	0.383752	-0.009248	-0.772984	-1.03336	AT5G63220	0.044927	0.0846574	-0.451053	-0.414279	AT5G63220	unknown protein; CONTAINS InterPro DOMAIN/s: Uncharacterised protein family UPF0363 (InterPro:IPR007317); Has 304 Blast hits to 301 proteins in 161 species: Archae - 0; Bacteria - 0; Metazoa - 110; Fungi - 121; Plants - 35; Viruses - 0; Other Eukary /.../ 38 (source: NCBI BLink). [Source:TAIR;Acc:AT5G63220]	ath-miR780.1
ath-miR780.1	0.383752	-0.009248	-0.772984	-1.03336	AT3G52940	0.264817	0.214127	-0.43963	-0.342061	FK	Ergosterol biosynthesis ERG4/ERG24 family [Source:TAIR;Acc:AT3G52940]	ath-miR780.1
ath-miR780.2	0.324621	0.15248	-0.79236	-0.861913	AT1G26270	-0.215558	-0.19532	0.386643	0.26405	AT1G26270	Phosphatidylinositol 3- and 4-kinase family protein [Source:TAIR;Acc:AT1G26270]	ath-miR780.2
ath-miR780.2	0.324621	0.15248	-0.79236	-0.861913	AT5G53010	-0.0847962	-0.0285223	0.417272	0.247109	AT5G53010	calcium-transporting ATPase, putative [Source:TAIR;Acc:AT5G53010]	ath-miR780.2
ath-miR780.2	0.324621	0.15248	-0.79236	-0.861913	AT3G62610	-0.547797	0.259791	-1.88077	-1.86135	ATMYB11	myb domain protein 11 [Source:TAIR;Acc:AT3G62610]	ath-miR780.2,ath-miR858a,ath-miR858b
ath-miR780.2	0.324621	0.15248	-0.79236	-0.861913	AT3G14940	-0.93152	-0.303345	-0.546506	-1.14106	ATPPC3	phosphoenolpyruvate carboxylase 3 [Source:TAIR;Acc:AT3G14940]	ath-miR780.2
ath-miR780.2	0.324621	0.15248	-0.79236	-0.861913	AT1G67290	-0.953102	-0.819326	-0.812484	-1.02823	AT1G67290	glyoxal oxidase-related protein [Source:TAIR;Acc:AT1G67290]	ath-miR780.2
ath-miR780.2	0.324621	0.15248	-0.79236	-0.861913	AT2G04490	-0.966583	-0.653593	-0.544268	-0.769282	AT2G04490	transposable element gene [Source:TAIR;Acc:AT2G04490]	ath-miR159a,ath-miR159b,ath-miR780.2
ath-miR780.2	0.324621	0.15248	-0.79236	-0.861913	AT3G25600	-0.587039	-0.285877	-0.680676	-0.595508	CML16	Calcium-binding EF-hand family protein [Source:TAIR;Acc:AT3G25600]	ath-miR780.2
ath-miR824	0.0827797	0.00478654	-1.12761	-0.636473	AT2G28150	0.240239	0.135817	0.983201	1.06551	AT2G28150	Domain of unknown function (DUF966) [Source:TAIR;Acc:AT2G28150]	ath-miR824
ath-miR824	0.0827797	0.00478654	-1.12761	-0.636473	AT4G04885	0.0578139	-0.0635747	0.225735	0.192641	PCFS4	PCF11P-similar protein 4 [Source:TAIR;Acc:AT4G04885]	ath-miR824
ath-miR824	0.0827797	0.00478654	-1.12761	-0.636473	AT5G65760	0.335804	0.240369	0.393824	0.385859	AT5G65760	Serine carboxypeptidase S28 family protein [Source:TAIR;Acc:AT5G65760]	ath-miR824
ath-miR824	0.0827797	0.00478654	-1.12761	-0.636473	AT4G28000	-0.937065	-0.807667	-0.615535	-0.951289	AT4G28000	P-loop containing nucleoside triphosphate hydrolases superfamily protein [Source:TAIR;Acc:AT4G28000]	ath-miR824
ath-miR824	0.0827797	0.00478654	-1.12761	-0.636473	AT3G15810	-0.926971	-0.599465	-0.59715	-0.5844	AT3G15810	Protein of unknown function (DUF567) [Source:TAIR;Acc:AT3G15810]	ath-miR824
ath-miR824	0.0827797	0.00478654	-1.12761	-0.636473	AT1G21590	-0.80803	-0.439447	-0.316076	-0.34088	AT1G21590	Protein kinase protein with adenine nucleotide alpha hydrolases-like domain [Source:TAIR;Acc:AT1G21590]	ath-miR824
ath-miR824	0.0827797	0.00478654	-1.12761	-0.636473	AT2G33580	-0.323131	-0.352536	-0.464306	-0.334993	LYK5	Protein kinase superfamily protein [Source:TAIR;Acc:AT2G33580]	ath-miR824
ath-miR824	0.0827797	0.00478654	-1.12761	-0.636473	AT5G52882	0.331071	0.253755	-0.742945	-0.0272582	AT5G52882	P-loop containing nucleoside triphosphate hydrolases superfamily protein [Source:TAIR;Acc:AT5G52882]	ath-miR824
ath-miR168a	-0.257432	0.0162648	-0.823637	-0.820217	AT4G01580	0.36185	0.148255	1.01227	1.09334	AT4G01580	AP2/B3-like transcriptional factor family protein [Source:TAIR;Acc:AT4G01580]	ath-miR168a,ath-miR168b
ath-miR168a	-0.257432	0.0162648	-0.823637	-0.820217	AT3G13360	0.152127	0.0379314	0.358386	0.540808	WIP3	WPP domain interacting protein 3 [Source:TAIR;Acc:AT3G13360]	ath-miR168a
ath-miR168a	-0.257432	0.0162648	-0.823637	-0.820217	AT2G43290	-0.654455	-0.352681	-0.855364	-0.802369	MSS3	Calcium-binding EF-hand family protein [Source:TAIR;Acc:AT2G43290]	ath-miR168a
ath-miR168a	-0.257432	0.0162648	-0.823637	-0.820217	AT2G46480	-0.393487	-0.400615	-0.261297	-0.56173	GAUT2	galacturonosyltransferase 2 [Source:TAIR;Acc:AT2G46480]	ath-miR168a,ath-miR168b
ath-miR168b	-0.257432	0.0162648	-0.823637	-0.820217	AT5G24910	0.684793	0.157914	1.94484	1.58573	CYP714A1	cytochrome P450, family 714, subfamily A, polypeptide 1 [Source:TAIR;Acc:AT5G24910]	ath-miR168b
ath-miR168b	-0.257432	0.0162648	-0.823637	-0.820217	AT4G01580	0.36185	0.148255	1.01227	1.09334	AT4G01580	AP2/B3-like transcriptional factor family protein [Source:TAIR;Acc:AT4G01580]	ath-miR168a,ath-miR168b
ath-miR168b	-0.257432	0.0162648	-0.823637	-0.820217	AT4G20400	0.11456	0.100108	0.391038	0.361406	JMJ14	JUMONJI 14 [Source:TAIR;Acc:AT4G20400]	ath-miR168b
ath-miR168b	-0.257432	0.0162648	-0.823637	-0.820217	AT3G44690	-0.43788	-0.343655	-0.0208396	-0.477649	AT3G44690	unknown protein; Has 30201 Blast hits to 17322 proteins in 780 species: Archae - 12; Bacteria - 1396; Metazoa - 17338; Fungi - 3422; Plants - 5037; Viruses - 0; Other Eukaryotes - 2996 (source: NCBI BLink). [Source:TAIR;Acc:AT3G44690]	ath-miR168b
ath-miR168b	-0.257432	0.0162648	-0.823637	-0.820217	AT2G46480	-0.393487	-0.400615	-0.261297	-0.56173	GAUT2	galacturonosyltransferase 2 [Source:TAIR;Acc:AT2G46480]	ath-miR168a,ath-miR168b
ath-miR168b	-0.257432	0.0162648	-0.823637	-0.820217	AT3G21480	0.165511	-0.0474253	-0.296096	-0.233176	AT3G21480	BRCT domain-containing DNA repair protein [Source:TAIR;Acc:AT3G21480]	ath-miR168b,ath-miR391
ath-miR829.1	-0.0369249	0.55504	-0.669274	-0.874466	AT3G14090	0.589483	0.174646	0.149261	0.359187	ATEXO70D3	exocyst subunit exo70 family protein D3 [Source:TAIR;Acc:AT3G14090]	ath-miR829.1
ath-miR829.1	-0.0369249	0.55504	-0.669274	-0.874466	AT2G45000	0.40096	0.225223	0.560053	0.487225	EMB2766	structural constituent of nuclear pore [Source:TAIR;Acc:AT2G45000]	ath-miR829.1
ath-miR829.1	-0.0369249	0.55504	-0.669274	-0.874466	AT5G02130	0.258051	0.259577	0.419765	0.50079	NDP1	Tetratricopeptide repeat (TPR)-like superfamily protein [Source:TAIR;Acc:AT5G02130]	ath-miR829.1
ath-miR829.1	-0.0369249	0.55504	-0.669274	-0.874466	AT1G33360	-0.490844	-0.24475	-0.32877	-0.516923	AT1G33360	ATP-dependent Clp protease [Source:TAIR;Acc:AT1G33360]	ath-miR829.1
ath-miR829.1	-0.0369249	0.55504	-0.669274	-0.874466	AT3G54750	0.340181	0.0587427	-0.226194	-0.297051	AT3G54750	unknown protein; Has 145 Blast hits to 145 proteins in 60 species: Archae - 0; Bacteria - 0; Metazoa - 99; Fungi - 0; Plants - 40; Viruses - 0; Other Eukaryotes - 6 (source: NCBI BLink). [Source:TAIR;Acc:AT3G54750]	ath-miR829.1
ath-miR393a	-0.00787527	0.190563	-0.54606	-0.669264	AT3G62980	-0.105822	-0.0858111	0.822689	0.767159	TIR1	F-box/RNI-like superfamily protein [Source:TAIR;Acc:AT3G62980]	ath-miR393a,ath-miR393b
ath-miR393a	-0.00787527	0.190563	-0.54606	-0.669264	AT3G26922	0.000967161	-0.248211	0.380889	0.344538	AT3G26922	F-box/RNI-like superfamily protein [Source:TAIR;Acc:AT3G26922]	ath-miR393a,ath-miR393b
ath-miR393a	-0.00787527	0.190563	-0.54606	-0.669264	AT2G33540	0.0283221	0.00552063	0.214038	0.277449	CPL3	C-terminal domain phosphatase-like 3 [Source:TAIR;Acc:AT2G33540]	ath-miR393a,ath-miR393b
ath-miR393a	-0.00787527	0.190563	-0.54606	-0.669264	AT1G12820	-0.0484848	-0.106241	0.268338	0.306277	AFB3	auxin signaling F-box 3 [Source:TAIR;Acc:AT1G12820]	ath-miR393a,ath-miR393b
ath-miR393a	-0.00787527	0.190563	-0.54606	-0.669264	AT4G03190	0.530663	0.473212	-0.0148672	0.30873	GRH1	GRR1-like protein 1 [Source:TAIR;Acc:AT4G03190]	ath-miR393a,ath-miR393b
ath-miR393a	-0.00787527	0.190563	-0.54606	-0.669264	AT5G67550	-1.33758	-0.488934	-0.517378	-1.4712	AT5G67550	unknown protein; FUNCTIONS IN: molecular_function unknown; INVOLVED IN: biological_process unknown; LOCATED IN: endomembrane system; EXPRESSED IN: flower; EXPRESSED DURING: 4 anthesis; BEST Arabidopsis thaliana protein match is: unknown protein (TAI /.../71110.1); Has 161 Blast hits to 154 proteins in 16 species: Archae - 0; Bacteria - 0; Metazoa - 0; Fungi - 0; Plants - 161; Viruses - 0; Other E…	ath-miR393a,ath-miR393b
ath-miR393a	-0.00787527	0.190563	-0.54606	-0.669264	AT1G26850	0.121366	0.124946	-0.400884	-0.397704	AT1G26850	S-adenosyl-L-methionine-dependent methyltransferases superfamily protein [Source:TAIR;Acc:AT1G26850]	ath-miR393a
ath-miR393b	-0.00787527	0.190563	-0.54606	-0.669264	AT3G62980	-0.105822	-0.0858111	0.822689	0.767159	TIR1	F-box/RNI-like superfamily protein [Source:TAIR;Acc:AT3G62980]	ath-miR393a,ath-miR393b
ath-miR393b	-0.00787527	0.190563	-0.54606	-0.669264	AT3G26922	0.000967161	-0.248211	0.380889	0.344538	AT3G26922	F-box/RNI-like superfamily protein [Source:TAIR;Acc:AT3G26922]	ath-miR393a,ath-miR393b
ath-miR393b	-0.00787527	0.190563	-0.54606	-0.669264	AT2G33540	0.0283221	0.00552063	0.214038	0.277449	CPL3	C-terminal domain phosphatase-like 3 [Source:TAIR;Acc:AT2G33540]	ath-miR393a,ath-miR393b
ath-miR393b	-0.00787527	0.190563	-0.54606	-0.669264	AT1G12820	-0.0484848	-0.106241	0.268338	0.306277	AFB3	auxin signaling F-box 3 [Source:TAIR;Acc:AT1G12820]	ath-miR393a,ath-miR393b
ath-miR393b	-0.00787527	0.190563	-0.54606	-0.669264	AT4G03190	0.530663	0.473212	-0.0148672	0.30873	GRH1	GRR1-like protein 1 [Source:TAIR;Acc:AT4G03190]	ath-miR393a,ath-miR393b
ath-miR393b	-0.00787527	0.190563	-0.54606	-0.669264	AT5G67550	-1.33758	-0.488934	-0.517378	-1.4712	AT5G67550	unknown protein; FUNCTIONS IN: molecular_function unknown; INVOLVED IN: biological_process unknown; LOCATED IN: endomembrane system; EXPRESSED IN: flower; EXPRESSED DURING: 4 anthesis; BEST Arabidopsis thaliana protein match is: unknown protein (TAI /.../71110.1); Has 161 Blast hits to 154 proteins in 16 species: Archae - 0; Bacteria - 0; Metazoa - 0; Fungi - 0; Plants - 161; Viruses - 0; Other E…	ath-miR393a,ath-miR393b
ath-miR393b	-0.00787527	0.190563	-0.54606	-0.669264	AT3G48510	-1.2822	-1.04772	-0.512512	-0.956092	AT3G48510	unknown protein; BEST Arabidopsis thaliana protein match is: unknown protein (TAIR:AT5G63350.1); Has 98 Blast hits to 98 proteins in 11 species: Archae - 0; Bacteria - 0; Metazoa - 0; Fungi - 0; Plants - 98; Viruses - 0; Other Eukaryotes - 0 (source /.../ BLink). [Source:TAIR;Acc:AT3G48510]	ath-miR393b
ath-miR396a	-0.0525413	0.027627	-0.326317	-0.735965	AT2G36400	0.963189	0.675902	1.09768	1.29983	AtGRF3	growth-regulating factor 3 [Source:TAIR;Acc:AT2G36400]	ath-miR396a,ath-miR396b
ath-miR396a	-0.0525413	0.027627	-0.326317	-0.735965	AT4G24150	-0.153553	-0.322677	0.707273	0.588293	AtGRF8	growth-regulating factor 8 [Source:TAIR;Acc:AT4G24150]	ath-miR396a,ath-miR396b
ath-miR396a	-0.0525413	0.027627	-0.326317	-0.735965	AT1G75295	0.0392066	0.0904009	0.654689	0.606187	AT1G75295	other RNA [Source:TAIR;Acc:AT1G75295]	ath-miR396a,ath-miR396b
ath-miR396a	-0.0525413	0.027627	-0.326317	-0.735965	AT1G80060	-0.178244	-0.118408	0.587311	0.608392	AT1G80060	Ubiquitin-like superfamily protein [Source:TAIR;Acc:AT1G80060]	ath-miR396a,ath-miR396b
ath-miR396a	-0.0525413	0.027627	-0.326317	-0.735965	AT4G33150	-0.577337	-0.137095	0.80947	0.875293	LKR/SDH	lysine-ketoglutarate reductase/saccharopine dehydrogenase bifunctional enzyme [Source:TAIR;Acc:AT4G33150]	ath-miR396a
ath-miR396a	-0.0525413	0.027627	-0.326317	-0.735965	AT1G60140	-0.159273	-0.223279	1.20005	0.956729	ATTPS10	trehalose phosphate synthase [Source:TAIR;Acc:AT1G60140]	ath-miR396a,ath-miR396b
ath-miR396a	-0.0525413	0.027627	-0.326317	-0.735965	AT5G53660	1.44344	1.20414	0.876895	0.619159	AtGRF7	growth-regulating factor 7 [Source:TAIR;Acc:AT5G53660]	ath-miR396a,ath-miR396b
ath-miR396a	-0.0525413	0.027627	-0.326317	-0.735965	AT3G52910	-0.269759	0.146606	0.128043	0.39342	AtGRF4	growth-regulating factor 4 [Source:TAIR;Acc:AT3G52910]	ath-miR396a,ath-miR396b
ath-miR396a	-0.0525413	0.027627	-0.326317	-0.735965	AT2G04270	0.187181	0.085046	0.373317	0.311764	RNEE/G	RNAse E/G-like [Source:TAIR;Acc:AT2G04270]	ath-miR396a,ath-miR396b
ath-miR396a	-0.0525413	0.027627	-0.326317	-0.735965	AT1G67120	0.447133	0.130147	0.28954	0.242503	AT1G67120	ATPases;nucleotide binding;ATP binding;nucleoside-triphosphatases;transcription factor binding [Source:TAIR;Acc:AT1G67120]	ath-miR396a,ath-miR869.2
ath-miR396a	-0.0525413	0.027627	-0.326317	-0.735965	AT1G10120	0.23708	0.0913526	0.0387787	0.209084	BHLH74	basic helix-loop-helix (bHLH) DNA-binding superfamily protein [Source:TAIR;Acc:AT1G10120]	ath-miR396a
ath-miR396a	-0.0525413	0.027627	-0.326317	-0.735965	AT5G43060	0.368346	-0.0105902	0.217912	0.493819	AT5G43060	Granulin repeat cysteine protease family protein [Source:TAIR;Acc:AT5G43060]	ath-miR396a,ath-miR396b
ath-miR396a	-0.0525413	0.027627	-0.326317	-0.735965	AT1G63880	0.488236	0.131996	0.696159	0.945808	AT1G63880	Disease resistance protein (TIR-NBS-LRR class) family [Source:TAIR;Acc:AT1G63880]	ath-miR396a,ath-miR396b
ath-miR396a	-0.0525413	0.027627	-0.326317	-0.735965	AT3G14110	0.351328	0.160948	0.419298	0.471171	FLU	Tetratricopeptide repeat (TPR)-like superfamily protein [Source:TAIR;Acc:AT3G14110]	ath-miR396a,ath-miR396b
ath-miR396a	-0.0525413	0.027627	-0.326317	-0.735965	AT2G22840	0.396286	0.121128	0.608217	0.606562	AtGRF1	growth-regulating factor 1 [Source:TAIR;Acc:AT2G22840]	ath-miR396a,ath-miR396b
ath-miR396a	-0.0525413	0.027627	-0.326317	-0.735965	AT3G19400	0.487001	0.301811	-0.0860983	0.296915	AT3G19400	Cysteine proteinases superfamily protein [Source:TAIR;Acc:AT3G19400]	ath-miR396a,ath-miR396b
ath-miR396a	-0.0525413	0.027627	-0.326317	-0.735965	AT2G45480	0.517528	0.445492	0.377741	0.510793	AtGRF9	growth-regulating factor 9 [Source:TAIR;Acc:AT2G45480]	ath-miR396a,ath-miR396b
ath-miR396a	-0.0525413	0.027627	-0.326317	-0.735965	AT5G24660	-0.687461	-0.897722	-3.31675	-3.04317	LSU2	response to low sulfur 2 [Source:TAIR;Acc:AT5G24660]	ath-miR396a,ath-miR396b
ath-miR396a	-0.0525413	0.027627	-0.326317	-0.735965	AT1G08290	-0.0165253	-0.051333	-0.84235	-0.899535	WIP3	WIP domain protein 3 [Source:TAIR;Acc:AT1G08290]	ath-miR396a
ath-miR396a	-0.0525413	0.027627	-0.326317	-0.735965	AT2G38010	0.0388975	0.237372	-0.863159	-0.973579	AT2G38010	Neutral/alkaline non-lysosomal ceramidase [Source:TAIR;Acc:AT2G38010]	ath-miR396a
ath-miR396b	-0.0515709	0.0243649	-0.325778	-0.737394	AT2G36400	0.963189	0.675902	1.09768	1.29983	AtGRF3	growth-regulating factor 3 [Source:TAIR;Acc:AT2G36400]	ath-miR396a,ath-miR396b
ath-miR396b	-0.0515709	0.0243649	-0.325778	-0.737394	AT4G24150	-0.153553	-0.322677	0.707273	0.588293	AtGRF8	growth-regulating factor 8 [Source:TAIR;Acc:AT4G24150]	ath-miR396a,ath-miR396b
ath-miR396b	-0.0515709	0.0243649	-0.325778	-0.737394	AT1G75295	0.0392066	0.0904009	0.654689	0.606187	AT1G75295	other RNA [Source:TAIR;Acc:AT1G75295]	ath-miR396a,ath-miR396b
ath-miR396b	-0.0515709	0.0243649	-0.325778	-0.737394	AT1G80060	-0.178244	-0.118408	0.587311	0.608392	AT1G80060	Ubiquitin-like superfamily protein [Source:TAIR;Acc:AT1G80060]	ath-miR396a,ath-miR396b
ath-miR396b	-0.0515709	0.0243649	-0.325778	-0.737394	AT4G07410	-0.0994055	-0.103518	0.53153	0.512464	AT4G07410	Transducin family protein / WD-40 repeat family protein [Source:TAIR;Acc:AT4G07410]	ath-miR396b
ath-miR396b	-0.0515709	0.0243649	-0.325778	-0.737394	AT1G60140	-0.159273	-0.223279	1.20005	0.956729	ATTPS10	trehalose phosphate synthase [Source:TAIR;Acc:AT1G60140]	ath-miR396a,ath-miR396b
ath-miR396b	-0.0515709	0.0243649	-0.325778	-0.737394	AT5G53660	1.44344	1.20414	0.876895	0.619159	AtGRF7	growth-regulating factor 7 [Source:TAIR;Acc:AT5G53660]	ath-miR396a,ath-miR396b
ath-miR396b	-0.0515709	0.0243649	-0.325778	-0.737394	AT3G52910	-0.269759	0.146606	0.128043	0.39342	AtGRF4	growth-regulating factor 4 [Source:TAIR;Acc:AT3G52910]	ath-miR396a,ath-miR396b
ath-miR396b	-0.0515709	0.0243649	-0.325778	-0.737394	AT3G07060	0.259734	0.0126268	0.283102	0.296655	emb1974	NHL domain-containing protein [Source:TAIR;Acc:AT3G07060]	ath-miR396b
ath-miR396b	-0.0515709	0.0243649	-0.325778	-0.737394	AT2G04270	0.187181	0.085046	0.373317	0.311764	RNEE/G	RNAse E/G-like [Source:TAIR;Acc:AT2G04270]	ath-miR396a,ath-miR396b
ath-miR396b	-0.0515709	0.0243649	-0.325778	-0.737394	AT5G43060	0.368346	-0.0105902	0.217912	0.493819	AT5G43060	Granulin repeat cysteine protease family protein [Source:TAIR;Acc:AT5G43060]	ath-miR396a,ath-miR396b
ath-miR396b	-0.0515709	0.0243649	-0.325778	-0.737394	AT1G63880	0.488236	0.131996	0.696159	0.945808	AT1G63880	Disease resistance protein (TIR-NBS-LRR class) family [Source:TAIR;Acc:AT1G63880]	ath-miR396a,ath-miR396b
ath-miR396b	-0.0515709	0.0243649	-0.325778	-0.737394	AT3G14110	0.351328	0.160948	0.419298	0.471171	FLU	Tetratricopeptide repeat (TPR)-like superfamily protein [Source:TAIR;Acc:AT3G14110]	ath-miR396a,ath-miR396b
ath-miR396b	-0.0515709	0.0243649	-0.325778	-0.737394	AT2G22840	0.396286	0.121128	0.608217	0.606562	AtGRF1	growth-regulating factor 1 [Source:TAIR;Acc:AT2G22840]	ath-miR396a,ath-miR396b
ath-miR396b	-0.0515709	0.0243649	-0.325778	-0.737394	AT5G65070	0.438029	0.150615	0.598094	0.601143	MAF4	K-box region and MADS-box transcription factor family protein [Source:TAIR;Acc:AT5G65070]	ath-miR396b
ath-miR396b	-0.0515709	0.0243649	-0.325778	-0.737394	AT3G19400	0.487001	0.301811	-0.0860983	0.296915	AT3G19400	Cysteine proteinases superfamily protein [Source:TAIR;Acc:AT3G19400]	ath-miR396a,ath-miR396b
ath-miR396b	-0.0515709	0.0243649	-0.325778	-0.737394	AT2G45480	0.517528	0.445492	0.377741	0.510793	AtGRF9	growth-regulating factor 9 [Source:TAIR;Acc:AT2G45480]	ath-miR396a,ath-miR396b
ath-miR396b	-0.0515709	0.0243649	-0.325778	-0.737394	AT5G24660	-0.687461	-0.897722	-3.31675	-3.04317	LSU2	response to low sulfur 2 [Source:TAIR;Acc:AT5G24660]	ath-miR396a,ath-miR396b
ath-miR396b	-0.0515709	0.0243649	-0.325778	-0.737394	AT1G24580	-1.73083	-0.591924	-1.15117	-2.37407	AT1G24580	RING/U-box superfamily protein [Source:TAIR;Acc:AT1G24580]	ath-miR396b
ath-miR396b	-0.0515709	0.0243649	-0.325778	-0.737394	AT5G05180	-0.0644564	-0.122092	-0.331872	-0.277284	AT5G05180	unknown protein; BEST Arabidopsis thaliana protein match is: unknown protein (TAIR:AT3G10880.1); Has 1807 Blast hits to 1807 proteins in 277 species: Archae - 0; Bacteria - 0; Metazoa - 736; Fungi - 347; Plants - 385; Viruses - 0; Other Eukaryotes - /.../source: NCBI BLink). [Source:TAIR;Acc:AT5G05180]	ath-miR396b
ath-miR403	-0.357738	-0.931491	-0.481559	-0.645687	AT5G02760	0.659655	0.0333455	0.23759	1.46517	AT5G02760	Protein phosphatase 2C family protein [Source:TAIR;Acc:AT5G02760]	ath-miR403
ath-miR403	-0.357738	-0.931491	-0.481559	-0.645687	AT5G65210	-0.32261	-0.300199	0.64858	0.607471	TGA1	bZIP transcription factor family protein [Source:TAIR;Acc:AT5G65210]	ath-miR403
ath-miR403	-0.357738	-0.931491	-0.481559	-0.645687	AT2G19250	0.0394899	0.00300475	0.697606	0.647054	AT2G19250	pseudogene, similar to Magnesium-chelatase subunit chlD, chloroplast precursor (Mg- protoporphyrin IX chelatase) (Mg-chelatase subunit D). (Common tobacco), similar to SP [Source:TAIR;Acc:AT2G19250]	ath-miR403
ath-miR403	-0.357738	-0.931491	-0.481559	-0.645687	AT1G21670	-0.582366	-0.221494	0.813119	0.711111	AT1G21670	LOCATED IN: cell wall, plant-type cell wall; EXPRESSED IN: 23 plant structures; EXPRESSED DURING: 14 growth stages; CONTAINS InterPro DOMAIN/s: WD40-like Beta Propeller (InterPro:IPR011659), Six-bladed beta-propeller, TolB-like (InterPro:IPR011042); /.../Arabidopsis thaliana protein match is: DPP6 N-terminal domain-like protein (TAIR:AT1G21680.1); Has 8461 Blast hits to 5060 proteins in 1257 spec…	ath-miR403
ath-miR403	-0.357738	-0.931491	-0.481559	-0.645687	AT5G23980	-0.233997	-0.00854468	1.22908	1.34918	ATFRO4	ferric reduction oxidase 4 [Source:TAIR;Acc:AT5G23980]	ath-miR403
ath-miR403	-0.357738	-0.931491	-0.481559	-0.645687	AT1G53210	0.0461384	0.0292445	0.234599	0.427385	AT1G53210	sodium/calcium exchanger family protein / calcium-binding EF hand family protein [Source:TAIR;Acc:AT1G53210]	ath-miR403
ath-miR403	-0.357738	-0.931491	-0.481559	-0.645687	AT1G03060	-0.0281935	-0.0555189	0.276823	0.269315	SPI	Beige/BEACH domain ;WD domain, G-beta repeat protein [Source:TAIR;Acc:AT1G03060]	ath-miR403
ath-miR403	-0.357738	-0.931491	-0.481559	-0.645687	AT1G11820	0.405923	0.232806	0.250504	0.400376	AT1G11820	O-Glycosyl hydrolases family 17 protein [Source:TAIR;Acc:AT1G11820]	ath-miR403
ath-miR403	-0.357738	-0.931491	-0.481559	-0.645687	AT4G01030	0.426641	0.162949	0.232484	0.613743	PCMP-H65	pentatricopeptide (PPR) repeat-containing protein [Source:TAIR;Acc:AT4G01030]	ath-miR403
ath-miR403	-0.357738	-0.931491	-0.481559	-0.645687	AT1G65370	0.328666	0.287638	0.461791	0.370844	AT1G65370	TRAF-like family protein [Source:TAIR;Acc:AT1G65370]	ath-miR403
ath-miR403	-0.357738	-0.931491	-0.481559	-0.645687	AT4G02770	0.774026	0.479275	0.169415	0.131282	PSAD-1	photosystem I subunit D-1 [Source:TAIR;Acc:AT4G02770]	ath-miR403
ath-miR403	-0.357738	-0.931491	-0.481559	-0.645687	AT1G29200	-1.19431	-0.666215	-0.939544	-1.27062	AT1G29200	O-fucosyltransferase family protein [Source:TAIR;Acc:AT1G29200]	ath-miR403
ath-miR403	-0.357738	-0.931491	-0.481559	-0.645687	AT5G54130	-1.28584	-0.701051	-0.822352	-0.774913	AT5G54130	Calcium-binding endonuclease/exonuclease/phosphatase family [Source:TAIR;Acc:AT5G54130]	ath-miR403
ath-miR403	-0.357738	-0.931491	-0.481559	-0.645687	AT3G22250	-1.54079	-0.972172	-1.14266	-0.529934	UGT82A1	UDP-Glycosyltransferase superfamily protein [Source:TAIR;Acc:AT3G22250]	ath-miR403
ath-miR403	-0.357738	-0.931491	-0.481559	-0.645687	AT1G03180	0.0449311	-0.12451	-0.231525	-0.435823	AT1G03180	unknown protein; Has 36 Blast hits to 36 proteins in 15 species: Archae - 0; Bacteria - 0; Metazoa - 3; Fungi - 0; Plants - 33; Viruses - 0; Other Eukaryotes - 0 (source: NCBI BLink). [Source:TAIR;Acc:AT1G03180]	ath-miR403
ath-miR403	-0.357738	-0.931491	-0.481559	-0.645687	AT1G69526	-0.16406	0.0402085	-1.08757	-1.08111	AT1G69526	S-adenosyl-L-methionine-dependent methyltransferases superfamily protein [Source:TAIR;Acc:AT1G69526]	ath-miR403
ath-miR403	-0.357738	-0.931491	-0.481559	-0.645687	AT1G69520	0.223506	0.0597157	-0.70681	-0.50323	AT1G69520	S-adenosyl-L-methionine-dependent methyltransferases superfamily protein [Source:TAIR;Acc:AT1G69520]	ath-miR403
ath-miR403	-0.357738	-0.931491	-0.481559	-0.645687	AT1G63650	0.711371	0.543401	-0.129598	0.00541521	EGL3	basic helix-loop-helix (bHLH) DNA-binding superfamily protein [Source:TAIR;Acc:AT1G63650]	ath-miR403
ath-miR866_3p	-0.998134	-0.48304	-0.915023	-0.499565	AT1G66520	0.326155	0.162409	0.105279	0.034975	pde194	formyltransferase, putative [Source:TAIR;Acc:AT1G66520]	ath-miR866_3p
ath-miR866_3p	-0.998134	-0.48304	-0.915023	-0.499565	AT4G04970	0.304543	0.190611	0.0208374	0.0518752	ATGSL1	glucan synthase-like 1 [Source:TAIR;Acc:AT4G04970]	ath-miR866_3p
ath-miR866_3p	-0.998134	-0.48304	-0.915023	-0.499565	AT3G57730	0.500839	0.366905	0.144131	0.355566	AT3G57730	Protein kinase superfamily protein [Source:TAIR;Acc:AT3G57730]	ath-miR866_3p
ath-miR866_3p	-0.998134	-0.48304	-0.915023	-0.499565	AT4G35840	0.537164	0.508628	0.0970473	0.352115	AT4G35840	RING/U-box superfamily protein [Source:TAIR;Acc:AT4G35840]	ath-miR866_3p
ath-miR866_3p	-0.998134	-0.48304	-0.915023	-0.499565	AT1G25240	-1.02949	-0.756215	-0.698577	-0.470526	AT1G25240	ENTH/VHS/GAT family protein [Source:TAIR;Acc:AT1G25240]	ath-miR866_3p
ath-miR866_3p	-0.998134	-0.48304	-0.915023	-0.499565	AT4G32180	-0.267446	-0.192456	-0.167022	-0.0503129	ATPANK2	pantothenate kinase 2 [Source:TAIR;Acc:AT4G32180]	ath-miR866_3p
ath-miR866_3p	-0.998134	-0.48304	-0.915023	-0.499565	AT2G43900	-0.420158	-0.357414	0.0872455	-0.218324	5PTASE12	Endonuclease/exonuclease/phosphatase family protein [Source:TAIR;Acc:AT2G43900]	ath-miR866_3p
ath-miR866_3p	-0.998134	-0.48304	-0.915023	-0.499565	AT5G47180	-0.383401	-0.458685	-0.145083	-0.0968646	PVA21	Plant VAMP (vesicle-associated membrane protein) family protein [Source:TAIR;Acc:AT5G47180]	ath-miR866_3p
ath-miR866_3p	-0.998134	-0.48304	-0.915023	-0.499565	AT2G41540	-0.749067	-0.39344	-0.833901	-0.423234	GPDHC1	6-phosphogluconate dehydrogenase family protein [Source:TAIR;Acc:AT2G41540]	ath-miR866_3p
ath-miR866_3p	-0.998134	-0.48304	-0.915023	-0.499565	AT4G14960	0.277747	0.197416	-0.423793	-0.36684	TUA6	Tubulin/FtsZ family protein [Source:TAIR;Acc:AT4G14960]	ath-miR866_3p
ath-miR866_3p	-0.998134	-0.48304	-0.915023	-0.499565	AT4G39740	0.585276	0.235783	-0.154801	-0.128558	HCC2	Thioredoxin superfamily protein [Source:TAIR;Acc:AT4G39740]	ath-miR866_3p
ath-miR172a	-1.06528	-0.777413	-0.66042	-0.383683	AT4G24630	-0.483864	-0.487598	0.165762	0.216932	AT4G24630	DHHC-type zinc finger family protein [Source:TAIR;Acc:AT4G24630]	ath-miR172a,ath-miR172b_3p,ath-miR172c,ath-miR172d
ath-miR172a	-1.06528	-0.777413	-0.66042	-0.383683	AT1G33400	0.248962	0.091026	0.401885	0.472347	TPR9	Tetratricopeptide repeat (TPR)-like superfamily protein [Source:TAIR;Acc:AT1G33400]	ath-miR172a,ath-miR172b_3p,ath-miR172c,ath-miR172d
ath-miR172a	-1.06528	-0.777413	-0.66042	-0.383683	AT5G60120	0.343015	0.32011	0.213367	0.191928	TOE2	target of early activation tagged (EAT) 2 [Source:TAIR;Acc:AT5G60120]	ath-miR172a,ath-miR172b_3p,ath-miR172c,ath-miR172d,ath-miR172e
ath-miR172a	-1.06528	-0.777413	-0.66042	-0.383683	AT2G45720	0.281	0.459005	-0.080697	0.122549	AT2G45720	ARM repeat superfamily protein [Source:TAIR;Acc:AT2G45720]	ath-miR172a,ath-miR172b_3p
ath-miR172a	-1.06528	-0.777413	-0.66042	-0.383683	AT2G46920	0.197248	0.187322	-0.0186043	0.0282292	POL	Protein phosphatase 2C family protein [Source:TAIR;Acc:AT2G46920]	ath-miR172a,ath-miR172b_3p,ath-miR172c,ath-miR172d
ath-miR172a	-1.06528	-0.777413	-0.66042	-0.383683	AT2G39250	-1.2106	-0.400669	-1.04324	-1.03881	SNZ	Integrase-type DNA-binding superfamily protein [Source:TAIR;Acc:AT2G39250]	ath-miR172a,ath-miR172b_3p,ath-miR172c,ath-miR172d,ath-miR172e
ath-miR172a	-1.06528	-0.777413	-0.66042	-0.383683	AT4G37030	-0.826586	-0.492748	0.152212	0.0243291	AT4G37030	unknown protein; FUNCTIONS IN: molecular_function unknown; INVOLVED IN: biological_process unknown; LOCATED IN: endomembrane system; BEST Arabidopsis thaliana protein match is: unknown protein (TAIR:AT4G12680.1); Has 101 Blast hits to 99 proteins in /.../ecies: Archae - 0; Bacteria - 0; Metazoa - 0; Fungi - 0; Plants - 101; Viruses - 0; Other Eukaryotes - 0 (source: NCBI BLink). [Source:TAIR;Acc:…	ath-miR172a,ath-miR172b_3p,ath-miR172c,ath-miR172d,ath-miR408
ath-miR172a	-1.06528	-0.777413	-0.66042	-0.383683	AT3G14770	-0.503213	-0.324771	-0.626085	-0.532499	SWEET2	Nodulin MtN3 family protein [Source:TAIR;Acc:AT3G14770]	ath-miR172a,ath-miR172b_3p,ath-miR172c,ath-miR172d,ath-miR172e
ath-miR172a	-1.06528	-0.777413	-0.66042	-0.383683	AT4G36920	0.203515	0.324505	-0.466291	-0.0828557	AP2	Integrase-type DNA-binding superfamily protein [Source:TAIR;Acc:AT4G36920]	ath-miR172a,ath-miR172b_3p,ath-miR172c,ath-miR172d,ath-miR172e
ath-miR172a	-1.06528	-0.777413	-0.66042	-0.383683	AT5G65790	1.11936	0.539007	-0.31512	-0.0902086	ATMYB68	myb domain protein 68 [Source:TAIR;Acc:AT5G65790]	ath-miR172a,ath-miR172b_3p,ath-miR172c,ath-miR172d,ath-miR172e
ath-miR172a	-1.06528	-0.777413	-0.66042	-0.383683	AT3G07770	0.620769	0.224038	-0.21373	-0.404485	Hsp89.1	HEAT SHOCK PROTEIN 89.1 [Source:TAIR;Acc:AT3G07770]	ath-miR172a,ath-miR172b_3p
ath-miR172b_3p	-1.06528	-0.777413	-0.66042	-0.383683	AT4G24630	-0.483864	-0.487598	0.165762	0.216932	AT4G24630	DHHC-type zinc finger family protein [Source:TAIR;Acc:AT4G24630]	ath-miR172a,ath-miR172b_3p,ath-miR172c,ath-miR172d
ath-miR172b_3p	-1.06528	-0.777413	-0.66042	-0.383683	AT1G33400	0.248962	0.091026	0.401885	0.472347	TPR9	Tetratricopeptide repeat (TPR)-like superfamily protein [Source:TAIR;Acc:AT1G33400]	ath-miR172a,ath-miR172b_3p,ath-miR172c,ath-miR172d
ath-miR172b_3p	-1.06528	-0.777413	-0.66042	-0.383683	AT5G60120	0.343015	0.32011	0.213367	0.191928	TOE2	target of early activation tagged (EAT) 2 [Source:TAIR;Acc:AT5G60120]	ath-miR172a,ath-miR172b_3p,ath-miR172c,ath-miR172d,ath-miR172e
ath-miR172b_3p	-1.06528	-0.777413	-0.66042	-0.383683	AT2G45720	0.281	0.459005	-0.080697	0.122549	AT2G45720	ARM repeat superfamily protein [Source:TAIR;Acc:AT2G45720]	ath-miR172a,ath-miR172b_3p
ath-miR172b_3p	-1.06528	-0.777413	-0.66042	-0.383683	AT2G46920	0.197248	0.187322	-0.0186043	0.0282292	POL	Protein phosphatase 2C family protein [Source:TAIR;Acc:AT2G46920]	ath-miR172a,ath-miR172b_3p,ath-miR172c,ath-miR172d
ath-miR172b_3p	-1.06528	-0.777413	-0.66042	-0.383683	AT2G39250	-1.2106	-0.400669	-1.04324	-1.03881	SNZ	Integrase-type DNA-binding superfamily protein [Source:TAIR;Acc:AT2G39250]	ath-miR172a,ath-miR172b_3p,ath-miR172c,ath-miR172d,ath-miR172e
ath-miR172b_3p	-1.06528	-0.777413	-0.66042	-0.383683	AT4G37030	-0.826586	-0.492748	0.152212	0.0243291	AT4G37030	unknown protein; FUNCTIONS IN: molecular_function unknown; INVOLVED IN: biological_process unknown; LOCATED IN: endomembrane system; BEST Arabidopsis thaliana protein match is: unknown protein (TAIR:AT4G12680.1); Has 101 Blast hits to 99 proteins in /.../ecies: Archae - 0; Bacteria - 0; Metazoa - 0; Fungi - 0; Plants - 101; Viruses - 0; Other Eukaryotes - 0 (source: NCBI BLink). [Source:TAIR;Acc:…	ath-miR172a,ath-miR172b_3p,ath-miR172c,ath-miR172d,ath-miR408
ath-miR172b_3p	-1.06528	-0.777413	-0.66042	-0.383683	AT3G14770	-0.503213	-0.324771	-0.626085	-0.532499	SWEET2	Nodulin MtN3 family protein [Source:TAIR;Acc:AT3G14770]	ath-miR172a,ath-miR172b_3p,ath-miR172c,ath-miR172d,ath-miR172e
ath-miR172b_3p	-1.06528	-0.777413	-0.66042	-0.383683	AT4G36920	0.203515	0.324505	-0.466291	-0.0828557	AP2	Integrase-type DNA-binding superfamily protein [Source:TAIR;Acc:AT4G36920]	ath-miR172a,ath-miR172b_3p,ath-miR172c,ath-miR172d,ath-miR172e
ath-miR172b_3p	-1.06528	-0.777413	-0.66042	-0.383683	AT5G65790	1.11936	0.539007	-0.31512	-0.0902086	ATMYB68	myb domain protein 68 [Source:TAIR;Acc:AT5G65790]	ath-miR172a,ath-miR172b_3p,ath-miR172c,ath-miR172d,ath-miR172e
ath-miR172b_3p	-1.06528	-0.777413	-0.66042	-0.383683	AT3G07770	0.620769	0.224038	-0.21373	-0.404485	Hsp89.1	HEAT SHOCK PROTEIN 89.1 [Source:TAIR;Acc:AT3G07770]	ath-miR172a,ath-miR172b_3p
ath-miR172c	-1.06476	-0.776765	-0.673381	-0.382969	AT4G24630	-0.483864	-0.487598	0.165762	0.216932	AT4G24630	DHHC-type zinc finger family protein [Source:TAIR;Acc:AT4G24630]	ath-miR172a,ath-miR172b_3p,ath-miR172c,ath-miR172d
ath-miR172c	-1.06476	-0.776765	-0.673381	-0.382969	AT1G33400	0.248962	0.091026	0.401885	0.472347	TPR9	Tetratricopeptide repeat (TPR)-like superfamily protein [Source:TAIR;Acc:AT1G33400]	ath-miR172a,ath-miR172b_3p,ath-miR172c,ath-miR172d
ath-miR172c	-1.06476	-0.776765	-0.673381	-0.382969	AT5G60120	0.343015	0.32011	0.213367	0.191928	TOE2	target of early activation tagged (EAT) 2 [Source:TAIR;Acc:AT5G60120]	ath-miR172a,ath-miR172b_3p,ath-miR172c,ath-miR172d,ath-miR172e
ath-miR172c	-1.06476	-0.776765	-0.673381	-0.382969	AT2G46920	0.197248	0.187322	-0.0186043	0.0282292	POL	Protein phosphatase 2C family protein [Source:TAIR;Acc:AT2G46920]	ath-miR172a,ath-miR172b_3p,ath-miR172c,ath-miR172d
ath-miR172c	-1.06476	-0.776765	-0.673381	-0.382969	AT5G16000	0.328109	0.178431	0.32613	0.585713	NIK1	NSP-interacting kinase 1 [Source:TAIR;Acc:AT5G16000]	ath-miR172c,ath-miR172d
ath-miR172c	-1.06476	-0.776765	-0.673381	-0.382969	AT2G39250	-1.2106	-0.400669	-1.04324	-1.03881	SNZ	Integrase-type DNA-binding superfamily protein [Source:TAIR;Acc:AT2G39250]	ath-miR172a,ath-miR172b_3p,ath-miR172c,ath-miR172d,ath-miR172e
ath-miR172c	-1.06476	-0.776765	-0.673381	-0.382969	AT4G37030	-0.826586	-0.492748	0.152212	0.0243291	AT4G37030	unknown protein; FUNCTIONS IN: molecular_function unknown; INVOLVED IN: biological_process unknown; LOCATED IN: endomembrane system; BEST Arabidopsis thaliana protein match is: unknown protein (TAIR:AT4G12680.1); Has 101 Blast hits to 99 proteins in /.../ecies: Archae - 0; Bacteria - 0; Metazoa - 0; Fungi - 0; Plants - 101; Viruses - 0; Other Eukaryotes - 0 (source: NCBI BLink). [Source:TAIR;Acc:…	ath-miR172a,ath-miR172b_3p,ath-miR172c,ath-miR172d,ath-miR408
ath-miR172c	-1.06476	-0.776765	-0.673381	-0.382969	AT3G14770	-0.503213	-0.324771	-0.626085	-0.532499	SWEET2	Nodulin MtN3 family protein [Source:TAIR;Acc:AT3G14770]	ath-miR172a,ath-miR172b_3p,ath-miR172c,ath-miR172d,ath-miR172e
ath-miR172c	-1.06476	-0.776765	-0.673381	-0.382969	AT4G36920	0.203515	0.324505	-0.466291	-0.0828557	AP2	Integrase-type DNA-binding superfamily protein [Source:TAIR;Acc:AT4G36920]	ath-miR172a,ath-miR172b_3p,ath-miR172c,ath-miR172d,ath-miR172e
ath-miR172c	-1.06476	-0.776765	-0.673381	-0.382969	AT5G65790	1.11936	0.539007	-0.31512	-0.0902086	ATMYB68	myb domain protein 68 [Source:TAIR;Acc:AT5G65790]	ath-miR172a,ath-miR172b_3p,ath-miR172c,ath-miR172d,ath-miR172e
ath-miR172c	-1.06476	-0.776765	-0.673381	-0.382969	AT4G22830	0.518878	0.267317	-0.060643	-0.0662131	AT4G22830	unknown protein; FUNCTIONS IN: molecular_function unknown; INVOLVED IN: biological_process unknown; LOCATED IN: chloroplast; EXPRESSED IN: 20 plant structures; EXPRESSED DURING: 13 growth stages; CONTAINS InterPro DOMAIN/s: Protein of unknown functi /.../2499 (InterPro:IPR019634); Has 319 Blast hits to 317 proteins in 103 species: Archae - 0; Bacteria - 147; Metazoa - 0; Fungi - 0; Plants - 64; V…	ath-miR172c,ath-miR172d
ath-miR172d	-1.06476	-0.776765	-0.673381	-0.382969	AT4G24630	-0.483864	-0.487598	0.165762	0.216932	AT4G24630	DHHC-type zinc finger family protein [Source:TAIR;Acc:AT4G24630]	ath-miR172a,ath-miR172b_3p,ath-miR172c,ath-miR172d
ath-miR172d	-1.06476	-0.776765	-0.673381	-0.382969	AT1G33400	0.248962	0.091026	0.401885	0.472347	TPR9	Tetratricopeptide repeat (TPR)-like superfamily protein [Source:TAIR;Acc:AT1G33400]	ath-miR172a,ath-miR172b_3p,ath-miR172c,ath-miR172d
ath-miR172d	-1.06476	-0.776765	-0.673381	-0.382969	AT1G66730	-0.0682015	-0.0967265	0.446291	0.352575	AtLIG6	DNA LIGASE 6 [Source:TAIR;Acc:AT1G66730]	ath-miR172d,ath-miR391
ath-miR172d	-1.06476	-0.776765	-0.673381	-0.382969	AT1G11440	0.332593	0.449151	0.134705	0.139337	AT1G11440	BEST Arabidopsis thaliana protein match is: glycine-rich protein (TAIR:AT3G29075.1); Has 19337 Blast hits to 8589 proteins in 488 species: Archae - 26; Bacteria - 641; Metazoa - 7852; Fungi - 2167; Plants - 955; Viruses - 616; Other Eukaryotes - 708 /.../rce: NCBI BLink). [Source:TAIR;Acc:AT1G11440]	ath-miR172d
ath-miR172d	-1.06476	-0.776765	-0.673381	-0.382969	AT5G60120	0.343015	0.32011	0.213367	0.191928	TOE2	target of early activation tagged (EAT) 2 [Source:TAIR;Acc:AT5G60120]	ath-miR172a,ath-miR172b_3p,ath-miR172c,ath-miR172d,ath-miR172e
ath-miR172d	-1.06476	-0.776765	-0.673381	-0.382969	AT3G43210	0.366243	0.258944	0.0570661	-0.0197416	TES	ATP binding microtubule motor family protein [Source:TAIR;Acc:AT3G43210]	ath-miR172d
ath-miR172d	-1.06476	-0.776765	-0.673381	-0.382969	AT2G46920	0.197248	0.187322	-0.0186043	0.0282292	POL	Protein phosphatase 2C family protein [Source:TAIR;Acc:AT2G46920]	ath-miR172a,ath-miR172b_3p,ath-miR172c,ath-miR172d
ath-miR172d	-1.06476	-0.776765	-0.673381	-0.382969	AT3G05050	0.22663	0.17801	-0.0116102	0.0372701	AT3G05050	Protein kinase superfamily protein [Source:TAIR;Acc:AT3G05050]	ath-miR172d
ath-miR172d	-1.06476	-0.776765	-0.673381	-0.382969	AT5G16000	0.328109	0.178431	0.32613	0.585713	NIK1	NSP-interacting kinase 1 [Source:TAIR;Acc:AT5G16000]	ath-miR172c,ath-miR172d
ath-miR172d	-1.06476	-0.776765	-0.673381	-0.382969	AT1G20080	-1.49755	-0.555784	-0.45542	-1.10514	SYTB	Calcium-dependent lipid-binding (CaLB domain) family protein [Source:TAIR;Acc:AT1G20080]	ath-miR172d
ath-miR172d	-1.06476	-0.776765	-0.673381	-0.382969	AT2G39250	-1.2106	-0.400669	-1.04324	-1.03881	SNZ	Integrase-type DNA-binding superfamily protein [Source:TAIR;Acc:AT2G39250]	ath-miR172a,ath-miR172b_3p,ath-miR172c,ath-miR172d,ath-miR172e
ath-miR172d	-1.06476	-0.776765	-0.673381	-0.382969	AT1G70780	-0.588739	-0.177108	-0.262987	-0.00784758	AT1G70780	unknown protein; FUNCTIONS IN: molecular_function unknown; INVOLVED IN: biological_process unknown; LOCATED IN: mitochondrion; EXPRESSED IN: sperm cell, male gametophyte, pollen tube; EXPRESSED DURING: L mature pollen stage, M germinated pollen stag /.../T Arabidopsis thaliana protein match is: unknown protein (TAIR:AT1G23150.1); Has 143 Blast hits to 143 proteins in 17 species: Archae - 0; Bacte…	ath-miR172d
ath-miR172d	-1.06476	-0.776765	-0.673381	-0.382969	AT4G13500	-0.634785	0.00623647	-0.158847	-0.0139573	AT4G13500	unknown protein; FUNCTIONS IN: molecular_function unknown; INVOLVED IN: biological_process unknown; LOCATED IN: chloroplast; BEST Arabidopsis thaliana protein match is: unknown protein (TAIR:AT2G05310.1); Has 50 Blast hits to 50 proteins in 20 speci /.../chae - 0; Bacteria - 0; Metazoa - 0; Fungi - 0; Plants - 50; Viruses - 0; Other Eukaryotes - 0 (source: NCBI BLink). [Source:TAIR;Acc:AT4G13500]	ath-miR172d
ath-miR172d	-1.06476	-0.776765	-0.673381	-0.382969	AT4G37030	-0.826586	-0.492748	0.152212	0.0243291	AT4G37030	unknown protein; FUNCTIONS IN: molecular_function unknown; INVOLVED IN: biological_process unknown; LOCATED IN: endomembrane system; BEST Arabidopsis thaliana protein match is: unknown protein (TAIR:AT4G12680.1); Has 101 Blast hits to 99 proteins in /.../ecies: Archae - 0; Bacteria - 0; Metazoa - 0; Fungi - 0; Plants - 101; Viruses - 0; Other Eukaryotes - 0 (source: NCBI BLink). [Source:TAIR;Acc:…	ath-miR172a,ath-miR172b_3p,ath-miR172c,ath-miR172d,ath-miR408
ath-miR172d	-1.06476	-0.776765	-0.673381	-0.382969	AT3G14770	-0.503213	-0.324771	-0.626085	-0.532499	SWEET2	Nodulin MtN3 family protein [Source:TAIR;Acc:AT3G14770]	ath-miR172a,ath-miR172b_3p,ath-miR172c,ath-miR172d,ath-miR172e
ath-miR172d	-1.06476	-0.776765	-0.673381	-0.382969	AT5G35180	-0.359873	-0.135702	-0.386915	-0.4836	AT5G35180	Protein of unknown function (DUF1336) [Source:TAIR;Acc:AT5G35180]	ath-miR172d
ath-miR172d	-1.06476	-0.776765	-0.673381	-0.382969	AT1G56450	0.138629	0.193086	-0.499192	-0.467151	PBG1	20S proteasome beta subunit G1 [Source:TAIR;Acc:AT1G56450]	ath-miR172d
ath-miR172d	-1.06476	-0.776765	-0.673381	-0.382969	AT4G36920	0.203515	0.324505	-0.466291	-0.0828557	AP2	Integrase-type DNA-binding superfamily protein [Source:TAIR;Acc:AT4G36920]	ath-miR172a,ath-miR172b_3p,ath-miR172c,ath-miR172d,ath-miR172e
ath-miR172d	-1.06476	-0.776765	-0.673381	-0.382969	AT5G65790	1.11936	0.539007	-0.31512	-0.0902086	ATMYB68	myb domain protein 68 [Source:TAIR;Acc:AT5G65790]	ath-miR172a,ath-miR172b_3p,ath-miR172c,ath-miR172d,ath-miR172e
ath-miR172d	-1.06476	-0.776765	-0.673381	-0.382969	AT1G52400	1.11728	0.673868	-0.064795	-0.120066	BGL1	beta glucosidase 18 [Source:TAIR;Acc:AT1G52400]	ath-miR172d
ath-miR172d	-1.06476	-0.776765	-0.673381	-0.382969	AT4G22830	0.518878	0.267317	-0.060643	-0.0662131	AT4G22830	unknown protein; FUNCTIONS IN: molecular_function unknown; INVOLVED IN: biological_process unknown; LOCATED IN: chloroplast; EXPRESSED IN: 20 plant structures; EXPRESSED DURING: 13 growth stages; CONTAINS InterPro DOMAIN/s: Protein of unknown functi /.../2499 (InterPro:IPR019634); Has 319 Blast hits to 317 proteins in 103 species: Archae - 0; Bacteria - 147; Metazoa - 0; Fungi - 0; Plants - 64; V…	ath-miR172c,ath-miR172d
ath-miR827	-1.40476	-1.39836	-0.975178	-1.03914	AT1G02860	0.283371	0.137907	1.10845	1.2929	NLA	SPX (SYG1/Pho81/XPR1) domain-containing protein [Source:TAIR;Acc:AT1G02860]	ath-miR827
ath-miR827	-1.40476	-1.39836	-0.975178	-1.03914	AT4G37590	0.123984	-0.015173	0.254147	0.284918	NPY5	Phototropic-responsive NPH3 family protein [Source:TAIR;Acc:AT4G37590]	ath-miR827
ath-miR827	-1.40476	-1.39836	-0.975178	-1.03914	AT5G60615	-1.09329	-0.76379	-0.520427	-0.319147	AT5G60615	Defensin-like (DEFL) family protein [Source:TAIR;Acc:AT5G60615]	ath-miR827
ath-miR827	-1.40476	-1.39836	-0.975178	-1.03914	AT4G01975	-0.378797	-0.389824	-0.674819	-0.0210219	AT4G01975	transposable element gene [Source:TAIR;Acc:AT4G01975]	ath-miR827
ath-miR827	-1.40476	-1.39836	-0.975178	-1.03914	AT2G16365	-0.734919	-0.649035	0.359173	0.355122	AT2G16365	F-box family protein [Source:TAIR;Acc:AT2G16365]	ath-miR827
ath-miR827	-1.40476	-1.39836	-0.975178	-1.03914	AT4G17550	-0.742783	-0.554378	-0.58993	-0.795628	AT4G17550	Major facilitator superfamily protein [Source:TAIR;Acc:AT4G17550]	ath-miR827
ath-miR827	-1.40476	-1.39836	-0.975178	-1.03914	AT4G00610	0.0328488	-0.343432	-0.287868	-0.781822	AT4G00610	DNA-binding storekeeper protein-related transcriptional regulator [Source:TAIR;Acc:AT4G00610]	ath-miR827
ath-miR172b_5p	-0.873324	-0.835312	-0.696433	-1.22638	AT4G10970	0.131341	0.0540074	0.19801	0.237306	AT4G10970	unknown protein; BEST Arabidopsis thaliana protein match is: unknown protein (TAIR:AT4G23910.2); Has 1807 Blast hits to 1807 proteins in 277 species: Archae - 0; Bacteria - 0; Metazoa - 736; Fungi - 347; Plants - 385; Viruses - 0; Other Eukaryotes - /.../source: NCBI BLink). [Source:TAIR;Acc:AT4G10970]	ath-miR172b_5p,ath-miR172e
ath-miR172b_5p	-0.873324	-0.835312	-0.696433	-1.22638	AT5G13690	0.213465	0.16242	0.593894	0.53791	CYL1	alpha-N-acetylglucosaminidase family / NAGLU family [Source:TAIR;Acc:AT5G13690]	ath-miR172b_5p,ath-miR172e
ath-miR172b_5p	-0.873324	-0.835312	-0.696433	-1.22638	AT2G04110	-0.374367	-0.18488	-0.377215	-0.532378	AT2G04110	pseudogene of unknown protein [Source:TAIR;Acc:AT2G04110]	ath-miR172b_5p,ath-miR172e
ath-miR172b_5p	-0.873324	-0.835312	-0.696433	-1.22638	AT2G16500	-0.442297	-0.309474	-0.372038	-0.624778	ADC1	arginine decarboxylase 1 [Source:TAIR;Acc:AT2G16500]	ath-miR172b_5p,ath-miR172e
ath-miR172b_5p	-0.873324	-0.835312	-0.696433	-1.22638	AT2G47830	-0.285988	-0.185888	-0.287278	-0.348724	MTPC1	Cation efflux family protein [Source:TAIR;Acc:AT2G47830]	ath-miR172b_5p,ath-miR172e
ath-miR172b_5p	-0.873324	-0.835312	-0.696433	-1.22638	AT3G61820	0.646803	0.469848	-0.852928	-0.679706	AT3G61820	Eukaryotic aspartyl protease family protein [Source:TAIR;Acc:AT3G61820]	ath-miR172b_5p,ath-miR172e
ath-miR172b_5p	-0.873324	-0.835312	-0.696433	-1.22638	AT5G65720	0.22134	0.136678	-0.175651	-0.0905323	ATNIFS1	nitrogen fixation S (NIFS)-like 1 [Source:TAIR;Acc:AT5G65720]	ath-miR172b_5p,ath-miR172e
ath-miR867	-1.20273	-0.619381	-1.00613	-1.33692	AT4G23840	-0.188461	-0.169472	0.706122	0.514302	AT4G23840	Leucine-rich repeat (LRR) family protein [Source:TAIR;Acc:AT4G23840]	ath-miR395a,ath-miR395d,ath-miR395e,ath-miR867
ath-miR867	-1.20273	-0.619381	-1.00613	-1.33692	AT2G39030	2.53162	0.221026	1.10609	0.898132	AT2G39030/T7F6.20	Acyl-CoA N-acyltransferases (NAT) superfamily protein [Source:TAIR;Acc:AT2G39030]	ath-miR867
ath-miR867	-1.20273	-0.619381	-1.00613	-1.33692	AT1G19430	0.339949	0.327673	-0.115454	-0.0971756	AT1G19430	S-adenosyl-L-methionine-dependent methyltransferases superfamily protein [Source:TAIR;Acc:AT1G19430]	ath-miR867
ath-miR867	-1.20273	-0.619381	-1.00613	-1.33692	AT3G17750	0.187349	0.155553	0.122702	0.141504	AT3G17750	Protein kinase superfamily protein [Source:TAIR;Acc:AT3G17750]	ath-miR867
ath-miR867	-1.20273	-0.619381	-1.00613	-1.33692	AT1G02660	-1.59427	-1.01693	0.558666	0.170767	AT1G02660	alpha/beta-Hydrolases superfamily protein [Source:TAIR;Acc:AT1G02660]	ath-miR867
ath-miR867	-1.20273	-0.619381	-1.00613	-1.33692	AT1G33110	-1.53322	-1.10826	-0.267033	-0.501727	AT1G33110	MATE efflux family protein [Source:TAIR;Acc:AT1G33110]	ath-miR867
ath-miR867	-1.20273	-0.619381	-1.00613	-1.33692	AT3G27270	-0.261777	0.239012	-0.896658	-1.12243	AT3G27270	TRAM, LAG1 and CLN8 (TLC) lipid-sensing domain containing protein [Source:TAIR;Acc:AT3G27270]	ath-miR867
ath-miR867	-1.20273	-0.619381	-1.00613	-1.33692	AT5G26000	0.174139	0.105289	-0.533382	-0.323185	TGG1	thioglucoside glucohydrolase 1 [Source:TAIR;Acc:AT5G26000]	ath-miR867
ath-miR447a_3p	-1.03786	-0.800166	-1.1488	-1.54897	AT4G15735	-0.109566	-0.0625276	0.300145	1.94853	SCRL10	SCR-like 10 [Source:TAIR;Acc:AT4G15735]	ath-miR447a_3p,ath-miR447b
ath-miR447a_3p	-1.03786	-0.800166	-1.1488	-1.54897	AT5G16030	0.49281	0.407555	1.00628	1.44056	AT5G16030	unknown protein; BEST Arabidopsis thaliana protein match is: unknown protein (TAIR:AT3G02500.1); Has 30201 Blast hits to 17322 proteins in 780 species: Archae - 12; Bacteria - 1396; Metazoa - 17338; Fungi - 3422; Plants - 5037; Viruses - 0; Other Eu /.../es - 2996 (source: NCBI BLink). [Source:TAIR;Acc:AT5G16030]	ath-miR447a_3p,ath-miR447b
ath-miR447a_3p	-1.03786	-0.800166	-1.1488	-1.54897	AT2G22650	0.112912	-0.00501736	0.479673	0.478742	AT2G22650	FAD-dependent oxidoreductase family protein [Source:TAIR;Acc:AT2G22650]	ath-miR447a_3p,ath-miR447b
ath-miR447a_3p	-1.03786	-0.800166	-1.1488	-1.54897	AT5G07890	-0.116303	-0.099235	0.387262	0.37457	AT5G07890	myosin heavy chain-related [Source:TAIR;Acc:AT5G07890]	ath-miR447a_3p,ath-miR447b
ath-miR447a_3p	-1.03786	-0.800166	-1.1488	-1.54897	AT1G68820	-0.161822	0.041529	0.21897	0.314822	AT1G68820	Transmembrane Fragile-X-F-associated protein [Source:TAIR;Acc:AT1G68820]	ath-miR447a_3p,ath-miR447b
ath-miR447a_3p	-1.03786	-0.800166	-1.1488	-1.54897	AT5G42870	-0.125409	-0.0026663	0.269658	0.39831	PAH2	phosphatidic acid phosphohydrolase 2 [Source:TAIR;Acc:AT5G42870]	ath-miR447a_3p,ath-miR447b
ath-miR447a_3p	-1.03786	-0.800166	-1.1488	-1.54897	AT1G79750	-0.0275946	-0.0222471	0.292628	0.283692	ATNADP-ME4	NADP-malic enzyme 4 [Source:TAIR;Acc:AT1G79750]	ath-miR447a_3p,ath-miR447b
ath-miR447a_3p	-1.03786	-0.800166	-1.1488	-1.54897	AT4G36860	0.413838	0.294118	0.171715	0.237898	DAR1	LIM domain-containing protein [Source:TAIR;Acc:AT4G36860]	ath-miR157a,ath-miR157b,ath-miR157c,ath-miR447a_3p,ath-miR447b
ath-miR447a_3p	-1.03786	-0.800166	-1.1488	-1.54897	AT2G40095	0.548403	-0.0333191	0.0296125	0.772647	AT2G40095	Alpha/beta hydrolase related protein [Source:TAIR;Acc:AT2G40095]	ath-miR447a_3p,ath-miR447b
ath-miR447a_3p	-1.03786	-0.800166	-1.1488	-1.54897	AT5G26210	0.361294	0.206926	0.48806	0.454486	AL4	alfin-like 4 [Source:TAIR;Acc:AT5G26210]	ath-miR447a_3p,ath-miR447b
ath-miR447a_3p	-1.03786	-0.800166	-1.1488	-1.54897	AT1G79270	-1.98848	-1.09868	-1.07947	-1.2959	ECT8	evolutionarily conserved C-terminal region 8 [Source:TAIR;Acc:AT1G79270]	ath-miR447a_3p,ath-miR447b
ath-miR447a_3p	-1.03786	-0.800166	-1.1488	-1.54897	AT3G21965	-1.23047	-0.397952	-0.497101	-1.24091	AT3G21965	pseudogene, similar to OJ1058_A12.21, contains Pfam profile: PF01657 Domain of unknown function; blastp match of 34% identity and 2.8e-22 P-value to GP [Source:TAIR;Acc:AT3G21965]	ath-miR447a_3p,ath-miR447b
ath-miR447a_3p	-1.03786	-0.800166	-1.1488	-1.54897	AT4G20780	-1.17274	-0.669694	-0.709382	-1.20513	CML42	calmodulin like 42 [Source:TAIR;Acc:AT4G20780]	ath-miR447a_3p,ath-miR447b
ath-miR447a_3p	-1.03786	-0.800166	-1.1488	-1.54897	AT5G54560	-1.41975	-0.856815	-0.842819	-0.675949	AT5G54560	Protein of unknown function (DUF295) [Source:TAIR;Acc:AT5G54560]	ath-miR447a_3p,ath-miR447b
ath-miR447a_3p	-1.03786	-0.800166	-1.1488	-1.54897	AT1G78440	-1.7228	-0.875135	0.0417937	-0.147221	ATGA2OX1	Arabidopsis thaliana gibberellin 2-oxidase 1 [Source:TAIR;Acc:AT1G78440]	ath-miR447a_3p,ath-miR447b
ath-miR447a_3p	-1.03786	-0.800166	-1.1488	-1.54897	AT3G50390	-0.883986	-0.744716	-0.35019	-0.574888	AT3G50390	Transducin/WD40 repeat-like superfamily protein [Source:TAIR;Acc:AT3G50390]	ath-miR447a_3p,ath-miR447b,ath-miR850
ath-miR447a_3p	-1.03786	-0.800166	-1.1488	-1.54897	AT5G60760	-0.560157	-0.307366	-0.134102	-0.199521	AT5G60760	P-loop containing nucleoside triphosphate hydrolases superfamily protein [Source:TAIR;Acc:AT5G60760]	ath-miR447a_3p,ath-miR447b
ath-miR447a_3p	-1.03786	-0.800166	-1.1488	-1.54897	AT4G19950	-0.058853	-0.426755	-0.243244	-0.640036	AT4G19950	unknown protein; BEST Arabidopsis thaliana protein match is: unknown protein (TAIR:AT5G44860.1); Has 338 Blast hits to 330 proteins in 72 species: Archae - 2; Bacteria - 94; Metazoa - 7; Fungi - 0; Plants - 232; Viruses - 0; Other Eukaryotes - 3 (so /.../NCBI BLink). [Source:TAIR;Acc:AT4G19950]	ath-miR447a_3p,ath-miR447b
ath-miR447a_3p	-1.03786	-0.800166	-1.1488	-1.54897	AT4G28680	-0.319536	-0.255869	-1.04368	-1.23672	TYRDC	L-tyrosine decarboxylase [Source:TAIR;Acc:AT4G28680]	ath-miR447a_3p,ath-miR447b
ath-miR447a_3p	-1.03786	-0.800166	-1.1488	-1.54897	AT5G35160	0.303966	0.207494	-0.316043	-0.192604	AT5G35160	Endomembrane protein 70 protein family [Source:TAIR;Acc:AT5G35160]	ath-miR447a_3p,ath-miR447b
ath-miR447a_3p	-1.03786	-0.800166	-1.1488	-1.54897	AT1G21090	0.421745	0.266755	-0.217896	-0.207307	AT1G21090	Cupredoxin superfamily protein [Source:TAIR;Acc:AT1G21090]	ath-miR397b,ath-miR447a_3p,ath-miR447b
ath-miR447b	-1.03786	-0.800166	-1.1488	-1.54897	AT4G15735	-0.109566	-0.0625276	0.300145	1.94853	SCRL10	SCR-like 10 [Source:TAIR;Acc:AT4G15735]	ath-miR447a_3p,ath-miR447b
ath-miR447b	-1.03786	-0.800166	-1.1488	-1.54897	AT5G16030	0.49281	0.407555	1.00628	1.44056	AT5G16030	unknown protein; BEST Arabidopsis thaliana protein match is: unknown protein (TAIR:AT3G02500.1); Has 30201 Blast hits to 17322 proteins in 780 species: Archae - 12; Bacteria - 1396; Metazoa - 17338; Fungi - 3422; Plants - 5037; Viruses - 0; Other Eu /.../es - 2996 (source: NCBI BLink). [Source:TAIR;Acc:AT5G16030]	ath-miR447a_3p,ath-miR447b
ath-miR447b	-1.03786	-0.800166	-1.1488	-1.54897	AT2G22650	0.112912	-0.00501736	0.479673	0.478742	AT2G22650	FAD-dependent oxidoreductase family protein [Source:TAIR;Acc:AT2G22650]	ath-miR447a_3p,ath-miR447b
ath-miR447b	-1.03786	-0.800166	-1.1488	-1.54897	AT5G07890	-0.116303	-0.099235	0.387262	0.37457	AT5G07890	myosin heavy chain-related [Source:TAIR;Acc:AT5G07890]	ath-miR447a_3p,ath-miR447b
ath-miR447b	-1.03786	-0.800166	-1.1488	-1.54897	AT1G68820	-0.161822	0.041529	0.21897	0.314822	AT1G68820	Transmembrane Fragile-X-F-associated protein [Source:TAIR;Acc:AT1G68820]	ath-miR447a_3p,ath-miR447b
ath-miR447b	-1.03786	-0.800166	-1.1488	-1.54897	AT5G42870	-0.125409	-0.0026663	0.269658	0.39831	PAH2	phosphatidic acid phosphohydrolase 2 [Source:TAIR;Acc:AT5G42870]	ath-miR447a_3p,ath-miR447b
ath-miR447b	-1.03786	-0.800166	-1.1488	-1.54897	AT1G79750	-0.0275946	-0.0222471	0.292628	0.283692	ATNADP-ME4	NADP-malic enzyme 4 [Source:TAIR;Acc:AT1G79750]	ath-miR447a_3p,ath-miR447b
ath-miR447b	-1.03786	-0.800166	-1.1488	-1.54897	AT4G36860	0.413838	0.294118	0.171715	0.237898	DAR1	LIM domain-containing protein [Source:TAIR;Acc:AT4G36860]	ath-miR157a,ath-miR157b,ath-miR157c,ath-miR447a_3p,ath-miR447b
ath-miR447b	-1.03786	-0.800166	-1.1488	-1.54897	AT2G40095	0.548403	-0.0333191	0.0296125	0.772647	AT2G40095	Alpha/beta hydrolase related protein [Source:TAIR;Acc:AT2G40095]	ath-miR447a_3p,ath-miR447b
ath-miR447b	-1.03786	-0.800166	-1.1488	-1.54897	AT5G26210	0.361294	0.206926	0.48806	0.454486	AL4	alfin-like 4 [Source:TAIR;Acc:AT5G26210]	ath-miR447a_3p,ath-miR447b
ath-miR447b	-1.03786	-0.800166	-1.1488	-1.54897	AT1G79270	-1.98848	-1.09868	-1.07947	-1.2959	ECT8	evolutionarily conserved C-terminal region 8 [Source:TAIR;Acc:AT1G79270]	ath-miR447a_3p,ath-miR447b
ath-miR447b	-1.03786	-0.800166	-1.1488	-1.54897	AT3G21965	-1.23047	-0.397952	-0.497101	-1.24091	AT3G21965	pseudogene, similar to OJ1058_A12.21, contains Pfam profile: PF01657 Domain of unknown function; blastp match of 34% identity and 2.8e-22 P-value to GP [Source:TAIR;Acc:AT3G21965]	ath-miR447a_3p,ath-miR447b
ath-miR447b	-1.03786	-0.800166	-1.1488	-1.54897	AT4G20780	-1.17274	-0.669694	-0.709382	-1.20513	CML42	calmodulin like 42 [Source:TAIR;Acc:AT4G20780]	ath-miR447a_3p,ath-miR447b
ath-miR447b	-1.03786	-0.800166	-1.1488	-1.54897	AT5G54560	-1.41975	-0.856815	-0.842819	-0.675949	AT5G54560	Protein of unknown function (DUF295) [Source:TAIR;Acc:AT5G54560]	ath-miR447a_3p,ath-miR447b
ath-miR447b	-1.03786	-0.800166	-1.1488	-1.54897	AT1G78440	-1.7228	-0.875135	0.0417937	-0.147221	ATGA2OX1	Arabidopsis thaliana gibberellin 2-oxidase 1 [Source:TAIR;Acc:AT1G78440]	ath-miR447a_3p,ath-miR447b
ath-miR447b	-1.03786	-0.800166	-1.1488	-1.54897	AT3G50390	-0.883986	-0.744716	-0.35019	-0.574888	AT3G50390	Transducin/WD40 repeat-like superfamily protein [Source:TAIR;Acc:AT3G50390]	ath-miR447a_3p,ath-miR447b,ath-miR850
ath-miR447b	-1.03786	-0.800166	-1.1488	-1.54897	AT5G60760	-0.560157	-0.307366	-0.134102	-0.199521	AT5G60760	P-loop containing nucleoside triphosphate hydrolases superfamily protein [Source:TAIR;Acc:AT5G60760]	ath-miR447a_3p,ath-miR447b
ath-miR447b	-1.03786	-0.800166	-1.1488	-1.54897	AT4G19950	-0.058853	-0.426755	-0.243244	-0.640036	AT4G19950	unknown protein; BEST Arabidopsis thaliana protein match is: unknown protein (TAIR:AT5G44860.1); Has 338 Blast hits to 330 proteins in 72 species: Archae - 2; Bacteria - 94; Metazoa - 7; Fungi - 0; Plants - 232; Viruses - 0; Other Eukaryotes - 3 (so /.../NCBI BLink). [Source:TAIR;Acc:AT4G19950]	ath-miR447a_3p,ath-miR447b
ath-miR447b	-1.03786	-0.800166	-1.1488	-1.54897	AT4G28680	-0.319536	-0.255869	-1.04368	-1.23672	TYRDC	L-tyrosine decarboxylase [Source:TAIR;Acc:AT4G28680]	ath-miR447a_3p,ath-miR447b
ath-miR447b	-1.03786	-0.800166	-1.1488	-1.54897	AT5G35160	0.303966	0.207494	-0.316043	-0.192604	AT5G35160	Endomembrane protein 70 protein family [Source:TAIR;Acc:AT5G35160]	ath-miR447a_3p,ath-miR447b
ath-miR447b	-1.03786	-0.800166	-1.1488	-1.54897	AT1G21090	0.421745	0.266755	-0.217896	-0.207307	AT1G21090	Cupredoxin superfamily protein [Source:TAIR;Acc:AT1G21090]	ath-miR397b,ath-miR447a_3p,ath-miR447b
ath-miR164c	-0.281499	-0.513814	-1.51539	-1.4497	AT1G05890	-0.223153	-0.205867	0.780154	0.765923	ARI5	RING/U-box superfamily protein [Source:TAIR;Acc:AT1G05890]	ath-miR164a,ath-miR164b,ath-miR164c
ath-miR164c	-0.281499	-0.513814	-1.51539	-1.4497	AT5G53950	1.22669	0.370464	0.434992	0.120063	CUC2	NAC (No Apical Meristem) domain transcriptional regulator superfamily protein [Source:TAIR;Acc:AT5G53950]	ath-miR164a,ath-miR164b,ath-miR164c
ath-miR164c	-0.281499	-0.513814	-1.51539	-1.4497	AT1G78240	0.0460293	0.0481406	0.356936	0.45354	TSD2	S-adenosyl-L-methionine-dependent methyltransferases superfamily protein [Source:TAIR;Acc:AT1G78240]	ath-miR164a,ath-miR164b,ath-miR164c
ath-miR164c	-0.281499	-0.513814	-1.51539	-1.4497	AT5G07680	-1.19357	-0.271756	-0.931315	-0.597645	ANAC080	NAC domain containing protein 80 [Source:TAIR;Acc:AT5G07680]	ath-miR164a,ath-miR164b,ath-miR164c
ath-miR164c	-0.281499	-0.513814	-1.51539	-1.4497	AT5G61430	-0.782371	-0.032911	-0.953114	-0.411496	ANAC100	NAC domain containing protein 100 [Source:TAIR;Acc:AT5G61430]	ath-miR164a,ath-miR164b,ath-miR164c
ath-miR164c	-0.281499	-0.513814	-1.51539	-1.4497	AT5G61660	-0.71674	-0.123734	-0.955187	-1.11277	AT5G61660	glycine-rich protein [Source:TAIR;Acc:AT5G61660]	ath-miR164c
ath-miR164c	-0.281499	-0.513814	-1.51539	-1.4497	AT4G02410	-0.756366	-0.451792	-0.627876	-0.419424	LECRK43	Concanavalin A-like lectin protein kinase family protein [Source:TAIR;Acc:AT4G02410]	ath-miR164c
ath-miR164a	-0.281499	-0.513814	-1.51539	-1.4497	AT1G05890	-0.223153	-0.205867	0.780154	0.765923	ARI5	RING/U-box superfamily protein [Source:TAIR;Acc:AT1G05890]	ath-miR164a,ath-miR164b,ath-miR164c
ath-miR164a	-0.281499	-0.513814	-1.51539	-1.4497	AT5G53950	1.22669	0.370464	0.434992	0.120063	CUC2	NAC (No Apical Meristem) domain transcriptional regulator superfamily protein [Source:TAIR;Acc:AT5G53950]	ath-miR164a,ath-miR164b,ath-miR164c
ath-miR164a	-0.281499	-0.513814	-1.51539	-1.4497	AT1G78240	0.0460293	0.0481406	0.356936	0.45354	TSD2	S-adenosyl-L-methionine-dependent methyltransferases superfamily protein [Source:TAIR;Acc:AT1G78240]	ath-miR164a,ath-miR164b,ath-miR164c
ath-miR164a	-0.281499	-0.513814	-1.51539	-1.4497	AT5G07680	-1.19357	-0.271756	-0.931315	-0.597645	ANAC080	NAC domain containing protein 80 [Source:TAIR;Acc:AT5G07680]	ath-miR164a,ath-miR164b,ath-miR164c
ath-miR164a	-0.281499	-0.513814	-1.51539	-1.4497	AT5G61430	-0.782371	-0.032911	-0.953114	-0.411496	ANAC100	NAC domain containing protein 100 [Source:TAIR;Acc:AT5G61430]	ath-miR164a,ath-miR164b,ath-miR164c
ath-miR164b	-0.281499	-0.513814	-1.51539	-1.4497	AT1G05890	-0.223153	-0.205867	0.780154	0.765923	ARI5	RING/U-box superfamily protein [Source:TAIR;Acc:AT1G05890]	ath-miR164a,ath-miR164b,ath-miR164c
ath-miR164b	-0.281499	-0.513814	-1.51539	-1.4497	AT5G53950	1.22669	0.370464	0.434992	0.120063	CUC2	NAC (No Apical Meristem) domain transcriptional regulator superfamily protein [Source:TAIR;Acc:AT5G53950]	ath-miR164a,ath-miR164b,ath-miR164c
ath-miR164b	-0.281499	-0.513814	-1.51539	-1.4497	AT1G78240	0.0460293	0.0481406	0.356936	0.45354	TSD2	S-adenosyl-L-methionine-dependent methyltransferases superfamily protein [Source:TAIR;Acc:AT1G78240]	ath-miR164a,ath-miR164b,ath-miR164c
ath-miR164b	-0.281499	-0.513814	-1.51539	-1.4497	AT1G32750	-0.0183502	-0.0647006	0.177658	0.174857	HAF01	HAC13 protein (HAC13) [Source:TAIR;Acc:AT1G32750]	ath-miR164b
ath-miR164b	-0.281499	-0.513814	-1.51539	-1.4497	AT3G04600	0.291068	0.282292	0.275853	0.305136	AT3G04600	Nucleotidylyl transferase superfamily protein [Source:TAIR;Acc:AT3G04600]	ath-miR164b
ath-miR164b	-0.281499	-0.513814	-1.51539	-1.4497	AT5G10920	0.262154	0.155852	0.220231	0.362606	T30N20_190	L-Aspartase-like family protein [Source:TAIR;Acc:AT5G10920]	ath-miR164b
ath-miR164b	-0.281499	-0.513814	-1.51539	-1.4497	AT2G03310	0.271126	0.252585	0.511786	0.841629	AT2G03310	unknown protein; Has 17 Blast hits to 17 proteins in 6 species: Archae - 0; Bacteria - 0; Metazoa - 0; Fungi - 0; Plants - 17; Viruses - 0; Other Eukaryotes - 0 (source: NCBI BLink). [Source:TAIR;Acc:AT2G03310]	ath-miR164b
ath-miR164b	-0.281499	-0.513814	-1.51539	-1.4497	AT1G27921	0.50387	0.372506	0.534283	0.454034	AT1G27921	other RNA [Source:TAIR;Acc:AT1G27921]	ath-miR164b
ath-miR164b	-0.281499	-0.513814	-1.51539	-1.4497	AT5G07680	-1.19357	-0.271756	-0.931315	-0.597645	ANAC080	NAC domain containing protein 80 [Source:TAIR;Acc:AT5G07680]	ath-miR164a,ath-miR164b,ath-miR164c
ath-miR164b	-0.281499	-0.513814	-1.51539	-1.4497	AT5G61430	-0.782371	-0.032911	-0.953114	-0.411496	ANAC100	NAC domain containing protein 100 [Source:TAIR;Acc:AT5G61430]	ath-miR164a,ath-miR164b,ath-miR164c
ath-miR858a	-0.925542	-0.00484698	-1.26602	-1.24625	AT3G46130	-0.0244194	0.309276	0.00621994	1.33656	ATMYB48-1	myb domain protein 48 [Source:TAIR;Acc:AT3G46130]	ath-miR858a
ath-miR858a	-0.925542	-0.00484698	-1.26602	-1.24625	AT5G49620	0.00586349	-0.166037	1.02494	0.585392	MYB78	myb domain protein 78 [Source:TAIR;Acc:AT5G49620]	ath-miR858a
ath-miR858a	-0.925542	-0.00484698	-1.26602	-1.24625	AT2G47190	-0.720441	-0.293765	0.671455	0.773544	ATMYB2	myb domain protein 2 [Source:TAIR;Acc:AT2G47190]	ath-miR858a
ath-miR858a	-0.925542	-0.00484698	-1.26602	-1.24625	AT5G60890	1.86209	1.4123	-0.140795	-0.300678	ATMYB34	myb domain protein 34 [Source:TAIR;Acc:AT5G60890]	ath-miR858a,ath-miR858b
ath-miR858a	-0.925542	-0.00484698	-1.26602	-1.24625	AT5G52600	2.28069	0.989452	0.0671551	0.282769	AtMYB82	myb domain protein 82 [Source:TAIR;Acc:AT5G52600]	ath-miR858a,ath-miR858b
ath-miR858a	-0.925542	-0.00484698	-1.26602	-1.24625	AT5G23000	1.20517	0.541558	0.6508	0.194972	RAX1	myb domain protein 37 [Source:TAIR;Acc:AT5G23000]	ath-miR858a,ath-miR858b
ath-miR858a	-0.925542	-0.00484698	-1.26602	-1.24625	AT1G09540	1.08561	0.363939	0.430732	0.859799	MYB61	myb domain protein 61 [Source:TAIR;Acc:AT1G09540]	ath-miR858a
ath-miR858a	-0.925542	-0.00484698	-1.26602	-1.24625	AT1G21760	-0.383203	-0.158524	0.275245	0.22259	ATFBP7	F-box protein 7 [Source:TAIR;Acc:AT1G21760]	ath-miR858a,ath-miR858b
ath-miR858a	-0.925542	-0.00484698	-1.26602	-1.24625	AT3G59470	0.015292	-0.00330885	0.303246	0.303578	AT3G59470	Far-red impaired responsive (FAR1) family protein [Source:TAIR;Acc:AT3G59470]	ath-miR858a
ath-miR858a	-0.925542	-0.00484698	-1.26602	-1.24625	AT1G06180	0.393948	0.144285	0.5042	0.316627	ATMYB13	myb domain protein 13 [Source:TAIR;Acc:AT1G06180]	ath-miR858a,ath-miR858b
ath-miR858a	-0.925542	-0.00484698	-1.26602	-1.24625	AT3G02940	0.164737	0.24779	0.443516	0.596953	MYB107	myb domain protein 107 [Source:TAIR;Acc:AT3G02940]	ath-miR858a
ath-miR858a	-0.925542	-0.00484698	-1.26602	-1.24625	AT3G12820	0.667057	0.416375	0.410132	0.551428	AtMYB10	myb domain protein 10 [Source:TAIR;Acc:AT3G12820]	ath-miR858a
ath-miR858a	-0.925542	-0.00484698	-1.26602	-1.24625	AT5G62320	0.59609	0.368521	0.45886	0.537041	MYB99	myb domain protein 99 [Source:TAIR;Acc:AT5G62320]	ath-miR858a
ath-miR858a	-0.925542	-0.00484698	-1.26602	-1.24625	AT3G01530	-0.705624	-0.0651634	-2.93942	-1.5665	ATMYB57	myb domain protein 57 [Source:TAIR;Acc:AT3G01530]	ath-miR858a
ath-miR858a	-0.925542	-0.00484698	-1.26602	-1.24625	AT3G62610	-0.547797	0.259791	-1.88077	-1.86135	ATMYB11	myb domain protein 11 [Source:TAIR;Acc:AT3G62610]	ath-miR780.2,ath-miR858a,ath-miR858b
ath-miR858a	-0.925542	-0.00484698	-1.26602	-1.24625	AT3G27810	-2.34178	-1.33354	-1.02365	-0.787333	ATMYB21	myb domain protein 21 [Source:TAIR;Acc:AT3G27810]	ath-miR858a
ath-miR858a	-0.925542	-0.00484698	-1.26602	-1.24625	AT3G57020	-1.79983	-1.07912	-1.15963	-1.43292	AT3G57020	Calcium-dependent phosphotriesterase superfamily protein [Source:TAIR;Acc:AT3G57020]	ath-miR858a
ath-miR858a	-0.925542	-0.00484698	-1.26602	-1.24625	AT4G21440	-1.02554	-0.36527	-0.625234	-1.4905	ATMYB102	MYB-like 102 [Source:TAIR;Acc:AT4G21440]	ath-miR858a
ath-miR858a	-0.925542	-0.00484698	-1.26602	-1.24625	AT4G05100	-0.790063	-0.690264	-0.524873	-1.241	AtMYB74	myb domain protein 74 [Source:TAIR;Acc:AT4G05100]	ath-miR858a
ath-miR858a	-0.925542	-0.00484698	-1.26602	-1.24625	AT1G63910	-1.00131	-0.49739	-1.6655	-0.781066	AtMYB103	myb domain protein 103 [Source:TAIR;Acc:AT1G63910]	ath-miR858a
ath-miR858a	-0.925542	-0.00484698	-1.26602	-1.24625	AT2G03630	-1.67999	-1.04712	-0.701312	-0.796703	AT2G03630	unknown protein; BEST Arabidopsis thaliana protein match is: unknown protein (TAIR:AT1G74220.1); Has 126 Blast hits to 126 proteins in 28 species: Archae - 0; Bacteria - 6; Metazoa - 7; Fungi - 5; Plants - 87; Viruses - 0; Other Eukaryotes - 21 (sou /.../CBI BLink). [Source:TAIR;Acc:AT2G03630]	ath-miR858a,ath-miR858b
ath-miR858a	-0.925542	-0.00484698	-1.26602	-1.24625	AT3G06490	-1.95524	-1.25952	-0.537215	-0.112736	MYB108	myb domain protein 108 [Source:TAIR;Acc:AT3G06490]	ath-miR858a
ath-miR858a	-0.925542	-0.00484698	-1.26602	-1.24625	AT4G26930	-0.972549	-0.712641	-0.495146	-0.0409764	MYB97	myb domain protein 97 [Source:TAIR;Acc:AT4G26930]	ath-miR159a,ath-miR159b,ath-miR159c,ath-miR858a
ath-miR858a	-0.925542	-0.00484698	-1.26602	-1.24625	AT1G48000	-1.05786	-0.477424	0.124213	-0.478309	MYB112	myb domain protein 112 [Source:TAIR;Acc:AT1G48000]	ath-miR858a
ath-miR858a	-0.925542	-0.00484698	-1.26602	-1.24625	AT1G68320	-0.967461	-0.516993	-0.285504	-0.371342	MYB62	myb domain protein 62 [Source:TAIR;Acc:AT1G68320]	ath-miR858a
ath-miR858a	-0.925542	-0.00484698	-1.26602	-1.24625	AT1G25340	-0.712638	-0.198162	0.59095	-0.236481	MYB116	myb domain protein 116 [Source:TAIR;Acc:AT1G25340]	ath-miR858a
ath-miR858a	-0.925542	-0.00484698	-1.26602	-1.24625	AT5G62460	-0.424313	-0.273296	-0.116321	-0.0995845	AT5G62460	RING/FYVE/PHD zinc finger superfamily protein [Source:TAIR;Acc:AT5G62460]	ath-miR858a
ath-miR858a	-0.925542	-0.00484698	-1.26602	-1.24625	AT4G22680	-0.899219	0.682221	-0.0947114	0.222014	MYB85	myb domain protein 85 [Source:TAIR;Acc:AT4G22680]	ath-miR858a
ath-miR858a	-0.925542	-0.00484698	-1.26602	-1.24625	AT1G22640	-0.808324	-0.37101	-0.188235	-0.0323211	ATMYB3	myb domain protein 3 [Source:TAIR;Acc:AT1G22640]	ath-miR858a
ath-miR858a	-0.925542	-0.00484698	-1.26602	-1.24625	AT4G09460	-0.824958	-0.236372	-0.0165042	0.369911	AtMYB6	myb domain protein 6 [Source:TAIR;Acc:AT4G09460]	ath-miR858a,ath-miR858b
ath-miR858a	-0.925542	-0.00484698	-1.26602	-1.24625	AT3G08500	-0.179943	-0.252032	-1.24997	-0.694714	MYB83	myb domain protein 83 [Source:TAIR;Acc:AT3G08500]	ath-miR858a,ath-miR858b
ath-miR858a	-0.925542	-0.00484698	-1.26602	-1.24625	AT5G12870	-0.689965	-0.125035	-1.02337	-0.631217	ATMYB46	myb domain protein 46 [Source:TAIR;Acc:AT5G12870]	ath-miR858a
ath-miR858a	-0.925542	-0.00484698	-1.26602	-1.24625	AT2G47460	-0.68956	-0.276085	-0.873069	-0.733796	MYB12	myb domain protein 12 [Source:TAIR;Acc:AT2G47460]	ath-miR858a,ath-miR858b
ath-miR858a	-0.925542	-0.00484698	-1.26602	-1.24625	AT4G34990	-0.460483	-0.0846012	-0.339602	-0.276472	AtMYB32	myb domain protein 32 [Source:TAIR;Acc:AT4G34990]	ath-miR858a
ath-miR858a	-0.925542	-0.00484698	-1.26602	-1.24625	AT5G49330	-0.494994	-0.333076	-0.490076	-0.218989	MYB111	myb domain protein 111 [Source:TAIR;Acc:AT5G49330]	ath-miR858a,ath-miR858b
ath-miR858a	-0.925542	-0.00484698	-1.26602	-1.24625	AT3G11440	-0.313293	-0.410965	-0.285783	-0.23939	ATMYB65	myb domain protein 65 [Source:TAIR;Acc:AT3G11440]	ath-miR159a,ath-miR159b,ath-miR159c,ath-miR858a,ath-miR858b
ath-miR858a	-0.925542	-0.00484698	-1.26602	-1.24625	AT4G38620	0.176672	0.158195	-0.408423	-0.269344	ATMYB4	myb domain protein 4 [Source:TAIR;Acc:AT4G38620]	ath-miR858a
ath-miR858a	-0.925542	-0.00484698	-1.26602	-1.24625	AT5G10100	0.623041	0.527199	-0.30017	-0.356793	TPPI	Haloacid dehalogenase-like hydrolase (HAD) superfamily protein [Source:TAIR;Acc:AT5G10100]	ath-miR858a,ath-miR858b
ath-miR858a	-0.925542	-0.00484698	-1.26602	-1.24625	AT5G26660	0.666757	0.869376	-0.284989	-0.0361482	ATMYB86	myb domain protein 86 [Source:TAIR;Acc:AT5G26660]	ath-miR858a
ath-miR858b	-1.1274	0.00100943	-1.08523	-1.17098	AT1G71030	-0.0824391	-0.346384	1.92714	2.09667	ATMYBL2	MYB-like 2 [Source:TAIR;Acc:AT1G71030]	ath-miR858b
ath-miR858b	-1.1274	0.00100943	-1.08523	-1.17098	AT5G60890	1.86209	1.4123	-0.140795	-0.300678	ATMYB34	myb domain protein 34 [Source:TAIR;Acc:AT5G60890]	ath-miR858a,ath-miR858b
ath-miR858b	-1.1274	0.00100943	-1.08523	-1.17098	AT5G52600	2.28069	0.989452	0.0671551	0.282769	AtMYB82	myb domain protein 82 [Source:TAIR;Acc:AT5G52600]	ath-miR858a,ath-miR858b
ath-miR858b	-1.1274	0.00100943	-1.08523	-1.17098	AT5G23000	1.20517	0.541558	0.6508	0.194972	RAX1	myb domain protein 37 [Source:TAIR;Acc:AT5G23000]	ath-miR858a,ath-miR858b
ath-miR858b	-1.1274	0.00100943	-1.08523	-1.17098	AT5G35550	1.24554	0.871036	0.0623527	0.756711	TT2	Duplicated homeodomain-like superfamily protein [Source:TAIR;Acc:AT5G35550]	ath-miR858b
ath-miR858b	-1.1274	0.00100943	-1.08523	-1.17098	AT1G21760	-0.383203	-0.158524	0.275245	0.22259	ATFBP7	F-box protein 7 [Source:TAIR;Acc:AT1G21760]	ath-miR858a,ath-miR858b
ath-miR858b	-1.1274	0.00100943	-1.08523	-1.17098	AT1G54380	-0.0227645	-0.130038	0.278369	0.20023	AT1G54380	spliceosome protein-related [Source:TAIR;Acc:AT1G54380]	ath-miR858b
ath-miR858b	-1.1274	0.00100943	-1.08523	-1.17098	AT4G02990	0.371838	0.273512	0.0208244	0.0961874	AT4G02990	Mitochondrial transcription termination factor family protein [Source:TAIR;Acc:AT4G02990]	ath-miR858b
ath-miR858b	-1.1274	0.00100943	-1.08523	-1.17098	AT3G20630	0.237031	0.13782	0.231266	0.160586	UBP14	ubiquitin-specific protease 14 [Source:TAIR;Acc:AT3G20630]	ath-miR858b
ath-miR858b	-1.1274	0.00100943	-1.08523	-1.17098	AT1G06180	0.393948	0.144285	0.5042	0.316627	ATMYB13	myb domain protein 13 [Source:TAIR;Acc:AT1G06180]	ath-miR858a,ath-miR858b
ath-miR858b	-1.1274	0.00100943	-1.08523	-1.17098	AT2G17845	-1.12281	-0.636327	-3.02063	-1.51084	AT2G17845	NAD(P)-binding Rossmann-fold superfamily protein [Source:TAIR;Acc:AT2G17845]	ath-miR858b
ath-miR858b	-1.1274	0.00100943	-1.08523	-1.17098	AT3G62610	-0.547797	0.259791	-1.88077	-1.86135	ATMYB11	myb domain protein 11 [Source:TAIR;Acc:AT3G62610]	ath-miR780.2,ath-miR858a,ath-miR858b
ath-miR858b	-1.1274	0.00100943	-1.08523	-1.17098	AT2G03630	-1.67999	-1.04712	-0.701312	-0.796703	AT2G03630	unknown protein; BEST Arabidopsis thaliana protein match is: unknown protein (TAIR:AT1G74220.1); Has 126 Blast hits to 126 proteins in 28 species: Archae - 0; Bacteria - 6; Metazoa - 7; Fungi - 5; Plants - 87; Viruses - 0; Other Eukaryotes - 21 (sou /.../CBI BLink). [Source:TAIR;Acc:AT2G03630]	ath-miR858a,ath-miR858b
ath-miR858b	-1.1274	0.00100943	-1.08523	-1.17098	AT4G09460	-0.824958	-0.236372	-0.0165042	0.369911	AtMYB6	myb domain protein 6 [Source:TAIR;Acc:AT4G09460]	ath-miR858a,ath-miR858b
ath-miR858b	-1.1274	0.00100943	-1.08523	-1.17098	AT3G08500	-0.179943	-0.252032	-1.24997	-0.694714	MYB83	myb domain protein 83 [Source:TAIR;Acc:AT3G08500]	ath-miR858a,ath-miR858b
ath-miR858b	-1.1274	0.00100943	-1.08523	-1.17098	AT2G47460	-0.68956	-0.276085	-0.873069	-0.733796	MYB12	myb domain protein 12 [Source:TAIR;Acc:AT2G47460]	ath-miR858a,ath-miR858b
ath-miR858b	-1.1274	0.00100943	-1.08523	-1.17098	AT5G42880	-0.694496	-0.617996	-0.539606	-0.710365	WEL3	Plant protein of unknown function (DUF827) [Source:TAIR;Acc:AT5G42880]	ath-miR858b
ath-miR858b	-1.1274	0.00100943	-1.08523	-1.17098	AT5G49330	-0.494994	-0.333076	-0.490076	-0.218989	MYB111	myb domain protein 111 [Source:TAIR;Acc:AT5G49330]	ath-miR858a,ath-miR858b
ath-miR858b	-1.1274	0.00100943	-1.08523	-1.17098	AT3G11440	-0.313293	-0.410965	-0.285783	-0.23939	ATMYB65	myb domain protein 65 [Source:TAIR;Acc:AT3G11440]	ath-miR159a,ath-miR159b,ath-miR159c,ath-miR858a,ath-miR858b
ath-miR858b	-1.1274	0.00100943	-1.08523	-1.17098	AT3G01720	-0.029731	0.0322436	-0.262587	-0.371411	AT3G01720	unknown protein; FUNCTIONS IN: molecular_function unknown; INVOLVED IN: biological_process unknown; LOCATED IN: endomembrane system; EXPRESSED IN: 24 plant structures; EXPRESSED DURING: 13 growth stages; BEST Arabidopsis thaliana protein match is: u /.../ protein (TAIR:AT5G25265.1); Has 374 Blast hits to 211 proteins in 23 species: Archae - 0; Bacteria - 0; Metazoa - 0; Fungi - 0; Plants - 316; V…	ath-miR858b
ath-miR858b	-1.1274	0.00100943	-1.08523	-1.17098	AT5G02420	0.0909158	0.537587	-0.48269	-0.105279	SMR3	unknown protein; Has 90 Blast hits to 90 proteins in 10 species: Archae - 0; Bacteria - 0; Metazoa - 0; Fungi - 0; Plants - 90; Viruses - 0; Other Eukaryotes - 0 (source: NCBI BLink). [Source:TAIR;Acc:AT5G02420]	ath-miR858b
ath-miR858b	-1.1274	0.00100943	-1.08523	-1.17098	AT5G10100	0.623041	0.527199	-0.30017	-0.356793	TPPI	Haloacid dehalogenase-like hydrolase (HAD) superfamily protein [Source:TAIR;Acc:AT5G10100]	ath-miR858a,ath-miR858b
ath-miR822	-0.744894	-0.854634	-1.57263	-1.27673	AT3G26240	-0.203741	-0.257095	0.664698	0.675132	AT3G26240	Cysteine/Histidine-rich C1 domain family protein [Source:TAIR;Acc:AT3G26240]	ath-miR822
ath-miR822	-0.744894	-0.854634	-1.57263	-1.27673	AT5G07580	1.629	0.952428	0.640079	1.5283	ERF106	Integrase-type DNA-binding superfamily protein [Source:TAIR;Acc:AT5G07580]	ath-miR822
ath-miR822	-0.744894	-0.854634	-1.57263	-1.27673	AT2G38410	-0.0261651	-0.0636934	0.385605	0.29266	AT2G38410	ENTH/VHS/GAT family protein [Source:TAIR;Acc:AT2G38410]	ath-miR822
ath-miR822	-0.744894	-0.854634	-1.57263	-1.27673	AT5G36160	-0.141958	0.244097	-0.461449	-0.540412	TAT	Tyrosine transaminase family protein [Source:TAIR;Acc:AT5G36160]	ath-miR822
ath-miR172e	-1.01244	-0.393704	-1.28174	-0.92282	AT4G20000	1.30152	0.0766433	0.537393	1.15495	AT4G20000	VQ motif-containing protein [Source:TAIR;Acc:AT4G20000]	ath-miR172e
ath-miR172e	-1.01244	-0.393704	-1.28174	-0.92282	AT4G10970	0.131341	0.0540074	0.19801	0.237306	AT4G10970	unknown protein; BEST Arabidopsis thaliana protein match is: unknown protein (TAIR:AT4G23910.2); Has 1807 Blast hits to 1807 proteins in 277 species: Archae - 0; Bacteria - 0; Metazoa - 736; Fungi - 347; Plants - 385; Viruses - 0; Other Eukaryotes - /.../source: NCBI BLink). [Source:TAIR;Acc:AT4G10970]	ath-miR172b_5p,ath-miR172e
ath-miR172e	-1.01244	-0.393704	-1.28174	-0.92282	AT5G60120	0.343015	0.32011	0.213367	0.191928	TOE2	target of early activation tagged (EAT) 2 [Source:TAIR;Acc:AT5G60120]	ath-miR172a,ath-miR172b_3p,ath-miR172c,ath-miR172d,ath-miR172e
ath-miR172e	-1.01244	-0.393704	-1.28174	-0.92282	AT1G67325	0.297309	0.301208	0.563519	0.454107	AT1G67325	Ran BP2/NZF zinc finger-like superfamily protein [Source:TAIR;Acc:AT1G67325]	ath-miR172e
ath-miR172e	-1.01244	-0.393704	-1.28174	-0.92282	AT5G13690	0.213465	0.16242	0.593894	0.53791	CYL1	alpha-N-acetylglucosaminidase family / NAGLU family [Source:TAIR;Acc:AT5G13690]	ath-miR172b_5p,ath-miR172e
ath-miR172e	-1.01244	-0.393704	-1.28174	-0.92282	AT2G42380	-0.825726	-0.789562	-0.57934	-0.800363	ATBZIP34	Basic-leucine zipper (bZIP) transcription factor family protein [Source:TAIR;Acc:AT2G42380]	ath-miR172e
ath-miR172e	-1.01244	-0.393704	-1.28174	-0.92282	AT2G39250	-1.2106	-0.400669	-1.04324	-1.03881	SNZ	Integrase-type DNA-binding superfamily protein [Source:TAIR;Acc:AT2G39250]	ath-miR172a,ath-miR172b_3p,ath-miR172c,ath-miR172d,ath-miR172e
ath-miR172e	-1.01244	-0.393704	-1.28174	-0.92282	AT5G36870	-0.881007	-0.692794	-0.560536	-0.128638	ATGSL09	glucan synthase-like 9 [Source:TAIR;Acc:AT5G36870]	ath-miR172e
ath-miR172e	-1.01244	-0.393704	-1.28174	-0.92282	AT3G14770	-0.503213	-0.324771	-0.626085	-0.532499	SWEET2	Nodulin MtN3 family protein [Source:TAIR;Acc:AT3G14770]	ath-miR172a,ath-miR172b_3p,ath-miR172c,ath-miR172d,ath-miR172e
ath-miR172e	-1.01244	-0.393704	-1.28174	-0.92282	AT2G04110	-0.374367	-0.18488	-0.377215	-0.532378	AT2G04110	pseudogene of unknown protein [Source:TAIR;Acc:AT2G04110]	ath-miR172b_5p,ath-miR172e
ath-miR172e	-1.01244	-0.393704	-1.28174	-0.92282	AT2G16500	-0.442297	-0.309474	-0.372038	-0.624778	ADC1	arginine decarboxylase 1 [Source:TAIR;Acc:AT2G16500]	ath-miR172b_5p,ath-miR172e
ath-miR172e	-1.01244	-0.393704	-1.28174	-0.92282	AT2G47830	-0.285988	-0.185888	-0.287278	-0.348724	MTPC1	Cation efflux family protein [Source:TAIR;Acc:AT2G47830]	ath-miR172b_5p,ath-miR172e
ath-miR172e	-1.01244	-0.393704	-1.28174	-0.92282	AT3G61820	0.646803	0.469848	-0.852928	-0.679706	AT3G61820	Eukaryotic aspartyl protease family protein [Source:TAIR;Acc:AT3G61820]	ath-miR172b_5p,ath-miR172e
ath-miR172e	-1.01244	-0.393704	-1.28174	-0.92282	AT5G65720	0.22134	0.136678	-0.175651	-0.0905323	ATNIFS1	nitrogen fixation S (NIFS)-like 1 [Source:TAIR;Acc:AT5G65720]	ath-miR172b_5p,ath-miR172e
ath-miR172e	-1.01244	-0.393704	-1.28174	-0.92282	AT4G36920	0.203515	0.324505	-0.466291	-0.0828557	AP2	Integrase-type DNA-binding superfamily protein [Source:TAIR;Acc:AT4G36920]	ath-miR172a,ath-miR172b_3p,ath-miR172c,ath-miR172d,ath-miR172e
ath-miR172e	-1.01244	-0.393704	-1.28174	-0.92282	AT5G65790	1.11936	0.539007	-0.31512	-0.0902086	ATMYB68	myb domain protein 68 [Source:TAIR;Acc:AT5G65790]	ath-miR172a,ath-miR172b_3p,ath-miR172c,ath-miR172d,ath-miR172e
ath-miR2934_5p	-0.710346	-0.525269	-1.26429	-1.1321	AT3G24860	0.546666	0.295063	0.283902	0.220987	AT3G24860	Homeodomain-like superfamily protein [Source:TAIR;Acc:AT3G24860]	ath-miR2934_5p
ath-miR2934_5p	-0.710346	-0.525269	-1.26429	-1.1321	AT5G44330	0.605584	0.389251	0.549734	0.203568	AT5G44330	Tetratricopeptide repeat (TPR)-like superfamily protein [Source:TAIR;Acc:AT5G44330]	ath-miR2934_5p
ath-miR2934_5p	-0.710346	-0.525269	-1.26429	-1.1321	AT2G07170	0.598485	0.19475	0.387096	0.340404	AT2G07170	ARM repeat superfamily protein [Source:TAIR;Acc:AT2G07170]	ath-miR2934_5p
ath-miR2934_5p	-0.710346	-0.525269	-1.26429	-1.1321	AT1G28550	-0.976652	-0.850986	-0.554798	-0.937402	AtRABA1i	RAB GTPase homolog A1I [Source:TAIR;Acc:AT1G28550]	ath-miR2934_5p
ath-miR2934_5p	-0.710346	-0.525269	-1.26429	-1.1321	AT4G07850	-1.08348	-0.669313	-0.781733	-0.580745	AT4G07850	transposable element gene [Source:TAIR;Acc:AT4G07850]	ath-miR2934_5p
ath-miR2934_5p	-0.710346	-0.525269	-1.26429	-1.1321	AT3G23725	-0.94698	-0.272286	0.113332	-0.184374	AT3G23725	transposable element gene [Source:TAIR;Acc:AT3G23725]	ath-miR2934_5p
ath-miR2934_5p	-0.710346	-0.525269	-1.26429	-1.1321	AT1G22910	-0.00562925	0.0515936	-0.50284	-0.112291	AT1G22910	RNA-binding (RRM/RBD/RNP motifs) family protein [Source:TAIR;Acc:AT1G22910]	ath-miR2934_5p
ath-miR2934_5p	-0.710346	-0.525269	-1.26429	-1.1321	AT1G56500	-0.0288289	-0.043804	-0.45789	-0.474699	AT1G56500	haloacid dehalogenase-like hydrolase family protein [Source:TAIR;Acc:AT1G56500]	ath-miR2934_5p
ath-miR2934_5p	-0.710346	-0.525269	-1.26429	-1.1321	AT5G39220	-0.0672437	0.216705	-1.20097	-1.0431	AT5G39220	alpha/beta-Hydrolases superfamily protein [Source:TAIR;Acc:AT5G39220]	ath-miR2934_5p
ath-miR2934_5p	-0.710346	-0.525269	-1.26429	-1.1321	AT3G04520	0.231559	0.346418	-0.284343	-0.0511953	THA2	threonine aldolase 2 [Source:TAIR;Acc:AT3G04520]	ath-miR2934_5p
ath-miR2934_5p	-0.710346	-0.525269	-1.26429	-1.1321	AT1G78320	0.79662	0.599089	0.0455755	-0.162107	ATGSTU23	glutathione S-transferase TAU 23 [Source:TAIR;Acc:AT1G78320]	ath-miR2934_5p
ath-miR169n	-0.0496705	-0.000971657	2.68465	2.10432	AT5G12840	-0.130711	-0.15868	0.255582	0.152872	HAP2A	nuclear factor Y, subunit A1 [Source:TAIR;Acc:AT5G12840]	ath-miR169a,ath-miR169b,ath-miR169c,ath-miR169h,ath-miR169i,ath-miR169j,ath-miR169k,ath-miR169l,ath-miR169m,ath-miR169n
ath-miR169n	-0.0496705	-0.000971657	2.68465	2.10432	AT1G68560	0.759566	0.536868	0.354992	0.609125	ATXYL1	alpha-xylosidase 1 [Source:TAIR;Acc:AT1G68560]	ath-miR169h,ath-miR169i,ath-miR169j,ath-miR169k,ath-miR169l,ath-miR169m,ath-miR169n
ath-miR169n	-0.0496705	-0.000971657	2.68465	2.10432	AT5G06510	0.559918	0.272743	-2.11688	-1.72743	NF-YA10	nuclear factor Y, subunit A10 [Source:TAIR;Acc:AT5G06510]	ath-miR169a,ath-miR169b,ath-miR169c,ath-miR169h,ath-miR169i,ath-miR169j,ath-miR169k,ath-miR169l,ath-miR169m,ath-miR169n
ath-miR169n	-0.0496705	-0.000971657	2.68465	2.10432	AT4G35080	-0.415817	-0.185976	-0.389906	-0.282923	AT4G35080	high-affinity nickel-transport family protein [Source:TAIR;Acc:AT4G35080]	ath-miR169h,ath-miR169i,ath-miR169j,ath-miR169k,ath-miR169l,ath-miR169m,ath-miR169n
ath-miR169n	-0.0496705	-0.000971657	2.68465	2.10432	AT2G03600	-0.303089	0.0543508	-0.514	-0.922231	UPS3	ureide permease 3 [Source:TAIR;Acc:AT2G03600]	ath-miR169h,ath-miR169i,ath-miR169j,ath-miR169k,ath-miR169l,ath-miR169m,ath-miR169n
ath-miR169n	-0.0496705	-0.000971657	2.68465	2.10432	AT1G54160	0.684133	0.58845	-0.208542	-0.323814	NFYA5	nuclear factor Y, subunit A5 [Source:TAIR;Acc:AT1G54160]	ath-miR169a,ath-miR169b,ath-miR169c,ath-miR169h,ath-miR169i,ath-miR169j,ath-miR169k,ath-miR169l,ath-miR169m,ath-miR169n
ath-miR169n	-0.0496705	-0.000971657	2.68465	2.10432	AT1G72830	0.785254	0.567871	-0.30893	-0.0815651	HAP2C	nuclear factor Y, subunit A3 [Source:TAIR;Acc:AT1G72830]	ath-miR169a,ath-miR169b,ath-miR169c,ath-miR169h,ath-miR169i,ath-miR169j,ath-miR169k,ath-miR169l,ath-miR169m,ath-miR169n
ath-miR169m	-0.0496705	-0.000971657	2.68465	2.10432	AT5G12840	-0.130711	-0.15868	0.255582	0.152872	HAP2A	nuclear factor Y, subunit A1 [Source:TAIR;Acc:AT5G12840]	ath-miR169a,ath-miR169b,ath-miR169c,ath-miR169h,ath-miR169i,ath-miR169j,ath-miR169k,ath-miR169l,ath-miR169m,ath-miR169n
ath-miR169m	-0.0496705	-0.000971657	2.68465	2.10432	AT1G68560	0.759566	0.536868	0.354992	0.609125	ATXYL1	alpha-xylosidase 1 [Source:TAIR;Acc:AT1G68560]	ath-miR169h,ath-miR169i,ath-miR169j,ath-miR169k,ath-miR169l,ath-miR169m,ath-miR169n
ath-miR169m	-0.0496705	-0.000971657	2.68465	2.10432	AT5G06510	0.559918	0.272743	-2.11688	-1.72743	NF-YA10	nuclear factor Y, subunit A10 [Source:TAIR;Acc:AT5G06510]	ath-miR169a,ath-miR169b,ath-miR169c,ath-miR169h,ath-miR169i,ath-miR169j,ath-miR169k,ath-miR169l,ath-miR169m,ath-miR169n
ath-miR169m	-0.0496705	-0.000971657	2.68465	2.10432	AT4G35080	-0.415817	-0.185976	-0.389906	-0.282923	AT4G35080	high-affinity nickel-transport family protein [Source:TAIR;Acc:AT4G35080]	ath-miR169h,ath-miR169i,ath-miR169j,ath-miR169k,ath-miR169l,ath-miR169m,ath-miR169n
ath-miR169m	-0.0496705	-0.000971657	2.68465	2.10432	AT2G03600	-0.303089	0.0543508	-0.514	-0.922231	UPS3	ureide permease 3 [Source:TAIR;Acc:AT2G03600]	ath-miR169h,ath-miR169i,ath-miR169j,ath-miR169k,ath-miR169l,ath-miR169m,ath-miR169n
ath-miR169m	-0.0496705	-0.000971657	2.68465	2.10432	AT1G54160	0.684133	0.58845	-0.208542	-0.323814	NFYA5	nuclear factor Y, subunit A5 [Source:TAIR;Acc:AT1G54160]	ath-miR169a,ath-miR169b,ath-miR169c,ath-miR169h,ath-miR169i,ath-miR169j,ath-miR169k,ath-miR169l,ath-miR169m,ath-miR169n
ath-miR169m	-0.0496705	-0.000971657	2.68465	2.10432	AT1G72830	0.785254	0.567871	-0.30893	-0.0815651	HAP2C	nuclear factor Y, subunit A3 [Source:TAIR;Acc:AT1G72830]	ath-miR169a,ath-miR169b,ath-miR169c,ath-miR169h,ath-miR169i,ath-miR169j,ath-miR169k,ath-miR169l,ath-miR169m,ath-miR169n
ath-miR169l	-0.0496705	-0.000971657	2.68465	2.10432	AT5G12840	-0.130711	-0.15868	0.255582	0.152872	HAP2A	nuclear factor Y, subunit A1 [Source:TAIR;Acc:AT5G12840]	ath-miR169a,ath-miR169b,ath-miR169c,ath-miR169h,ath-miR169i,ath-miR169j,ath-miR169k,ath-miR169l,ath-miR169m,ath-miR169n
ath-miR169l	-0.0496705	-0.000971657	2.68465	2.10432	AT1G68560	0.759566	0.536868	0.354992	0.609125	ATXYL1	alpha-xylosidase 1 [Source:TAIR;Acc:AT1G68560]	ath-miR169h,ath-miR169i,ath-miR169j,ath-miR169k,ath-miR169l,ath-miR169m,ath-miR169n
ath-miR169l	-0.0496705	-0.000971657	2.68465	2.10432	AT5G06510	0.559918	0.272743	-2.11688	-1.72743	NF-YA10	nuclear factor Y, subunit A10 [Source:TAIR;Acc:AT5G06510]	ath-miR169a,ath-miR169b,ath-miR169c,ath-miR169h,ath-miR169i,ath-miR169j,ath-miR169k,ath-miR169l,ath-miR169m,ath-miR169n
ath-miR169l	-0.0496705	-0.000971657	2.68465	2.10432	AT4G35080	-0.415817	-0.185976	-0.389906	-0.282923	AT4G35080	high-affinity nickel-transport family protein [Source:TAIR;Acc:AT4G35080]	ath-miR169h,ath-miR169i,ath-miR169j,ath-miR169k,ath-miR169l,ath-miR169m,ath-miR169n
ath-miR169l	-0.0496705	-0.000971657	2.68465	2.10432	AT2G03600	-0.303089	0.0543508	-0.514	-0.922231	UPS3	ureide permease 3 [Source:TAIR;Acc:AT2G03600]	ath-miR169h,ath-miR169i,ath-miR169j,ath-miR169k,ath-miR169l,ath-miR169m,ath-miR169n
ath-miR169l	-0.0496705	-0.000971657	2.68465	2.10432	AT1G54160	0.684133	0.58845	-0.208542	-0.323814	NFYA5	nuclear factor Y, subunit A5 [Source:TAIR;Acc:AT1G54160]	ath-miR169a,ath-miR169b,ath-miR169c,ath-miR169h,ath-miR169i,ath-miR169j,ath-miR169k,ath-miR169l,ath-miR169m,ath-miR169n
ath-miR169l	-0.0496705	-0.000971657	2.68465	2.10432	AT1G72830	0.785254	0.567871	-0.30893	-0.0815651	HAP2C	nuclear factor Y, subunit A3 [Source:TAIR;Acc:AT1G72830]	ath-miR169a,ath-miR169b,ath-miR169c,ath-miR169h,ath-miR169i,ath-miR169j,ath-miR169k,ath-miR169l,ath-miR169m,ath-miR169n
ath-miR169k	-0.0496705	-0.000971657	2.68465	2.10432	AT5G12840	-0.130711	-0.15868	0.255582	0.152872	HAP2A	nuclear factor Y, subunit A1 [Source:TAIR;Acc:AT5G12840]	ath-miR169a,ath-miR169b,ath-miR169c,ath-miR169h,ath-miR169i,ath-miR169j,ath-miR169k,ath-miR169l,ath-miR169m,ath-miR169n
ath-miR169k	-0.0496705	-0.000971657	2.68465	2.10432	AT1G68560	0.759566	0.536868	0.354992	0.609125	ATXYL1	alpha-xylosidase 1 [Source:TAIR;Acc:AT1G68560]	ath-miR169h,ath-miR169i,ath-miR169j,ath-miR169k,ath-miR169l,ath-miR169m,ath-miR169n
ath-miR169k	-0.0496705	-0.000971657	2.68465	2.10432	AT5G06510	0.559918	0.272743	-2.11688	-1.72743	NF-YA10	nuclear factor Y, subunit A10 [Source:TAIR;Acc:AT5G06510]	ath-miR169a,ath-miR169b,ath-miR169c,ath-miR169h,ath-miR169i,ath-miR169j,ath-miR169k,ath-miR169l,ath-miR169m,ath-miR169n
ath-miR169k	-0.0496705	-0.000971657	2.68465	2.10432	AT4G35080	-0.415817	-0.185976	-0.389906	-0.282923	AT4G35080	high-affinity nickel-transport family protein [Source:TAIR;Acc:AT4G35080]	ath-miR169h,ath-miR169i,ath-miR169j,ath-miR169k,ath-miR169l,ath-miR169m,ath-miR169n
ath-miR169k	-0.0496705	-0.000971657	2.68465	2.10432	AT2G03600	-0.303089	0.0543508	-0.514	-0.922231	UPS3	ureide permease 3 [Source:TAIR;Acc:AT2G03600]	ath-miR169h,ath-miR169i,ath-miR169j,ath-miR169k,ath-miR169l,ath-miR169m,ath-miR169n
ath-miR169k	-0.0496705	-0.000971657	2.68465	2.10432	AT1G54160	0.684133	0.58845	-0.208542	-0.323814	NFYA5	nuclear factor Y, subunit A5 [Source:TAIR;Acc:AT1G54160]	ath-miR169a,ath-miR169b,ath-miR169c,ath-miR169h,ath-miR169i,ath-miR169j,ath-miR169k,ath-miR169l,ath-miR169m,ath-miR169n
ath-miR169k	-0.0496705	-0.000971657	2.68465	2.10432	AT1G72830	0.785254	0.567871	-0.30893	-0.0815651	HAP2C	nuclear factor Y, subunit A3 [Source:TAIR;Acc:AT1G72830]	ath-miR169a,ath-miR169b,ath-miR169c,ath-miR169h,ath-miR169i,ath-miR169j,ath-miR169k,ath-miR169l,ath-miR169m,ath-miR169n
ath-miR169j	-0.0496705	-0.000971657	2.68465	2.10432	AT5G12840	-0.130711	-0.15868	0.255582	0.152872	HAP2A	nuclear factor Y, subunit A1 [Source:TAIR;Acc:AT5G12840]	ath-miR169a,ath-miR169b,ath-miR169c,ath-miR169h,ath-miR169i,ath-miR169j,ath-miR169k,ath-miR169l,ath-miR169m,ath-miR169n
ath-miR169j	-0.0496705	-0.000971657	2.68465	2.10432	AT1G68560	0.759566	0.536868	0.354992	0.609125	ATXYL1	alpha-xylosidase 1 [Source:TAIR;Acc:AT1G68560]	ath-miR169h,ath-miR169i,ath-miR169j,ath-miR169k,ath-miR169l,ath-miR169m,ath-miR169n
ath-miR169j	-0.0496705	-0.000971657	2.68465	2.10432	AT5G06510	0.559918	0.272743	-2.11688	-1.72743	NF-YA10	nuclear factor Y, subunit A10 [Source:TAIR;Acc:AT5G06510]	ath-miR169a,ath-miR169b,ath-miR169c,ath-miR169h,ath-miR169i,ath-miR169j,ath-miR169k,ath-miR169l,ath-miR169m,ath-miR169n
ath-miR169j	-0.0496705	-0.000971657	2.68465	2.10432	AT4G35080	-0.415817	-0.185976	-0.389906	-0.282923	AT4G35080	high-affinity nickel-transport family protein [Source:TAIR;Acc:AT4G35080]	ath-miR169h,ath-miR169i,ath-miR169j,ath-miR169k,ath-miR169l,ath-miR169m,ath-miR169n
ath-miR169j	-0.0496705	-0.000971657	2.68465	2.10432	AT2G03600	-0.303089	0.0543508	-0.514	-0.922231	UPS3	ureide permease 3 [Source:TAIR;Acc:AT2G03600]	ath-miR169h,ath-miR169i,ath-miR169j,ath-miR169k,ath-miR169l,ath-miR169m,ath-miR169n
ath-miR169j	-0.0496705	-0.000971657	2.68465	2.10432	AT1G54160	0.684133	0.58845	-0.208542	-0.323814	NFYA5	nuclear factor Y, subunit A5 [Source:TAIR;Acc:AT1G54160]	ath-miR169a,ath-miR169b,ath-miR169c,ath-miR169h,ath-miR169i,ath-miR169j,ath-miR169k,ath-miR169l,ath-miR169m,ath-miR169n
ath-miR169j	-0.0496705	-0.000971657	2.68465	2.10432	AT1G72830	0.785254	0.567871	-0.30893	-0.0815651	HAP2C	nuclear factor Y, subunit A3 [Source:TAIR;Acc:AT1G72830]	ath-miR169a,ath-miR169b,ath-miR169c,ath-miR169h,ath-miR169i,ath-miR169j,ath-miR169k,ath-miR169l,ath-miR169m,ath-miR169n
ath-miR169h	-0.0496705	-0.000971657	2.68465	2.10432	AT5G12840	-0.130711	-0.15868	0.255582	0.152872	HAP2A	nuclear factor Y, subunit A1 [Source:TAIR;Acc:AT5G12840]	ath-miR169a,ath-miR169b,ath-miR169c,ath-miR169h,ath-miR169i,ath-miR169j,ath-miR169k,ath-miR169l,ath-miR169m,ath-miR169n
ath-miR169h	-0.0496705	-0.000971657	2.68465	2.10432	AT1G68560	0.759566	0.536868	0.354992	0.609125	ATXYL1	alpha-xylosidase 1 [Source:TAIR;Acc:AT1G68560]	ath-miR169h,ath-miR169i,ath-miR169j,ath-miR169k,ath-miR169l,ath-miR169m,ath-miR169n
ath-miR169h	-0.0496705	-0.000971657	2.68465	2.10432	AT5G06510	0.559918	0.272743	-2.11688	-1.72743	NF-YA10	nuclear factor Y, subunit A10 [Source:TAIR;Acc:AT5G06510]	ath-miR169a,ath-miR169b,ath-miR169c,ath-miR169h,ath-miR169i,ath-miR169j,ath-miR169k,ath-miR169l,ath-miR169m,ath-miR169n
ath-miR169h	-0.0496705	-0.000971657	2.68465	2.10432	AT4G35080	-0.415817	-0.185976	-0.389906	-0.282923	AT4G35080	high-affinity nickel-transport family protein [Source:TAIR;Acc:AT4G35080]	ath-miR169h,ath-miR169i,ath-miR169j,ath-miR169k,ath-miR169l,ath-miR169m,ath-miR169n
ath-miR169h	-0.0496705	-0.000971657	2.68465	2.10432	AT2G03600	-0.303089	0.0543508	-0.514	-0.922231	UPS3	ureide permease 3 [Source:TAIR;Acc:AT2G03600]	ath-miR169h,ath-miR169i,ath-miR169j,ath-miR169k,ath-miR169l,ath-miR169m,ath-miR169n
ath-miR169h	-0.0496705	-0.000971657	2.68465	2.10432	AT1G54160	0.684133	0.58845	-0.208542	-0.323814	NFYA5	nuclear factor Y, subunit A5 [Source:TAIR;Acc:AT1G54160]	ath-miR169a,ath-miR169b,ath-miR169c,ath-miR169h,ath-miR169i,ath-miR169j,ath-miR169k,ath-miR169l,ath-miR169m,ath-miR169n
ath-miR169h	-0.0496705	-0.000971657	2.68465	2.10432	AT1G72830	0.785254	0.567871	-0.30893	-0.0815651	HAP2C	nuclear factor Y, subunit A3 [Source:TAIR;Acc:AT1G72830]	ath-miR169a,ath-miR169b,ath-miR169c,ath-miR169h,ath-miR169i,ath-miR169j,ath-miR169k,ath-miR169l,ath-miR169m,ath-miR169n
ath-miR169i	-0.0496705	-0.000971657	2.68465	2.10432	AT5G12840	-0.130711	-0.15868	0.255582	0.152872	HAP2A	nuclear factor Y, subunit A1 [Source:TAIR;Acc:AT5G12840]	ath-miR169a,ath-miR169b,ath-miR169c,ath-miR169h,ath-miR169i,ath-miR169j,ath-miR169k,ath-miR169l,ath-miR169m,ath-miR169n
ath-miR169i	-0.0496705	-0.000971657	2.68465	2.10432	AT1G68560	0.759566	0.536868	0.354992	0.609125	ATXYL1	alpha-xylosidase 1 [Source:TAIR;Acc:AT1G68560]	ath-miR169h,ath-miR169i,ath-miR169j,ath-miR169k,ath-miR169l,ath-miR169m,ath-miR169n
ath-miR169i	-0.0496705	-0.000971657	2.68465	2.10432	AT5G06510	0.559918	0.272743	-2.11688	-1.72743	NF-YA10	nuclear factor Y, subunit A10 [Source:TAIR;Acc:AT5G06510]	ath-miR169a,ath-miR169b,ath-miR169c,ath-miR169h,ath-miR169i,ath-miR169j,ath-miR169k,ath-miR169l,ath-miR169m,ath-miR169n
ath-miR169i	-0.0496705	-0.000971657	2.68465	2.10432	AT4G35080	-0.415817	-0.185976	-0.389906	-0.282923	AT4G35080	high-affinity nickel-transport family protein [Source:TAIR;Acc:AT4G35080]	ath-miR169h,ath-miR169i,ath-miR169j,ath-miR169k,ath-miR169l,ath-miR169m,ath-miR169n
ath-miR169i	-0.0496705	-0.000971657	2.68465	2.10432	AT2G03600	-0.303089	0.0543508	-0.514	-0.922231	UPS3	ureide permease 3 [Source:TAIR;Acc:AT2G03600]	ath-miR169h,ath-miR169i,ath-miR169j,ath-miR169k,ath-miR169l,ath-miR169m,ath-miR169n
ath-miR169i	-0.0496705	-0.000971657	2.68465	2.10432	AT1G54160	0.684133	0.58845	-0.208542	-0.323814	NFYA5	nuclear factor Y, subunit A5 [Source:TAIR;Acc:AT1G54160]	ath-miR169a,ath-miR169b,ath-miR169c,ath-miR169h,ath-miR169i,ath-miR169j,ath-miR169k,ath-miR169l,ath-miR169m,ath-miR169n
ath-miR169i	-0.0496705	-0.000971657	2.68465	2.10432	AT1G72830	0.785254	0.567871	-0.30893	-0.0815651	HAP2C	nuclear factor Y, subunit A3 [Source:TAIR;Acc:AT1G72830]	ath-miR169a,ath-miR169b,ath-miR169c,ath-miR169h,ath-miR169i,ath-miR169j,ath-miR169k,ath-miR169l,ath-miR169m,ath-miR169n
ath-miR398c	-0.491833	-0.725635	2.22443	2.67224	AT4G38440	0.0944334	-0.0765022	0.859476	0.75234	AT4G38440	LOCATED IN: chloroplast; EXPRESSED IN: 21 plant structures; EXPRESSED DURING: 12 growth stages; CONTAINS InterPro DOMAIN/s: RNA polymerase II-associated protein 1, C-terminal (InterPro:IPR013929), RNA polymerase II-associated protein 1, N-terminal ( /.../ro:IPR013930); Has 276 Blast hits to 220 proteins in 102 species: Archae - 0; Bacteria - 2; Metazoa - 151; Fungi - 65; Plants - 41; Viruses - 0;…	ath-miR398b,ath-miR398c
ath-miR398c	-0.491833	-0.725635	2.22443	2.67224	AT5G58430	-0.345199	-0.246895	0.321013	0.297081	ATEXO70B1	exocyst subunit exo70 family protein B1 [Source:TAIR;Acc:AT5G58430]	ath-miR398b,ath-miR398c
ath-miR398c	-0.491833	-0.725635	2.22443	2.67224	AT1G20910	0.137119	0.0489148	0.461689	0.334819	ARID6	ARID/BRIGHT DNA-binding domain-containing protein [Source:TAIR;Acc:AT1G20910]	ath-miR398b,ath-miR398c
ath-miR398c	-0.491833	-0.725635	2.22443	2.67224	AT1G80830	-0.0339868	-0.037084	0.52901	0.406117	NRAMP1	natural resistance-associated macrophage protein 1 [Source:TAIR;Acc:AT1G80830]	ath-miR398b,ath-miR398c
ath-miR398c	-0.491833	-0.725635	2.22443	2.67224	AT4G26230	0.302559	0.175329	0.10179	0.224002	AT4G26230	Ribosomal protein L31e family protein [Source:TAIR;Acc:AT4G26230]	ath-miR398a,ath-miR398b,ath-miR398c
ath-miR398c	-0.491833	-0.725635	2.22443	2.67224	AT1G78050	-0.333833	-0.0513948	-0.574297	-0.391256	PGM	phosphoglycerate/bisphosphoglycerate mutase [Source:TAIR;Acc:AT1G78050]	ath-miR398b,ath-miR398c
ath-miR398c	-0.491833	-0.725635	2.22443	2.67224	AT3G15640	0.0700023	0.099442	-0.32237	-0.344497	COX5B-1	Rubredoxin-like superfamily protein [Source:TAIR;Acc:AT3G15640]	ath-miR398a,ath-miR398b,ath-miR398c
ath-miR398c	-0.491833	-0.725635	2.22443	2.67224	AT1G08830	0.274796	0.194695	-0.617904	-0.444063	CSD1	copper/zinc superoxide dismutase 1 [Source:TAIR;Acc:AT1G08830]	ath-miR398a,ath-miR398b,ath-miR398c
ath-miR398a	-0.491833	-0.725635	2.22443	2.67224	AT3G45100	-0.0687694	-0.0445317	0.627808	0.589024	SETH2	UDP-Glycosyltransferase superfamily protein [Source:TAIR;Acc:AT3G45100]	ath-miR398a
ath-miR398a	-0.491833	-0.725635	2.22443	2.67224	AT3G46600	-0.541397	-0.304338	0.946069	1.04112	AT3G46600	GRAS family transcription factor [Source:TAIR;Acc:AT3G46600]	ath-miR398a
ath-miR398a	-0.491833	-0.725635	2.22443	2.67224	AT2G32880	-0.0045586	-0.318914	1.07581	1.1289	AT2G32880	TRAF-like family protein [Source:TAIR;Acc:AT2G32880]	ath-miR398a
ath-miR398a	-0.491833	-0.725635	2.22443	2.67224	AT3G10220	0.172264	0.13818	0.391451	0.423054	AT3G10220	tubulin folding cofactor B [Source:TAIR;Acc:AT3G10220]	ath-miR398a
ath-miR398a	-0.491833	-0.725635	2.22443	2.67224	AT3G12120	-0.00108573	0.0582202	0.427072	0.505836	FAD2	fatty acid desaturase 2 [Source:TAIR;Acc:AT3G12120]	ath-miR398a
ath-miR398a	-0.491833	-0.725635	2.22443	2.67224	AT4G26230	0.302559	0.175329	0.10179	0.224002	AT4G26230	Ribosomal protein L31e family protein [Source:TAIR;Acc:AT4G26230]	ath-miR398a,ath-miR398b,ath-miR398c
ath-miR398a	-0.491833	-0.725635	2.22443	2.67224	AT1G15520	-0.397233	-0.190179	-0.559573	-0.605974	PDR12	pleiotropic drug resistance 12 [Source:TAIR;Acc:AT1G15520]	ath-miR398a
ath-miR398a	-0.491833	-0.725635	2.22443	2.67224	AT3G15640	0.0700023	0.099442	-0.32237	-0.344497	COX5B-1	Rubredoxin-like superfamily protein [Source:TAIR;Acc:AT3G15640]	ath-miR398a,ath-miR398b,ath-miR398c
ath-miR398a	-0.491833	-0.725635	2.22443	2.67224	AT1G08830	0.274796	0.194695	-0.617904	-0.444063	CSD1	copper/zinc superoxide dismutase 1 [Source:TAIR;Acc:AT1G08830]	ath-miR398a,ath-miR398b,ath-miR398c
ath-miR398b	-0.491833	-0.725635	2.22443	2.67224	AT4G38440	0.0944334	-0.0765022	0.859476	0.75234	AT4G38440	LOCATED IN: chloroplast; EXPRESSED IN: 21 plant structures; EXPRESSED DURING: 12 growth stages; CONTAINS InterPro DOMAIN/s: RNA polymerase II-associated protein 1, C-terminal (InterPro:IPR013929), RNA polymerase II-associated protein 1, N-terminal ( /.../ro:IPR013930); Has 276 Blast hits to 220 proteins in 102 species: Archae - 0; Bacteria - 2; Metazoa - 151; Fungi - 65; Plants - 41; Viruses - 0;…	ath-miR398b,ath-miR398c
ath-miR398b	-0.491833	-0.725635	2.22443	2.67224	AT5G58430	-0.345199	-0.246895	0.321013	0.297081	ATEXO70B1	exocyst subunit exo70 family protein B1 [Source:TAIR;Acc:AT5G58430]	ath-miR398b,ath-miR398c
ath-miR398b	-0.491833	-0.725635	2.22443	2.67224	AT1G20910	0.137119	0.0489148	0.461689	0.334819	ARID6	ARID/BRIGHT DNA-binding domain-containing protein [Source:TAIR;Acc:AT1G20910]	ath-miR398b,ath-miR398c
ath-miR398b	-0.491833	-0.725635	2.22443	2.67224	AT1G80830	-0.0339868	-0.037084	0.52901	0.406117	NRAMP1	natural resistance-associated macrophage protein 1 [Source:TAIR;Acc:AT1G80830]	ath-miR398b,ath-miR398c
ath-miR398b	-0.491833	-0.725635	2.22443	2.67224	AT4G26230	0.302559	0.175329	0.10179	0.224002	AT4G26230	Ribosomal protein L31e family protein [Source:TAIR;Acc:AT4G26230]	ath-miR398a,ath-miR398b,ath-miR398c
ath-miR398b	-0.491833	-0.725635	2.22443	2.67224	AT1G78050	-0.333833	-0.0513948	-0.574297	-0.391256	PGM	phosphoglycerate/bisphosphoglycerate mutase [Source:TAIR;Acc:AT1G78050]	ath-miR398b,ath-miR398c
ath-miR398b	-0.491833	-0.725635	2.22443	2.67224	AT3G15640	0.0700023	0.099442	-0.32237	-0.344497	COX5B-1	Rubredoxin-like superfamily protein [Source:TAIR;Acc:AT3G15640]	ath-miR398a,ath-miR398b,ath-miR398c
ath-miR398b	-0.491833	-0.725635	2.22443	2.67224	AT1G08830	0.274796	0.194695	-0.617904	-0.444063	CSD1	copper/zinc superoxide dismutase 1 [Source:TAIR;Acc:AT1G08830]	ath-miR398a,ath-miR398b,ath-miR398c
ath-miR395e	1.39664	1.20426	1.13531	0.353439	AT4G23840	-0.188461	-0.169472	0.706122	0.514302	AT4G23840	Leucine-rich repeat (LRR) family protein [Source:TAIR;Acc:AT4G23840]	ath-miR395a,ath-miR395d,ath-miR395e,ath-miR867
ath-miR395e	1.39664	1.20426	1.13531	0.353439	AT2G28780	1.30591	0.328785	0.728506	0.58939	AT2G28780	unknown protein; INVOLVED IN: biological_process unknown; LOCATED IN: mitochondrion; EXPRESSED IN: inflorescence meristem, root, flower; EXPRESSED DURING: petal differentiation and expansion stage; CONTAINS InterPro DOMAIN/s: Protein of unknown func /.../UF939, bacterial (InterPro:IPR010343); BEST Arabidopsis thaliana protein match is: unknown protein (TAIR:AT3G09450.1); Has 671 Blast hits to 667…	ath-miR395a,ath-miR395d,ath-miR395e
ath-miR395e	1.39664	1.20426	1.13531	0.353439	AT1G20380	0.409503	0.148729	0.406863	0.445005	AT1G20380	Prolyl oligopeptidase family protein [Source:TAIR;Acc:AT1G20380]	ath-miR395a,ath-miR395d,ath-miR395e
ath-miR395e	1.39664	1.20426	1.13531	0.353439	AT3G44670	-0.432269	-0.277535	-0.323582	-0.459812	AT3G44670	Disease resistance protein (TIR-NBS-LRR class) family [Source:TAIR;Acc:AT3G44670]	ath-miR395a,ath-miR395d,ath-miR395e
ath-miR395e	1.39664	1.20426	1.13531	0.353439	AT1G56423	-0.509543	-0.189581	-0.38613	-0.388632	AT1G56423	unknown protein; FUNCTIONS IN: molecular_function unknown; INVOLVED IN: biological_process unknown; LOCATED IN: endomembrane system; Has 30201 Blast hits to 17322 proteins in 780 species: Archae - 12; Bacteria - 1396; Metazoa - 17338; Fungi - 3422; /.../ - 5037; Viruses - 0; Other Eukaryotes - 2996 (source: NCBI BLink). [Source:TAIR;Acc:AT1G56423]	ath-miR395a,ath-miR395d,ath-miR395e
ath-miR395e	1.39664	1.20426	1.13531	0.353439	AT4G14680	0.538632	0.138281	-0.905101	-0.808393	APS3	Pseudouridine synthase/archaeosine transglycosylase-like family protein [Source:TAIR;Acc:AT4G14680]	ath-miR395a,ath-miR395d,ath-miR395e
ath-miR395e	1.39664	1.20426	1.13531	0.353439	AT5G43780	0.980366	0.495247	-0.44859	-0.0135611	APS4	Pseudouridine synthase/archaeosine transglycosylase-like family protein [Source:TAIR;Acc:AT5G43780]	ath-miR395a,ath-miR395d,ath-miR395e
ath-miR395e	1.39664	1.20426	1.13531	0.353439	AT5G10180	1.00544	0.597682	0.0578026	0.00328046	AST68	slufate transporter 2;1 [Source:TAIR;Acc:AT5G10180]	ath-miR395e
ath-miR395a	1.39664	1.20426	1.13531	0.353439	AT4G23840	-0.188461	-0.169472	0.706122	0.514302	AT4G23840	Leucine-rich repeat (LRR) family protein [Source:TAIR;Acc:AT4G23840]	ath-miR395a,ath-miR395d,ath-miR395e,ath-miR867
ath-miR395a	1.39664	1.20426	1.13531	0.353439	AT2G28780	1.30591	0.328785	0.728506	0.58939	AT2G28780	unknown protein; INVOLVED IN: biological_process unknown; LOCATED IN: mitochondrion; EXPRESSED IN: inflorescence meristem, root, flower; EXPRESSED DURING: petal differentiation and expansion stage; CONTAINS InterPro DOMAIN/s: Protein of unknown func /.../UF939, bacterial (InterPro:IPR010343); BEST Arabidopsis thaliana protein match is: unknown protein (TAIR:AT3G09450.1); Has 671 Blast hits to 667…	ath-miR395a,ath-miR395d,ath-miR395e
ath-miR395a	1.39664	1.20426	1.13531	0.353439	AT1G20380	0.409503	0.148729	0.406863	0.445005	AT1G20380	Prolyl oligopeptidase family protein [Source:TAIR;Acc:AT1G20380]	ath-miR395a,ath-miR395d,ath-miR395e
ath-miR395a	1.39664	1.20426	1.13531	0.353439	AT3G44670	-0.432269	-0.277535	-0.323582	-0.459812	AT3G44670	Disease resistance protein (TIR-NBS-LRR class) family [Source:TAIR;Acc:AT3G44670]	ath-miR395a,ath-miR395d,ath-miR395e
ath-miR395a	1.39664	1.20426	1.13531	0.353439	AT1G56423	-0.509543	-0.189581	-0.38613	-0.388632	AT1G56423	unknown protein; FUNCTIONS IN: molecular_function unknown; INVOLVED IN: biological_process unknown; LOCATED IN: endomembrane system; Has 30201 Blast hits to 17322 proteins in 780 species: Archae - 12; Bacteria - 1396; Metazoa - 17338; Fungi - 3422; /.../ - 5037; Viruses - 0; Other Eukaryotes - 2996 (source: NCBI BLink). [Source:TAIR;Acc:AT1G56423]	ath-miR395a,ath-miR395d,ath-miR395e
ath-miR395a	1.39664	1.20426	1.13531	0.353439	AT4G14680	0.538632	0.138281	-0.905101	-0.808393	APS3	Pseudouridine synthase/archaeosine transglycosylase-like family protein [Source:TAIR;Acc:AT4G14680]	ath-miR395a,ath-miR395d,ath-miR395e
ath-miR395a	1.39664	1.20426	1.13531	0.353439	AT5G43780	0.980366	0.495247	-0.44859	-0.0135611	APS4	Pseudouridine synthase/archaeosine transglycosylase-like family protein [Source:TAIR;Acc:AT5G43780]	ath-miR395a,ath-miR395d,ath-miR395e
ath-miR395d	1.39664	1.20426	1.13531	0.353439	AT4G23840	-0.188461	-0.169472	0.706122	0.514302	AT4G23840	Leucine-rich repeat (LRR) family protein [Source:TAIR;Acc:AT4G23840]	ath-miR395a,ath-miR395d,ath-miR395e,ath-miR867
ath-miR395d	1.39664	1.20426	1.13531	0.353439	AT2G28780	1.30591	0.328785	0.728506	0.58939	AT2G28780	unknown protein; INVOLVED IN: biological_process unknown; LOCATED IN: mitochondrion; EXPRESSED IN: inflorescence meristem, root, flower; EXPRESSED DURING: petal differentiation and expansion stage; CONTAINS InterPro DOMAIN/s: Protein of unknown func /.../UF939, bacterial (InterPro:IPR010343); BEST Arabidopsis thaliana protein match is: unknown protein (TAIR:AT3G09450.1); Has 671 Blast hits to 667…	ath-miR395a,ath-miR395d,ath-miR395e
ath-miR395d	1.39664	1.20426	1.13531	0.353439	AT1G20380	0.409503	0.148729	0.406863	0.445005	AT1G20380	Prolyl oligopeptidase family protein [Source:TAIR;Acc:AT1G20380]	ath-miR395a,ath-miR395d,ath-miR395e
ath-miR395d	1.39664	1.20426	1.13531	0.353439	AT3G44670	-0.432269	-0.277535	-0.323582	-0.459812	AT3G44670	Disease resistance protein (TIR-NBS-LRR class) family [Source:TAIR;Acc:AT3G44670]	ath-miR395a,ath-miR395d,ath-miR395e
ath-miR395d	1.39664	1.20426	1.13531	0.353439	AT1G56423	-0.509543	-0.189581	-0.38613	-0.388632	AT1G56423	unknown protein; FUNCTIONS IN: molecular_function unknown; INVOLVED IN: biological_process unknown; LOCATED IN: endomembrane system; Has 30201 Blast hits to 17322 proteins in 780 species: Archae - 12; Bacteria - 1396; Metazoa - 17338; Fungi - 3422; /.../ - 5037; Viruses - 0; Other Eukaryotes - 2996 (source: NCBI BLink). [Source:TAIR;Acc:AT1G56423]	ath-miR395a,ath-miR395d,ath-miR395e
ath-miR395d	1.39664	1.20426	1.13531	0.353439	AT4G14680	0.538632	0.138281	-0.905101	-0.808393	APS3	Pseudouridine synthase/archaeosine transglycosylase-like family protein [Source:TAIR;Acc:AT4G14680]	ath-miR395a,ath-miR395d,ath-miR395e
ath-miR395d	1.39664	1.20426	1.13531	0.353439	AT5G43780	0.980366	0.495247	-0.44859	-0.0135611	APS4	Pseudouridine synthase/archaeosine transglycosylase-like family protein [Source:TAIR;Acc:AT5G43780]	ath-miR395a,ath-miR395d,ath-miR395e
ath-miR447a.2_3p	0.414604	0.802086	0.345492	0.657642	AT5G39330	1.56721	0.785093	0.591113	0.784595	AT5G39330	Protein of unknown function (DUF1163) [Source:TAIR;Acc:AT5G39330]	ath-miR447a.2_3p
ath-miR447a.2_3p	0.414604	0.802086	0.345492	0.657642	AT1G06770	-0.40556	-0.329996	0.140544	0.257521	DRIP1	DREB2A-interacting protein 1 [Source:TAIR;Acc:AT1G06770]	ath-miR447a.2_3p
ath-miR447a.2_3p	0.414604	0.802086	0.345492	0.657642	AT3G17970	0.415294	0.218926	0.329645	0.419649	atToc64-III	translocon at the outer membrane of chloroplasts 64-III [Source:TAIR;Acc:AT3G17970]	ath-miR447a.2_3p
ath-miR447a.2_3p	0.414604	0.802086	0.345492	0.657642	AT1G60960	0.832331	0.442068	0.443843	0.272864	IRT3	iron regulated transporter 3 [Source:TAIR;Acc:AT1G60960]	ath-miR447a.2_3p
ath-miR447a.2_3p	0.414604	0.802086	0.345492	0.657642	AT2G33350	-1.29592	-0.680778	-0.879894	-0.946799	AT2G33350	CCT motif family protein [Source:TAIR;Acc:AT2G33350]	ath-miR447a.2_3p
ath-miR447a.2_3p	0.414604	0.802086	0.345492	0.657642	AT1G31990	-1.06048	-0.860635	-0.621367	-0.672549	AT1G31990	unknown protein; Has 35333 Blast hits to 34131 proteins in 2444 species: Archae - 798; Bacteria - 22429; Metazoa - 974; Fungi - 991; Plants - 531; Viruses - 0; Other Eukaryotes - 9610 (source: NCBI BLink). [Source:TAIR;Acc:AT1G31990]	ath-miR447a.2_3p
ath-miR447a.2_3p	0.414604	0.802086	0.345492	0.657642	AT2G23760	-0.951625	-0.586428	-0.263369	-0.0343814	BLH4	BEL1-like homeodomain 4 [Source:TAIR;Acc:AT2G23760]	ath-miR447a.2_3p,ath-miR780.1
ath-miR447a.2_3p	0.414604	0.802086	0.345492	0.657642	AT2G28620	0.52504	0.302261	-0.398812	-0.345774	AT2G28620	P-loop containing nucleoside triphosphate hydrolases superfamily protein [Source:TAIR;Acc:AT2G28620]	ath-miR447a.2_3p
ath-miR846	0.594689	1.04516	-0.00885799	-0.14632	AT5G01950	0.105566	-0.0701484	0.218209	0.280551	AT5G01950	Leucine-rich repeat protein kinase family protein [Source:TAIR;Acc:AT5G01950]	ath-miR408,ath-miR846
ath-miR846	0.594689	1.04516	-0.00885799	-0.14632	AT1G01030	0.408073	0.317986	0.0833855	0.26683	NGA3	AP2/B3-like transcriptional factor family protein [Source:TAIR;Acc:AT1G01030]	ath-miR846
ath-miR846	0.594689	1.04516	-0.00885799	-0.14632	AT5G04260	0.0456255	0.25178	0.112214	0.147146	WCRKC2	WCRKC thioredoxin 2 [Source:TAIR;Acc:AT5G04260]	ath-miR846
ath-miR846	0.594689	1.04516	-0.00885799	-0.14632	AT1G70580	-0.996797	-0.410092	-1.27908	-1.4219	AOAT2	alanine-2-oxoglutarate aminotransferase 2 [Source:TAIR;Acc:AT1G70580]	ath-miR846
ath-miR846	0.594689	1.04516	-0.00885799	-0.14632	AT2G46210	-0.958418	-0.762131	-0.554387	-0.554045	AT2G46210	Fatty acid/sphingolipid desaturase [Source:TAIR;Acc:AT2G46210]	ath-miR846
ath-miR846	0.594689	1.04516	-0.00885799	-0.14632	AT5G49850	-1.04062	-0.603241	-0.30686	-0.394769	AT5G49850	Mannose-binding lectin superfamily protein [Source:TAIR;Acc:AT5G49850]	ath-miR846
ath-miR846	0.594689	1.04516	-0.00885799	-0.14632	AT1G52040	1.00378	0.729479	-0.402103	-0.0807801	MBP1	myrosinase-binding protein 1 [Source:TAIR;Acc:AT1G52040]	ath-miR169a,ath-miR846
ath-miR846	0.594689	1.04516	-0.00885799	-0.14632	AT1G79720	0.581831	0.295626	-0.152148	1.67901e-05	AT1G79720	Eukaryotic aspartyl protease family protein [Source:TAIR;Acc:AT1G79720]	ath-miR846
ath-miR159c	0.619225	0.936332	0.0178598	0.260327	AT4G31240	-0.395147	-0.244565	1.01334	0.756172	AT4G31240	protein kinase C-like zinc finger protein [Source:TAIR;Acc:AT4G31240]	ath-miR159a,ath-miR159c
ath-miR159c	0.619225	0.936332	0.0178598	0.260327	AT5G06100	-0.364462	-0.252275	0.27644	0.124493	MYB33	myb domain protein 33 [Source:TAIR;Acc:AT5G06100]	ath-miR159a,ath-miR159b,ath-miR159c
ath-miR159c	0.619225	0.936332	0.0178598	0.260327	AT2G20020	0.432028	0.269075	0.106472	0.0198428	CAF1	RNA-binding CRS1 / YhbY (CRM) domain-containing protein [Source:TAIR;Acc:AT2G20020]	ath-miR159a,ath-miR159c
ath-miR159c	0.619225	0.936332	0.0178598	0.260327	AT1G66360	-1.22734	-0.265191	-0.747147	-1.05888	AT1G66360	Calcium-dependent lipid-binding (CaLB domain) family protein [Source:TAIR;Acc:AT1G66360]	ath-miR159c
ath-miR159c	0.619225	0.936332	0.0178598	0.260327	AT5G59370	-1.16955	-0.73734	-0.656692	-1.03394	ACT4	actin 4 [Source:TAIR;Acc:AT5G59370]	ath-miR159c
ath-miR159c	0.619225	0.936332	0.0178598	0.260327	AT4G15530	-1.11896	-0.738236	-1.11302	-1.25856	PPDK	pyruvate orthophosphate dikinase [Source:TAIR;Acc:AT4G15530]	ath-miR159a,ath-miR159b,ath-miR159c
ath-miR159c	0.619225	0.936332	0.0178598	0.260327	AT3G60460	-1.15138	-0.716564	-0.787539	-0.81603	DUO1	myb-like HTH transcriptional regulator family protein [Source:TAIR;Acc:AT3G60460]	ath-miR159a,ath-miR159b,ath-miR159c
ath-miR159c	0.619225	0.936332	0.0178598	0.260327	AT4G26930	-0.972549	-0.712641	-0.495146	-0.0409764	MYB97	myb domain protein 97 [Source:TAIR;Acc:AT4G26930]	ath-miR159a,ath-miR159b,ath-miR159c,ath-miR858a
ath-miR159c	0.619225	0.936332	0.0178598	0.260327	AT2G32460	-1.05756	-0.785673	-0.247592	-0.105784	MYB101	myb domain protein 101 [Source:TAIR;Acc:AT2G32460]	ath-miR159a,ath-miR159b,ath-miR159c
ath-miR159c	0.619225	0.936332	0.0178598	0.260327	AT2G34010	-0.521085	-0.561695	-0.0961772	-0.489371	AT2G34010	unknown protein; BEST Arabidopsis thaliana protein match is: unknown protein (TAIR:AT1G29010.1); Has 32 Blast hits to 31 proteins in 9 species: Archae - 0; Bacteria - 0; Metazoa - 0; Fungi - 5; Plants - 25; Viruses - 0; Other Eukaryotes - 2 (source: /.../BLink). [Source:TAIR;Acc:AT2G34010]	ath-miR159a,ath-miR159b,ath-miR159c
ath-miR159c	0.619225	0.936332	0.0178598	0.260327	AT3G61740	-0.256529	-0.269613	-0.145348	-0.143925	SDG14	SET domain protein 14 [Source:TAIR;Acc:AT3G61740]	ath-miR159a,ath-miR159b,ath-miR159c
ath-miR159c	0.619225	0.936332	0.0178598	0.260327	AT5G37500	-0.601317	0.00111519	-0.729483	-0.423038	GORK	gated outwardly-rectifying K+ channel [Source:TAIR;Acc:AT5G37500]	ath-miR159c
ath-miR159c	0.619225	0.936332	0.0178598	0.260327	AT2G33240	-0.262509	-0.366828	-0.573019	-0.765722	XID	myosin XI D [Source:TAIR;Acc:AT2G33240]	ath-miR159c
ath-miR159c	0.619225	0.936332	0.0178598	0.260327	AT3G11440	-0.313293	-0.410965	-0.285783	-0.23939	ATMYB65	myb domain protein 65 [Source:TAIR;Acc:AT3G11440]	ath-miR159a,ath-miR159b,ath-miR159c,ath-miR858a,ath-miR858b
ath-miR159c	0.619225	0.936332	0.0178598	0.260327	AT2G29570	0.32909	0.0414481	-0.155264	-0.151981	PCNA2	proliferating cell nuclear antigen 2 [Source:TAIR;Acc:AT2G29570]	ath-miR159c,ath-miR319a,ath-miR319b,ath-miR319c
ath-miR159c	0.619225	0.936332	0.0178598	0.260327	AT2G35570	0.856461	0.0202705	-0.0670212	-0.104733	AT2G35570	pseudogene, serpin (serine protease inhibitor) family, similar to phloem serpin-1 (Cucurbita maxima) GI:9937311; blastp match of 49% identity and 9.9e-85 P-value to GP [Source:TAIR;Acc:AT2G35570]	ath-miR159c
ath-miR159a	0.61913	0.936232	0.0202757	0.260298	AT1G59830	-0.230457	-0.0851426	0.504587	0.553237	PP2A-1	protein phosphatase 2A-2 [Source:TAIR;Acc:AT1G59830]	ath-miR159a,ath-miR159b
ath-miR159a	0.61913	0.936232	0.0202757	0.260298	AT4G31240	-0.395147	-0.244565	1.01334	0.756172	AT4G31240	protein kinase C-like zinc finger protein [Source:TAIR;Acc:AT4G31240]	ath-miR159a,ath-miR159c
ath-miR159a	0.61913	0.936232	0.0202757	0.260298	AT3G25990	-0.2188	-0.1635	0.238243	0.0823851	GT-4	Homeodomain-like superfamily protein [Source:TAIR;Acc:AT3G25990]	ath-miR159a,ath-miR159b
ath-miR159a	0.61913	0.936232	0.0202757	0.260298	AT5G06100	-0.364462	-0.252275	0.27644	0.124493	MYB33	myb domain protein 33 [Source:TAIR;Acc:AT5G06100]	ath-miR159a,ath-miR159b,ath-miR159c
ath-miR159a	0.61913	0.936232	0.0202757	0.260298	AT5G59790	0.0341301	-0.251547	0.324254	0.22789	AT5G59790	Domain of unknown function (DUF966) [Source:TAIR;Acc:AT5G59790]	ath-miR159a,ath-miR159b
ath-miR159a	0.61913	0.936232	0.0202757	0.260298	AT2G20020	0.432028	0.269075	0.106472	0.0198428	CAF1	RNA-binding CRS1 / YhbY (CRM) domain-containing protein [Source:TAIR;Acc:AT2G20020]	ath-miR159a,ath-miR159c
ath-miR159a	0.61913	0.936232	0.0202757	0.260298	AT1G29010	-1.93453	-0.73719	-0.954677	-1.82788	AT1G29010	unknown protein; BEST Arabidopsis thaliana protein match is: unknown protein (TAIR:AT2G34010.1); Has 18 Blast hits to 17 proteins in 3 species: Archae - 0; Bacteria - 0; Metazoa - 0; Fungi - 0; Plants - 18; Viruses - 0; Other Eukaryotes - 0 (source: /.../BLink). [Source:TAIR;Acc:AT1G29010]	ath-miR159a,ath-miR159b
ath-miR159a	0.61913	0.936232	0.0202757	0.260298	AT2G04490	-0.966583	-0.653593	-0.544268	-0.769282	AT2G04490	transposable element gene [Source:TAIR;Acc:AT2G04490]	ath-miR159a,ath-miR159b,ath-miR780.2
ath-miR159a	0.61913	0.936232	0.0202757	0.260298	AT4G15530	-1.11896	-0.738236	-1.11302	-1.25856	PPDK	pyruvate orthophosphate dikinase [Source:TAIR;Acc:AT4G15530]	ath-miR159a,ath-miR159b,ath-miR159c
ath-miR159a	0.61913	0.936232	0.0202757	0.260298	AT3G60460	-1.15138	-0.716564	-0.787539	-0.81603	DUO1	myb-like HTH transcriptional regulator family protein [Source:TAIR;Acc:AT3G60460]	ath-miR159a,ath-miR159b,ath-miR159c
ath-miR159a	0.61913	0.936232	0.0202757	0.260298	AT5G55930	-0.825452	-0.643883	-0.418815	-0.160997	ATOPT1	oligopeptide transporter 1 [Source:TAIR;Acc:AT5G55930]	ath-miR159a,ath-miR159b
ath-miR159a	0.61913	0.936232	0.0202757	0.260298	AT4G26930	-0.972549	-0.712641	-0.495146	-0.0409764	MYB97	myb domain protein 97 [Source:TAIR;Acc:AT4G26930]	ath-miR159a,ath-miR159b,ath-miR159c,ath-miR858a
ath-miR159a	0.61913	0.936232	0.0202757	0.260298	AT2G32460	-1.05756	-0.785673	-0.247592	-0.105784	MYB101	myb domain protein 101 [Source:TAIR;Acc:AT2G32460]	ath-miR159a,ath-miR159b,ath-miR159c
ath-miR159a	0.61913	0.936232	0.0202757	0.260298	AT2G34010	-0.521085	-0.561695	-0.0961772	-0.489371	AT2G34010	unknown protein; BEST Arabidopsis thaliana protein match is: unknown protein (TAIR:AT1G29010.1); Has 32 Blast hits to 31 proteins in 9 species: Archae - 0; Bacteria - 0; Metazoa - 0; Fungi - 5; Plants - 25; Viruses - 0; Other Eukaryotes - 2 (source: /.../BLink). [Source:TAIR;Acc:AT2G34010]	ath-miR159a,ath-miR159b,ath-miR159c
ath-miR159a	0.61913	0.936232	0.0202757	0.260298	AT3G61740	-0.256529	-0.269613	-0.145348	-0.143925	SDG14	SET domain protein 14 [Source:TAIR;Acc:AT3G61740]	ath-miR159a,ath-miR159b,ath-miR159c
ath-miR159a	0.61913	0.936232	0.0202757	0.260298	AT1G06740	-0.382985	-0.491643	-0.265358	-0.489213	AT1G06740	transposable element gene [Source:TAIR;Acc:AT1G06740]	ath-miR159a,ath-miR159b
ath-miR159a	0.61913	0.936232	0.0202757	0.260298	AT1G55760	-0.377769	-0.134141	-0.516174	-0.277983	AT1G55760	BTB/POZ domain-containing protein [Source:TAIR;Acc:AT1G55760]	ath-miR159a
ath-miR159a	0.61913	0.936232	0.0202757	0.260298	AT3G11440	-0.313293	-0.410965	-0.285783	-0.23939	ATMYB65	myb domain protein 65 [Source:TAIR;Acc:AT3G11440]	ath-miR159a,ath-miR159b,ath-miR159c,ath-miR858a,ath-miR858b
ath-miR159a	0.61913	0.936232	0.0202757	0.260298	AT5G67090	0.986529	0.716857	-0.147215	-0.216272	AT5G67090	Subtilisin-like serine endopeptidase family protein [Source:TAIR;Acc:AT5G67090]	ath-miR159a,ath-miR159b,ath-miR319a,ath-miR319b
ath-miR159a	0.61913	0.936232	0.0202757	0.260298	AT2G46890	0.885069	0.396001	-0.0579909	0.011856	AT2G46890	Protein of unknown function (DUF1295) [Source:TAIR;Acc:AT2G46890]	ath-miR159a,ath-miR159b
ath-miR159b	0.619124	0.936225	0.0202757	0.260298	AT2G30600	0.510123	-0.258918	1.94121	2.26868	AT2G30600	BTB/POZ domain-containing protein [Source:TAIR;Acc:AT2G30600]	ath-miR159b
ath-miR159b	0.619124	0.936225	0.0202757	0.260298	AT1G59830	-0.230457	-0.0851426	0.504587	0.553237	PP2A-1	protein phosphatase 2A-2 [Source:TAIR;Acc:AT1G59830]	ath-miR159a,ath-miR159b
ath-miR159b	0.619124	0.936225	0.0202757	0.260298	AT3G25990	-0.2188	-0.1635	0.238243	0.0823851	GT-4	Homeodomain-like superfamily protein [Source:TAIR;Acc:AT3G25990]	ath-miR159a,ath-miR159b
ath-miR159b	0.619124	0.936225	0.0202757	0.260298	AT5G06100	-0.364462	-0.252275	0.27644	0.124493	MYB33	myb domain protein 33 [Source:TAIR;Acc:AT5G06100]	ath-miR159a,ath-miR159b,ath-miR159c
ath-miR159b	0.619124	0.936225	0.0202757	0.260298	AT5G59790	0.0341301	-0.251547	0.324254	0.22789	AT5G59790	Domain of unknown function (DUF966) [Source:TAIR;Acc:AT5G59790]	ath-miR159a,ath-miR159b
ath-miR159b	0.619124	0.936225	0.0202757	0.260298	AT1G50700	0.389317	0.283258	0.0744665	0.0632988	CPK33	calcium-dependent protein kinase 33 [Source:TAIR;Acc:AT1G50700]	ath-miR159b
ath-miR159b	0.619124	0.936225	0.0202757	0.260298	AT1G29010	-1.93453	-0.73719	-0.954677	-1.82788	AT1G29010	unknown protein; BEST Arabidopsis thaliana protein match is: unknown protein (TAIR:AT2G34010.1); Has 18 Blast hits to 17 proteins in 3 species: Archae - 0; Bacteria - 0; Metazoa - 0; Fungi - 0; Plants - 18; Viruses - 0; Other Eukaryotes - 0 (source: /.../BLink). [Source:TAIR;Acc:AT1G29010]	ath-miR159a,ath-miR159b
ath-miR159b	0.619124	0.936225	0.0202757	0.260298	AT2G04490	-0.966583	-0.653593	-0.544268	-0.769282	AT2G04490	transposable element gene [Source:TAIR;Acc:AT2G04490]	ath-miR159a,ath-miR159b,ath-miR780.2
ath-miR159b	0.619124	0.936225	0.0202757	0.260298	AT4G15530	-1.11896	-0.738236	-1.11302	-1.25856	PPDK	pyruvate orthophosphate dikinase [Source:TAIR;Acc:AT4G15530]	ath-miR159a,ath-miR159b,ath-miR159c
ath-miR159b	0.619124	0.936225	0.0202757	0.260298	AT3G60460	-1.15138	-0.716564	-0.787539	-0.81603	DUO1	myb-like HTH transcriptional regulator family protein [Source:TAIR;Acc:AT3G60460]	ath-miR159a,ath-miR159b,ath-miR159c
ath-miR159b	0.619124	0.936225	0.0202757	0.260298	AT4G36770	-1.62441	-0.971047	-0.185166	-0.191267	UGT72C1	UDP-Glycosyltransferase superfamily protein [Source:TAIR;Acc:AT4G36770]	ath-miR159b
ath-miR159b	0.619124	0.936225	0.0202757	0.260298	AT3G56920	-0.972493	-0.729623	-0.517944	-0.589233	AT3G56920	DHHC-type zinc finger family protein [Source:TAIR;Acc:AT3G56920]	ath-miR159b
ath-miR159b	0.619124	0.936225	0.0202757	0.260298	AT3G22040	-1.14143	-0.509829	-0.437112	-0.488474	CRRSP34	Domain of unknown function (DUF26) [Source:TAIR;Acc:AT3G22040]	ath-miR159b
ath-miR159b	0.619124	0.936225	0.0202757	0.260298	AT5G55930	-0.825452	-0.643883	-0.418815	-0.160997	ATOPT1	oligopeptide transporter 1 [Source:TAIR;Acc:AT5G55930]	ath-miR159a,ath-miR159b
ath-miR159b	0.619124	0.936225	0.0202757	0.260298	AT4G26930	-0.972549	-0.712641	-0.495146	-0.0409764	MYB97	myb domain protein 97 [Source:TAIR;Acc:AT4G26930]	ath-miR159a,ath-miR159b,ath-miR159c,ath-miR858a
ath-miR159b	0.619124	0.936225	0.0202757	0.260298	AT2G32460	-1.05756	-0.785673	-0.247592	-0.105784	MYB101	myb domain protein 101 [Source:TAIR;Acc:AT2G32460]	ath-miR159a,ath-miR159b,ath-miR159c
ath-miR159b	0.619124	0.936225	0.0202757	0.260298	AT2G34010	-0.521085	-0.561695	-0.0961772	-0.489371	AT2G34010	unknown protein; BEST Arabidopsis thaliana protein match is: unknown protein (TAIR:AT1G29010.1); Has 32 Blast hits to 31 proteins in 9 species: Archae - 0; Bacteria - 0; Metazoa - 0; Fungi - 5; Plants - 25; Viruses - 0; Other Eukaryotes - 2 (source: /.../BLink). [Source:TAIR;Acc:AT2G34010]	ath-miR159a,ath-miR159b,ath-miR159c
ath-miR159b	0.619124	0.936225	0.0202757	0.260298	AT3G61740	-0.256529	-0.269613	-0.145348	-0.143925	SDG14	SET domain protein 14 [Source:TAIR;Acc:AT3G61740]	ath-miR159a,ath-miR159b,ath-miR159c
ath-miR159b	0.619124	0.936225	0.0202757	0.260298	AT3G25570	-0.733594	-0.334253	-0.815465	-0.662265	AT3G25570	Adenosylmethionine decarboxylase family protein [Source:TAIR;Acc:AT3G25570]	ath-miR159b
ath-miR159b	0.619124	0.936225	0.0202757	0.260298	AT1G06740	-0.382985	-0.491643	-0.265358	-0.489213	AT1G06740	transposable element gene [Source:TAIR;Acc:AT1G06740]	ath-miR159a,ath-miR159b
ath-miR159b	0.619124	0.936225	0.0202757	0.260298	AT3G11440	-0.313293	-0.410965	-0.285783	-0.23939	ATMYB65	myb domain protein 65 [Source:TAIR;Acc:AT3G11440]	ath-miR159a,ath-miR159b,ath-miR159c,ath-miR858a,ath-miR858b
ath-miR159b	0.619124	0.936225	0.0202757	0.260298	AT5G17770	0.186989	0.177139	-0.280992	-0.166267	ATCBR	NADH:cytochrome B5 reductase 1 [Source:TAIR;Acc:AT5G17770]	ath-miR159b
ath-miR159b	0.619124	0.936225	0.0202757	0.260298	AT5G67090	0.986529	0.716857	-0.147215	-0.216272	AT5G67090	Subtilisin-like serine endopeptidase family protein [Source:TAIR;Acc:AT5G67090]	ath-miR159a,ath-miR159b,ath-miR319a,ath-miR319b
ath-miR159b	0.619124	0.936225	0.0202757	0.260298	AT2G46890	0.885069	0.396001	-0.0579909	0.011856	AT2G46890	Protein of unknown function (DUF1295) [Source:TAIR;Acc:AT2G46890]	ath-miR159a,ath-miR159b
ath-miR157c	1.21009	0.515528	0.701055	0.206351	AT2G15890	0.346601	-0.134992	3.41776	3.78252	MEE14	maternal effect embryo arrest 14 [Source:TAIR;Acc:AT2G15890]	ath-miR157a,ath-miR157b,ath-miR157c
ath-miR157c	1.21009	0.515528	0.701055	0.206351	AT5G18590	0.158	0.00527448	0.614346	0.702412	AT5G18590	Galactose oxidase/kelch repeat superfamily protein [Source:TAIR;Acc:AT5G18590]	ath-miR157a,ath-miR157b,ath-miR157c,ath-miR157d
ath-miR157c	1.21009	0.515528	0.701055	0.206351	AT2G33810	-0.0347446	-0.00754771	0.480061	0.641571	SPL3	squamosa promoter binding protein-like 3 [Source:TAIR;Acc:AT2G33810]	ath-miR157a,ath-miR157b,ath-miR157c,ath-miR157d
ath-miR157c	1.21009	0.515528	0.701055	0.206351	AT1G80180	-0.394296	-0.451817	1.30983	1.14304	AT1G80180	unknown protein; FUNCTIONS IN: molecular_function unknown; INVOLVED IN: biological_process unknown; LOCATED IN: plasma membrane; EXPRESSED IN: 21 plant structures; EXPRESSED DURING: 10 growth stages; BEST Arabidopsis thaliana protein match is: unkno /.../tein (TAIR:AT1G15400.3); Has 30201 Blast hits to 17322 proteins in 780 species: Archae - 12; Bacteria - 1396; Metazoa - 17338; Fungi - 3422; Pla…	ath-miR157c
ath-miR157c	1.21009	0.515528	0.701055	0.206351	AT1G58190	-0.112492	-0.220986	1.29269	1.24236	RLP9	receptor like protein 9 [Source:TAIR;Acc:AT1G58190]	ath-miR157a,ath-miR157b,ath-miR157c
ath-miR157c	1.21009	0.515528	0.701055	0.206351	AT1G54660	0.934106	0.170331	0.558263	0.725679	AT1G54660	pseudogene, similar to vetispiradiene synthase, blastp match of 54% identity and 3.0e-79 P-value to GP [Source:TAIR;Acc:AT1G54660]	ath-miR157c
ath-miR157c	1.21009	0.515528	0.701055	0.206351	AT5G21150	-0.177409	-0.25083	0.621095	0.282923	AGO9	Argonaute family protein [Source:TAIR;Acc:AT5G21150]	ath-miR157a,ath-miR157b,ath-miR157c
ath-miR157c	1.21009	0.515528	0.701055	0.206351	AT1G69170	-0.253784	-0.242498	0.0628383	0.19648	SPL6	Squamosa promoter-binding protein-like (SBP domain) transcription factor family protein [Source:TAIR;Acc:AT1G69170]	ath-miR157a,ath-miR157b,ath-miR157c,ath-miR157d
ath-miR157c	1.21009	0.515528	0.701055	0.206351	AT5G58720	-0.400322	-0.306518	0.22519	0.12035	AT5G58720	smr (Small MutS Related) domain-containing protein [Source:TAIR;Acc:AT5G58720]	ath-miR157c
ath-miR157c	1.21009	0.515528	0.701055	0.206351	AT2G27590	0.12281	-0.0600029	0.244353	0.192766	AT2G27590	S-adenosyl-L-methionine-dependent methyltransferases superfamily protein [Source:TAIR;Acc:AT2G27590]	ath-miR157a,ath-miR157b,ath-miR157c
ath-miR157c	1.21009	0.515528	0.701055	0.206351	AT3G49050	0.410865	0.286469	0.286882	0.374799	AT3G49050	alpha/beta-Hydrolases superfamily protein [Source:TAIR;Acc:AT3G49050]	ath-miR157a,ath-miR157b,ath-miR157c
ath-miR157c	1.21009	0.515528	0.701055	0.206351	AT4G36860	0.413838	0.294118	0.171715	0.237898	DAR1	LIM domain-containing protein [Source:TAIR;Acc:AT4G36860]	ath-miR157a,ath-miR157b,ath-miR157c,ath-miR447a_3p,ath-miR447b
ath-miR157c	1.21009	0.515528	0.701055	0.206351	AT1G62010	0.411021	0.194598	-0.111177	-0.0633658	AT1G62010	Mitochondrial transcription termination factor family protein [Source:TAIR;Acc:AT1G62010]	ath-miR157a,ath-miR157b,ath-miR157c
ath-miR157c	1.21009	0.515528	0.701055	0.206351	AT3G20320	0.377511	0.224751	-0.0978005	0.0788957	TGD2	trigalactosyldiacylglycerol2 [Source:TAIR;Acc:AT3G20320]	ath-miR157a,ath-miR157b,ath-miR157c
ath-miR157c	1.21009	0.515528	0.701055	0.206351	AT1G53160	0.601921	0.409655	0.404179	0.288495	SPL4	squamosa promoter binding protein-like 4 [Source:TAIR;Acc:AT1G53160]	ath-miR157a,ath-miR157b,ath-miR157c,ath-miR157d
ath-miR157c	1.21009	0.515528	0.701055	0.206351	AT1G75640	0.597675	0.19753	0.434463	0.380179	AT1G75640	Leucine-rich receptor-like protein kinase family protein [Source:TAIR;Acc:AT1G75640]	ath-miR157c
ath-miR157c	1.21009	0.515528	0.701055	0.206351	AT4G34410	-3.86339	-1.58866	0.883472	0.399953	RRTF1	redox responsive transcription factor 1 [Source:TAIR;Acc:AT4G34410]	ath-miR157c
ath-miR157c	1.21009	0.515528	0.701055	0.206351	AT5G50570	-1.52516	-0.891344	-0.244063	-0.351224	SPL13A	Squamosa promoter-binding protein-like (SBP domain) transcription factor family protein [Source:TAIR;Acc:AT5G50570]	ath-miR157a,ath-miR157b,ath-miR157c,ath-miR157d
ath-miR157c	1.21009	0.515528	0.701055	0.206351	AT2G25600	-1.05417	-0.760464	-0.475239	-0.564225	SPIK	Shaker pollen inward K+ channel [Source:TAIR;Acc:AT2G25600]	ath-miR157a,ath-miR157b,ath-miR157c
ath-miR157c	1.21009	0.515528	0.701055	0.206351	AT4G21120	-0.929123	-0.500277	-0.0913067	-0.543501	AAT1	amino acid transporter 1 [Source:TAIR;Acc:AT4G21120]	ath-miR157a,ath-miR157b,ath-miR157c,ath-miR157d
ath-miR157c	1.21009	0.515528	0.701055	0.206351	AT4G19191	-0.525957	-0.342104	0.307944	-0.421743	PCMP-E1	Tetratricopeptide repeat (TPR)-like superfamily protein [Source:TAIR;Acc:AT4G19191]	ath-miR157a,ath-miR157b,ath-miR157c
ath-miR157c	1.21009	0.515528	0.701055	0.206351	AT3G15270	-0.213624	-0.348143	-0.45013	0.293647	SPL5	squamosa promoter binding protein-like 5 [Source:TAIR;Acc:AT3G15270]	ath-miR157a,ath-miR157b,ath-miR157c,ath-miR157d
ath-miR157c	1.21009	0.515528	0.701055	0.206351	AT4G30470	-0.820351	-0.512084	-0.820643	-0.916672	AT4G30470	NAD(P)-binding Rossmann-fold superfamily protein [Source:TAIR;Acc:AT4G30470]	ath-miR157a,ath-miR157b,ath-miR157c
ath-miR157c	1.21009	0.515528	0.701055	0.206351	AT1G27370	-0.602952	-0.425537	-0.765226	-0.545464	SPL10	squamosa promoter binding protein-like 10 [Source:TAIR;Acc:AT1G27370]	ath-miR157a,ath-miR157b,ath-miR157c,ath-miR157d
ath-miR157c	1.21009	0.515528	0.701055	0.206351	AT3G57920	-0.721323	-0.498673	-0.664575	-0.623209	SPL15	squamosa promoter binding protein-like 15 [Source:TAIR;Acc:AT3G57920]	ath-miR157a,ath-miR157b,ath-miR157c,ath-miR157d
ath-miR157c	1.21009	0.515528	0.701055	0.206351	AT2G04170	-0.947116	-0.092162	-0.432769	-0.471706	AT2G04170	TRAF-like family protein [Source:TAIR;Acc:AT2G04170]	ath-miR157c
ath-miR157c	1.21009	0.515528	0.701055	0.206351	AT2G42200	-0.702407	-0.131236	-0.424978	-0.281284	SPL9	squamosa promoter binding protein-like 9 [Source:TAIR;Acc:AT2G42200]	ath-miR157a,ath-miR157b,ath-miR157c,ath-miR157d
ath-miR157c	1.21009	0.515528	0.701055	0.206351	AT1G27360	-0.455174	-0.173964	-0.412225	-0.380638	SPL11	squamosa promoter-like 11 [Source:TAIR;Acc:AT1G27360]	ath-miR157a,ath-miR157b,ath-miR157c,ath-miR157d
ath-miR157c	1.21009	0.515528	0.701055	0.206351	AT2G17220	-0.379939	-0.3369	-0.272409	-0.273315	AT2G17220	Protein kinase superfamily protein [Source:TAIR;Acc:AT2G17220]	ath-miR157a,ath-miR157b,ath-miR157c
ath-miR157c	1.21009	0.515528	0.701055	0.206351	AT3G05165	-0.032048	-0.081693	-0.505954	-0.445762	AT3G05165	Major facilitator superfamily protein [Source:TAIR;Acc:AT3G05165]	ath-miR157a,ath-miR157b,ath-miR157c,ath-miR157d
ath-miR157c	1.21009	0.515528	0.701055	0.206351	AT4G28660	0.132011	0.116218	-0.969853	-1.08312	PSB28	photosystem II reaction center PSB28 protein [Source:TAIR;Acc:AT4G28660]	ath-miR157a,ath-miR157b,ath-miR157c
ath-miR157c	1.21009	0.515528	0.701055	0.206351	AT5G43270	0.277027	0.205489	-0.620921	-0.235684	SPL2	squamosa promoter binding protein-like 2 [Source:TAIR;Acc:AT5G43270]	ath-miR157a,ath-miR157b,ath-miR157c,ath-miR157d
ath-miR157c	1.21009	0.515528	0.701055	0.206351	AT1G71400	1.16195	0.0595853	0.0386876	-0.235341	AtRLP12	receptor like protein 12 [Source:TAIR;Acc:AT1G71400]	ath-miR157a,ath-miR157b,ath-miR157c,ath-miR157d
ath-miR157a	1.21009	0.515528	0.701055	0.206351	AT2G15890	0.346601	-0.134992	3.41776	3.78252	MEE14	maternal effect embryo arrest 14 [Source:TAIR;Acc:AT2G15890]	ath-miR157a,ath-miR157b,ath-miR157c
ath-miR157a	1.21009	0.515528	0.701055	0.206351	AT5G18590	0.158	0.00527448	0.614346	0.702412	AT5G18590	Galactose oxidase/kelch repeat superfamily protein [Source:TAIR;Acc:AT5G18590]	ath-miR157a,ath-miR157b,ath-miR157c,ath-miR157d
ath-miR157a	1.21009	0.515528	0.701055	0.206351	AT2G33810	-0.0347446	-0.00754771	0.480061	0.641571	SPL3	squamosa promoter binding protein-like 3 [Source:TAIR;Acc:AT2G33810]	ath-miR157a,ath-miR157b,ath-miR157c,ath-miR157d
ath-miR157a	1.21009	0.515528	0.701055	0.206351	AT1G58190	-0.112492	-0.220986	1.29269	1.24236	RLP9	receptor like protein 9 [Source:TAIR;Acc:AT1G58190]	ath-miR157a,ath-miR157b,ath-miR157c
ath-miR157a	1.21009	0.515528	0.701055	0.206351	AT5G21150	-0.177409	-0.25083	0.621095	0.282923	AGO9	Argonaute family protein [Source:TAIR;Acc:AT5G21150]	ath-miR157a,ath-miR157b,ath-miR157c
ath-miR157a	1.21009	0.515528	0.701055	0.206351	AT5G23610	-0.247481	-0.272401	0.334282	0.221453	AT5G23610	BEST Arabidopsis thaliana protein match is: SWITCH1 (TAIR:AT5G51330.1); Has 170 Blast hits to 162 proteins in 36 species: Archae - 3; Bacteria - 6; Metazoa - 6; Fungi - 4; Plants - 117; Viruses - 0; Other Eukaryotes - 34 (source: NCBI BLink). [Source:TAIR;Acc:AT5G23610]	ath-miR157a,ath-miR157b
ath-miR157a	1.21009	0.515528	0.701055	0.206351	AT1G69170	-0.253784	-0.242498	0.0628383	0.19648	SPL6	Squamosa promoter-binding protein-like (SBP domain) transcription factor family protein [Source:TAIR;Acc:AT1G69170]	ath-miR157a,ath-miR157b,ath-miR157c,ath-miR157d
ath-miR157a	1.21009	0.515528	0.701055	0.206351	AT1G61620	-0.0454464	0.0040875	0.470193	0.372149	AT1G61620	phosphoinositide binding [Source:TAIR;Acc:AT1G61620]	ath-miR157a,ath-miR157b
ath-miR157a	1.21009	0.515528	0.701055	0.206351	AT2G27590	0.12281	-0.0600029	0.244353	0.192766	AT2G27590	S-adenosyl-L-methionine-dependent methyltransferases superfamily protein [Source:TAIR;Acc:AT2G27590]	ath-miR157a,ath-miR157b,ath-miR157c
ath-miR157a	1.21009	0.515528	0.701055	0.206351	AT3G49050	0.410865	0.286469	0.286882	0.374799	AT3G49050	alpha/beta-Hydrolases superfamily protein [Source:TAIR;Acc:AT3G49050]	ath-miR157a,ath-miR157b,ath-miR157c
ath-miR157a	1.21009	0.515528	0.701055	0.206351	AT4G36860	0.413838	0.294118	0.171715	0.237898	DAR1	LIM domain-containing protein [Source:TAIR;Acc:AT4G36860]	ath-miR157a,ath-miR157b,ath-miR157c,ath-miR447a_3p,ath-miR447b
ath-miR157a	1.21009	0.515528	0.701055	0.206351	AT1G12460	0.280138	0.235259	0.103924	0.266391	AT1G12460	Leucine-rich repeat protein kinase family protein [Source:TAIR;Acc:AT1G12460]	ath-miR157a,ath-miR157b
ath-miR157a	1.21009	0.515528	0.701055	0.206351	AT1G62010	0.411021	0.194598	-0.111177	-0.0633658	AT1G62010	Mitochondrial transcription termination factor family protein [Source:TAIR;Acc:AT1G62010]	ath-miR157a,ath-miR157b,ath-miR157c
ath-miR157a	1.21009	0.515528	0.701055	0.206351	AT3G20320	0.377511	0.224751	-0.0978005	0.0788957	TGD2	trigalactosyldiacylglycerol2 [Source:TAIR;Acc:AT3G20320]	ath-miR157a,ath-miR157b,ath-miR157c
ath-miR157a	1.21009	0.515528	0.701055	0.206351	AT1G53160	0.601921	0.409655	0.404179	0.288495	SPL4	squamosa promoter binding protein-like 4 [Source:TAIR;Acc:AT1G53160]	ath-miR157a,ath-miR157b,ath-miR157c,ath-miR157d
ath-miR157a	1.21009	0.515528	0.701055	0.206351	AT5G50570	-1.52516	-0.891344	-0.244063	-0.351224	SPL13A	Squamosa promoter-binding protein-like (SBP domain) transcription factor family protein [Source:TAIR;Acc:AT5G50570]	ath-miR157a,ath-miR157b,ath-miR157c,ath-miR157d
ath-miR157a	1.21009	0.515528	0.701055	0.206351	AT2G25600	-1.05417	-0.760464	-0.475239	-0.564225	SPIK	Shaker pollen inward K+ channel [Source:TAIR;Acc:AT2G25600]	ath-miR157a,ath-miR157b,ath-miR157c
ath-miR157a	1.21009	0.515528	0.701055	0.206351	AT4G21120	-0.929123	-0.500277	-0.0913067	-0.543501	AAT1	amino acid transporter 1 [Source:TAIR;Acc:AT4G21120]	ath-miR157a,ath-miR157b,ath-miR157c,ath-miR157d
ath-miR157a	1.21009	0.515528	0.701055	0.206351	AT4G19191	-0.525957	-0.342104	0.307944	-0.421743	PCMP-E1	Tetratricopeptide repeat (TPR)-like superfamily protein [Source:TAIR;Acc:AT4G19191]	ath-miR157a,ath-miR157b,ath-miR157c
ath-miR157a	1.21009	0.515528	0.701055	0.206351	AT3G15270	-0.213624	-0.348143	-0.45013	0.293647	SPL5	squamosa promoter binding protein-like 5 [Source:TAIR;Acc:AT3G15270]	ath-miR157a,ath-miR157b,ath-miR157c,ath-miR157d
ath-miR157a	1.21009	0.515528	0.701055	0.206351	AT4G30470	-0.820351	-0.512084	-0.820643	-0.916672	AT4G30470	NAD(P)-binding Rossmann-fold superfamily protein [Source:TAIR;Acc:AT4G30470]	ath-miR157a,ath-miR157b,ath-miR157c
ath-miR157a	1.21009	0.515528	0.701055	0.206351	AT1G27370	-0.602952	-0.425537	-0.765226	-0.545464	SPL10	squamosa promoter binding protein-like 10 [Source:TAIR;Acc:AT1G27370]	ath-miR157a,ath-miR157b,ath-miR157c,ath-miR157d
ath-miR157a	1.21009	0.515528	0.701055	0.206351	AT3G57920	-0.721323	-0.498673	-0.664575	-0.623209	SPL15	squamosa promoter binding protein-like 15 [Source:TAIR;Acc:AT3G57920]	ath-miR157a,ath-miR157b,ath-miR157c,ath-miR157d
ath-miR157a	1.21009	0.515528	0.701055	0.206351	AT2G42200	-0.702407	-0.131236	-0.424978	-0.281284	SPL9	squamosa promoter binding protein-like 9 [Source:TAIR;Acc:AT2G42200]	ath-miR157a,ath-miR157b,ath-miR157c,ath-miR157d
ath-miR157a	1.21009	0.515528	0.701055	0.206351	AT1G27360	-0.455174	-0.173964	-0.412225	-0.380638	SPL11	squamosa promoter-like 11 [Source:TAIR;Acc:AT1G27360]	ath-miR157a,ath-miR157b,ath-miR157c,ath-miR157d
ath-miR157a	1.21009	0.515528	0.701055	0.206351	AT2G17220	-0.379939	-0.3369	-0.272409	-0.273315	AT2G17220	Protein kinase superfamily protein [Source:TAIR;Acc:AT2G17220]	ath-miR157a,ath-miR157b,ath-miR157c
ath-miR157a	1.21009	0.515528	0.701055	0.206351	AT2G43710	-0.235477	-0.0697872	-0.584335	-0.502955	SSI2	Plant stearoyl-acyl-carrier-protein desaturase family protein [Source:TAIR;Acc:AT2G43710]	ath-miR157a,ath-miR157b
ath-miR157a	1.21009	0.515528	0.701055	0.206351	AT3G05165	-0.032048	-0.081693	-0.505954	-0.445762	AT3G05165	Major facilitator superfamily protein [Source:TAIR;Acc:AT3G05165]	ath-miR157a,ath-miR157b,ath-miR157c,ath-miR157d
ath-miR157a	1.21009	0.515528	0.701055	0.206351	AT4G28660	0.132011	0.116218	-0.969853	-1.08312	PSB28	photosystem II reaction center PSB28 protein [Source:TAIR;Acc:AT4G28660]	ath-miR157a,ath-miR157b,ath-miR157c
ath-miR157a	1.21009	0.515528	0.701055	0.206351	AT5G43270	0.277027	0.205489	-0.620921	-0.235684	SPL2	squamosa promoter binding protein-like 2 [Source:TAIR;Acc:AT5G43270]	ath-miR157a,ath-miR157b,ath-miR157c,ath-miR157d
ath-miR157a	1.21009	0.515528	0.701055	0.206351	AT1G71400	1.16195	0.0595853	0.0386876	-0.235341	AtRLP12	receptor like protein 12 [Source:TAIR;Acc:AT1G71400]	ath-miR157a,ath-miR157b,ath-miR157c,ath-miR157d
ath-miR157b	1.21009	0.515528	0.701055	0.206351	AT2G15890	0.346601	-0.134992	3.41776	3.78252	MEE14	maternal effect embryo arrest 14 [Source:TAIR;Acc:AT2G15890]	ath-miR157a,ath-miR157b,ath-miR157c
ath-miR157b	1.21009	0.515528	0.701055	0.206351	AT5G18590	0.158	0.00527448	0.614346	0.702412	AT5G18590	Galactose oxidase/kelch repeat superfamily protein [Source:TAIR;Acc:AT5G18590]	ath-miR157a,ath-miR157b,ath-miR157c,ath-miR157d
ath-miR157b	1.21009	0.515528	0.701055	0.206351	AT2G33810	-0.0347446	-0.00754771	0.480061	0.641571	SPL3	squamosa promoter binding protein-like 3 [Source:TAIR;Acc:AT2G33810]	ath-miR157a,ath-miR157b,ath-miR157c,ath-miR157d
ath-miR157b	1.21009	0.515528	0.701055	0.206351	AT1G58190	-0.112492	-0.220986	1.29269	1.24236	RLP9	receptor like protein 9 [Source:TAIR;Acc:AT1G58190]	ath-miR157a,ath-miR157b,ath-miR157c
ath-miR157b	1.21009	0.515528	0.701055	0.206351	AT5G21150	-0.177409	-0.25083	0.621095	0.282923	AGO9	Argonaute family protein [Source:TAIR;Acc:AT5G21150]	ath-miR157a,ath-miR157b,ath-miR157c
ath-miR157b	1.21009	0.515528	0.701055	0.206351	AT5G23610	-0.247481	-0.272401	0.334282	0.221453	AT5G23610	BEST Arabidopsis thaliana protein match is: SWITCH1 (TAIR:AT5G51330.1); Has 170 Blast hits to 162 proteins in 36 species: Archae - 3; Bacteria - 6; Metazoa - 6; Fungi - 4; Plants - 117; Viruses - 0; Other Eukaryotes - 34 (source: NCBI BLink). [Source:TAIR;Acc:AT5G23610]	ath-miR157a,ath-miR157b
ath-miR157b	1.21009	0.515528	0.701055	0.206351	AT1G69170	-0.253784	-0.242498	0.0628383	0.19648	SPL6	Squamosa promoter-binding protein-like (SBP domain) transcription factor family protein [Source:TAIR;Acc:AT1G69170]	ath-miR157a,ath-miR157b,ath-miR157c,ath-miR157d
ath-miR157b	1.21009	0.515528	0.701055	0.206351	AT1G61620	-0.0454464	0.0040875	0.470193	0.372149	AT1G61620	phosphoinositide binding [Source:TAIR;Acc:AT1G61620]	ath-miR157a,ath-miR157b
ath-miR157b	1.21009	0.515528	0.701055	0.206351	AT2G27590	0.12281	-0.0600029	0.244353	0.192766	AT2G27590	S-adenosyl-L-methionine-dependent methyltransferases superfamily protein [Source:TAIR;Acc:AT2G27590]	ath-miR157a,ath-miR157b,ath-miR157c
ath-miR157b	1.21009	0.515528	0.701055	0.206351	AT3G49050	0.410865	0.286469	0.286882	0.374799	AT3G49050	alpha/beta-Hydrolases superfamily protein [Source:TAIR;Acc:AT3G49050]	ath-miR157a,ath-miR157b,ath-miR157c
ath-miR157b	1.21009	0.515528	0.701055	0.206351	AT4G36860	0.413838	0.294118	0.171715	0.237898	DAR1	LIM domain-containing protein [Source:TAIR;Acc:AT4G36860]	ath-miR157a,ath-miR157b,ath-miR157c,ath-miR447a_3p,ath-miR447b
ath-miR157b	1.21009	0.515528	0.701055	0.206351	AT1G12460	0.280138	0.235259	0.103924	0.266391	AT1G12460	Leucine-rich repeat protein kinase family protein [Source:TAIR;Acc:AT1G12460]	ath-miR157a,ath-miR157b
ath-miR157b	1.21009	0.515528	0.701055	0.206351	AT1G62010	0.411021	0.194598	-0.111177	-0.0633658	AT1G62010	Mitochondrial transcription termination factor family protein [Source:TAIR;Acc:AT1G62010]	ath-miR157a,ath-miR157b,ath-miR157c
ath-miR157b	1.21009	0.515528	0.701055	0.206351	AT3G20320	0.377511	0.224751	-0.0978005	0.0788957	TGD2	trigalactosyldiacylglycerol2 [Source:TAIR;Acc:AT3G20320]	ath-miR157a,ath-miR157b,ath-miR157c
ath-miR157b	1.21009	0.515528	0.701055	0.206351	AT1G53160	0.601921	0.409655	0.404179	0.288495	SPL4	squamosa promoter binding protein-like 4 [Source:TAIR;Acc:AT1G53160]	ath-miR157a,ath-miR157b,ath-miR157c,ath-miR157d
ath-miR157b	1.21009	0.515528	0.701055	0.206351	AT5G50570	-1.52516	-0.891344	-0.244063	-0.351224	SPL13A	Squamosa promoter-binding protein-like (SBP domain) transcription factor family protein [Source:TAIR;Acc:AT5G50570]	ath-miR157a,ath-miR157b,ath-miR157c,ath-miR157d
ath-miR157b	1.21009	0.515528	0.701055	0.206351	AT2G25600	-1.05417	-0.760464	-0.475239	-0.564225	SPIK	Shaker pollen inward K+ channel [Source:TAIR;Acc:AT2G25600]	ath-miR157a,ath-miR157b,ath-miR157c
ath-miR157b	1.21009	0.515528	0.701055	0.206351	AT4G21120	-0.929123	-0.500277	-0.0913067	-0.543501	AAT1	amino acid transporter 1 [Source:TAIR;Acc:AT4G21120]	ath-miR157a,ath-miR157b,ath-miR157c,ath-miR157d
ath-miR157b	1.21009	0.515528	0.701055	0.206351	AT4G19191	-0.525957	-0.342104	0.307944	-0.421743	PCMP-E1	Tetratricopeptide repeat (TPR)-like superfamily protein [Source:TAIR;Acc:AT4G19191]	ath-miR157a,ath-miR157b,ath-miR157c
ath-miR157b	1.21009	0.515528	0.701055	0.206351	AT3G15270	-0.213624	-0.348143	-0.45013	0.293647	SPL5	squamosa promoter binding protein-like 5 [Source:TAIR;Acc:AT3G15270]	ath-miR157a,ath-miR157b,ath-miR157c,ath-miR157d
ath-miR157b	1.21009	0.515528	0.701055	0.206351	AT4G30470	-0.820351	-0.512084	-0.820643	-0.916672	AT4G30470	NAD(P)-binding Rossmann-fold superfamily protein [Source:TAIR;Acc:AT4G30470]	ath-miR157a,ath-miR157b,ath-miR157c
ath-miR157b	1.21009	0.515528	0.701055	0.206351	AT1G27370	-0.602952	-0.425537	-0.765226	-0.545464	SPL10	squamosa promoter binding protein-like 10 [Source:TAIR;Acc:AT1G27370]	ath-miR157a,ath-miR157b,ath-miR157c,ath-miR157d
ath-miR157b	1.21009	0.515528	0.701055	0.206351	AT3G57920	-0.721323	-0.498673	-0.664575	-0.623209	SPL15	squamosa promoter binding protein-like 15 [Source:TAIR;Acc:AT3G57920]	ath-miR157a,ath-miR157b,ath-miR157c,ath-miR157d
ath-miR157b	1.21009	0.515528	0.701055	0.206351	AT2G42200	-0.702407	-0.131236	-0.424978	-0.281284	SPL9	squamosa promoter binding protein-like 9 [Source:TAIR;Acc:AT2G42200]	ath-miR157a,ath-miR157b,ath-miR157c,ath-miR157d
ath-miR157b	1.21009	0.515528	0.701055	0.206351	AT1G27360	-0.455174	-0.173964	-0.412225	-0.380638	SPL11	squamosa promoter-like 11 [Source:TAIR;Acc:AT1G27360]	ath-miR157a,ath-miR157b,ath-miR157c,ath-miR157d
ath-miR157b	1.21009	0.515528	0.701055	0.206351	AT2G17220	-0.379939	-0.3369	-0.272409	-0.273315	AT2G17220	Protein kinase superfamily protein [Source:TAIR;Acc:AT2G17220]	ath-miR157a,ath-miR157b,ath-miR157c
ath-miR157b	1.21009	0.515528	0.701055	0.206351	AT2G43710	-0.235477	-0.0697872	-0.584335	-0.502955	SSI2	Plant stearoyl-acyl-carrier-protein desaturase family protein [Source:TAIR;Acc:AT2G43710]	ath-miR157a,ath-miR157b
ath-miR157b	1.21009	0.515528	0.701055	0.206351	AT3G05165	-0.032048	-0.081693	-0.505954	-0.445762	AT3G05165	Major facilitator superfamily protein [Source:TAIR;Acc:AT3G05165]	ath-miR157a,ath-miR157b,ath-miR157c,ath-miR157d
ath-miR157b	1.21009	0.515528	0.701055	0.206351	AT4G28660	0.132011	0.116218	-0.969853	-1.08312	PSB28	photosystem II reaction center PSB28 protein [Source:TAIR;Acc:AT4G28660]	ath-miR157a,ath-miR157b,ath-miR157c
ath-miR157b	1.21009	0.515528	0.701055	0.206351	AT5G43270	0.277027	0.205489	-0.620921	-0.235684	SPL2	squamosa promoter binding protein-like 2 [Source:TAIR;Acc:AT5G43270]	ath-miR157a,ath-miR157b,ath-miR157c,ath-miR157d
ath-miR157b	1.21009	0.515528	0.701055	0.206351	AT1G71400	1.16195	0.0595853	0.0386876	-0.235341	AtRLP12	receptor like protein 12 [Source:TAIR;Acc:AT1G71400]	ath-miR157a,ath-miR157b,ath-miR157c,ath-miR157d
ath-miR157d	0.844682	0.297556	0.592595	0.178993	AT5G18590	0.158	0.00527448	0.614346	0.702412	AT5G18590	Galactose oxidase/kelch repeat superfamily protein [Source:TAIR;Acc:AT5G18590]	ath-miR157a,ath-miR157b,ath-miR157c,ath-miR157d
ath-miR157d	0.844682	0.297556	0.592595	0.178993	AT2G33810	-0.0347446	-0.00754771	0.480061	0.641571	SPL3	squamosa promoter binding protein-like 3 [Source:TAIR;Acc:AT2G33810]	ath-miR157a,ath-miR157b,ath-miR157c,ath-miR157d
ath-miR157d	0.844682	0.297556	0.592595	0.178993	AT2G03750	1.2086	0.771485	0.107588	0.490173	SOT11	P-loop containing nucleoside triphosphate hydrolases superfamily protein [Source:TAIR;Acc:AT2G03750]	ath-miR157d
ath-miR157d	0.844682	0.297556	0.592595	0.178993	AT1G69170	-0.253784	-0.242498	0.0628383	0.19648	SPL6	Squamosa promoter-binding protein-like (SBP domain) transcription factor family protein [Source:TAIR;Acc:AT1G69170]	ath-miR157a,ath-miR157b,ath-miR157c,ath-miR157d
ath-miR157d	0.844682	0.297556	0.592595	0.178993	AT3G14120	0.208128	0.142305	0.364516	0.280446	AT3G14120	FUNCTIONS IN: molecular_function unknown; INVOLVED IN: transport; LOCATED IN: nuclear pore; EXPRESSED IN: 23 plant structures; EXPRESSED DURING: 13 growth stages; CONTAINS InterPro DOMAIN/s: Nuclear pore protein 84/107 (InterPro:IPR007252); Has 5399 /.../ hits to 5001 proteins in 612 species: Archae - 19; Bacteria - 730; Metazoa - 2186; Fungi - 823; Plants - 382; Viruses - 37; Other Eukaryotes - …	ath-miR157d
ath-miR157d	0.844682	0.297556	0.592595	0.178993	AT1G53160	0.601921	0.409655	0.404179	0.288495	SPL4	squamosa promoter binding protein-like 4 [Source:TAIR;Acc:AT1G53160]	ath-miR157a,ath-miR157b,ath-miR157c,ath-miR157d
ath-miR157d	0.844682	0.297556	0.592595	0.178993	AT5G50570	-1.52516	-0.891344	-0.244063	-0.351224	SPL13A	Squamosa promoter-binding protein-like (SBP domain) transcription factor family protein [Source:TAIR;Acc:AT5G50570]	ath-miR157a,ath-miR157b,ath-miR157c,ath-miR157d
ath-miR157d	0.844682	0.297556	0.592595	0.178993	AT4G21120	-0.929123	-0.500277	-0.0913067	-0.543501	AAT1	amino acid transporter 1 [Source:TAIR;Acc:AT4G21120]	ath-miR157a,ath-miR157b,ath-miR157c,ath-miR157d
ath-miR157d	0.844682	0.297556	0.592595	0.178993	AT3G15270	-0.213624	-0.348143	-0.45013	0.293647	SPL5	squamosa promoter binding protein-like 5 [Source:TAIR;Acc:AT3G15270]	ath-miR157a,ath-miR157b,ath-miR157c,ath-miR157d
ath-miR157d	0.844682	0.297556	0.592595	0.178993	AT1G27370	-0.602952	-0.425537	-0.765226	-0.545464	SPL10	squamosa promoter binding protein-like 10 [Source:TAIR;Acc:AT1G27370]	ath-miR157a,ath-miR157b,ath-miR157c,ath-miR157d
ath-miR157d	0.844682	0.297556	0.592595	0.178993	AT3G57920	-0.721323	-0.498673	-0.664575	-0.623209	SPL15	squamosa promoter binding protein-like 15 [Source:TAIR;Acc:AT3G57920]	ath-miR157a,ath-miR157b,ath-miR157c,ath-miR157d
ath-miR157d	0.844682	0.297556	0.592595	0.178993	AT2G42200	-0.702407	-0.131236	-0.424978	-0.281284	SPL9	squamosa promoter binding protein-like 9 [Source:TAIR;Acc:AT2G42200]	ath-miR157a,ath-miR157b,ath-miR157c,ath-miR157d
ath-miR157d	0.844682	0.297556	0.592595	0.178993	AT1G27360	-0.455174	-0.173964	-0.412225	-0.380638	SPL11	squamosa promoter-like 11 [Source:TAIR;Acc:AT1G27360]	ath-miR157a,ath-miR157b,ath-miR157c,ath-miR157d
ath-miR157d	0.844682	0.297556	0.592595	0.178993	AT3G05165	-0.032048	-0.081693	-0.505954	-0.445762	AT3G05165	Major facilitator superfamily protein [Source:TAIR;Acc:AT3G05165]	ath-miR157a,ath-miR157b,ath-miR157c,ath-miR157d
ath-miR157d	0.844682	0.297556	0.592595	0.178993	AT5G43270	0.277027	0.205489	-0.620921	-0.235684	SPL2	squamosa promoter binding protein-like 2 [Source:TAIR;Acc:AT5G43270]	ath-miR157a,ath-miR157b,ath-miR157c,ath-miR157d
ath-miR157d	0.844682	0.297556	0.592595	0.178993	AT1G71400	1.16195	0.0595853	0.0386876	-0.235341	AtRLP12	receptor like protein 12 [Source:TAIR;Acc:AT1G71400]	ath-miR157a,ath-miR157b,ath-miR157c,ath-miR157d
ath-miR158a	0.675837	0.320579	0.240265	0.176975	AT4G15760	-0.393354	-0.296598	1.57577	1.81008	MO1	monooxygenase 1 [Source:TAIR;Acc:AT4G15760]	ath-miR158a
ath-miR158a	0.675837	0.320579	0.240265	0.176975	AT1G79680	1.44763	0.361754	0.136079	0.787881	WAKL10	WALL ASSOCIATED KINASE (WAK)-LIKE 10 [Source:TAIR;Acc:AT1G79680]	ath-miR158a
ath-miR158a	0.675837	0.320579	0.240265	0.176975	AT2G03220	0.297867	0.384712	0.195374	0.302889	FT1	fucosyltransferase 1 [Source:TAIR;Acc:AT2G03220]	ath-miR158a
ath-miR158a	0.675837	0.320579	0.240265	0.176975	AT4G08690	0.269269	0.103524	0.132406	0.267043	AT4G08690	Sec14p-like phosphatidylinositol transfer family protein [Source:TAIR;Acc:AT4G08690]	ath-miR158a
ath-miR158a	0.675837	0.320579	0.240265	0.176975	AT1G62860	0.33328	0.178334	-0.000895237	0.0963036	AT1G62860	pseudogene of pentatricopeptide (PPR) repeat-containing protein [Source:TAIR;Acc:AT1G62860]	ath-miR158a
ath-miR158a	0.675837	0.320579	0.240265	0.176975	AT2G24530	0.405533	0.25435	0.496288	0.390907	AT2G24530	unknown protein; BEST Arabidopsis thaliana protein match is: unknown protein (TAIR:AT4G31440.1); Has 30201 Blast hits to 17322 proteins in 780 species: Archae - 12; Bacteria - 1396; Metazoa - 17338; Fungi - 3422; Plants - 5037; Viruses - 0; Other Eu /.../es - 2996 (source: NCBI BLink). [Source:TAIR;Acc:AT2G24530]	ath-miR158a
ath-miR158a	0.675837	0.320579	0.240265	0.176975	AT1G72180	0.573373	0.392516	-0.060995	0.271868	AT1G72180	Leucine-rich receptor-like protein kinase family protein [Source:TAIR;Acc:AT1G72180]	ath-miR158a
ath-miR158a	0.675837	0.320579	0.240265	0.176975	AT2G03210	-1.38615	-0.747109	-0.150898	-0.977376	FUT2	fucosyltransferase 2 [Source:TAIR;Acc:AT2G03210]	ath-miR158a
ath-miR158a	0.675837	0.320579	0.240265	0.176975	AT4G22590	-1.08831	-0.855281	-0.784799	-0.875707	TPPG	Haloacid dehalogenase-like hydrolase (HAD) superfamily protein [Source:TAIR;Acc:AT4G22590]	ath-miR158a
ath-miR158a	0.675837	0.320579	0.240265	0.176975	AT3G19270	-1.06079	-0.306686	-0.567755	-0.720328	CYP707A4	cytochrome P450, family 707, subfamily A, polypeptide 4 [Source:TAIR;Acc:AT3G19270]	ath-miR158a
ath-miR158a	0.675837	0.320579	0.240265	0.176975	AT1G73680	-0.403037	-0.0489686	-0.0506276	0.0274437	ALPHA DOX2	alpha dioxygenase [Source:TAIR;Acc:AT1G73680]	ath-miR158a
ath-miR158a	0.675837	0.320579	0.240265	0.176975	AT5G63790	-0.500748	-0.234681	-0.176775	-0.173561	ANAC102	NAC domain containing protein 102 [Source:TAIR;Acc:AT5G63790]	ath-miR158a
ath-miR158a	0.675837	0.320579	0.240265	0.176975	AT2G41110	-0.559189	-0.444206	-0.531452	-0.593129	CAM2	calmodulin 2 [Source:TAIR;Acc:AT2G41110]	ath-miR158a
ath-miR158a	0.675837	0.320579	0.240265	0.176975	AT1G69730	-0.278799	-0.348564	-0.644645	-0.591758	WAKL9	Wall-associated kinase family protein [Source:TAIR;Acc:AT1G69730]	ath-miR158a
ath-miR158a	0.675837	0.320579	0.240265	0.176975	AT2G46590	-0.407703	-0.214279	-0.35801	-0.195541	DAG2	Dof-type zinc finger DNA-binding family protein [Source:TAIR;Acc:AT2G46590]	ath-miR158a
ath-miR158a	0.675837	0.320579	0.240265	0.176975	AT5G24780	0.805755	0.590487	-0.843259	-0.871514	VSP1	vegetative storage protein 1 [Source:TAIR;Acc:AT5G24780]	ath-miR158a
ath-miR158a	0.675837	0.320579	0.240265	0.176975	AT1G30240	0.278561	0.0596137	-0.144323	-0.177515	AT1G30240	FUNCTIONS IN: binding; INVOLVED IN: biological_process unknown; LOCATED IN: cellular_component unknown; EXPRESSED IN: 21 plant structures; EXPRESSED DURING: 13 growth stages; CONTAINS InterPro DOMAIN/s: Armadillo-type fold (InterPro:IPR016024); Has /.../ast hits to 164 proteins in 73 species: Archae - 0; Bacteria - 0; Metazoa - 47; Fungi - 68; Plants - 46; Viruses - 0; Other Eukaryotes - 4 (sourc…	ath-miR158a
ath-miR158a	0.675837	0.320579	0.240265	0.176975	AT5G27395	0.202278	0.148106	-0.325186	-0.120909	AT5G27395	Mitochondrial inner membrane translocase complex, subunit Tim44-related protein [Source:TAIR;Acc:AT5G27395]	ath-miR158a
ath-miR158a	0.675837	0.320579	0.240265	0.176975	AT3G19590	0.494229	0.339181	-0.225761	-0.150707	BUB3.1	Transducin/WD40 repeat-like superfamily protein [Source:TAIR;Acc:AT3G19590]	ath-miR158a
ath-miR158a	0.675837	0.320579	0.240265	0.176975	AT4G14800	0.374239	0.29395	-0.391789	-0.33867	PBD2	20S proteasome beta subunit D2 [Source:TAIR;Acc:AT4G14800]	ath-miR158a
ath-miR158a	0.675837	0.320579	0.240265	0.176975	AT1G49910	0.40352	0.310488	-0.119246	-0.313379	BUB3.2	Transducin/WD40 repeat-like superfamily protein [Source:TAIR;Acc:AT1G49910]	ath-miR158a
ath-miR5026	0.217913	-0.048358	1.52687	1.0601	AT5G14180	0.394739	0.262312	1.20728	0.882526	MPL1	Myzus persicae-induced lipase 1 [Source:TAIR;Acc:AT5G14180]	ath-miR5026
ath-miR169c	0.428383	0.0547769	1.90031	0.631628	AT5G12840	-0.130711	-0.15868	0.255582	0.152872	HAP2A	nuclear factor Y, subunit A1 [Source:TAIR;Acc:AT5G12840]	ath-miR169a,ath-miR169b,ath-miR169c,ath-miR169h,ath-miR169i,ath-miR169j,ath-miR169k,ath-miR169l,ath-miR169m,ath-miR169n
ath-miR169c	0.428383	0.0547769	1.90031	0.631628	AT5G06510	0.559918	0.272743	-2.11688	-1.72743	NF-YA10	nuclear factor Y, subunit A10 [Source:TAIR;Acc:AT5G06510]	ath-miR169a,ath-miR169b,ath-miR169c,ath-miR169h,ath-miR169i,ath-miR169j,ath-miR169k,ath-miR169l,ath-miR169m,ath-miR169n
ath-miR169c	0.428383	0.0547769	1.90031	0.631628	AT4G32920	-0.651363	-0.462731	-0.590187	-0.756166	AT4G32920	glycine-rich protein [Source:TAIR;Acc:AT4G32920]	ath-miR169a,ath-miR169b,ath-miR169c
ath-miR169c	0.428383	0.0547769	1.90031	0.631628	AT1G54160	0.684133	0.58845	-0.208542	-0.323814	NFYA5	nuclear factor Y, subunit A5 [Source:TAIR;Acc:AT1G54160]	ath-miR169a,ath-miR169b,ath-miR169c,ath-miR169h,ath-miR169i,ath-miR169j,ath-miR169k,ath-miR169l,ath-miR169m,ath-miR169n
ath-miR169c	0.428383	0.0547769	1.90031	0.631628	AT1G72830	0.785254	0.567871	-0.30893	-0.0815651	HAP2C	nuclear factor Y, subunit A3 [Source:TAIR;Acc:AT1G72830]	ath-miR169a,ath-miR169b,ath-miR169c,ath-miR169h,ath-miR169i,ath-miR169j,ath-miR169k,ath-miR169l,ath-miR169m,ath-miR169n
ath-miR169a	0.428383	0.0547769	1.90031	0.631628	AT5G12840	-0.130711	-0.15868	0.255582	0.152872	HAP2A	nuclear factor Y, subunit A1 [Source:TAIR;Acc:AT5G12840]	ath-miR169a,ath-miR169b,ath-miR169c,ath-miR169h,ath-miR169i,ath-miR169j,ath-miR169k,ath-miR169l,ath-miR169m,ath-miR169n
ath-miR169a	0.428383	0.0547769	1.90031	0.631628	AT5G06510	0.559918	0.272743	-2.11688	-1.72743	NF-YA10	nuclear factor Y, subunit A10 [Source:TAIR;Acc:AT5G06510]	ath-miR169a,ath-miR169b,ath-miR169c,ath-miR169h,ath-miR169i,ath-miR169j,ath-miR169k,ath-miR169l,ath-miR169m,ath-miR169n
ath-miR169a	0.428383	0.0547769	1.90031	0.631628	AT5G61820	-1.18242	-0.25704	-0.679634	-0.808816	AT5G61820	FUNCTIONS IN: molecular_function unknown; INVOLVED IN: biological_process unknown; LOCATED IN: vacuole; EXPRESSED IN: 24 plant structures; EXPRESSED DURING: 15 growth stages; CONTAINS InterPro DOMAIN/s: Stress up-regulated Nod 19 (InterPro:IPR011692 /.../ 30201 Blast hits to 17322 proteins in 780 species: Archae - 12; Bacteria - 1396; Metazoa - 17338; Fungi - 3422; Plants - 5037; Viruses - 0; Oth…	ath-miR169a
ath-miR169a	0.428383	0.0547769	1.90031	0.631628	AT4G39640	-0.578607	-0.0662871	-0.739868	-0.266231	GGT1	gamma-glutamyl transpeptidase 1 [Source:TAIR;Acc:AT4G39640]	ath-miR169a
ath-miR169a	0.428383	0.0547769	1.90031	0.631628	AT4G32920	-0.651363	-0.462731	-0.590187	-0.756166	AT4G32920	glycine-rich protein [Source:TAIR;Acc:AT4G32920]	ath-miR169a,ath-miR169b,ath-miR169c
ath-miR169a	0.428383	0.0547769	1.90031	0.631628	AT1G54160	0.684133	0.58845	-0.208542	-0.323814	NFYA5	nuclear factor Y, subunit A5 [Source:TAIR;Acc:AT1G54160]	ath-miR169a,ath-miR169b,ath-miR169c,ath-miR169h,ath-miR169i,ath-miR169j,ath-miR169k,ath-miR169l,ath-miR169m,ath-miR169n
ath-miR169a	0.428383	0.0547769	1.90031	0.631628	AT1G72830	0.785254	0.567871	-0.30893	-0.0815651	HAP2C	nuclear factor Y, subunit A3 [Source:TAIR;Acc:AT1G72830]	ath-miR169a,ath-miR169b,ath-miR169c,ath-miR169h,ath-miR169i,ath-miR169j,ath-miR169k,ath-miR169l,ath-miR169m,ath-miR169n
ath-miR169a	0.428383	0.0547769	1.90031	0.631628	AT1G52040	1.00378	0.729479	-0.402103	-0.0807801	MBP1	myrosinase-binding protein 1 [Source:TAIR;Acc:AT1G52040]	ath-miR169a,ath-miR846
ath-miR169a	0.428383	0.0547769	1.90031	0.631628	AT5G09590	0.416409	0.231605	-0.421845	-0.530608	MTHSC70-2	mitochondrial HSO70 2 [Source:TAIR;Acc:AT5G09590]	ath-miR169a
ath-miR169b	0.428383	0.0547769	1.90031	0.631628	AT5G12840	-0.130711	-0.15868	0.255582	0.152872	HAP2A	nuclear factor Y, subunit A1 [Source:TAIR;Acc:AT5G12840]	ath-miR169a,ath-miR169b,ath-miR169c,ath-miR169h,ath-miR169i,ath-miR169j,ath-miR169k,ath-miR169l,ath-miR169m,ath-miR169n
ath-miR169b	0.428383	0.0547769	1.90031	0.631628	AT5G06510	0.559918	0.272743	-2.11688	-1.72743	NF-YA10	nuclear factor Y, subunit A10 [Source:TAIR;Acc:AT5G06510]	ath-miR169a,ath-miR169b,ath-miR169c,ath-miR169h,ath-miR169i,ath-miR169j,ath-miR169k,ath-miR169l,ath-miR169m,ath-miR169n
ath-miR169b	0.428383	0.0547769	1.90031	0.631628	AT4G32920	-0.651363	-0.462731	-0.590187	-0.756166	AT4G32920	glycine-rich protein [Source:TAIR;Acc:AT4G32920]	ath-miR169a,ath-miR169b,ath-miR169c
ath-miR169b	0.428383	0.0547769	1.90031	0.631628	AT1G54160	0.684133	0.58845	-0.208542	-0.323814	NFYA5	nuclear factor Y, subunit A5 [Source:TAIR;Acc:AT1G54160]	ath-miR169a,ath-miR169b,ath-miR169c,ath-miR169h,ath-miR169i,ath-miR169j,ath-miR169k,ath-miR169l,ath-miR169m,ath-miR169n
ath-miR169b	0.428383	0.0547769	1.90031	0.631628	AT1G72830	0.785254	0.567871	-0.30893	-0.0815651	HAP2C	nuclear factor Y, subunit A3 [Source:TAIR;Acc:AT1G72830]	ath-miR169a,ath-miR169b,ath-miR169c,ath-miR169h,ath-miR169i,ath-miR169j,ath-miR169k,ath-miR169l,ath-miR169m,ath-miR169n
ath-miR391	0.129487	-0.483293	0.810478	1.00488	AT4G03560	0.166973	0.177696	0.882587	1.02535	ATTPC1	two-pore channel 1 [Source:TAIR;Acc:AT4G03560]	ath-miR391
ath-miR391	0.129487	-0.483293	0.810478	1.00488	AT4G18550	0.129215	0.157587	1.034	0.924488	DSEL	alpha/beta-Hydrolases superfamily protein [Source:TAIR;Acc:AT4G18550]	ath-miR391
ath-miR391	0.129487	-0.483293	0.810478	1.00488	AT1G66730	-0.0682015	-0.0967265	0.446291	0.352575	AtLIG6	DNA LIGASE 6 [Source:TAIR;Acc:AT1G66730]	ath-miR172d,ath-miR391
ath-miR391	0.129487	-0.483293	0.810478	1.00488	AT1G78570	-0.655646	-0.454206	-2.46979	-2.3286	RHM1	rhamnose biosynthesis 1 [Source:TAIR;Acc:AT1G78570]	ath-miR391
ath-miR391	0.129487	-0.483293	0.810478	1.00488	AT1G50990	-1.16798	-0.900765	-0.393837	-0.900483	AT1G50990	Protein kinase protein with tetratricopeptide repeat domain [Source:TAIR;Acc:AT1G50990]	ath-miR391
ath-miR391	0.129487	-0.483293	0.810478	1.00488	AT3G21480	0.165511	-0.0474253	-0.296096	-0.233176	AT3G21480	BRCT domain-containing DNA repair protein [Source:TAIR;Acc:AT3G21480]	ath-miR168b,ath-miR391
ath-miR391	0.129487	-0.483293	0.810478	1.00488	AT1G44170	0.22292	0.313412	-0.399338	-0.230123	ALDH3H1	aldehyde dehydrogenase 3H1 [Source:TAIR;Acc:AT1G44170]	ath-miR391
ath-miR850	-0.0198689	-0.316448	0.970245	1.35232	AT3G46630	0.326064	0.145415	0.0578573	0.348438	AT3G46630	Protein of unknown function (DUF3223) [Source:TAIR;Acc:AT3G46630]	ath-miR850
ath-miR850	-0.0198689	-0.316448	0.970245	1.35232	AT4G23470	0.308906	0.197114	0.160499	0.226319	AT4G23470	PLAC8 family protein [Source:TAIR;Acc:AT4G23470]	ath-miR850
ath-miR850	-0.0198689	-0.316448	0.970245	1.35232	AT3G28007	-1.41948	-0.243153	-1.04938	-0.864529	SWEET4	Nodulin MtN3 family protein [Source:TAIR;Acc:AT3G28007]	ath-miR173_5p,ath-miR850
ath-miR850	-0.0198689	-0.316448	0.970245	1.35232	AT3G50390	-0.883986	-0.744716	-0.35019	-0.574888	AT3G50390	Transducin/WD40 repeat-like superfamily protein [Source:TAIR;Acc:AT3G50390]	ath-miR447a_3p,ath-miR447b,ath-miR850
ath-miR850	-0.0198689	-0.316448	0.970245	1.35232	AT2G44500	-0.545823	-0.26837	0.291345	0.601717	AT2G44500	O-fucosyltransferase family protein [Source:TAIR;Acc:AT2G44500]	ath-miR850
ath-miR850	-0.0198689	-0.316448	0.970245	1.35232	AT3G59750	0.312909	0.0121885	-0.214811	-0.797277	LECRK58	Concanavalin A-like lectin protein kinase family protein [Source:TAIR;Acc:AT3G59750]	ath-miR850
ath-miR850	-0.0198689	-0.316448	0.970245	1.35232	AT2G43240	-0.177233	0.0575502	-0.635257	-0.594322	AT2G43240	Nucleotide-sugar transporter family protein [Source:TAIR;Acc:AT2G43240]	ath-miR850
ath-miR850	-0.0198689	-0.316448	0.970245	1.35232	AT1G09340	0.0231646	-0.00026639	-0.740674	-0.774216	CRB	chloroplast RNA binding [Source:TAIR;Acc:AT1G09340]	ath-miR850
ath-miR869.2	-0.919523	0.222674	0.744634	0.809523	AT2G36720	0.225613	0.0971792	0.417444	0.417514	AT2G36720	Acyl-CoA N-acyltransferase with RING/FYVE/PHD-type zinc finger domain [Source:TAIR;Acc:AT2G36720]	ath-miR869.2
ath-miR869.2	-0.919523	0.222674	0.744634	0.809523	AT1G67120	0.447133	0.130147	0.28954	0.242503	AT1G67120	ATPases;nucleotide binding;ATP binding;nucleoside-triphosphatases;transcription factor binding [Source:TAIR;Acc:AT1G67120]	ath-miR396a,ath-miR869.2
ath-miR869.2	-0.919523	0.222674	0.744634	0.809523	AT3G14310	0.376964	0.210186	0.15581	0.363359	ATPME3	pectin methylesterase 3 [Source:TAIR;Acc:AT3G14310]	ath-miR869.2
ath-miR869.2	-0.919523	0.222674	0.744634	0.809523	AT5G58470	0.179589	0.123514	0.111052	0.0551538	TAF15b	TBP-associated factor 15B [Source:TAIR;Acc:AT5G58470]	ath-miR869.2
ath-miR869.2	-0.919523	0.222674	0.744634	0.809523	AT2G30750	0.831197	0.141775	0.515749	0.32258	CYP71A12	cytochrome P450, family 71, subfamily A, polypeptide 12 [Source:TAIR;Acc:AT2G30750]	ath-miR869.2
ath-miR869.2	-0.919523	0.222674	0.744634	0.809523	AT3G56880	-1.7353	-0.955158	0.194355	0.0982182	AT3G56880	VQ motif-containing protein [Source:TAIR;Acc:AT3G56880]	ath-miR869.2
ath-miR869.2	-0.919523	0.222674	0.744634	0.809523	AT5G66558	-0.860516	-0.534742	-0.33786	-0.410576	AT5G66558	other RNA [Source:TAIR;Acc:AT5G66558]	ath-miR869.2
ath-miR869.2	-0.919523	0.222674	0.744634	0.809523	AT5G42490	-0.904769	-0.713983	-0.310203	-0.315052	AT5G42490	ATP binding microtubule motor family protein [Source:TAIR;Acc:AT5G42490]	ath-miR869.2
ath-miR408	-1.10206	-0.697451	0.856898	1.36236	AT1G21520	0.0648043	-0.0712316	0.508968	0.726891	AT1G21520	unknown protein; Has 9 Blast hits to 9 proteins in 2 species: Archae - 0; Bacteria - 0; Metazoa - 0; Fungi - 0; Plants - 9; Viruses - 0; Other Eukaryotes - 0 (source: NCBI BLink). [Source:TAIR;Acc:AT1G21520]	ath-miR408
ath-miR408	-1.10206	-0.697451	0.856898	1.36236	AT2G21830	1.38117	1.02155	-0.475136	-0.574744	AT2G21830	Cysteine/Histidine-rich C1 domain family protein [Source:TAIR;Acc:AT2G21830]	ath-miR408
ath-miR408	-1.10206	-0.697451	0.856898	1.36236	AT5G01950	0.105566	-0.0701484	0.218209	0.280551	AT5G01950	Leucine-rich repeat protein kinase family protein [Source:TAIR;Acc:AT5G01950]	ath-miR408,ath-miR846
ath-miR408	-1.10206	-0.697451	0.856898	1.36236	AT5G60690	0.429436	0.295285	0.0442769	0.0293732	REV	Homeobox-leucine zipper family protein / lipid-binding START domain-containing protein [Source:TAIR;Acc:AT5G60690]	ath-miR408
ath-miR408	-1.10206	-0.697451	0.856898	1.36236	AT3G12870	0.824646	0.58472	0.0578283	0.0451393	AT3G12870	unknown protein; BEST Arabidopsis thaliana protein match is: unknown protein (TAIR:AT5G56120.1); Has 70 Blast hits to 70 proteins in 12 species: Archae - 0; Bacteria - 0; Metazoa - 0; Fungi - 0; Plants - 70; Viruses - 0; Other Eukaryotes - 0 (source /.../ BLink). [Source:TAIR;Acc:AT3G12870]	ath-miR408
ath-miR408	-1.10206	-0.697451	0.856898	1.36236	AT5G10660	-1.06249	-0.847105	-0.449693	-0.783721	AT5G10660	calmodulin-binding protein-related [Source:TAIR;Acc:AT5G10660]	ath-miR408
ath-miR408	-1.10206	-0.697451	0.856898	1.36236	AT1G67480	-0.571579	-0.55647	0.0152022	0.00438363	AT1G67480	Galactose oxidase/kelch repeat superfamily protein [Source:TAIR;Acc:AT1G67480]	ath-miR408
ath-miR408	-1.10206	-0.697451	0.856898	1.36236	AT4G37030	-0.826586	-0.492748	0.152212	0.0243291	AT4G37030	unknown protein; FUNCTIONS IN: molecular_function unknown; INVOLVED IN: biological_process unknown; LOCATED IN: endomembrane system; BEST Arabidopsis thaliana protein match is: unknown protein (TAIR:AT4G12680.1); Has 101 Blast hits to 99 proteins in /.../ecies: Archae - 0; Bacteria - 0; Metazoa - 0; Fungi - 0; Plants - 101; Viruses - 0; Other Eukaryotes - 0 (source: NCBI BLink). [Source:TAIR;Acc:…	ath-miR172a,ath-miR172b_3p,ath-miR172c,ath-miR172d,ath-miR408
ath-miR408	-1.10206	-0.697451	0.856898	1.36236	AT4G02940	-0.694642	-0.0425011	-0.784385	-0.814849	AT4G02940	oxidoreductase, 2OG-Fe(II) oxygenase family protein [Source:TAIR;Acc:AT4G02940]	ath-miR408
ath-miR408	-1.10206	-0.697451	0.856898	1.36236	AT5G05390	1.12319	0.598608	-0.442787	-1.21181	LAC12	laccase 12 [Source:TAIR;Acc:AT5G05390]	ath-miR408
ath-miR408	-1.10206	-0.697451	0.856898	1.36236	AT1G32080	-0.102987	0.0225918	-0.824693	-0.849517	F3C3.12	membrane protein, putative [Source:TAIR;Acc:AT1G32080]	ath-miR408
ath-miR408	-1.10206	-0.697451	0.856898	1.36236	AT1G17180	-0.217938	0.413761	-1.52262	-1.03003	ATGSTU25	glutathione S-transferase TAU 25 [Source:TAIR;Acc:AT1G17180]	ath-miR408
ath-miR408	-1.10206	-0.697451	0.856898	1.36236	AT2G02850	0.07617	0.176269	-0.681089	-0.495048	ARPN	plantacyanin [Source:TAIR;Acc:AT2G02850]	ath-miR408
ath-miR408	-1.10206	-0.697451	0.856898	1.36236	AT5G42150	0.0716521	0.0377033	-0.458403	-0.518149	AT5G42150	Glutathione S-transferase family protein [Source:TAIR;Acc:AT5G42150]	ath-miR408
ath-miR399b	-0.585774	-0.406454	1.23317	1.29924	AT1G21270	1.5395	0.692971	-0.412784	0.699058	WAK2	wall-associated kinase 2 [Source:TAIR;Acc:AT1G21270]	ath-miR399b,ath-miR399c
ath-miR399b	-0.585774	-0.406454	1.23317	1.29924	AT3G54700	-1.82228	-0.540479	-0.325489	-1.27767	PHT1;7	phosphate transporter 1;7 [Source:TAIR;Acc:AT3G54700]	ath-miR399b
ath-miR399b	-0.585774	-0.406454	1.23317	1.29924	AT2G33770	-0.143561	-0.0970601	-0.352496	-0.482728	UBC24	phosphate 2 [Source:TAIR;Acc:AT2G33770]	ath-miR399b,ath-miR399c
ath-miR399b	-0.585774	-0.406454	1.23317	1.29924	AT4G00170	0.147119	0.0939565	-0.181443	-0.156681	PVA13	Plant VAMP (vesicle-associated membrane protein) family protein [Source:TAIR;Acc:AT4G00170]	ath-miR399b,ath-miR399c
ath-miR399c	-0.585774	-0.406454	1.23317	1.29924	AT1G21270	1.5395	0.692971	-0.412784	0.699058	WAK2	wall-associated kinase 2 [Source:TAIR;Acc:AT1G21270]	ath-miR399b,ath-miR399c
ath-miR399c	-0.585774	-0.406454	1.23317	1.29924	AT5G01760	-1.70495	-0.554082	-0.594921	-1.43013	AT5G01760	ENTH/VHS/GAT family protein [Source:TAIR;Acc:AT5G01760]	ath-miR399c
ath-miR399c	-0.585774	-0.406454	1.23317	1.29924	AT2G34410	-0.200893	-0.0599326	-0.484672	-0.366288	AT2G34410	O-acetyltransferase family protein [Source:TAIR;Acc:AT2G34410]	ath-miR399c
ath-miR399c	-0.585774	-0.406454	1.23317	1.29924	AT3G20870	0.015561	0.0278507	-0.454135	-0.171338	ZTP29	ZIP metal ion transporter family [Source:TAIR;Acc:AT3G20870]	ath-miR399c
ath-miR399c	-0.585774	-0.406454	1.23317	1.29924	AT2G33770	-0.143561	-0.0970601	-0.352496	-0.482728	UBC24	phosphate 2 [Source:TAIR;Acc:AT2G33770]	ath-miR399b,ath-miR399c
ath-miR399c	-0.585774	-0.406454	1.23317	1.29924	AT4G00170	0.147119	0.0939565	-0.181443	-0.156681	PVA13	Plant VAMP (vesicle-associated membrane protein) family protein [Source:TAIR;Acc:AT4G00170]	ath-miR399b,ath-miR399c
ath-miR397b	-0.0514069	-0.521019	-0.284347	1.5518	AT1G33990	-0.0715202	0.01262	0.382943	0.607893	ATMES14	methyl esterase 14 [Source:TAIR;Acc:AT1G33990]	ath-miR397b
ath-miR397b	-0.0514069	-0.521019	-0.284347	1.5518	AT3G60250	-0.156364	-0.164842	0.500121	0.639148	CKB3	casein kinase II beta chain 3 [Source:TAIR;Acc:AT3G60250]	ath-miR397b
ath-miR397b	-0.0514069	-0.521019	-0.284347	1.5518	AT5G46410	-0.153314	-0.159313	0.999131	1.03564	SSP4	SCP1-like small phosphatase 4 [Source:TAIR;Acc:AT5G46410]	ath-miR397b
ath-miR397b	-0.0514069	-0.521019	-0.284347	1.5518	AT5G17900	-0.179086	-0.212449	0.49143	0.4191	AT5G17900	microfibrillar-associated protein-related [Source:TAIR;Acc:AT5G17900]	ath-miR397b
ath-miR397b	-0.0514069	-0.521019	-0.284347	1.5518	AT5G05540	0.142771	0.0155949	0.481924	0.376034	SDN2	small RNA degrading nuclease 2 [Source:TAIR;Acc:AT5G05540]	ath-miR397b
ath-miR397b	-0.0514069	-0.521019	-0.284347	1.5518	AT5G47020	0.0957171	-0.0467008	0.368168	0.400646	AT5G47020	unknown protein; FUNCTIONS IN: molecular_function unknown; INVOLVED IN: biological_process unknown; LOCATED IN: endomembrane system; EXPRESSED IN: 23 plant structures; EXPRESSED DURING: 13 growth stages; BEST Arabidopsis thaliana protein match is: u /.../ protein (TAIR:AT5G11700.2); Has 1807 Blast hits to 1807 proteins in 277 species: Archae - 0; Bacteria - 0; Metazoa - 736; Fungi - 347; Plants -…	ath-miR397b
ath-miR397b	-0.0514069	-0.521019	-0.284347	1.5518	AT4G33620	0.0170689	-0.0448098	0.440952	0.352057	ULP2A	Cysteine proteinases superfamily protein [Source:TAIR;Acc:AT4G33620]	ath-miR397b
ath-miR397b	-0.0514069	-0.521019	-0.284347	1.5518	AT5G26240	-0.085452	-0.0770016	0.210087	0.283881	CLC-D	chloride channel D [Source:TAIR;Acc:AT5G26240]	ath-miR397b
ath-miR397b	-0.0514069	-0.521019	-0.284347	1.5518	AT4G31540	0.334046	0.199902	0.317354	0.290488	ATEXO70G1	exocyst subunit exo70 family protein G1 [Source:TAIR;Acc:AT4G31540]	ath-miR397b
ath-miR397b	-0.0514069	-0.521019	-0.284347	1.5518	AT5G58240	0.150717	0.184578	0.275787	0.297383	FHIT	FRAGILE HISTIDINE TRIAD [Source:TAIR;Acc:AT5G58240]	ath-miR397b
ath-miR397b	-0.0514069	-0.521019	-0.284347	1.5518	AT5G38565	-0.263305	-0.210131	0.0482392	-0.615472	AT5G38565	F-box/FBD-like domains containing protein [Source:TAIR;Acc:AT5G38565]	ath-miR397b
ath-miR397b	-0.0514069	-0.521019	-0.284347	1.5518	AT5G60020	-0.337524	0.132389	-1.15284	-0.553562	LAC17	laccase 17 [Source:TAIR;Acc:AT5G60020]	ath-miR397b
ath-miR397b	-0.0514069	-0.521019	-0.284347	1.5518	AT2G38080	-0.518008	-0.131415	-1.10187	-0.488914	IRX12	Laccase/Diphenol oxidase family protein [Source:TAIR;Acc:AT2G38080]	ath-miR397b
ath-miR397b	-0.0514069	-0.521019	-0.284347	1.5518	AT5G64020	-0.404561	-0.268768	-0.725628	-0.717993	TBL14	TRICHOME BIREFRINGENCE-LIKE 14 [Source:TAIR;Acc:AT5G64020]	ath-miR397b
ath-miR397b	-0.0514069	-0.521019	-0.284347	1.5518	AT4G17330	0.101582	0.0149162	-0.122409	-0.17431	ATG2484-1	G2484-1 protein [Source:TAIR;Acc:AT4G17330]	ath-miR397b
ath-miR397b	-0.0514069	-0.521019	-0.284347	1.5518	AT3G57870	0.119993	0.102722	-0.240049	-0.268611	AHUS5	sumo conjugation enzyme 1 [Source:TAIR;Acc:AT3G57870]	ath-miR397b
ath-miR397b	-0.0514069	-0.521019	-0.284347	1.5518	AT1G21090	0.421745	0.266755	-0.217896	-0.207307	AT1G21090	Cupredoxin superfamily protein [Source:TAIR;Acc:AT1G21090]	ath-miR397b,ath-miR447a_3p,ath-miR447b
ath-miR163	-0.86849	-0.212975	-0.167771	-0.120352	AT1G15125	1.86369	-0.0990047	1.98132	2.83548	AT1G15125	S-adenosyl-L-methionine-dependent methyltransferases superfamily protein [Source:TAIR;Acc:AT1G15125]	ath-miR163
ath-miR163	-0.86849	-0.212975	-0.167771	-0.120352	AT3G44860	3.12272	1.70799	0.024616	0.22607	FAMT	farnesoic acid carboxyl-O-methyltransferase [Source:TAIR;Acc:AT3G44860]	ath-miR163
ath-miR163	-0.86849	-0.212975	-0.167771	-0.120352	AT1G66700	1.18186	-0.129467	0.729796	0.657513	PXMT1	S-adenosyl-L-methionine-dependent methyltransferases superfamily protein [Source:TAIR;Acc:AT1G66700]	ath-miR163
ath-miR163	-0.86849	-0.212975	-0.167771	-0.120352	AT4G32820	0.501624	0.304851	0.123933	0.0458716	AT4G32820	Tetratricopeptide repeat (TPR)-like superfamily protein [Source:TAIR;Acc:AT4G32820]	ath-miR163
ath-miR163	-0.86849	-0.212975	-0.167771	-0.120352	AT1G06070	0.281327	0.248525	0.158783	0.096781	AT1G06070	Basic-leucine zipper (bZIP) transcription factor family protein [Source:TAIR;Acc:AT1G06070]	ath-miR163
ath-miR163	-0.86849	-0.212975	-0.167771	-0.120352	AT5G14830	0.943792	0.357858	0.0937406	0.365497	AT5G14830	transposable element gene [Source:TAIR;Acc:AT5G14830]	ath-miR163
ath-miR163	-0.86849	-0.212975	-0.167771	-0.120352	AT4G12120	-0.406465	-0.476992	-0.464006	-0.51681	SEC1B	Sec1/munc18-like (SM) proteins superfamily [Source:TAIR;Acc:AT4G12120]	ath-miR163
ath-miR163	-0.86849	-0.212975	-0.167771	-0.120352	AT1G54990	0.308171	0.165907	-0.488782	-0.374158	AXR4	alpha/beta-Hydrolases superfamily protein [Source:TAIR;Acc:AT1G54990]	ath-miR163
ath-miR163	-0.86849	-0.212975	-0.167771	-0.120352	AT5G38096	0.927146	0.661161	-0.150878	0.00741967	AT5G38096	Pseudogene of AT5G38100; methyltransferase-related protein [Source:TAIR;Acc:AT5G38096]	ath-miR163,ath-miR779.2
ath-miR163	-0.86849	-0.212975	-0.167771	-0.120352	AT2G12480	0.535762	0.345938	-0.303884	-0.0640569	SCPL43	serine carboxypeptidase-like 43 [Source:TAIR;Acc:AT2G12480]	ath-miR163
ath-miR173_5p	-0.355357	-0.561359	0.161672	0.650376	AT2G25730	-0.0124343	0.0766938	0.754	0.797468	AT2G25730	unknown protein; Has 157 Blast hits to 144 proteins in 62 species: Archae - 0; Bacteria - 0; Metazoa - 101; Fungi - 0; Plants - 35; Viruses - 0; Other Eukaryotes - 21 (source: NCBI BLink). [Source:TAIR;Acc:AT2G25730]	ath-miR173_5p
ath-miR173_5p	-0.355357	-0.561359	0.161672	0.650376	AT2G39681	0.798751	0.72758	0.195551	0.51106	TAS2	TAS2; other RNA [Source:TAIR;Acc:AT2G39681]	ath-miR173_5p
ath-miR173_5p	-0.355357	-0.561359	0.161672	0.650376	AT3G28007	-1.41948	-0.243153	-1.04938	-0.864529	SWEET4	Nodulin MtN3 family protein [Source:TAIR;Acc:AT3G28007]	ath-miR173_5p,ath-miR850
ath-miR173_5p	-0.355357	-0.561359	0.161672	0.650376	AT3G03810	-0.405868	-0.183408	-0.387648	-0.607447	EDA30	O-fucosyltransferase family protein [Source:TAIR;Acc:AT3G03810]	ath-miR173_5p
ath-miR173_5p	-0.355357	-0.561359	0.161672	0.650376	AT2G17480	-0.38831	-0.324672	-0.444539	-0.485987	MLO8	Seven transmembrane MLO family protein [Source:TAIR;Acc:AT2G17480]	ath-miR173_5p
ath-miR173_5p	-0.355357	-0.561359	0.161672	0.650376	AT2G31650	-0.0258524	-0.0942035	-0.0248757	-0.238567	ATX1	homologue of trithorax [Source:TAIR;Acc:AT2G31650]	ath-miR173_5p

## Sheet: S4
Table S4. Network motif analysis based on the RNA seq. data and miRNA target.
mutant	miRNA	target	target_name	miRNA_fc	target_fc	motif
hbq	ath-miR159a	AT2G32460	MYB101	0.936232	-0.785673	C4
hbq	ath-miR159a	AT2G34010	AT2G34010	0.936232	-0.561695	C4
hbq	ath-miR159a	AT3G11440	ATMYB65	0.936232	-0.410965	C4
hbq	ath-miR159a	AT3G60460	DUO1	0.936232	-0.716564	C4
hbq	ath-miR159a	AT3G61740	SDG14	0.936232	-0.269613	C4
hbq	ath-miR159a	AT5G06100	MYB33	0.936232	-0.252275	C4
hbq	ath-miR159b	AT2G32460	MYB101	0.936225	-0.785673	C4
hbq	ath-miR159b	AT2G34010	AT2G34010	0.936225	-0.561695	C4
hbq	ath-miR159b	AT3G60460	DUO1	0.936225	-0.716564	C4
hbq	ath-miR159b	AT3G61740	SDG14	0.936225	-0.269613	C4
hbq	ath-miR159b	AT4G36770	UGT72C1	0.936225	-0.971047	C4
hbq	ath-miR159c	AT3G60460	DUO1	0.936332	-0.716564	C4
hbq	ath-miR172a	AT4G36920	AP2	-0.777413	0.324505	C3
hbq	ath-miR172b_3p	AT3G14770	SWEET2	-0.777413	-0.324771	I1
hbq	ath-miR172b_3p	AT4G36920	AP2	-0.777413	0.324505	C3
hbq	ath-miR172c	AT4G36920	AP2	-0.776765	0.324505	C3
hbq	ath-miR172d	AT4G36920	AP2	-0.776765	0.324505	C3
hbq	ath-miR403	AT1G31280	AGO2	-0.931491	0.281837	C3
hbq	ath-miR403	AT3G07780	OBE1	-0.931491	-0.358515	I1
hbq	ath-miR447a.2_3p	AT5G60760	AT5G60760	0.802086	-0.307366	C4
hbq	ath-miR447b	AT5G60760	AT5G60760	-0.800166	-0.307366	I1
hbq	ath-miR846	AT5G49850	AT5G49850	1.04516	-0.603241	C4
amiR zf-HD	ath-miR157a	AT1G27360	SPL11	1.21009	-0.455174	C4
amiR zf-HD	ath-miR157a	AT1G27370	SPL10	1.21009	-0.602952	C4
amiR zf-HD	ath-miR157a	AT1G53160	SPL4	1.21009	0.601921	I2
amiR zf-HD	ath-miR157a	AT1G69170	SPL6	1.21009	-0.253784	C4
amiR zf-HD	ath-miR157a	AT2G42200	SPL9	1.21009	-0.702407	C4
amiR zf-HD	ath-miR157a	AT2G43710	SSI2	1.21009	-0.235477	C4
amiR zf-HD	ath-miR157a	AT3G57920	SPL15	1.21009	-0.721323	C4
amiR zf-HD	ath-miR157a	AT5G43270	SPL2	1.21009	0.277027	I2
amiR zf-HD	ath-miR157a	AT5G50570	SPL13A	1.21009	-1.52516	C4
amiR zf-HD	ath-miR157b	AT1G27360	SPL11	1.21009	-0.455174	C4
amiR zf-HD	ath-miR157b	AT1G27370	SPL10	1.21009	-0.602952	C4
amiR zf-HD	ath-miR157b	AT1G69170	SPL6	1.21009	-0.253784	C4
amiR zf-HD	ath-miR157b	AT2G42200	SPL9	1.21009	-0.702407	C4
amiR zf-HD	ath-miR157b	AT2G43710	SSI2	1.21009	-0.235477	C4
amiR zf-HD	ath-miR157b	AT3G57920	SPL15	1.21009	-0.721323	C4
amiR zf-HD	ath-miR157b	AT5G43270	SPL2	1.21009	0.277027	I2
amiR zf-HD	ath-miR157b	AT5G50570	SPL13A	1.21009	-1.52516	C4
amiR zf-HD	ath-miR157c	AT1G27360	SPL11	1.21009	-0.455174	C4
amiR zf-HD	ath-miR157c	AT1G27370	SPL10	1.21009	-0.602952	C4
amiR zf-HD	ath-miR157c	AT1G69170	SPL6	1.21009	-0.253784	C4
amiR zf-HD	ath-miR157c	AT2G42200	SPL9	1.21009	-0.702407	C4
amiR zf-HD	ath-miR157c	AT3G57920	SPL15	1.21009	-0.721323	C4
amiR zf-HD	ath-miR157c	AT5G43270	SPL2	1.21009	0.277027	I2
amiR zf-HD	ath-miR157c	AT5G50570	SPL13A	1.21009	-1.52516	C4
amiR zf-HD	ath-miR157d	AT1G27360	SPL11	0.844682	-0.455174	C4
amiR zf-HD	ath-miR157d	AT1G27370	SPL10	0.844682	-0.602952	C4
amiR zf-HD	ath-miR157d	AT1G53160	SPL4	0.844682	0.601921	I2
amiR zf-HD	ath-miR157d	AT1G69170	SPL6	0.844682	-0.253784	C4
amiR zf-HD	ath-miR157d	AT2G42200	SPL9	0.844682	-0.702407	C4
amiR zf-HD	ath-miR157d	AT3G57920	SPL15	0.844682	-0.721323	C4
amiR zf-HD	ath-miR157d	AT5G43270	SPL2	0.844682	0.277027	I2
amiR zf-HD	ath-miR157d	AT5G50570	SPL13A	0.844682	-1.52516	C4
amiR zf-HD	ath-miR158a	AT1G49910	BUB3.2	0.675837	0.40352	I2
amiR zf-HD	ath-miR158a	AT1G62860	AT1G62860	0.675837	0.33328	I2
amiR zf-HD	ath-miR158a	AT2G03210	FUT2	0.675837	-1.38615	C4
amiR zf-HD	ath-miR158a	AT2G03220	FT1	0.675837	0.297867	I2
amiR zf-HD	ath-miR158a	AT5G27395	AT5G27395	0.675837	0.202278	I2
amiR zf-HD	ath-miR159a	AT2G32460	MYB101	0.61913	-1.05756	C4
amiR zf-HD	ath-miR159a	AT2G34010	AT2G34010	0.61913	-0.521085	C4
amiR zf-HD	ath-miR159a	AT3G60460	DUO1	0.61913	-1.15138	C4
amiR zf-HD	ath-miR159a	AT3G61740	SDG14	0.61913	-0.256529	C4
amiR zf-HD	ath-miR159a	AT5G06100	MYB33	0.61913	-0.364462	C4
amiR zf-HD	ath-miR159b	AT2G32460	MYB101	0.619124	-1.05756	C4
amiR zf-HD	ath-miR159b	AT2G34010	AT2G34010	0.619124	-0.521085	C4
[truncated: 58 more rows]

## Sheet: S5
Table S5. Molecular perturbation grouped by TF family that is directlythat directly bound and modulated by ZF-HD TFs in Col-0, amiR zf-HD and hbq.
[truncated: 42 more rows]

[truncated: 1 more sheets: S6]
